# Supplementary material for: Biocatalytic dynamic kinetic reductive resolution with ketoreductase from Klebsiella pneumoniae: the asymmetric synthesis of functionalized tetrahydropyrans
Source: Royal Society of Chemistry journal article supplement (doi:10.1039/c9ob01681c), 2019-01-01
Supplement: c9ob01681c1.pdf [file c9ob01681c1.pdf]

### Supporting Information

#### **Biocatalytic Dynamic Kinetic Reductive Resolution with ketoreductase from *Klebsiella pneumoniae*: Asymmetric synthesis of functionalized tetrahydropyrans**

Rasmita Barik, Joydev Halder and Samik Nanda\*

Department of Chemistry, IIT Kharagpur, Kharagpur, 721302

snanda@chem.iitkgp.ac.in

| Content               | Page no |
|-----------------------|---------|
| General               | 1-2     |
| Substrate preparation | 2-5     |
| NMR spectra           | 6-104   |
| 2D NMR spectra        | 105-109 |
| HPLC profile          | 110-153 |

#### **Experimental section**

General procedures: All oxygen and/or moisture-sensitive reactions were carried out under N<sub>2</sub> atmosphere in glassware that had been flame-dried under vacuum (ca. 0.5 torr) and purged with N<sub>2</sub> prior to use. Unless otherwise stated, materials were obtained from commercial suppliers and used without further purification. THF and diethyl ether were distilled from sodium benzophenone ketyl. Dichloromethane (DCM) and hexane were distilled from calcium hydride. Ketoreductase strain of *K. pneumoniae* (NBRC 3319) was obtained from NBRC, Japan. Reactions were stirred magnetically using Teflon-coated magnetic stirring bars. Teflon-coated magnetic stirring bars and syringe needles were dried in an oven at 120 °C for at least 12 h prior to use, then cooled in a desiccator cabinet over Drierite. Reactions were monitored by thin-layer chromatography (TLC) carried out on 0.25 mm silica gel plates with UV light as a visualizing agent and ethanolic anisaldehyde/heat as a developing agent. Silica gel 100–200 mesh was used for column chromatography. Yields refer to chromatographically and spectroscopically homogeneous materials unless otherwise stated. NMR spectra were recorded on 600,400,500 and 200 MHz spectrometers at 25 °C in and calibrated using residual undeuterated solvent as an internal reference. Chemical shifts are shown in  $\delta$ . <sup>13</sup>C NMR spectra were recorded in a complete

proton decoupling environment. Coupling constants ( $J$ ) are reported in hertz (Hz), and the resonance multiplicity abbreviations used are s, singlet; d, doublet; dd, doublet of doublet; t, triplet; q, quartet; m, multiplet; and comp, overlapping multiplets of magnetically non-equivalent protons. IR spectra were recorded on a Perkin Elmer IR spectrometer. The mass spectrometric analysis was performed in the CRF, IIT-Kharagpur (TOF analyzer). Chiral HPLC analysis was performed with Shimadzu 20AT prominence system with Daicel Chiral Pak OD-H, IC, IA(25 cm  $\times$  0.46 cm  $\varnothing$ ) as the stationary phase. The racemic standard for HPLC analysis was prepared by  $\text{NaBH}_4$  reduction of corresponding  $\alpha$ -benzyl/cinnamyl-substituted- $\beta$ -ketoesters. In principle, the racemic compounds should provide four peaks in a chiral stationary phase. In the majority of cases, we observed four peaks, in some cases, overlapping peaks were also observed.

**Substrate synthesis:** ( $\pm$ )- $\alpha$ -cinnamyl-substituted- $\beta$ -ketoesters (**5a-5n**) were prepared according to the following scheme

**Scheme-S1**

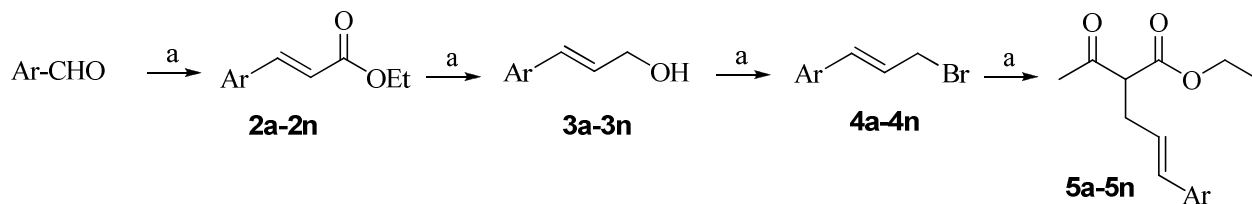

**Ethyl cinnamates (2a-2n):** To a suspension of  $\text{NaH}$  (1 eq) in THF, triethylphosphonoacetate (1eq) were added sequentially at  $0^\circ\text{C}$  and stirred for 45 minutes, after 45 minutes the corresponding aldehydes (1eq) were added into the reaction mixture at  $0^\circ\text{C}$  and left the reaction 3-4 hr at room temperature. After completion of the reaction, the reaction solution was quenched with saturated ammonium chloride, and the organic phase extracted with ethylacetate. It was then washed with brine and dried over anhydrous  $\text{Na}_2\text{SO}_4$ . The solvent was evaporated under reduced pressure, and the product was purified by flash column chromatography (EtOAc/hexane = 1: 10) to furnish compounds **2a-2n** in good yield.  $R_f$  = approx. 0.5 (EtOAc/ hexane = 1: 10). All the synthesized compounds are reported in the literature and provide comparable spectral characteristic values.<sup>1(a-c)</sup>

**Substituted (*E*)-cinnamyl alcohols ( 3a-3n):** To a solution of compounds **2a-2n** (1eq) in dry THF, DIBAL-H in THF (2eq.) was added at  $0^\circ\text{C}$ , and the reaction mixture was allowed to warm

at room temperature. Subsequently, the reaction solution was stirred for 3-4 hr, and then it was quenched with saturated sodium-potassium tartrate solution and filtered through a Celite pad and washed with ethyl acetate. The combined organic layer was dried over anhydrous Na<sub>2</sub>SO<sub>4</sub>. The solvent was evaporated under reduced pressure, and the product was purified by flash column chromatography (EtOAc/hexane = 1: 10) to furnish compound **3a-3n** in approximate 85% yield. R<sub>f</sub> = approx. 0.1 (EtOAc/ hexane = 1: 10). All the synthesized compounds are reported in the literature and provide comparable spectral characteristic values.<sup>2(a-c)</sup>

**Substituted (*E*-cinnamyl bromides; 4a-4n):** To a solution of compound **3a-3n** (1eq) in dry ether, PBr<sub>3</sub>(0.8eq) was added at 0 °C, and the reaction mixture was stirred at the same temperature for 1hr. The reaction solution was then quenched with the careful addition of saturated NaHCO<sub>3</sub> solution and extracted with ether. The organic layer was washed with brine and dried over anhydrous Na<sub>2</sub>SO<sub>4</sub>. The solvent was evaporated under reduced pressure, and the product was used for the next step without purification. R<sub>f</sub> = approx. 0.7 (EtOAc/ hexane = 1: 10). All the synthesized compounds are reported in the literature and provide comparable spectral characteristic values.<sup>3(a-b)</sup>

**Substrate mapping for DKRR pathway with *K. pneumoniae* :** As discussed in the manuscript (Scheme 1), a detailed substrate scope was also investigated by us based on the results reported here as well as in our earlier article.<sup>4</sup> It was observed that the enzyme system only accepts structural variation at  $\alpha$ -position of the parent  $\beta$ -ketoesters for the DKRR reaction. Different alkyl groups are well tolerated in  $\alpha$ -position for the DKRR reaction. Allyl, homo-allyl, and propargyl appendages are also well accepted, as shown by us in the earlier paper. Substituted benzyl groups (containing ERG and EWG in the aromatic ring), thiophene moiety, 1-naphthyl and 2-naphthyl (with different substitution on the aryl ring) were also accepted by the enzyme system (Scheme 4 in the present manuscript). Any extra substitution at the  $\gamma$ -position was not accepted by the enzyme system. And after incubation with the growing cells of *K. pneumoniae* the starting materials remain unreacted even after 10 days. It seems that presence of the ketomethyl group (-COMe) is an essential prerequisite for successful DKRR reaction for acyclic  $\alpha$ -substituted- $\beta$ -ketoesters. For the cyclic  $\beta$ -ketoesters, it was found that substrates (**S1-S3**; commercially available) were well accepted by the enzyme systems. Cyclic  $\beta$ -ketoesters having 1-indanone (**S4**) and 1-tetralone framework (**S5**) seems to be not accepted by the enzyme system.

Both **S4** and **S5** are commercially available and used as obtained from the vendors without any further purification. It seems that the enzyme system does not tolerate any substitution on the  $\gamma$ -position. Cyclic  $\beta$ -ketoesters having a Me- substitution at  $\gamma$ -position (**S6** and **S7**; **S6** was commercially available and used as obtained. **S7** was prepared through a literature method<sup>5</sup>) were not reactive at all. Though the results are little premature, still it can be concluded that this particular enzyme system is very specific towards a certain class of  $\alpha$ -substituted- $\beta$ -ketoesters (acyclic and cyclic). Further substrate scope is very much needed to have a final conclusion. In future we would like to explore in that direction.

### Scheme S2

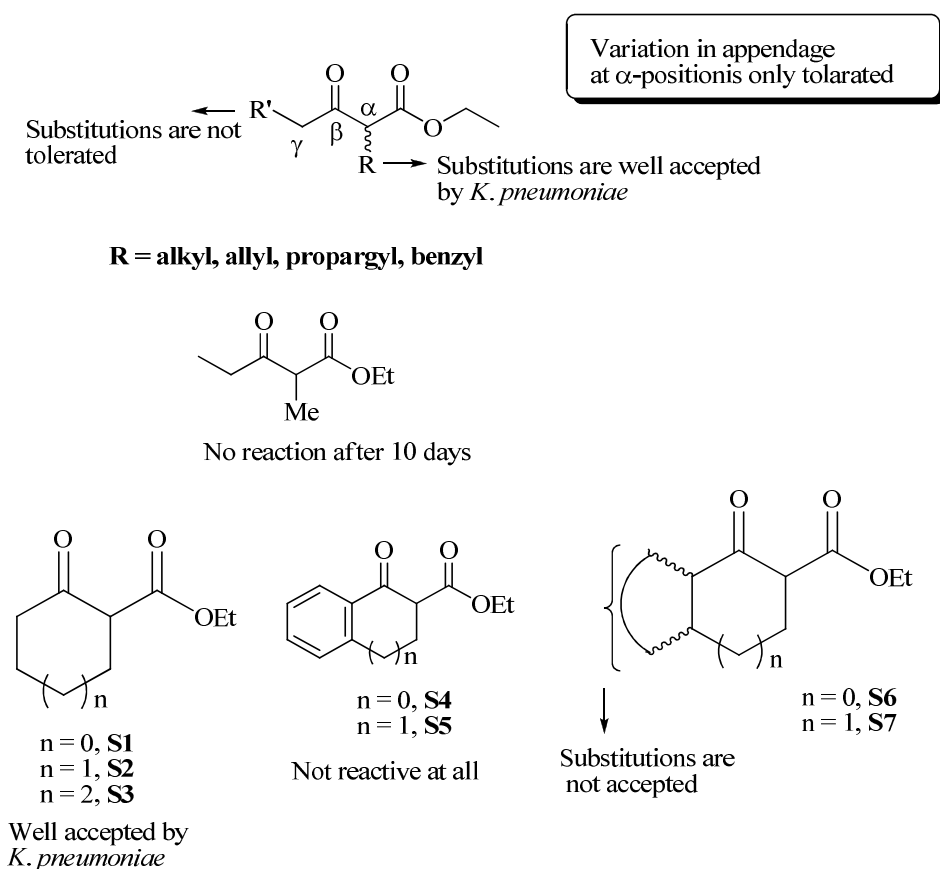

### References:

- (a) S. Einaru, K. Shitamichi, T. Nagano, A. Matsumoto, K. Asano and S. Matsubara, *Angew. Chem. Int. Ed.* **2018**, *57*, 13863 –13867; (b) R. Sato, K. Oyama, H. Konno, *Tetrahedron*, **2018**, *74*, 6173-6181; (c) S. Sano, K. Yokoyama, M. Fukushima, T. Yagi, and Y. Nagao, *Chem. Commun.*, **1997**, 559-560.

2. (a) X. Jiang and J. F. Hartwig, *Angew. Chem. Int. Ed.* **2017**, *56*, 8887–8891. (b) S. Rao and K. R. Prabhu, *Org. Lett.* **2017**, *19*, 846–849. (c) L. Liu, X. Bao, H. Xiao, J. Li, F. Ye, C. Wang, Q. Cai, and S. Fan, *J. Org. Chem.*, **2019**, *84*, 423–434.
3. (a) E. Pavlakos, T. Georgiou, M. Tofi, T. Montagnon, and G. Vassilikogiannakis, *Org. Lett.*, **2009**, *11*, 4556–4559. (b) H. Sugiura, S. Yamazaki, K. Go, and A. Ogawa, *Eur. J. Org. Chem.* **2019**, 204–220.
4. (a) D. Das, J. Halder, R. Bhuniya, S. Nanda, *Eur. J. Org. Chem.* **2014**, 5229–5246. (b) R. Bhuniya, T. Mahapatra, S. Nanda, *Eur. J. Org. Chem.*, **2012**, 1597–1602.
5. Z. Li, S. M. Lam, I. Ip, W. Wong, P. Chiu, *Org. Lett.*, **2017**, *19*, 4464–4467.

### $^1\text{H}$ NMR of compound (1a) (400 MHz, $\text{CDCl}_3$ )

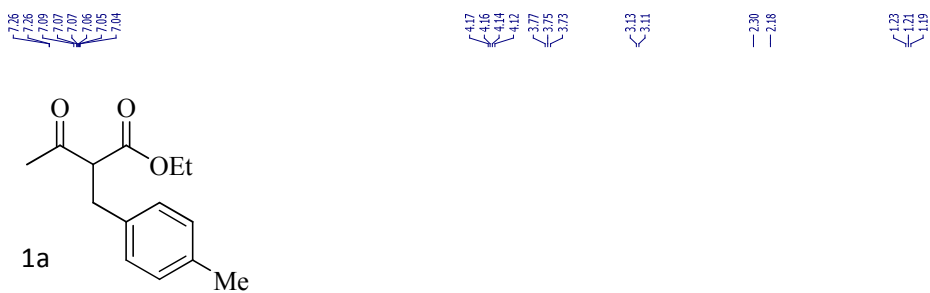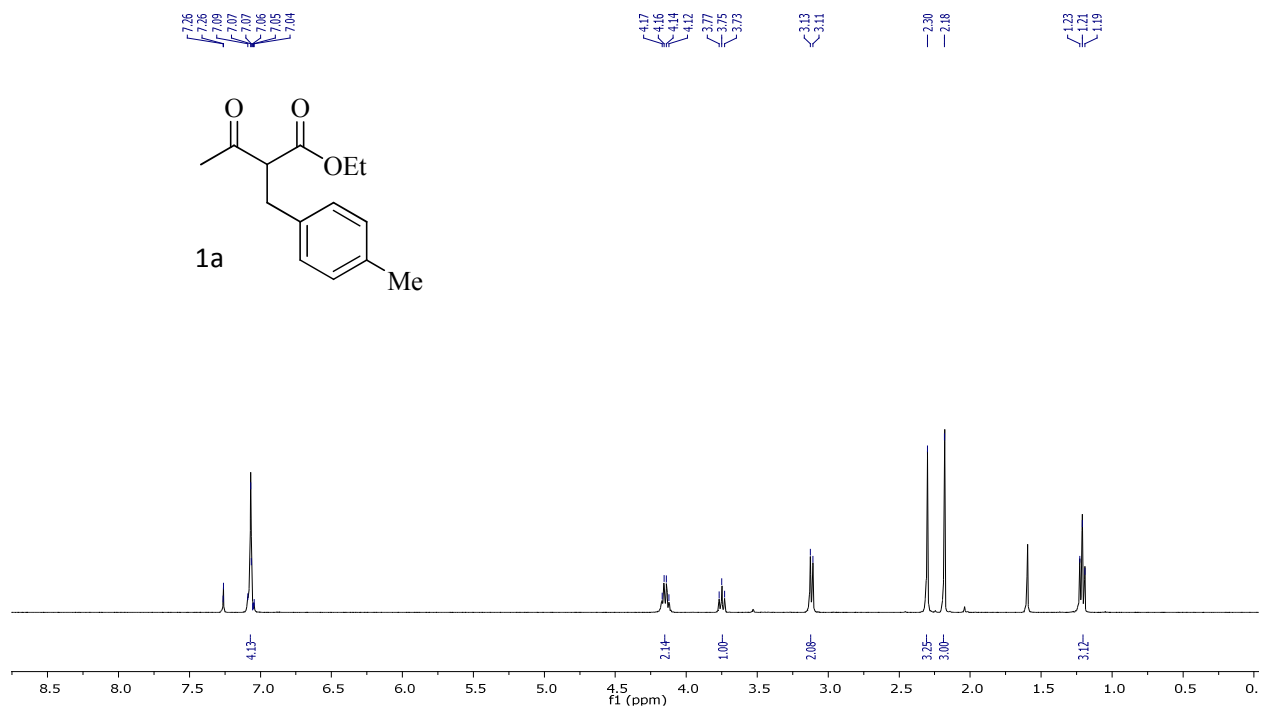

### $^{13}\text{C}$ NMR of compound (1a) (100 MHz, $\text{CDCl}_3$ )

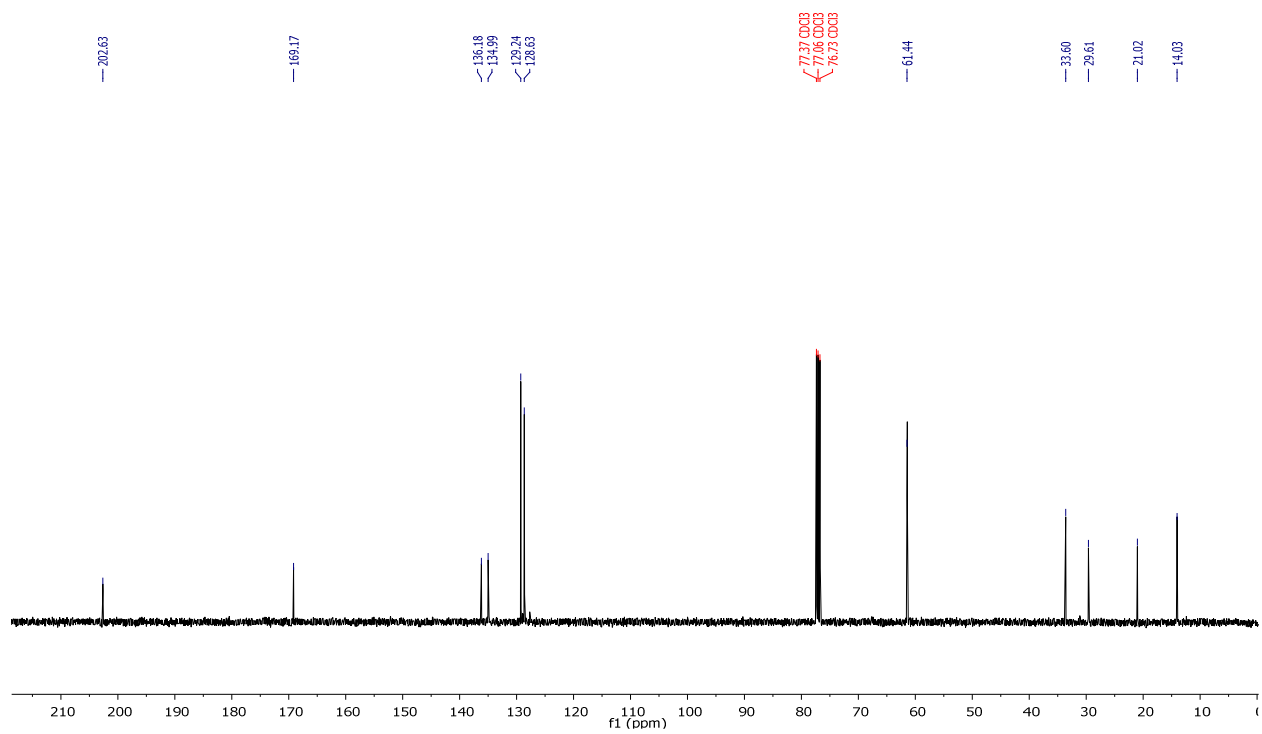

DEPT-135 of compound (1a) (100 MHz, CDCl<sub>3</sub>)

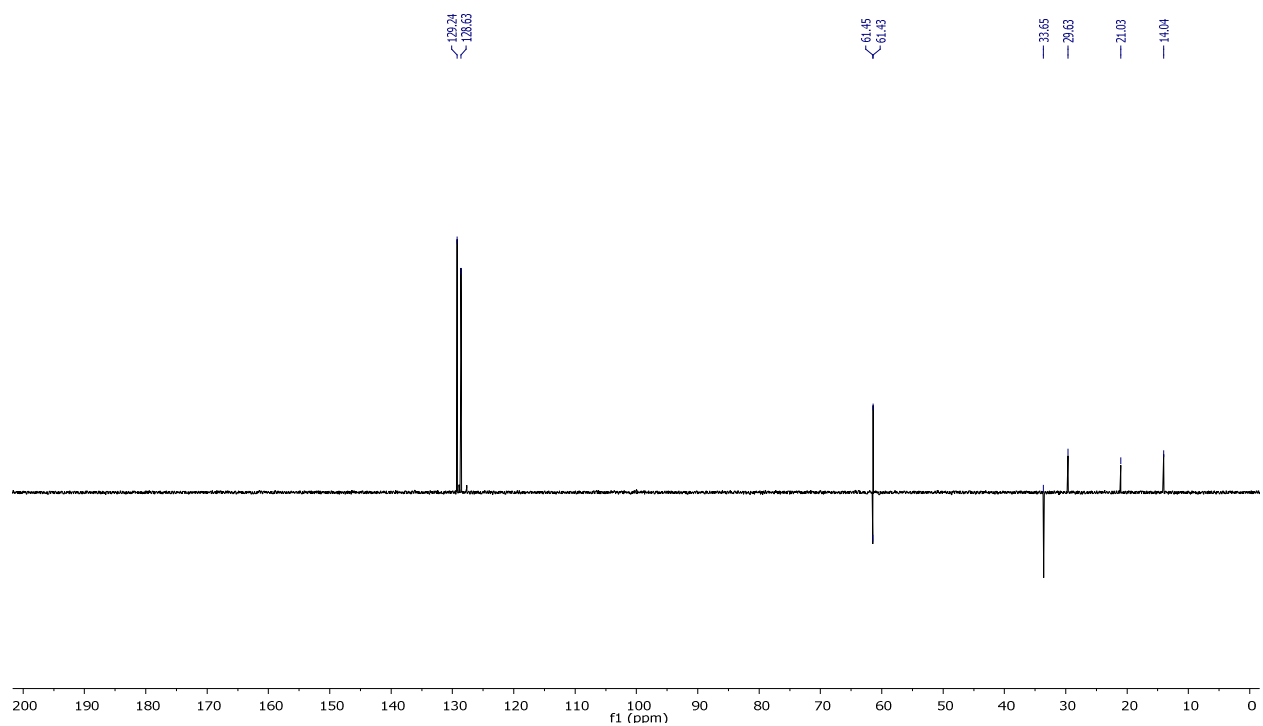

<sup>1</sup>H NMR of compound (1b) (400 MHz, CDCl<sub>3</sub>)

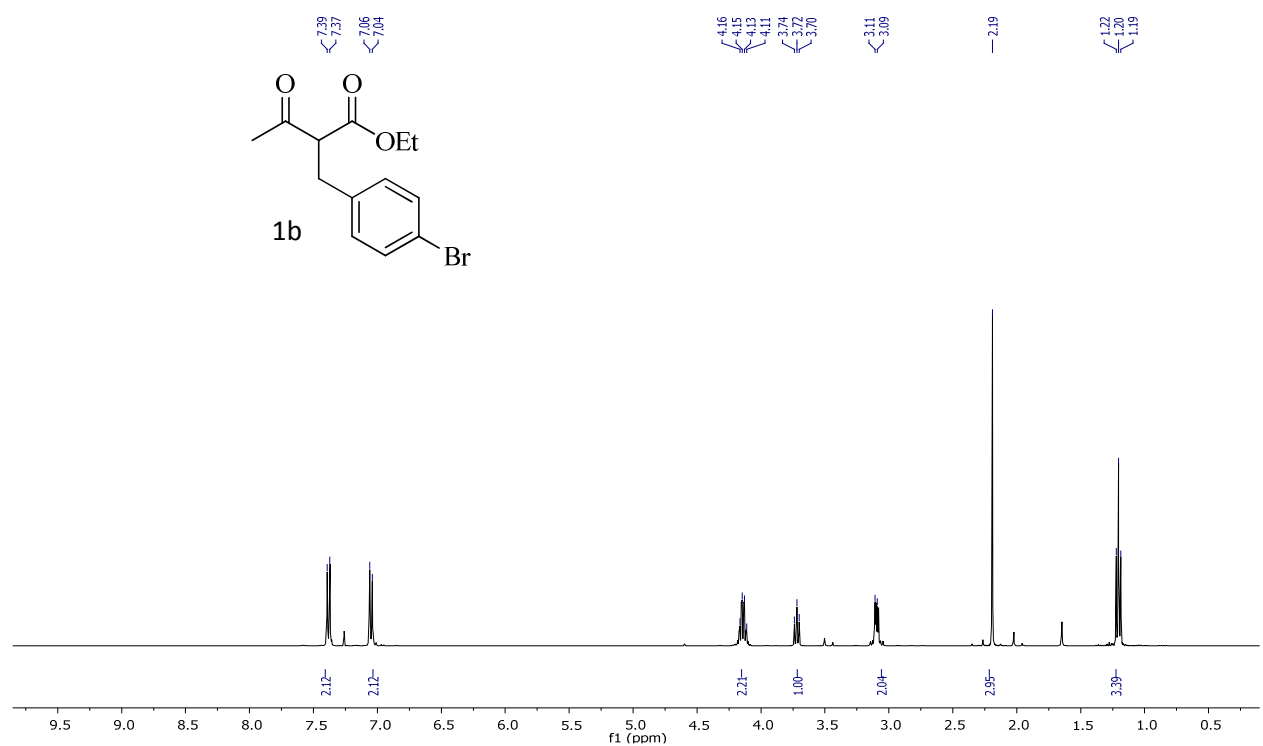

### $^{13}\text{C}$ NMR of compound (1b) (100 MHz, $\text{CDCl}_3$ )

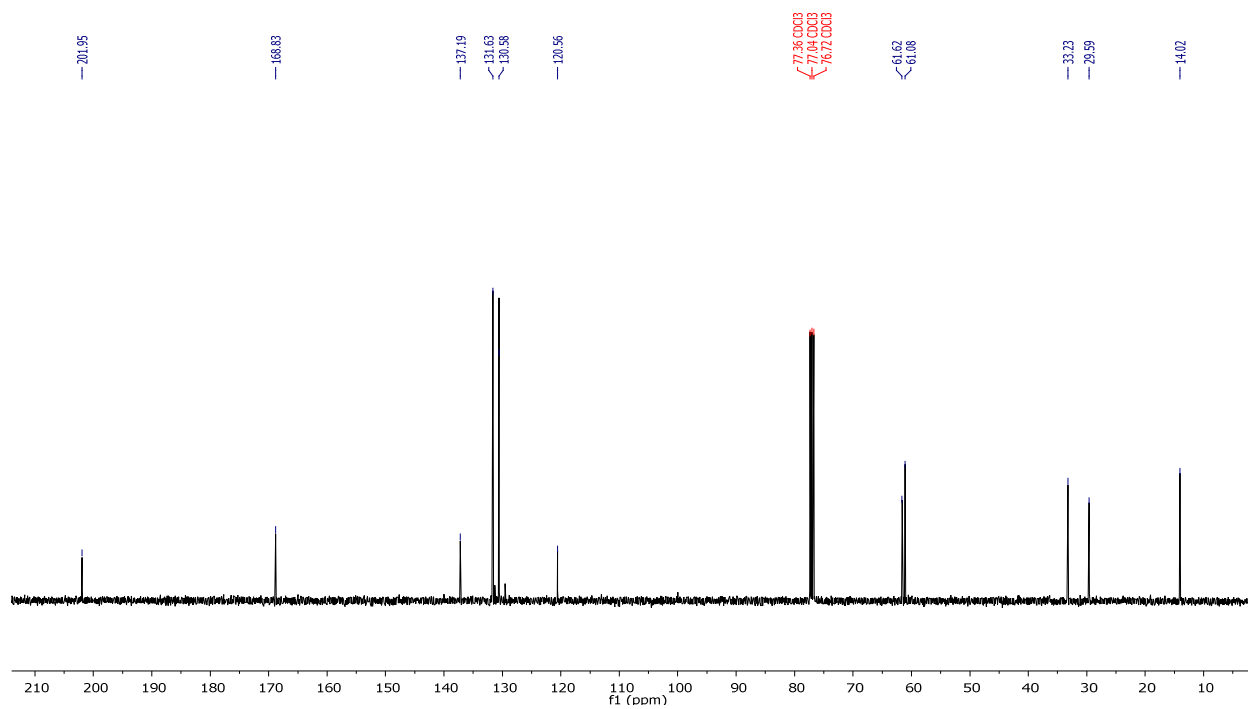

### DEPT-135 of compound (1b) (100 MHz, $\text{CDCl}_3$ )

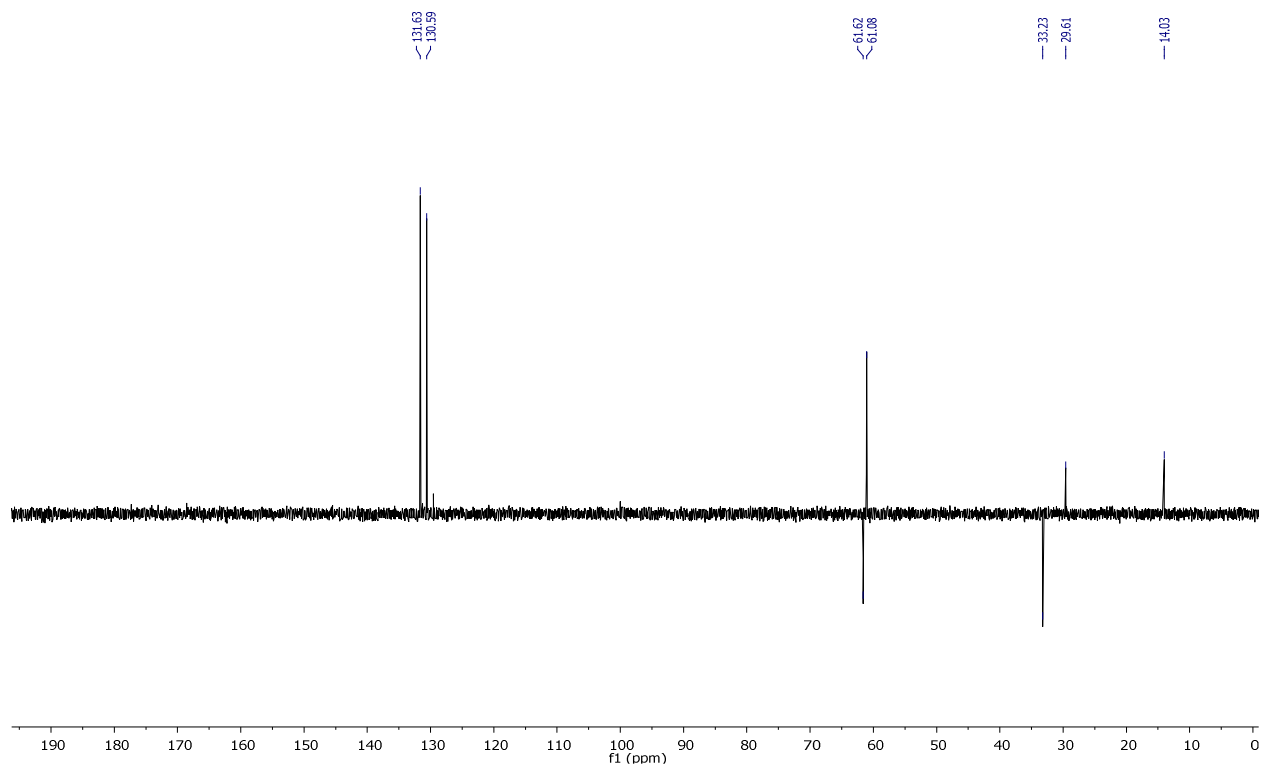



# <sup>1</sup>H NMR of compound (1c) (400 MHz, CDCl<sub>3</sub>)

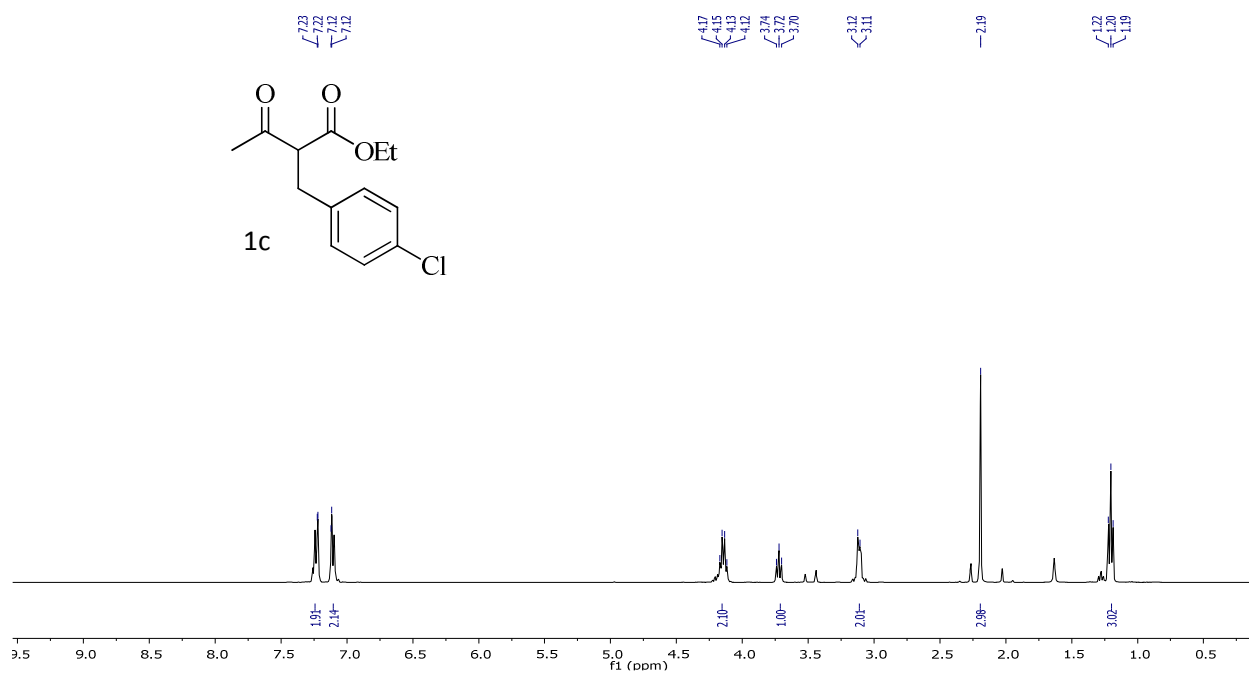

# <sup>13</sup>C NMR of compound (1c) (100 MHz, CDCl<sub>3</sub>)

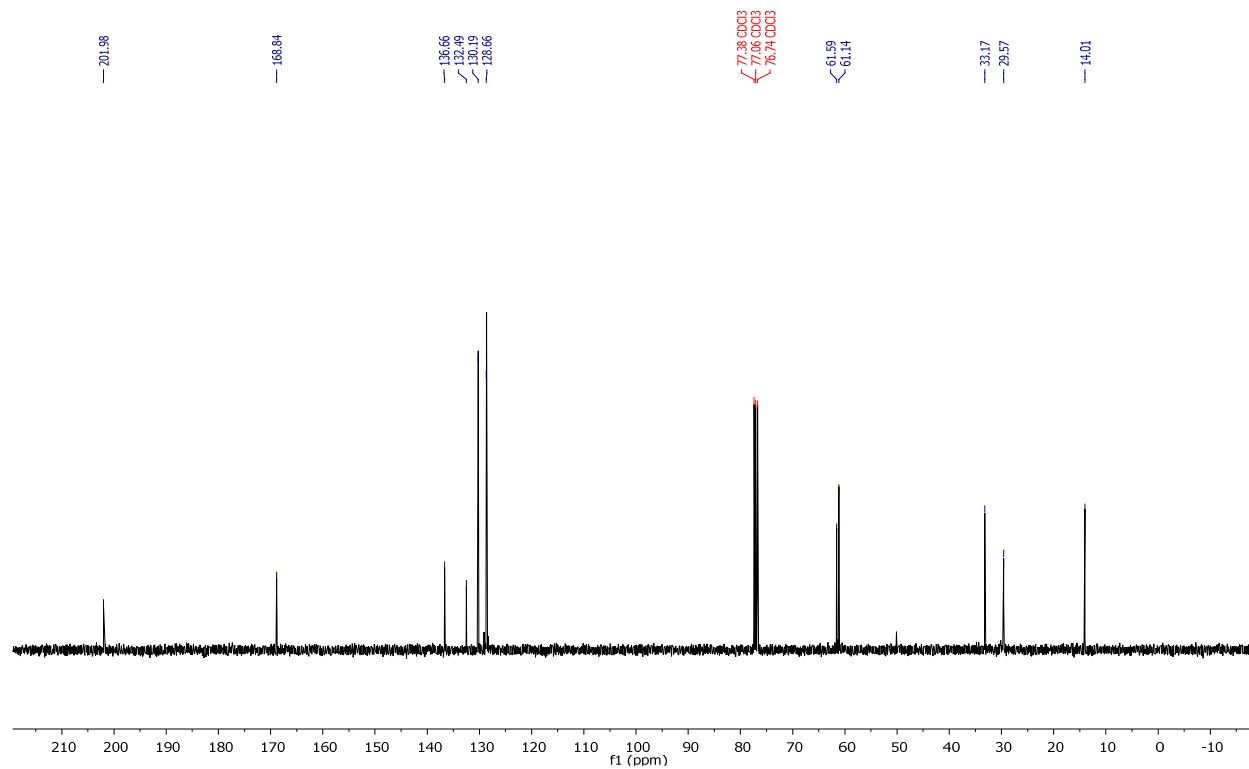

### DEPT-135 of compound (1c) (100 MHz, CDCl<sub>3</sub>)

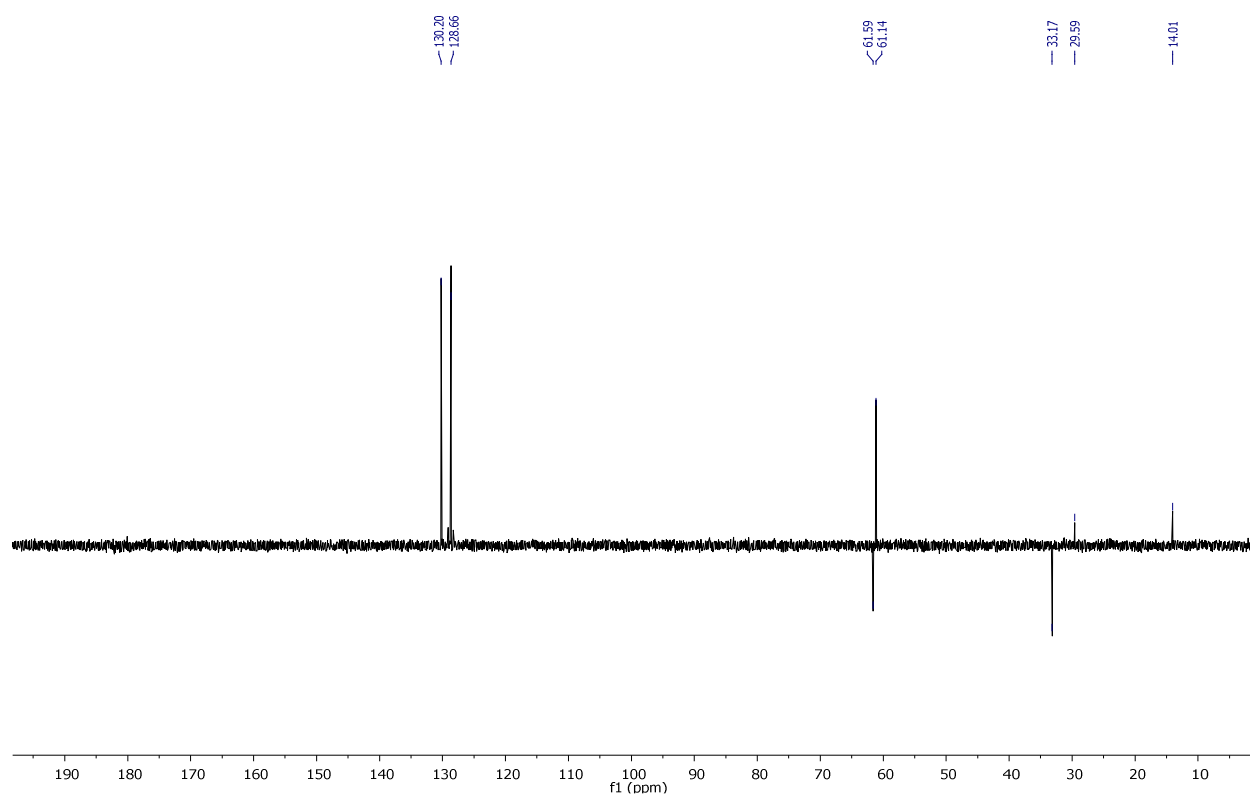

### <sup>1</sup>H NMR of compound (1d) (400 MHz, CDCl<sub>3</sub>)

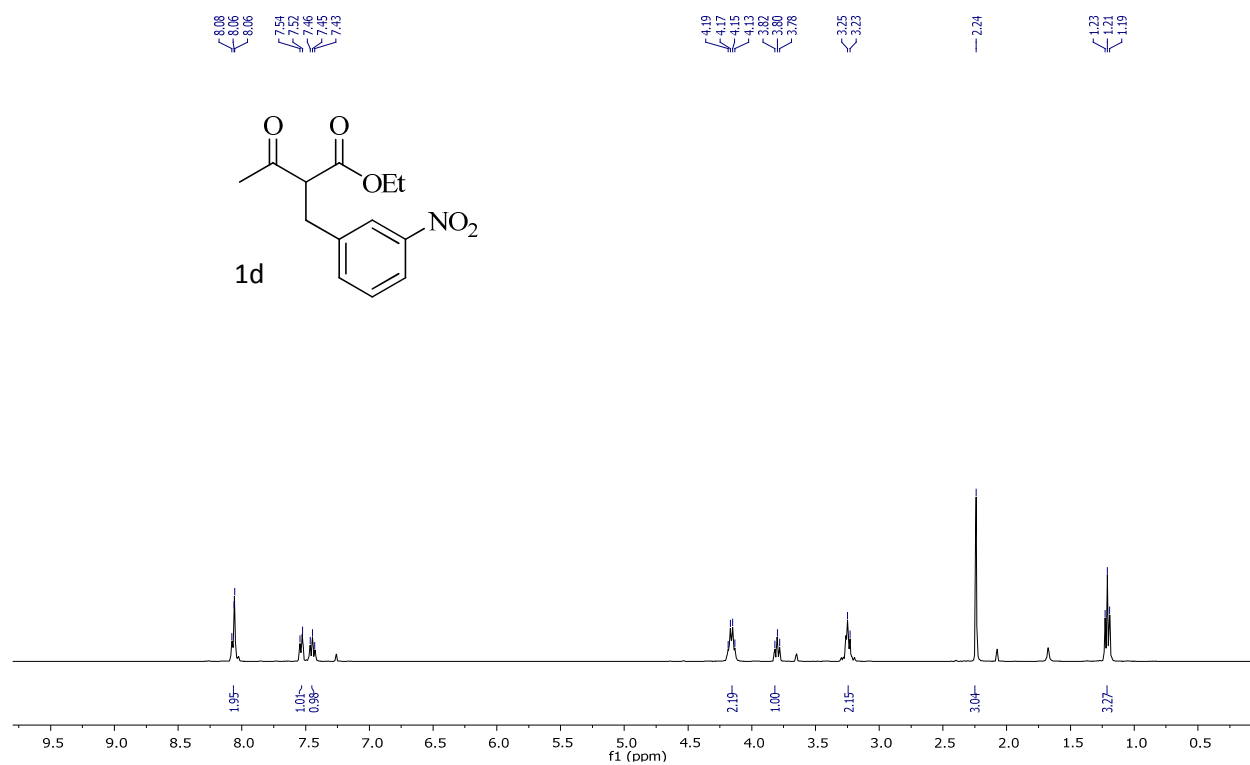

**$^{13}\text{C}$  NMR of compound (1d) (100 MHz,  $\text{CDCl}_3$ )**

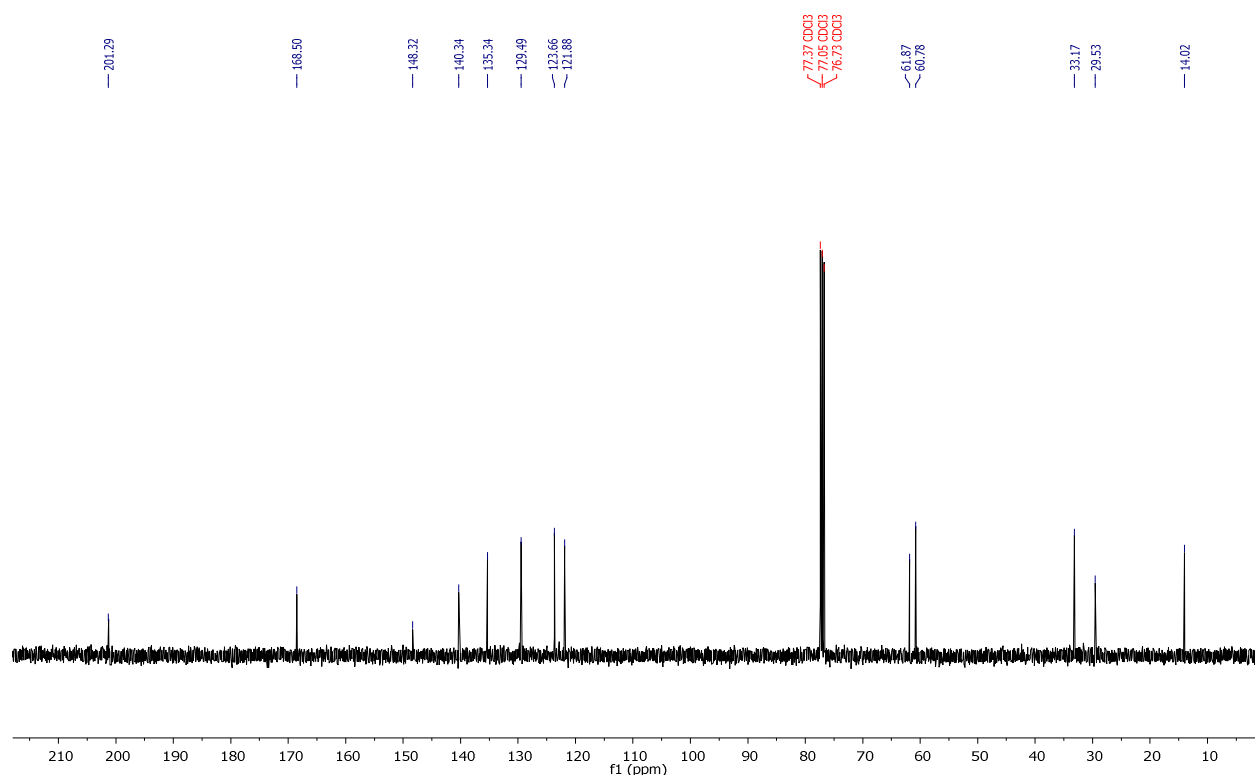

**DEPT-135 of compound (1d) (100 MHz,  $\text{CDCl}_3$ )**

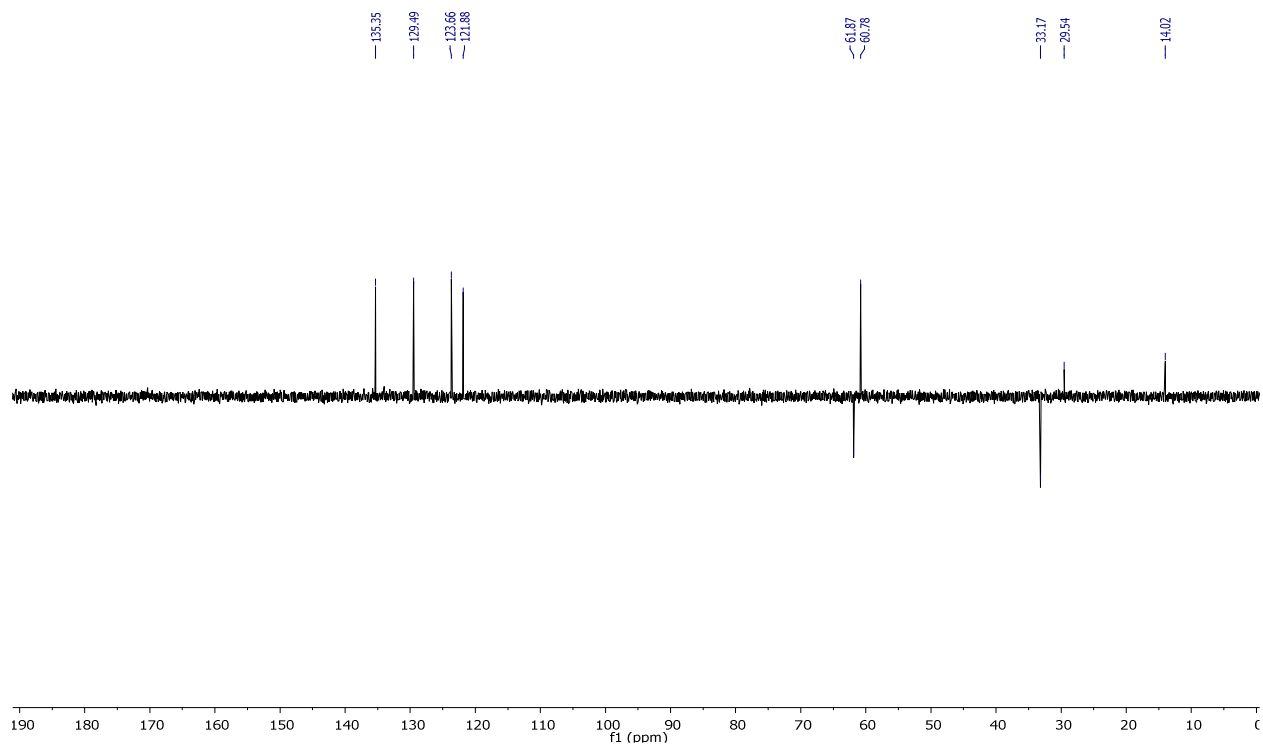

### $^1\text{H}$ NMR of compound (1e) (400 MHz, $\text{CDCl}_3$ )

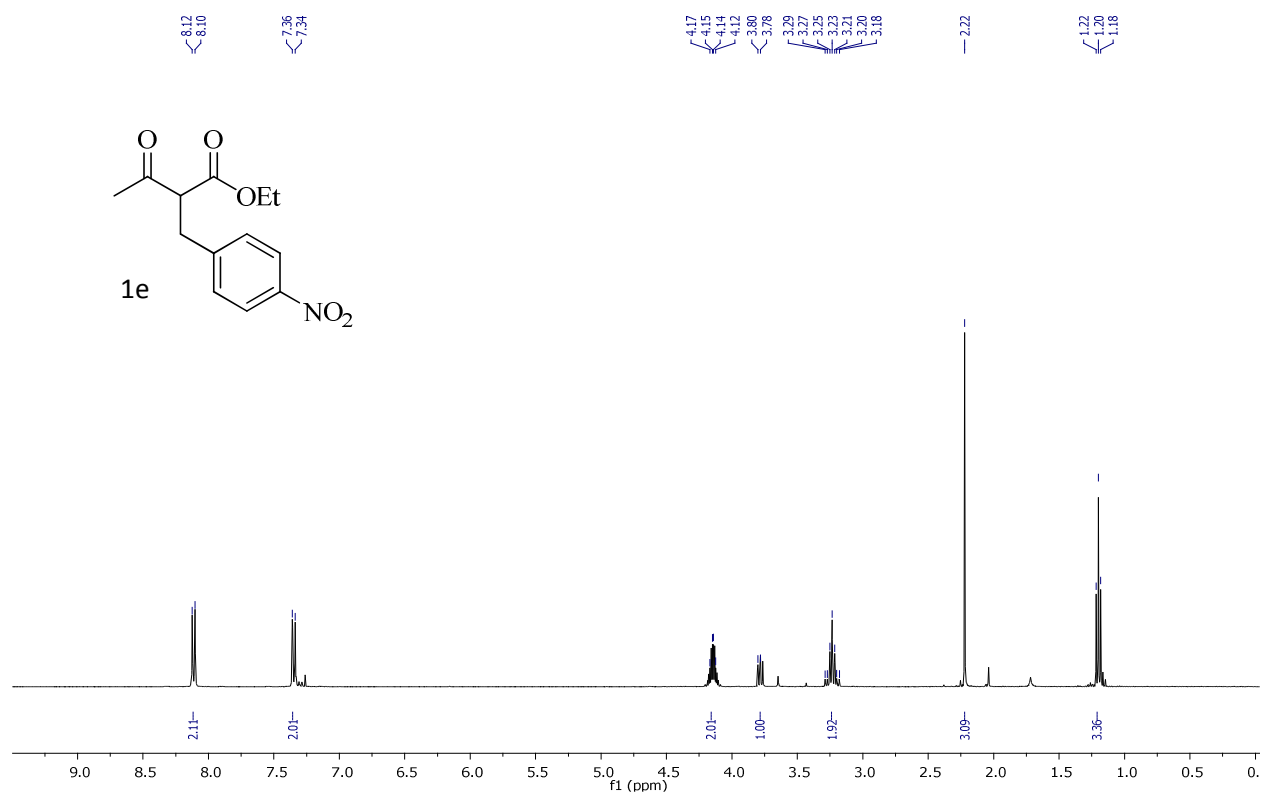

### $^{13}\text{C}$ NMR of compound (1e) (100 MHz, $\text{CDCl}_3$ )

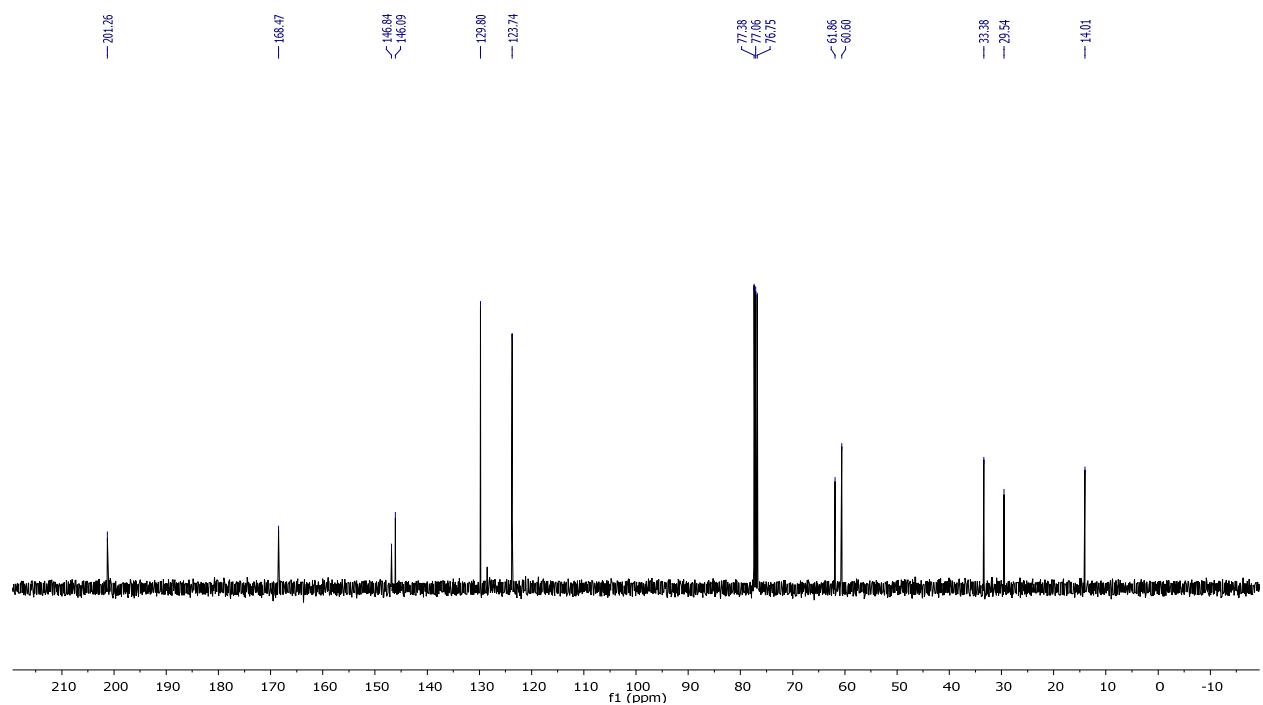

### DEPT-135 of compound (1e) (100 MHz, CDCl<sub>3</sub>)

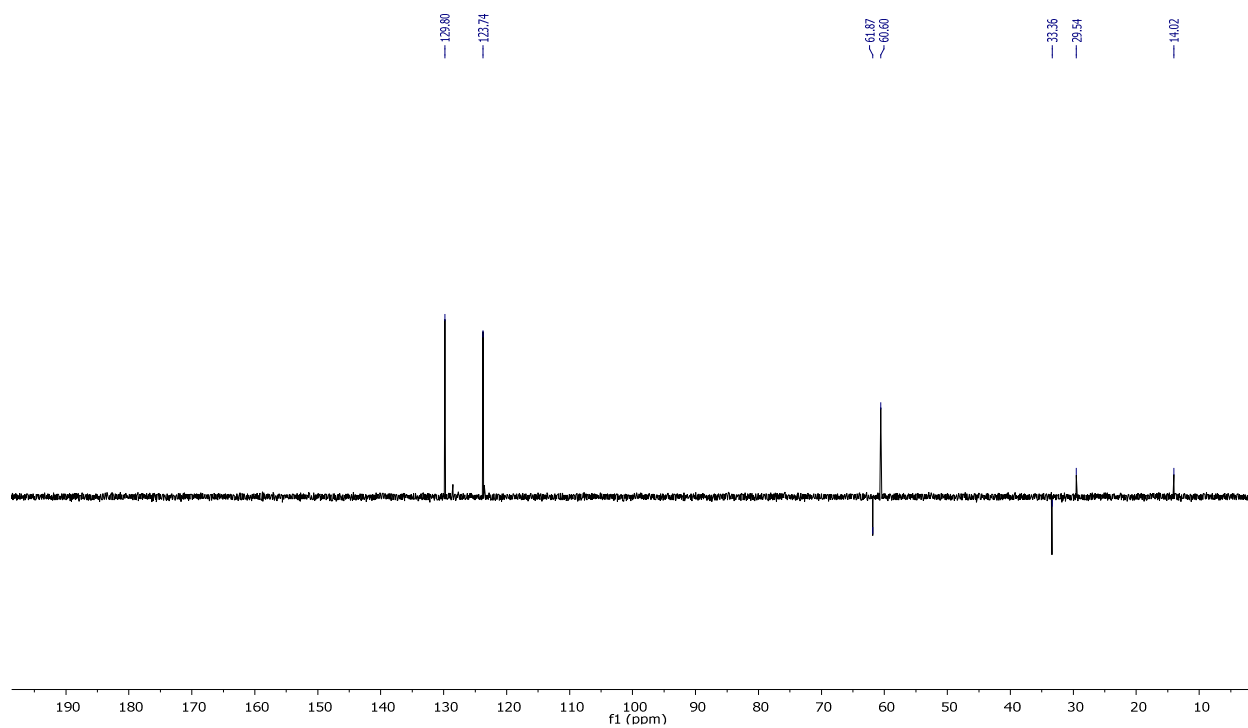

### <sup>1</sup>H NMR of compound (1f) (400 MHz, CDCl<sub>3</sub>)

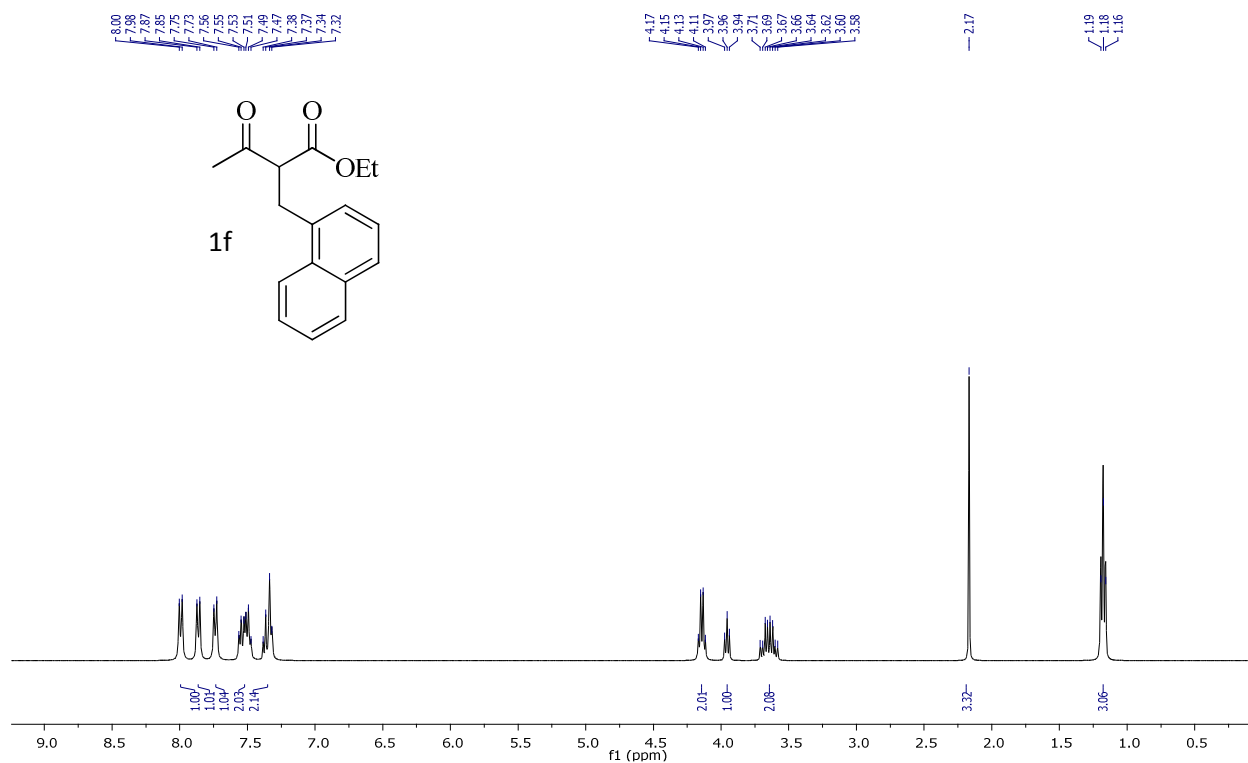

### $^{13}\text{C}$ NMR of compound (1f) (100 MHz, $\text{CDCl}_3$ )

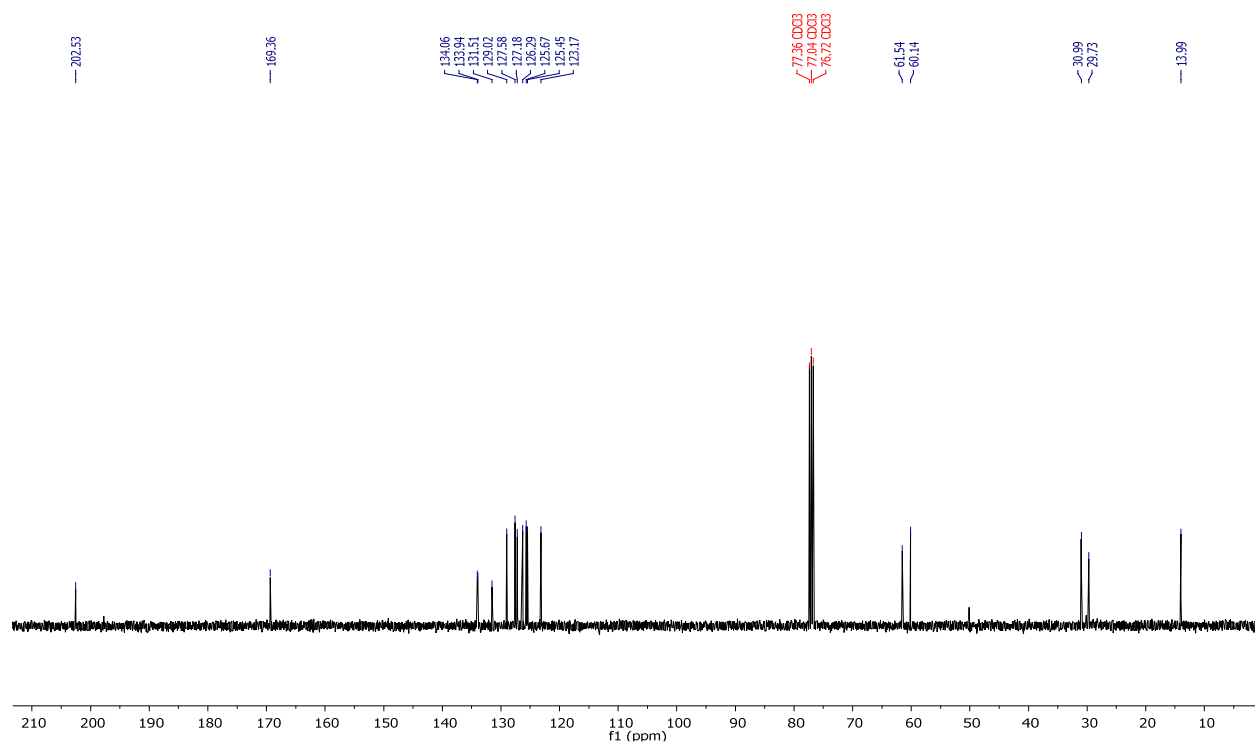

### DEPT-135 of compound (1f) (150 MHz, $\text{CDCl}_3$ )

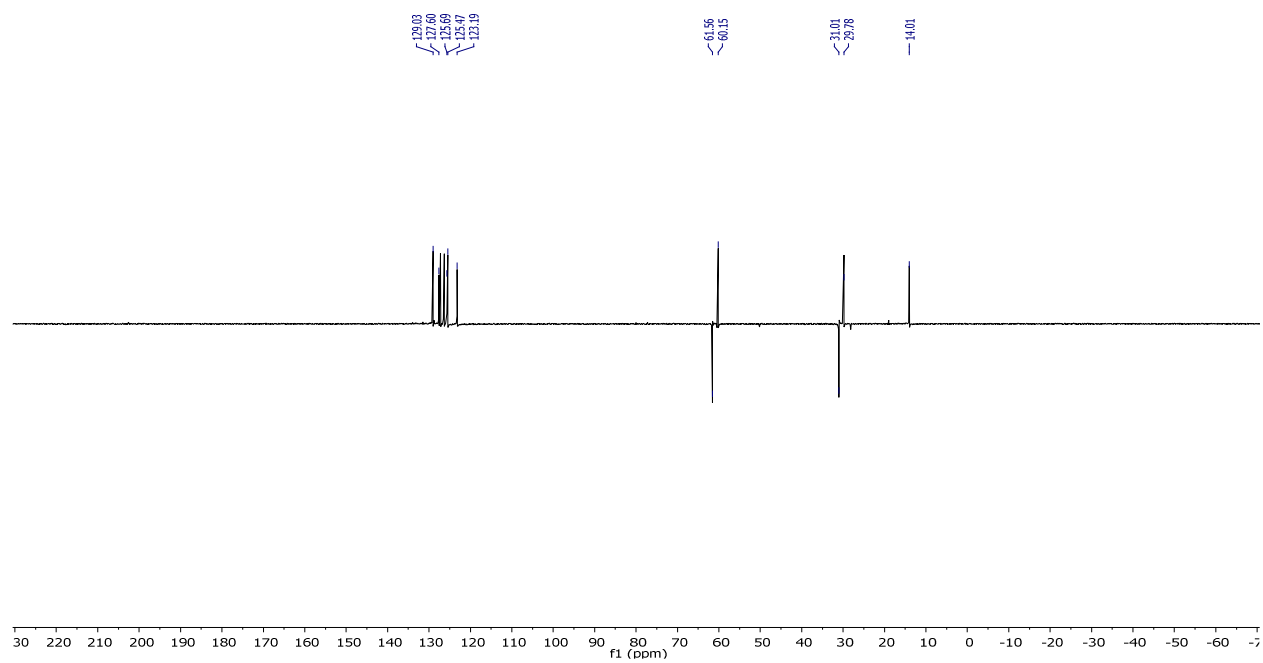

### $^1\text{H}$ NMR of compound (1g) (400 MHz, $\text{CDCl}_3$ )

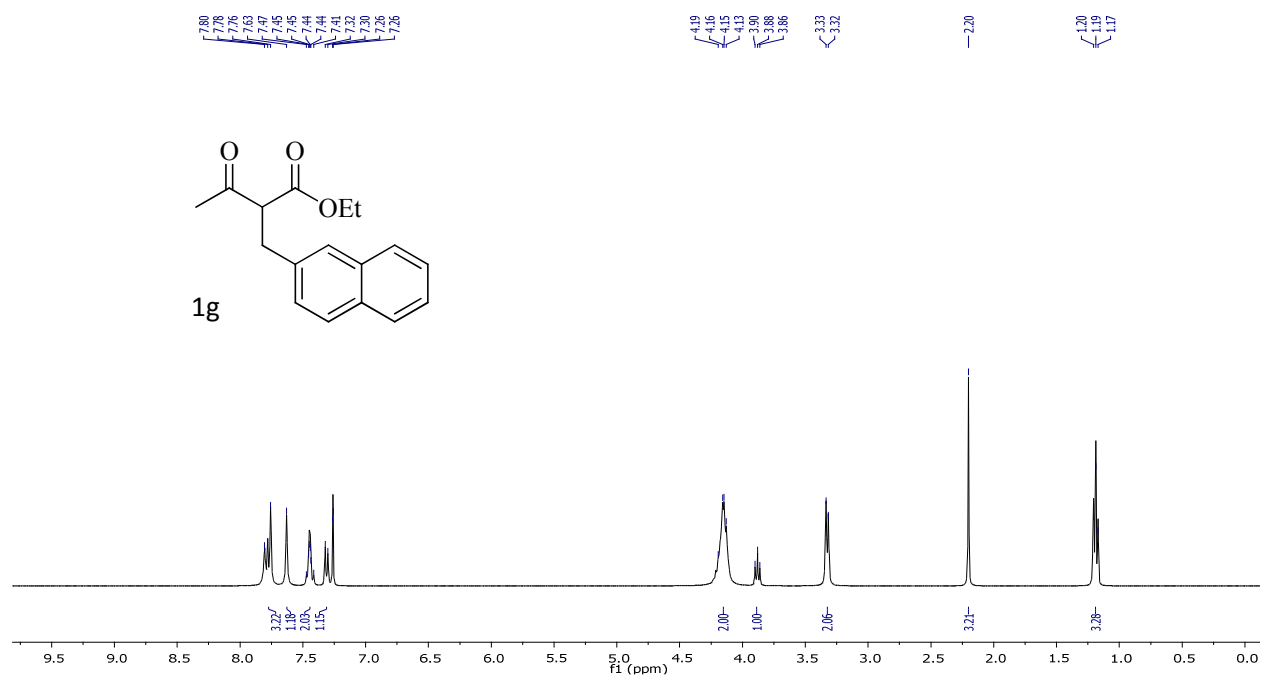

### $^{13}\text{C}$ NMR of compound (1g) (100 MHz, $\text{CDCl}_3$ )

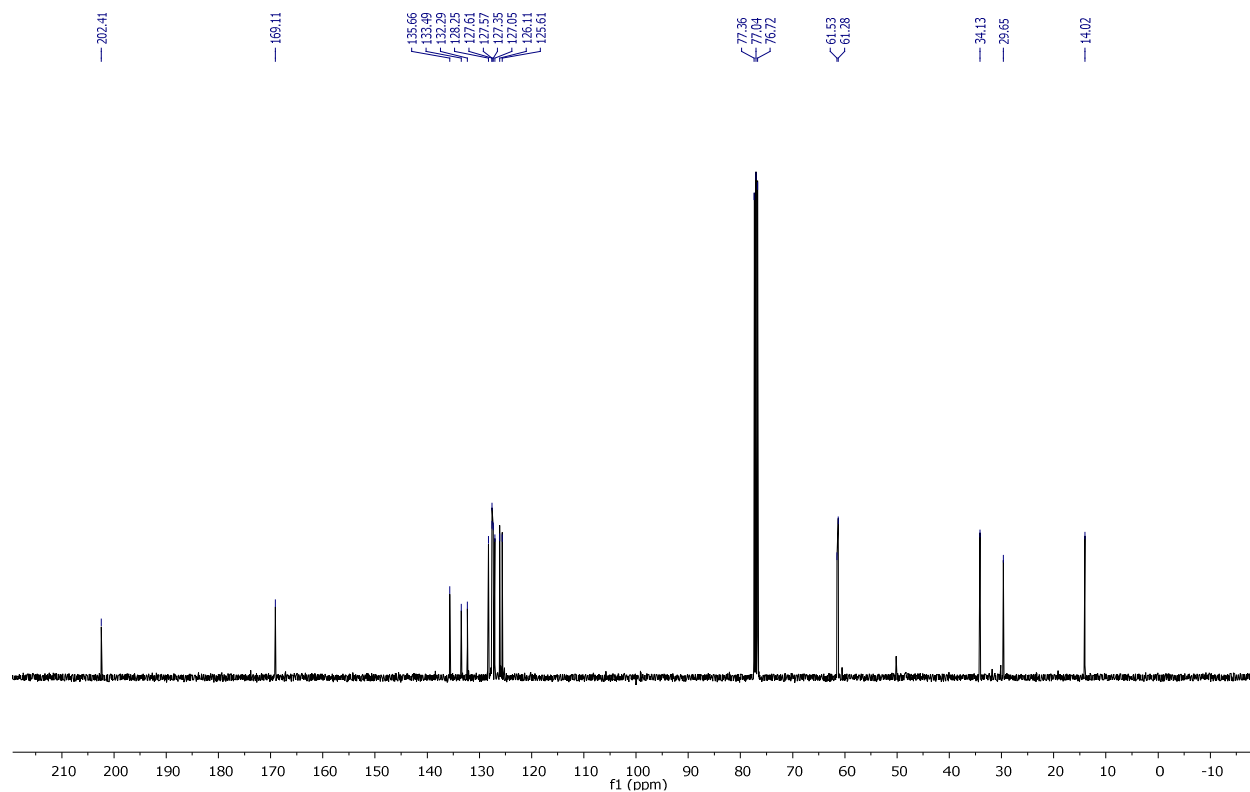

### DEPT-135 of compound (1g) (100 MHz, CDCl<sub>3</sub>)

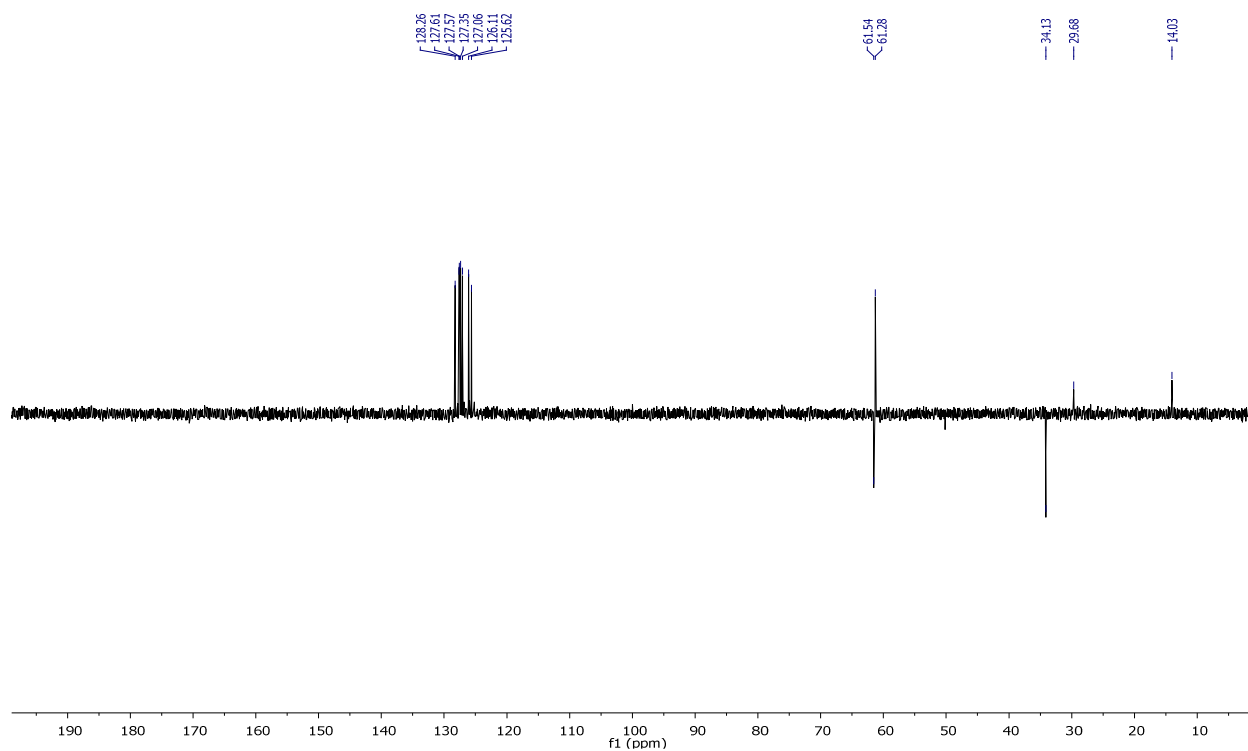

### <sup>1</sup>H NMR of compound (1h) (400 MHz, CDCl<sub>3</sub>)

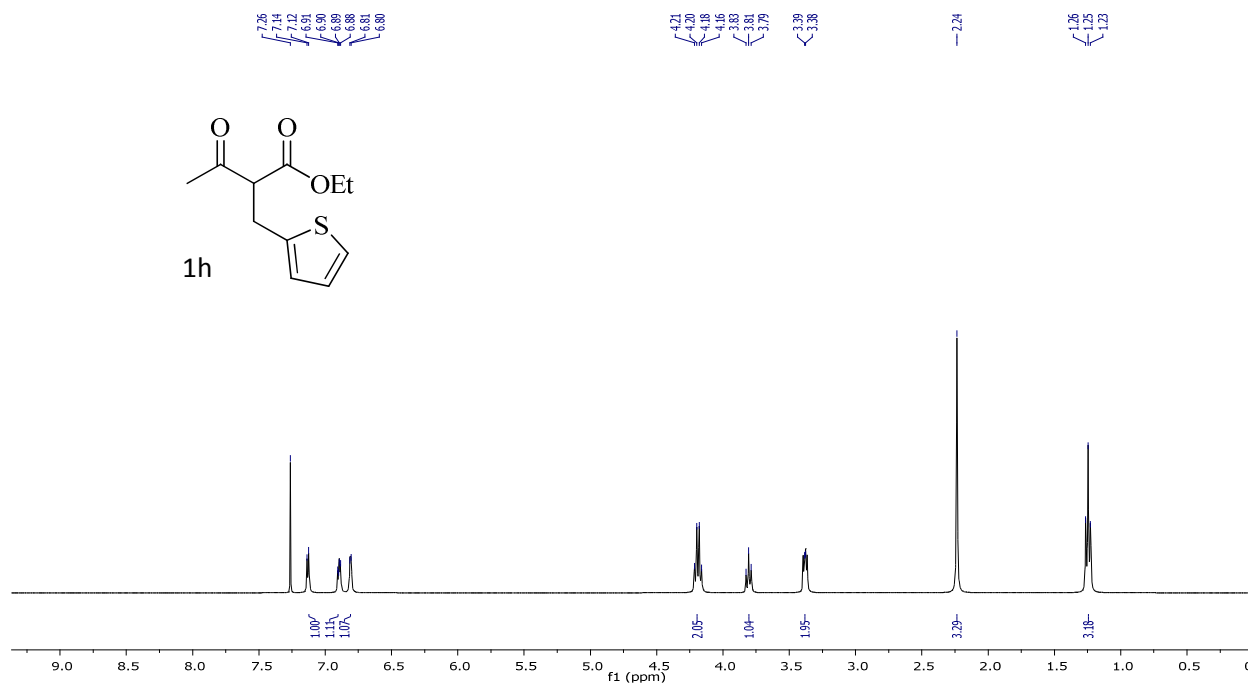



**$^{13}\text{C}$  NMR of compound (1h) (150 MHz,  $\text{CDCl}_3$ )**

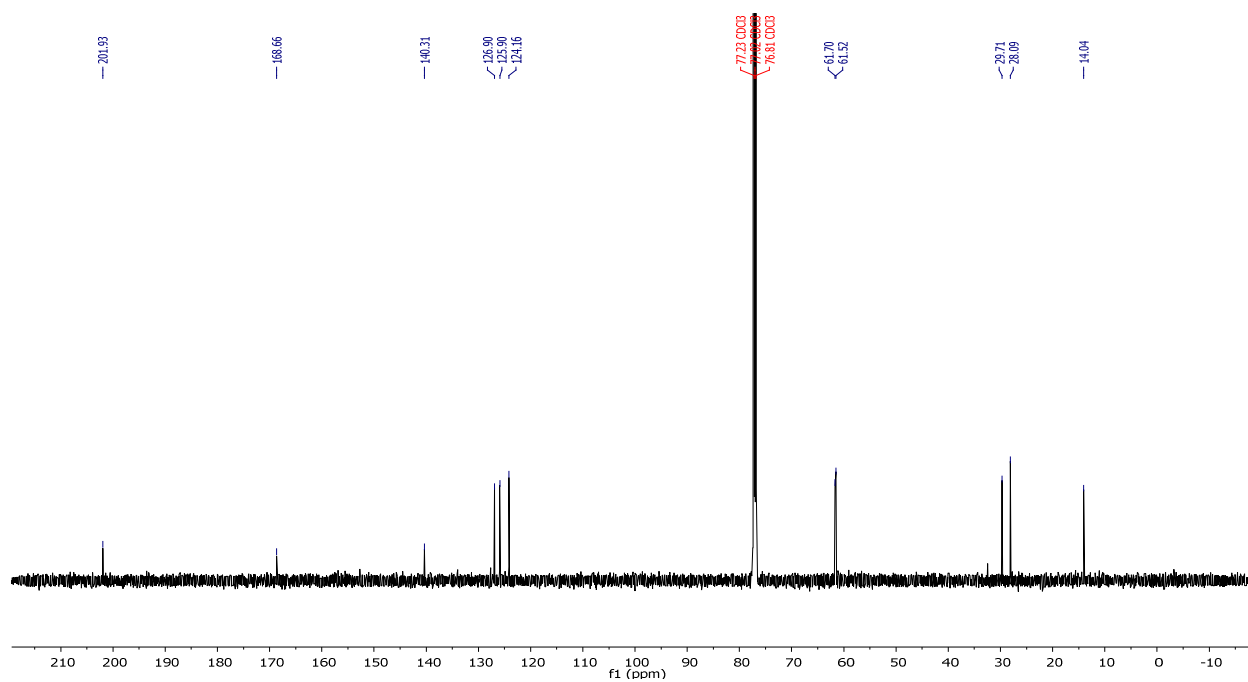

**DEPT-135 of compound (1h) (150 MHz,  $\text{CDCl}_3$ )**

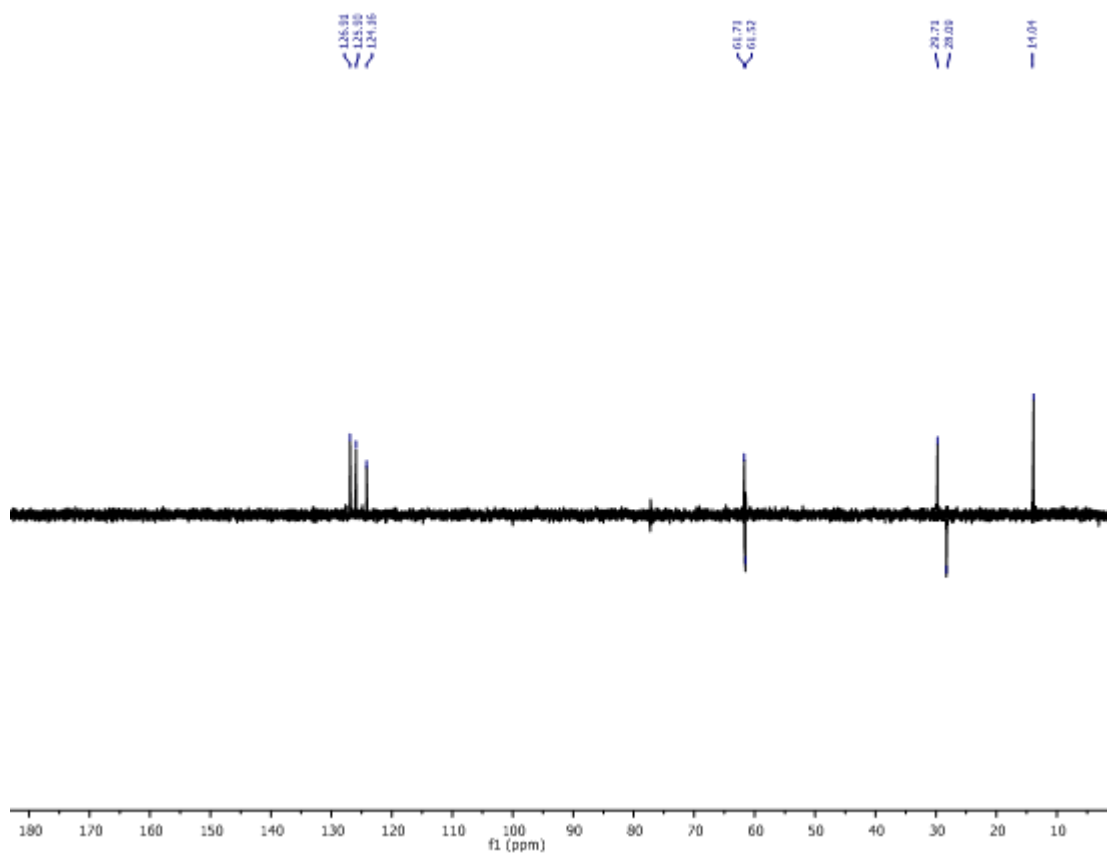

### $^1\text{H}$ NMR of compound (5a) (400 MHz, $\text{CDCl}_3$ )

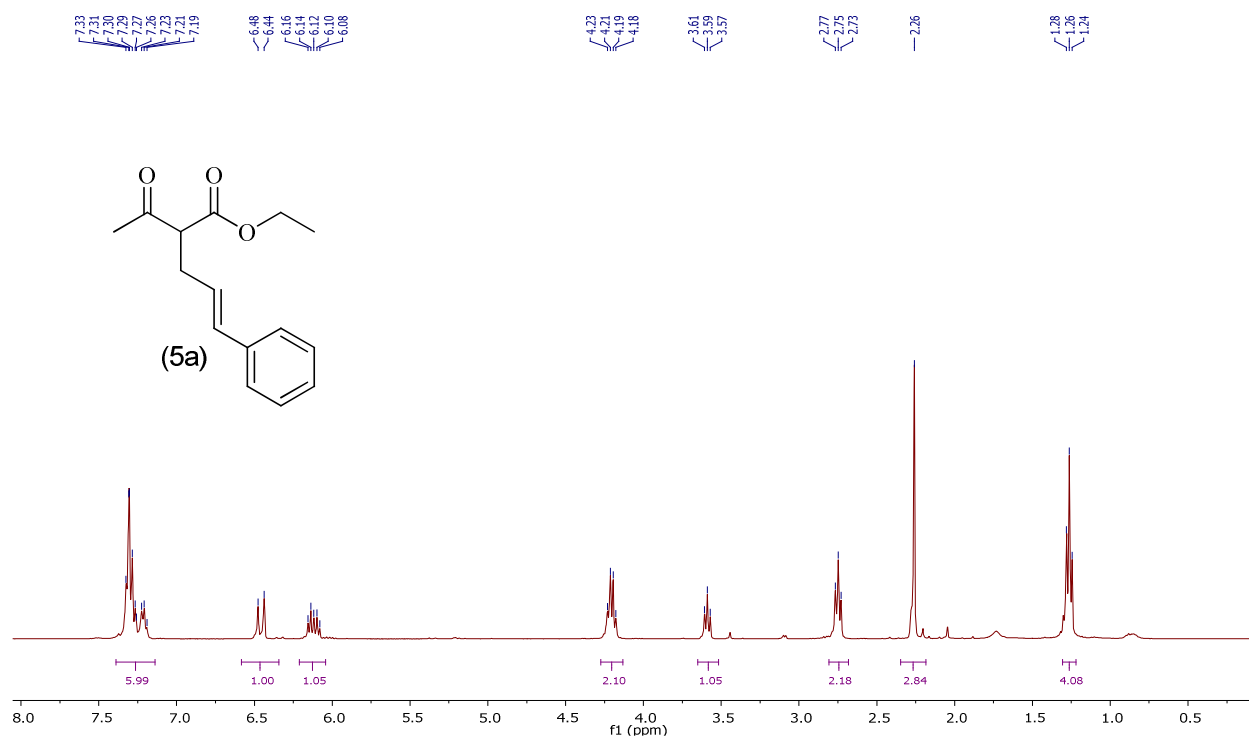

### $^{13}\text{C}$ NMR of compound (5a) (100 MHz, $\text{CDCl}_3$ )

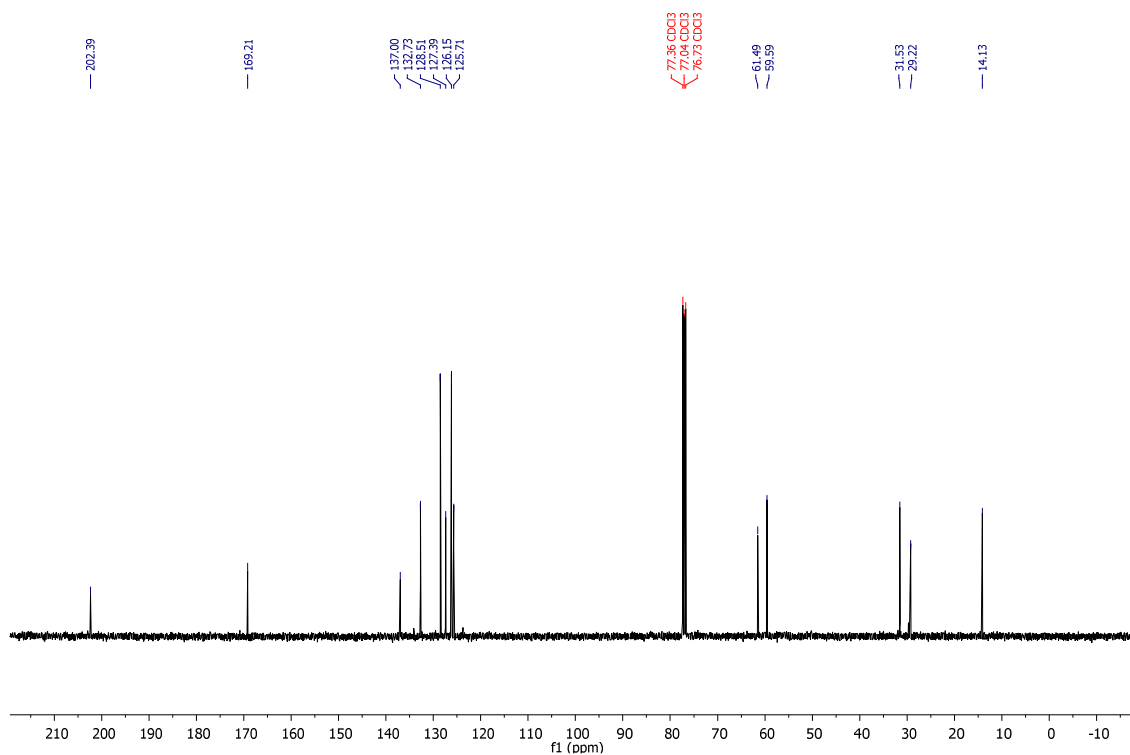

### DEPT-135 of compound (5a) (100 MHz, CDCl<sub>3</sub>)

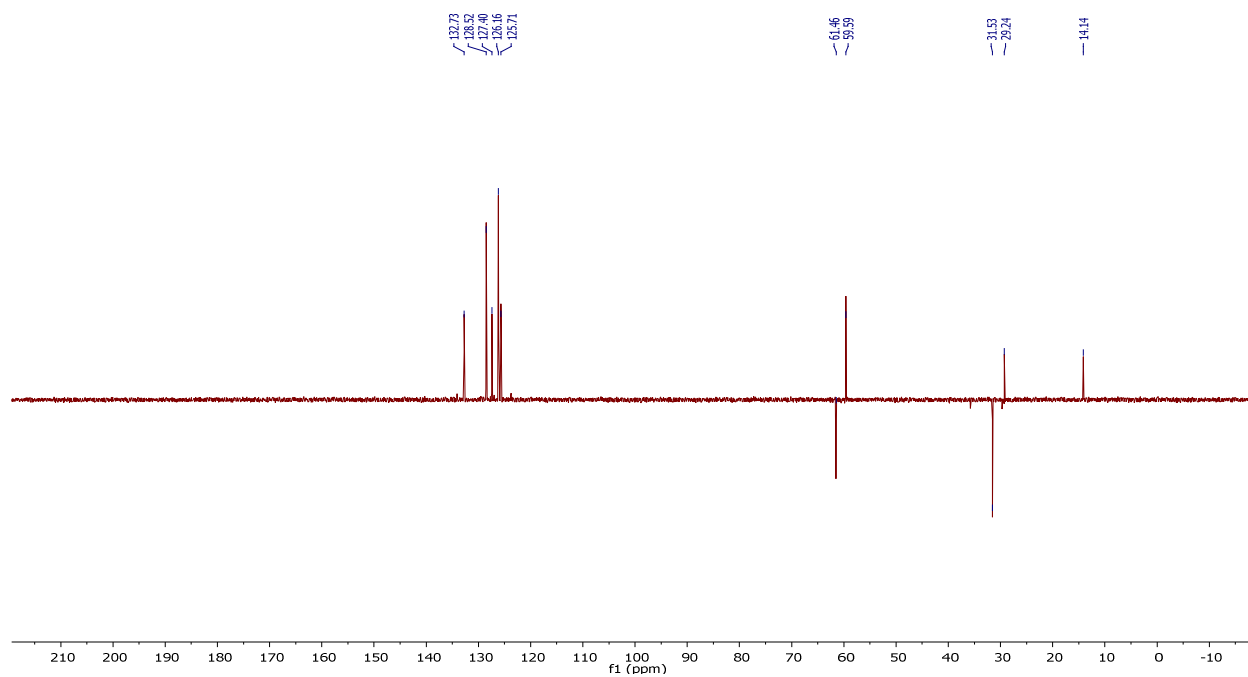

### <sup>1</sup>H NMR of compound (5b) (400 MHz, CDCl<sub>3</sub>)

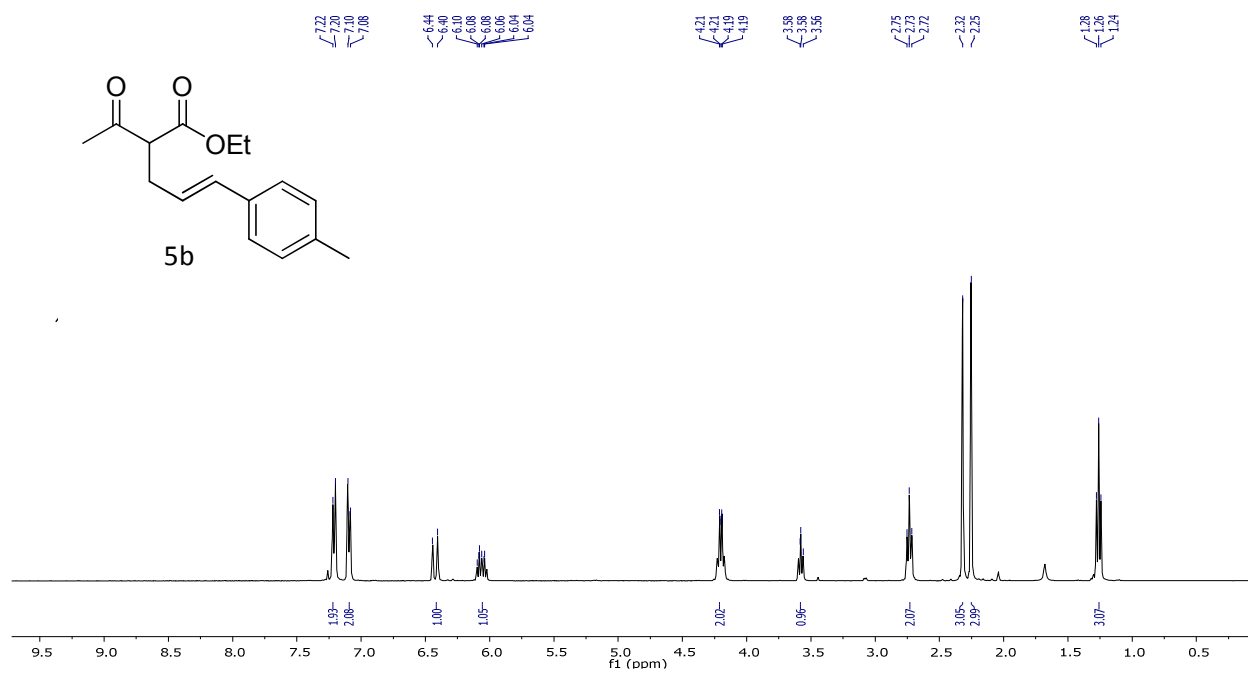

### $^{13}\text{C}$ NMR of compound (5b) (50 MHz, $\text{CDCl}_3$ )

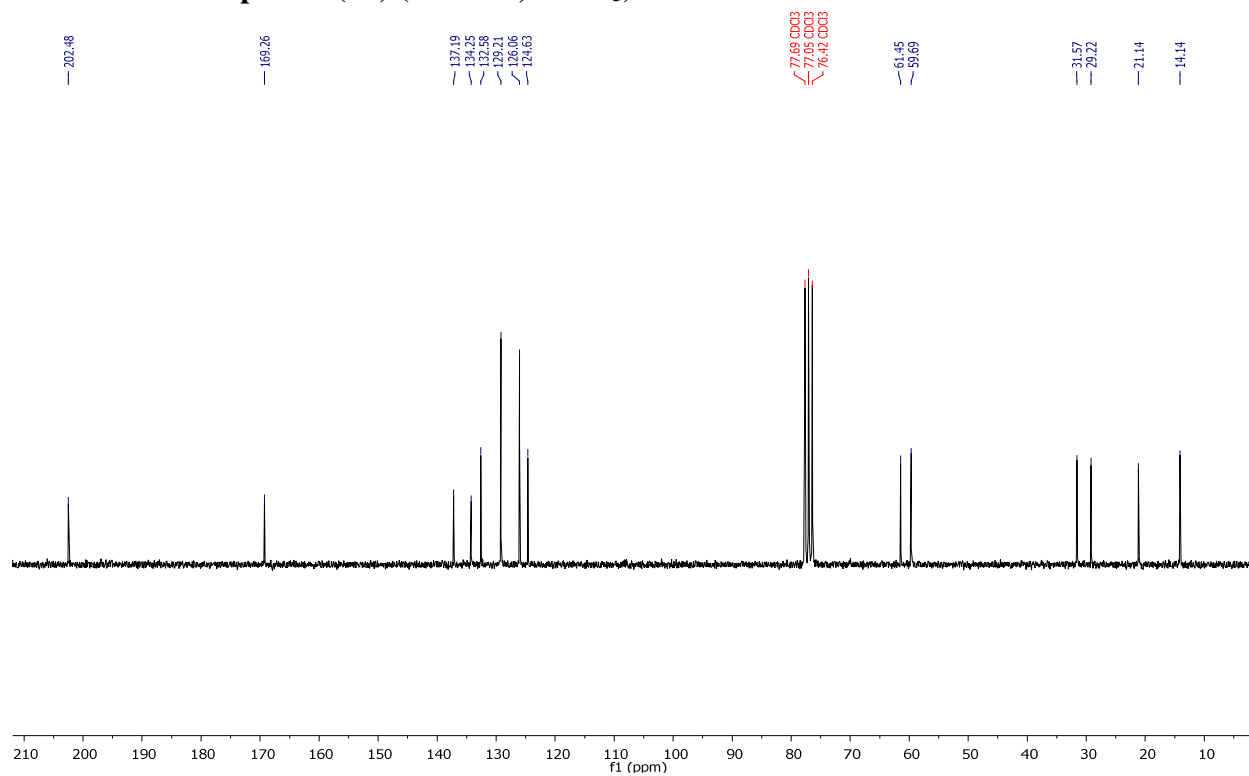

### DEPT-135 of compound (5b) (50 MHz, $\text{CDCl}_3$ )

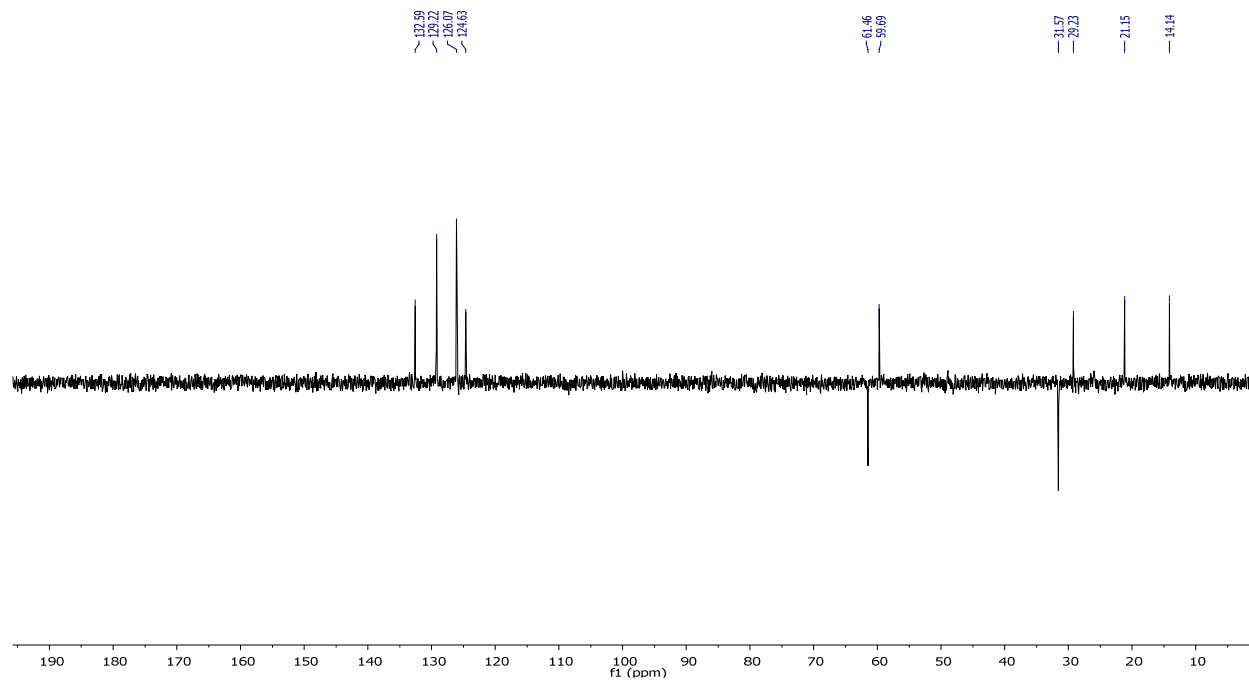

### $^1\text{H}$ NMR of compound (5c) (500 MHz, $\text{CDCl}_3$ )

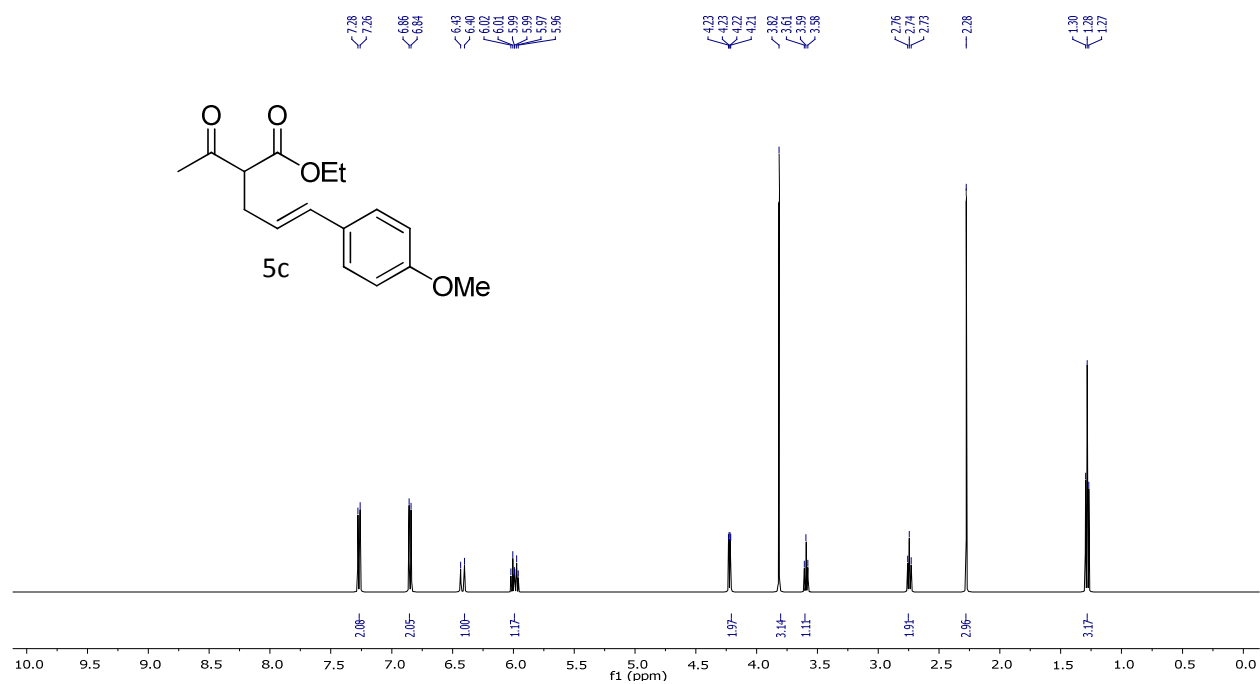

### $^{13}\text{C}$ NMR of compound (5c) (125 MHz, $\text{CDCl}_3$ )

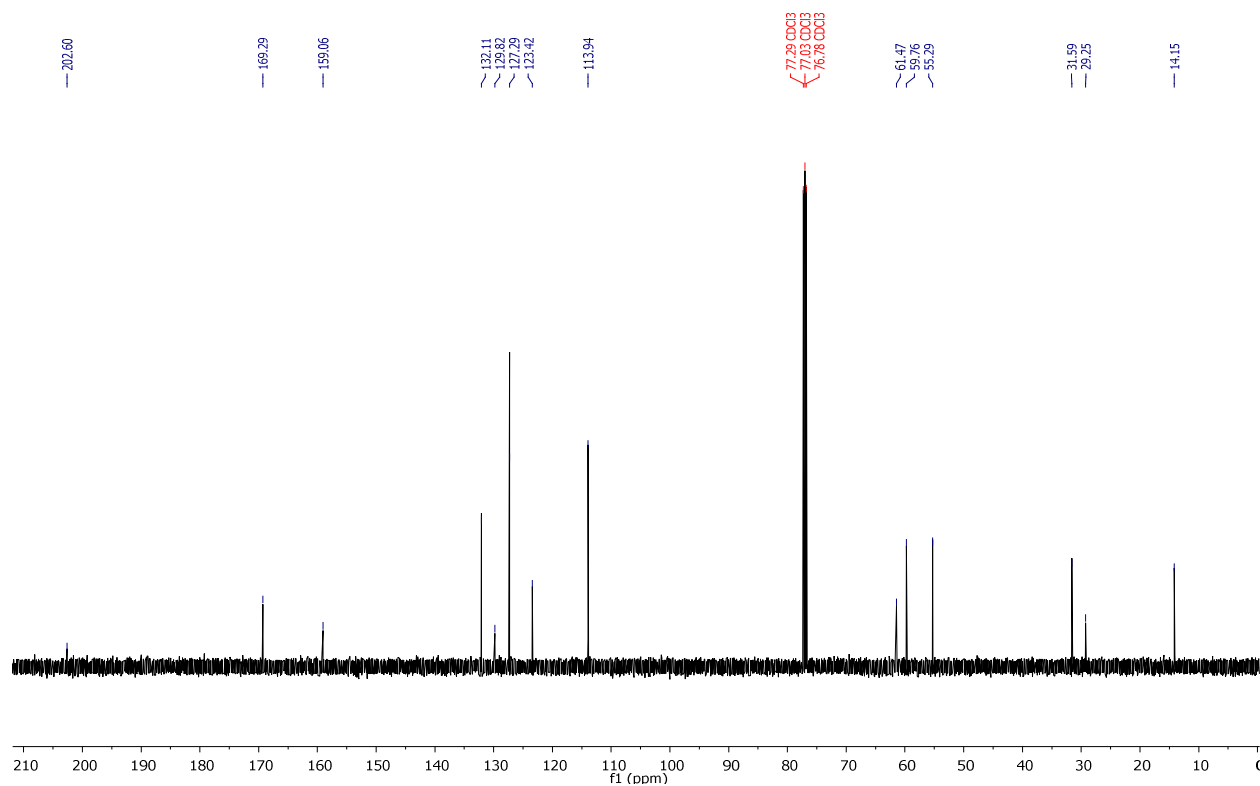

DEPT-135 of compound (5c) (125 MHz, CDCl<sub>3</sub>)

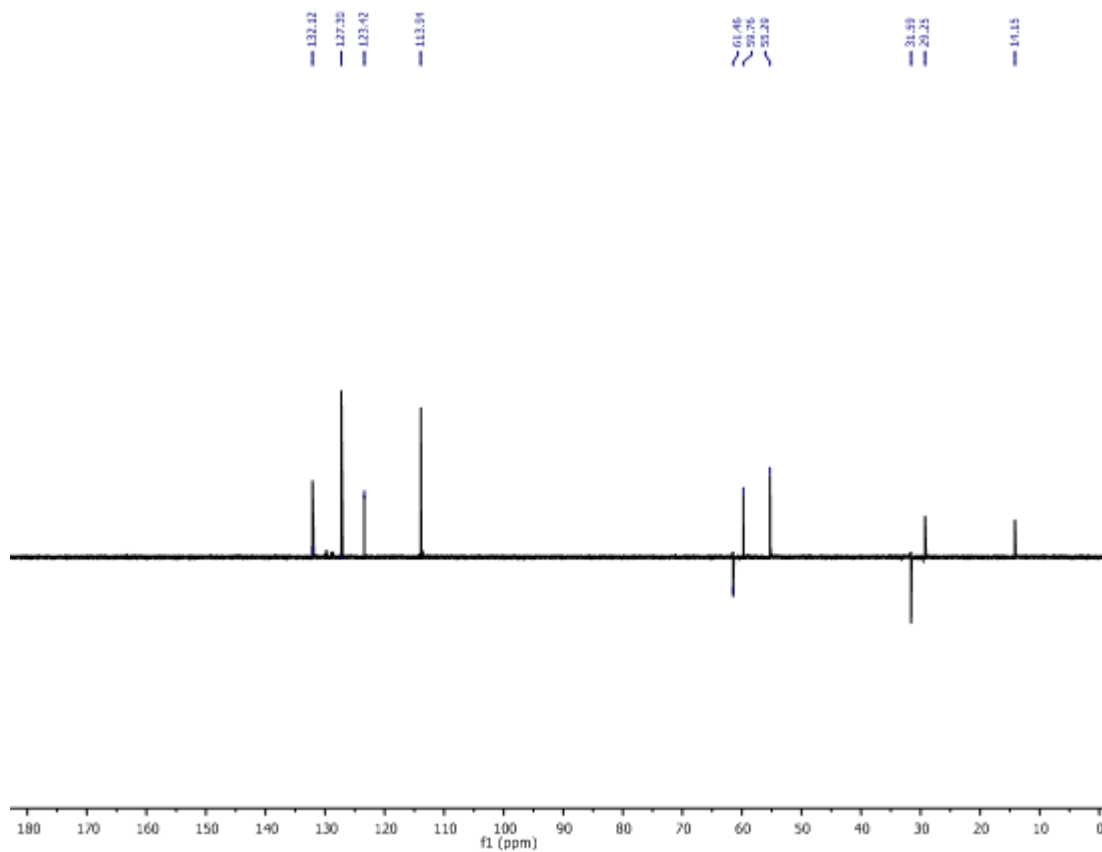

<sup>1</sup>H NMR of compound (5d) (400 MHz, CDCl<sub>3</sub>)

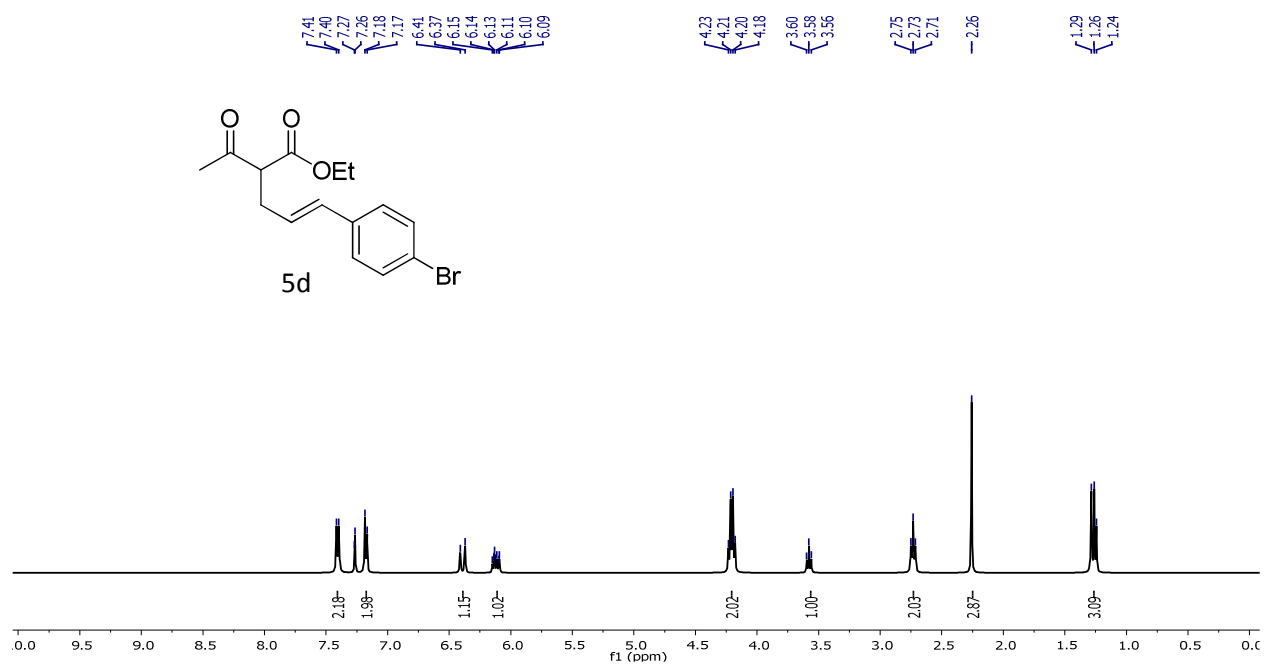

**$^{13}\text{C}$  NMR of compound (5d) (150 MHz,  $\text{CDCl}_3$ )**

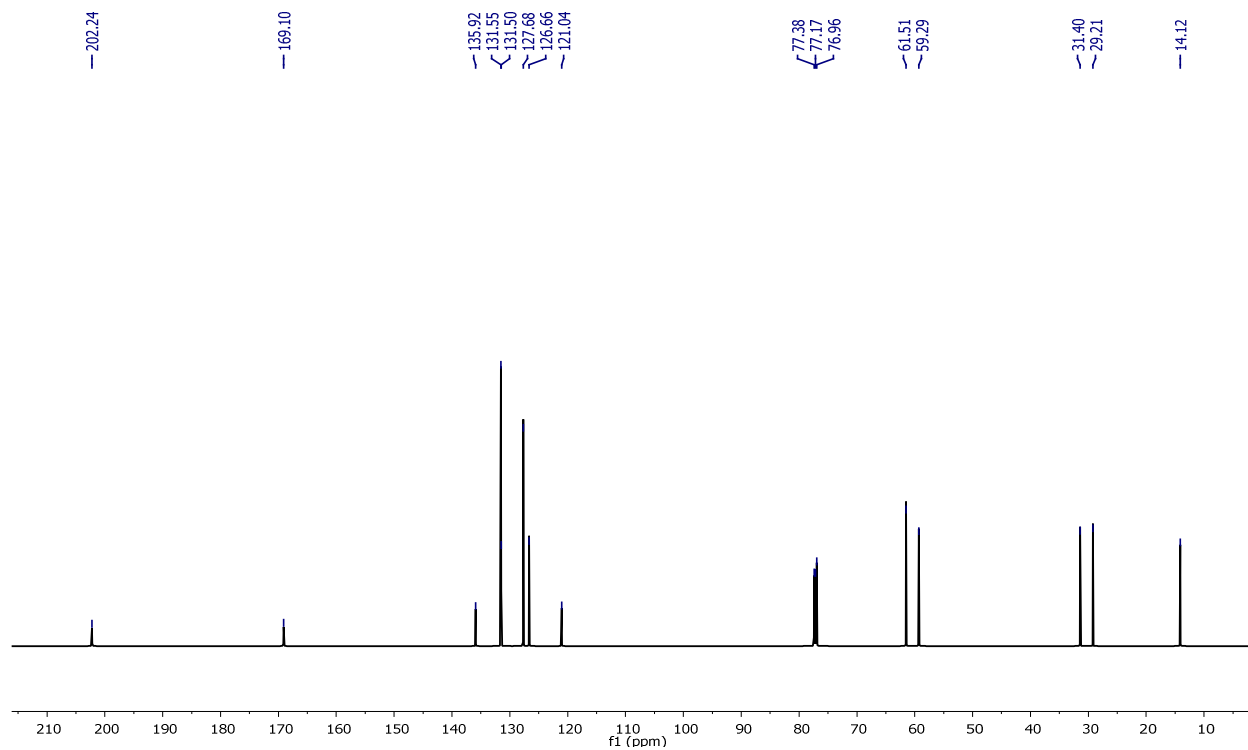

**DEPT-135 of compound (5d) (150 MHz,  $\text{CDCl}_3$ )**

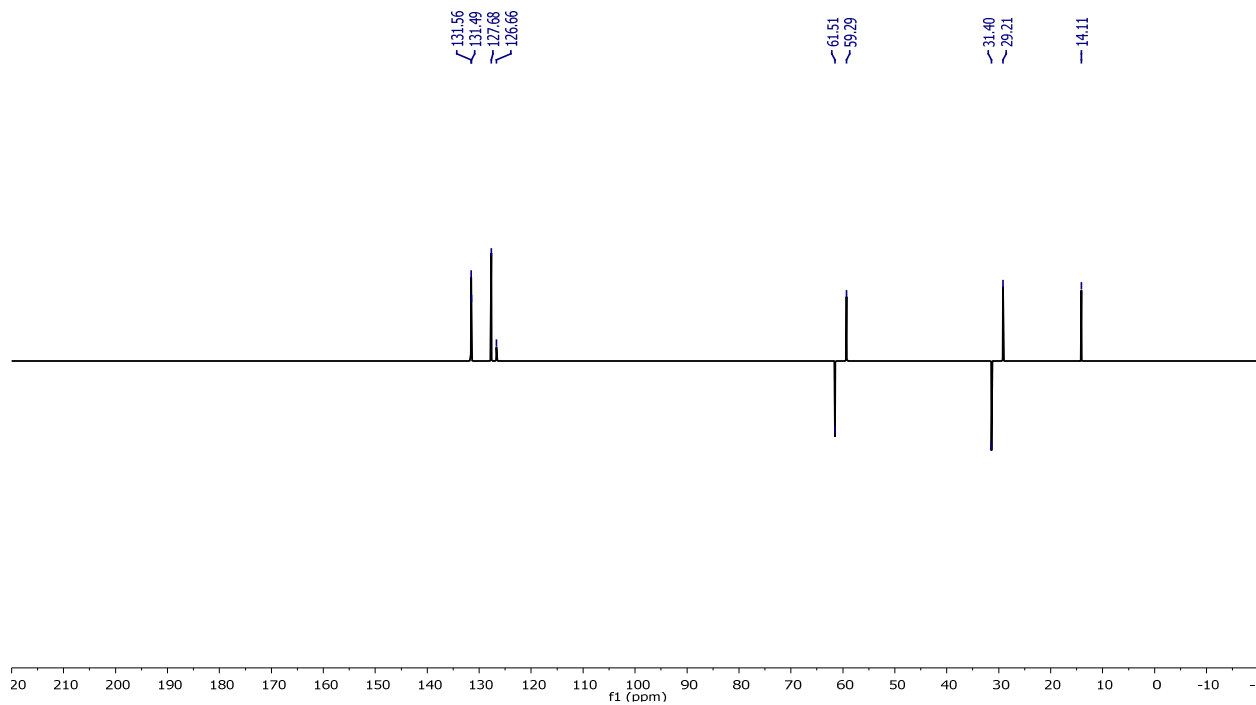

### $^1\text{H}$ NMR of compound (5e) (400 MHz, $\text{CDCl}_3$ )

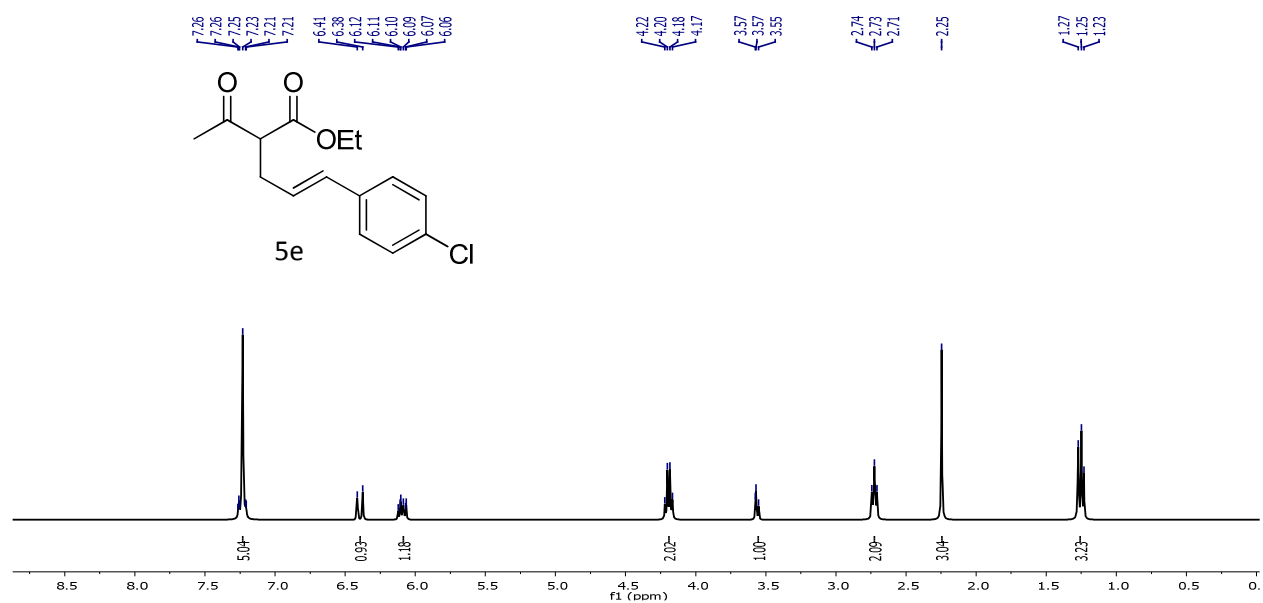

### $^{13}\text{C}$ NMR of compound (5e) (100 MHz, $\text{CDCl}_3$ )

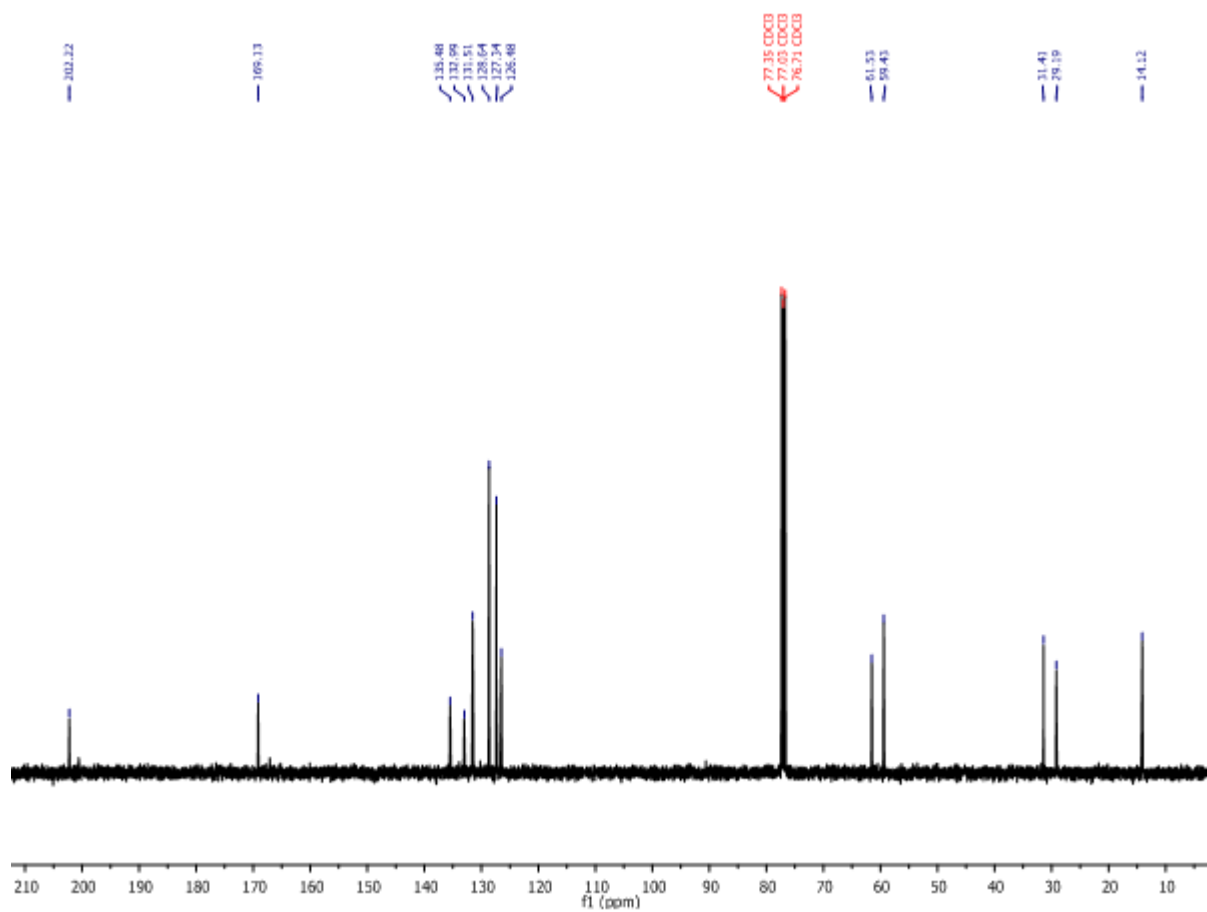



DEPT-135 of compound (5e) (100 MHz, CDCl<sub>3</sub>)

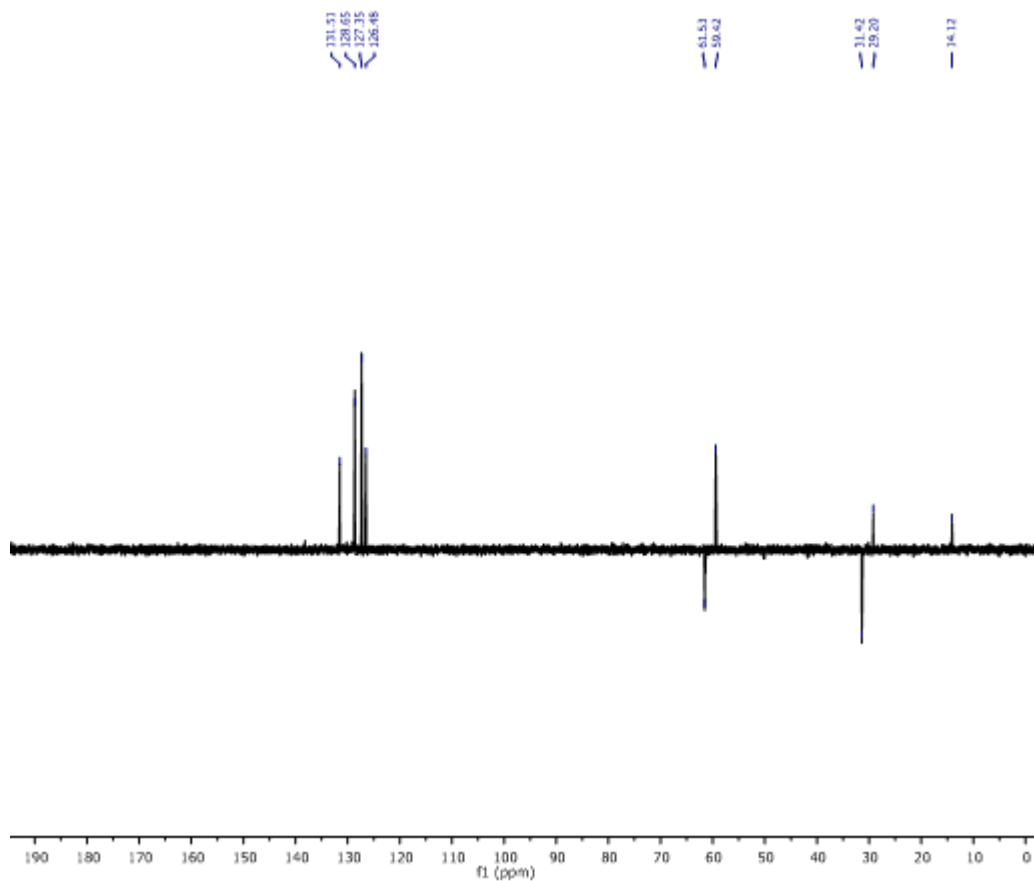

<sup>1</sup>H NMR of compound (5f) (400 MHz, CDCl<sub>3</sub>)

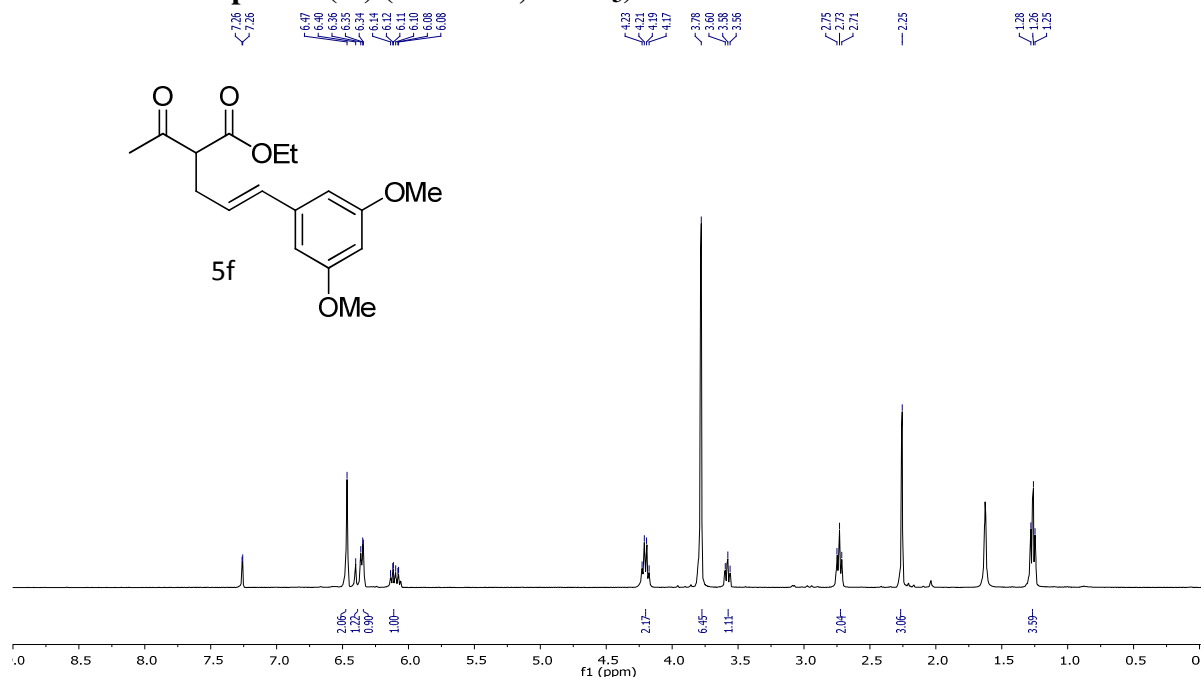

### $^{13}\text{C}$ NMR of compound (5f) (100 MHz, $\text{CDCl}_3$ )

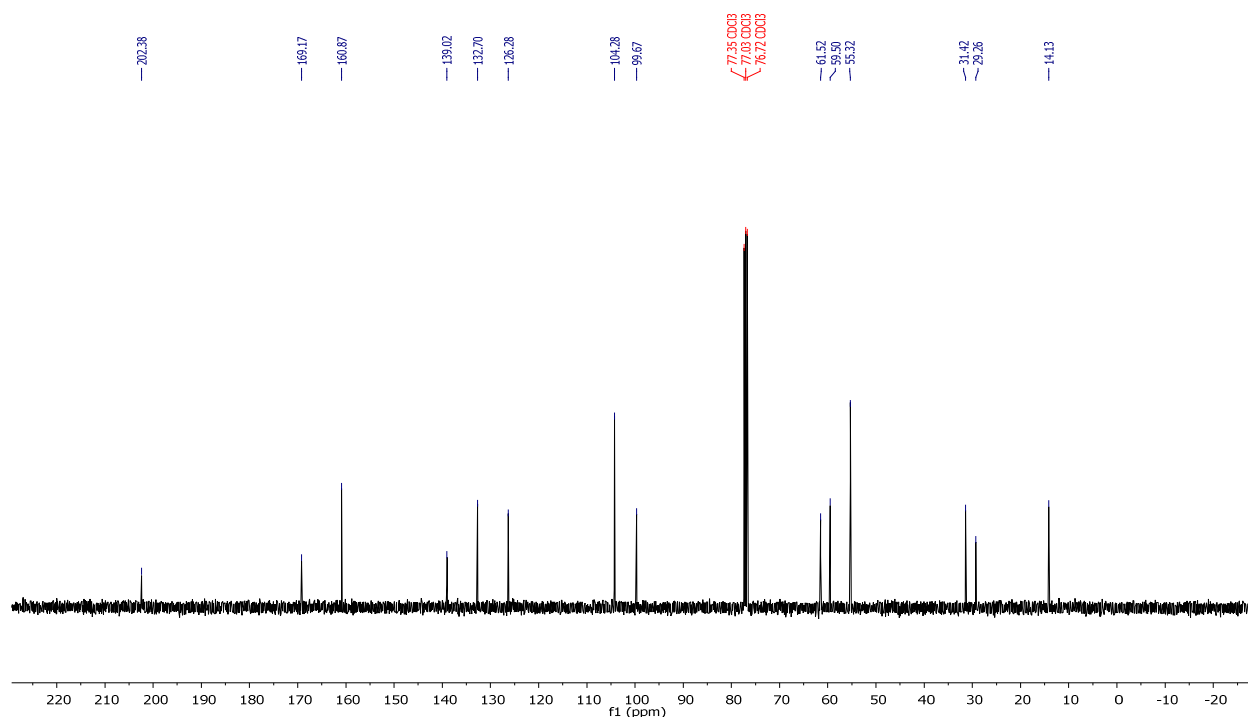

### DEPT-135 of compound (5f) (100 MHz, $\text{CDCl}_3$ )

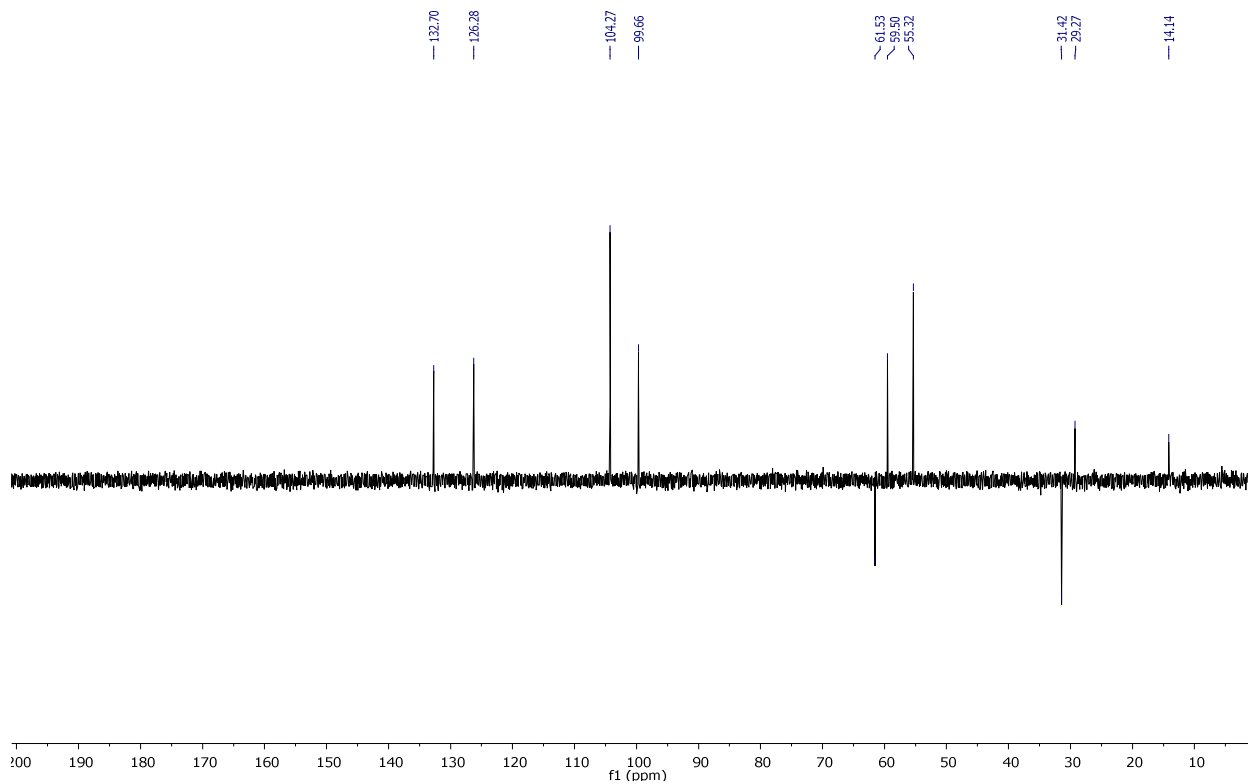

# <sup>1</sup>H NMR of compound (5g) (400 MHz, CDCl<sub>3</sub>)

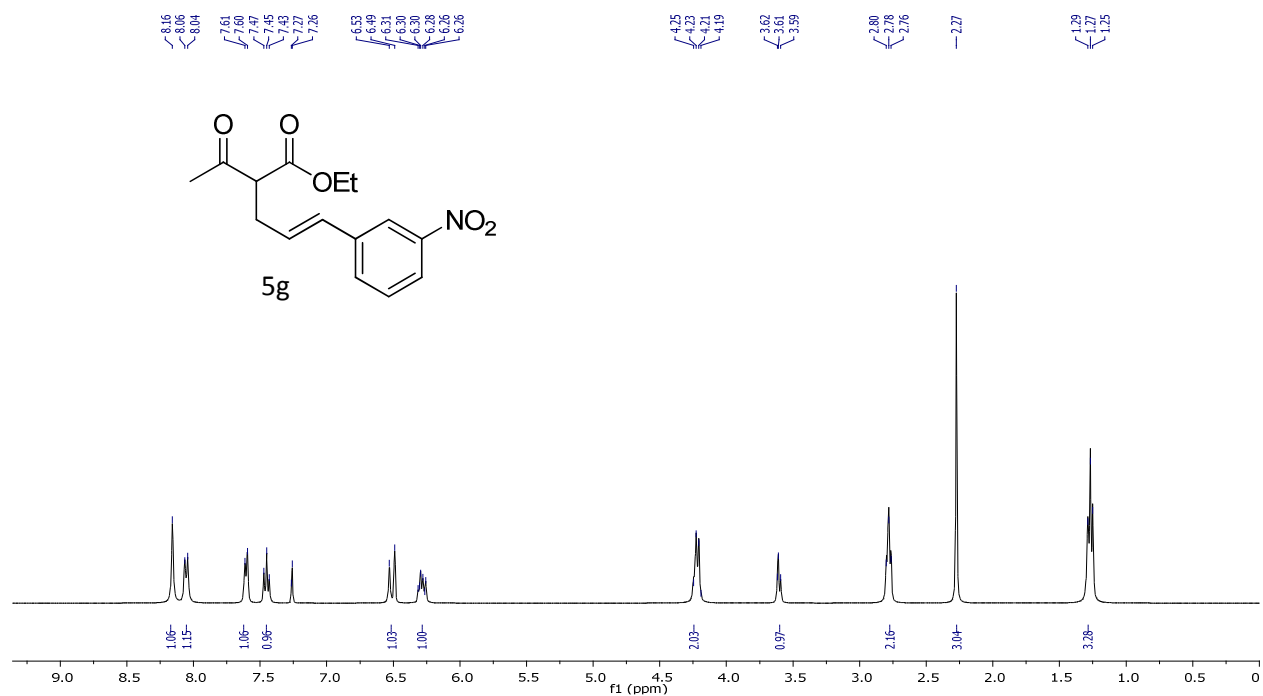

# <sup>13</sup>C NMR of compound (5g) (100 MHz, CDCl<sub>3</sub>)

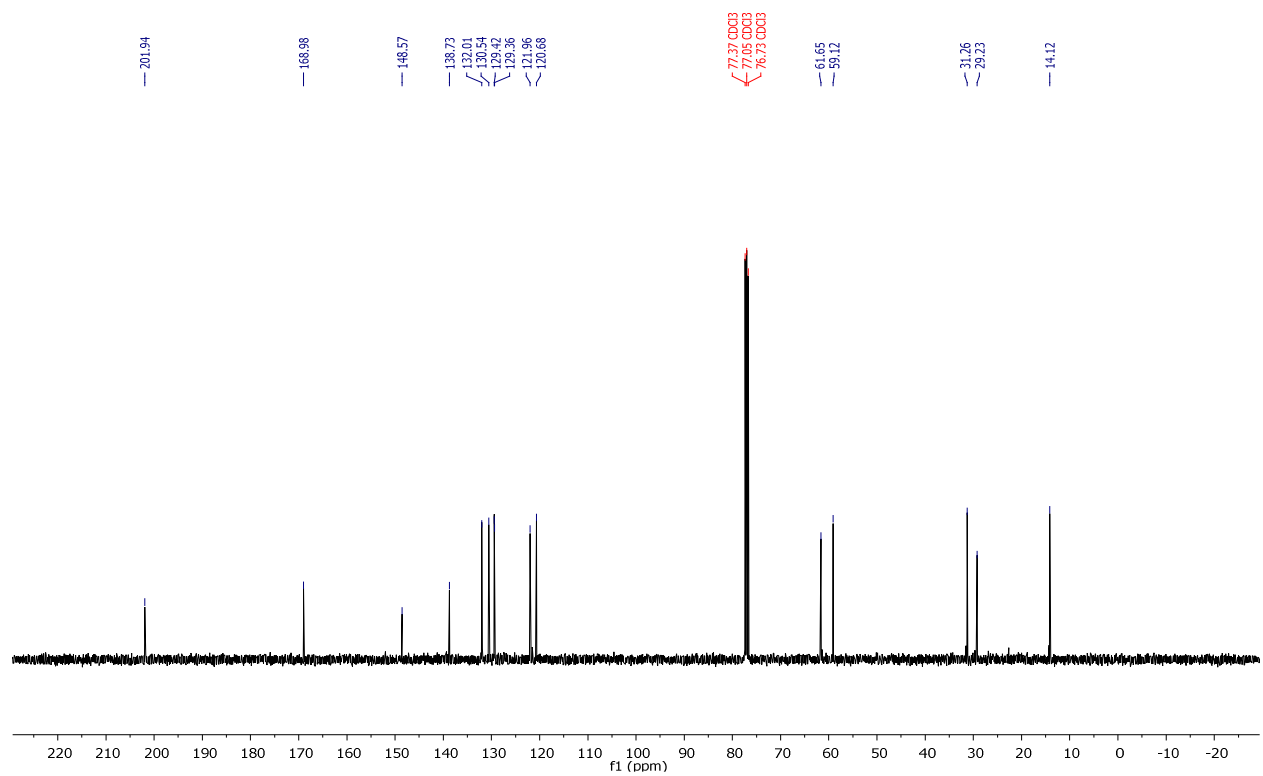

### DEPT-135 of compound (5g) (100 MHz, CDCl<sub>3</sub>)

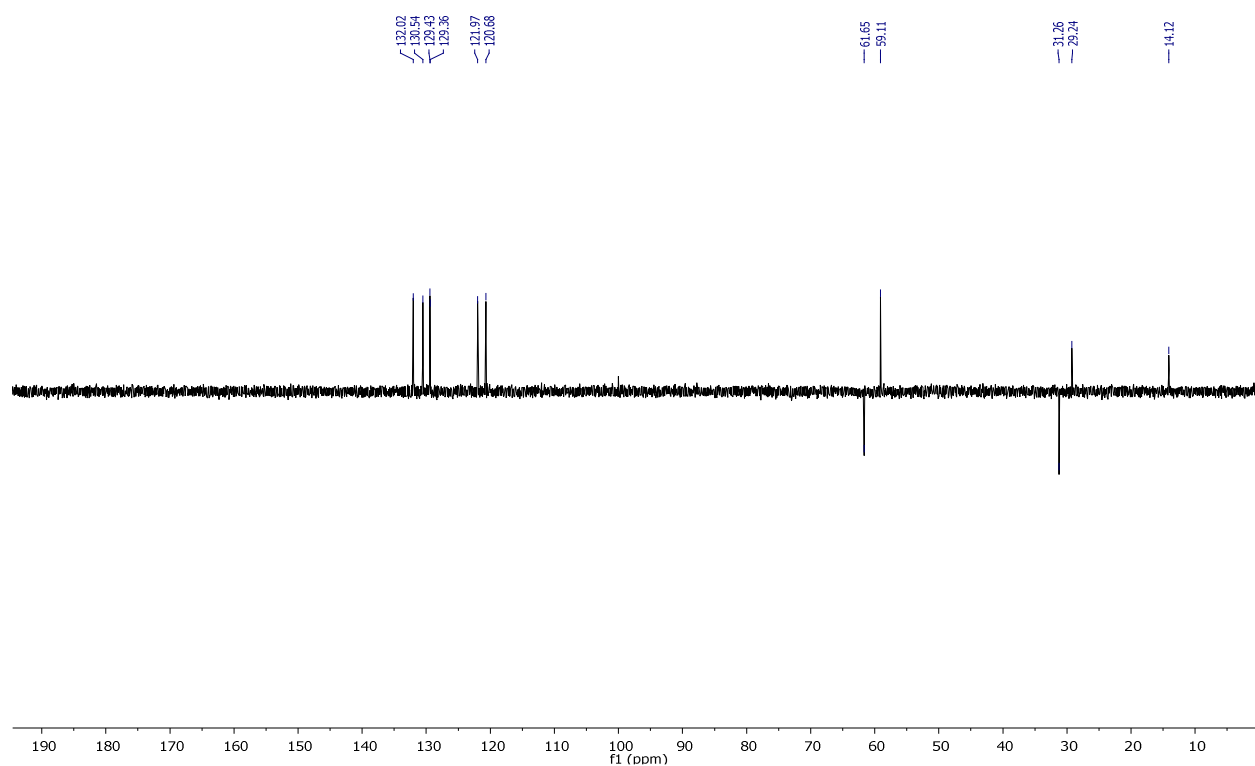

### <sup>1</sup>H NMR of compound (5h) (400 MHz, CDCl<sub>3</sub>)

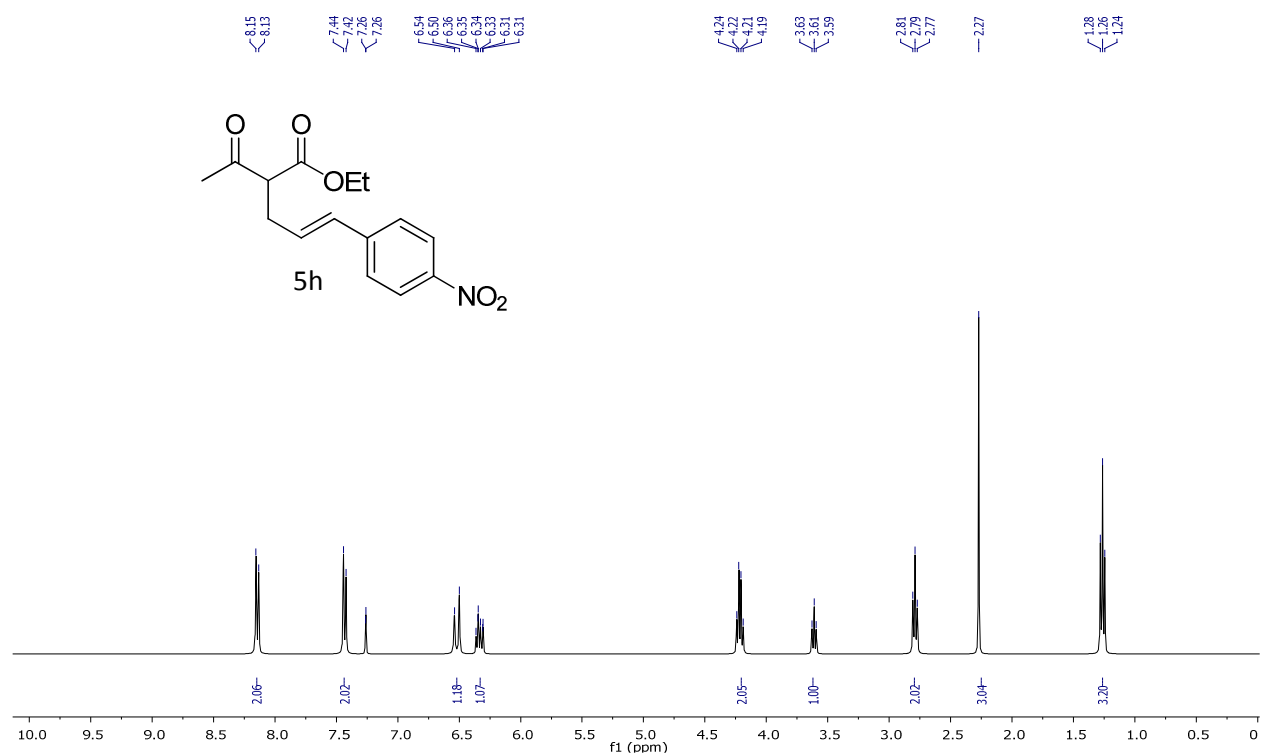

### $^{13}\text{C}$ NMR of compound (5h) (100 MHz, $\text{CDCl}_3$ )

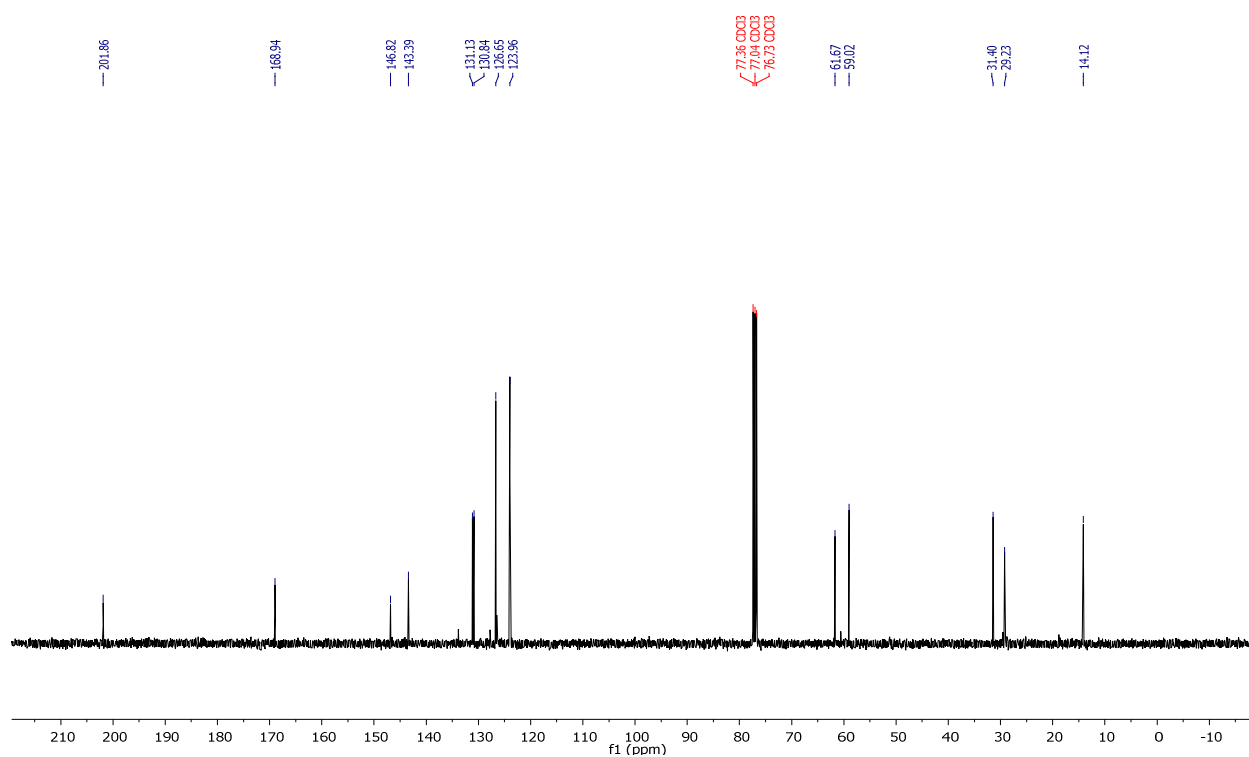

### DEPT-135 of compound (5h) (100 MHz, $\text{CDCl}_3$ )

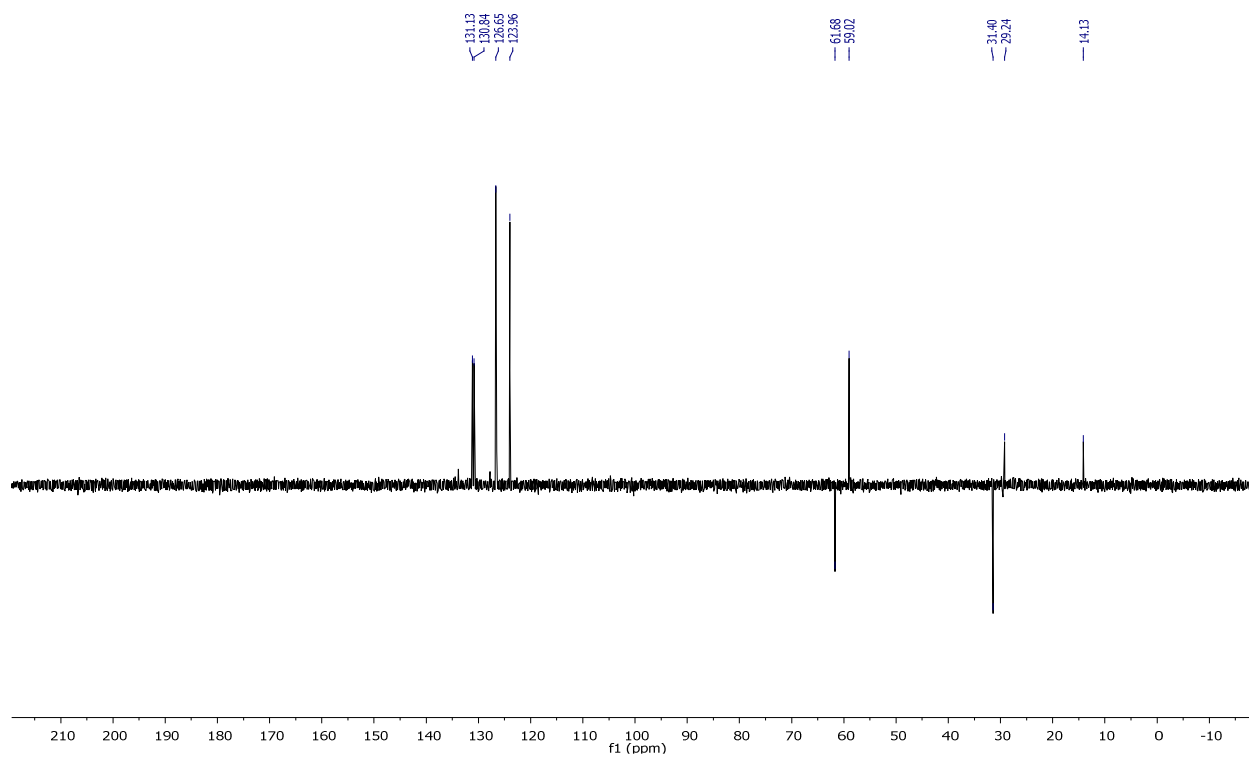

### $^1\text{H}$ NMR of compound (5i) (400 MHz, $\text{CDCl}_3$ )

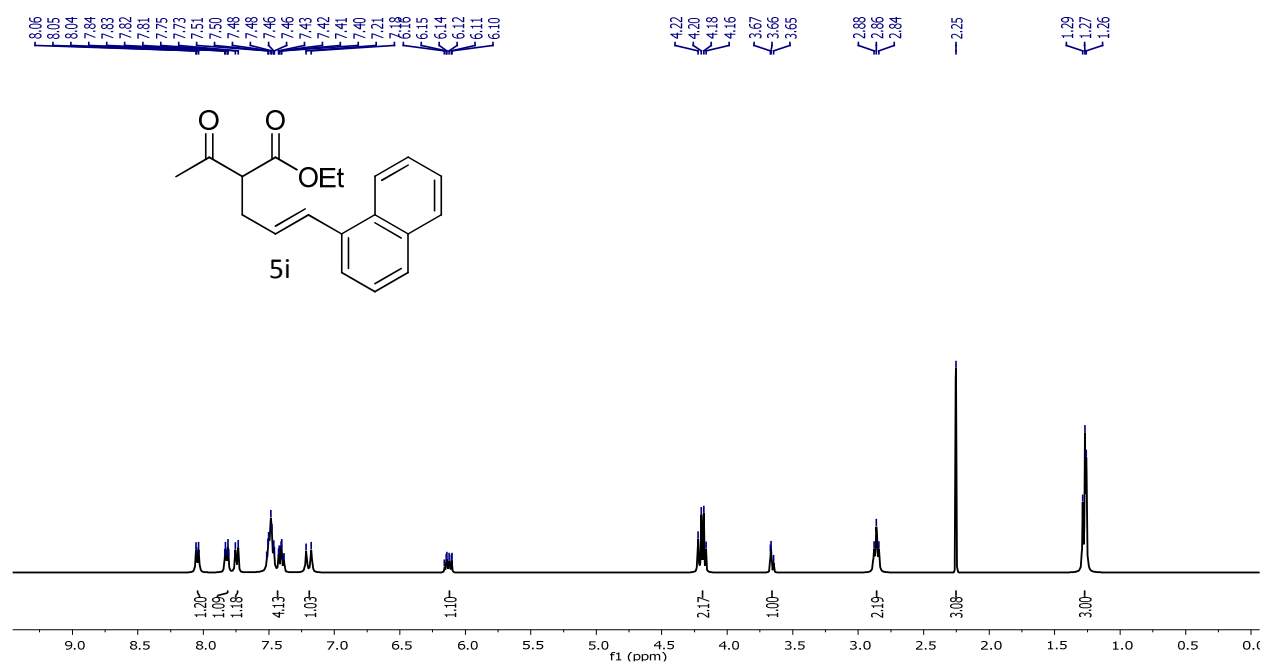

### $^{13}\text{C}$ NMR of compound (5i) (100 MHz, $\text{CDCl}_3$ )

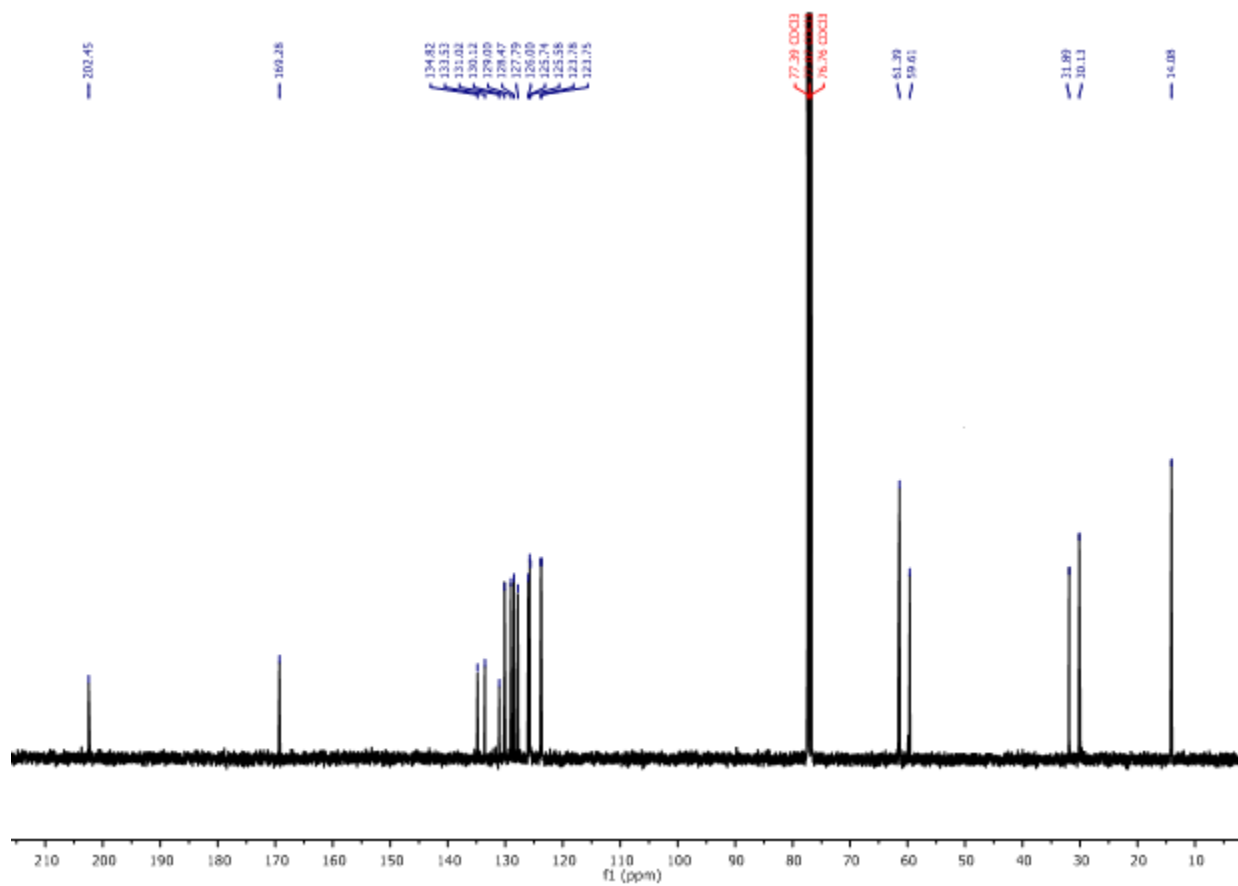

DEPT-135 of compound (5i) (100 MHz, CDCl<sub>3</sub>)

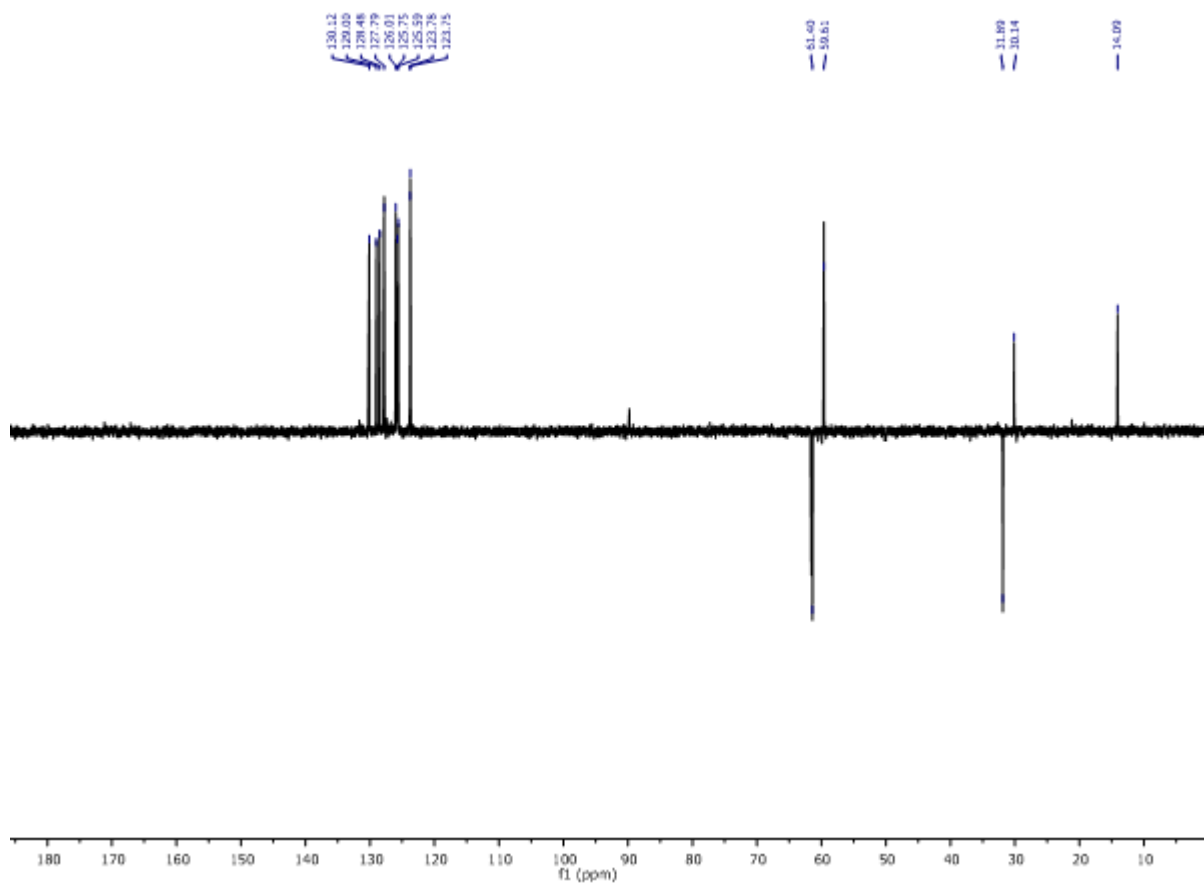

<sup>1</sup>H NMR of compound (5j) (600 MHz, CDCl<sub>3</sub>)

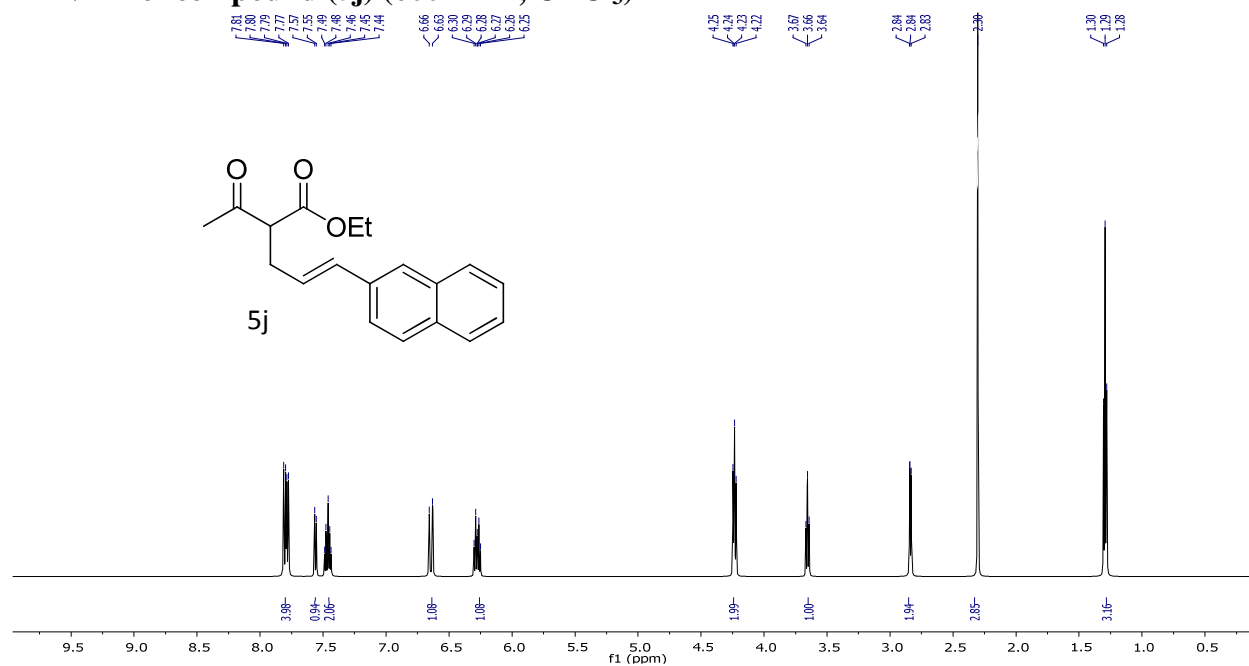

### $^{13}\text{C}$ NMR of compound (5j) (150 MHz, $\text{CDCl}_3$ )

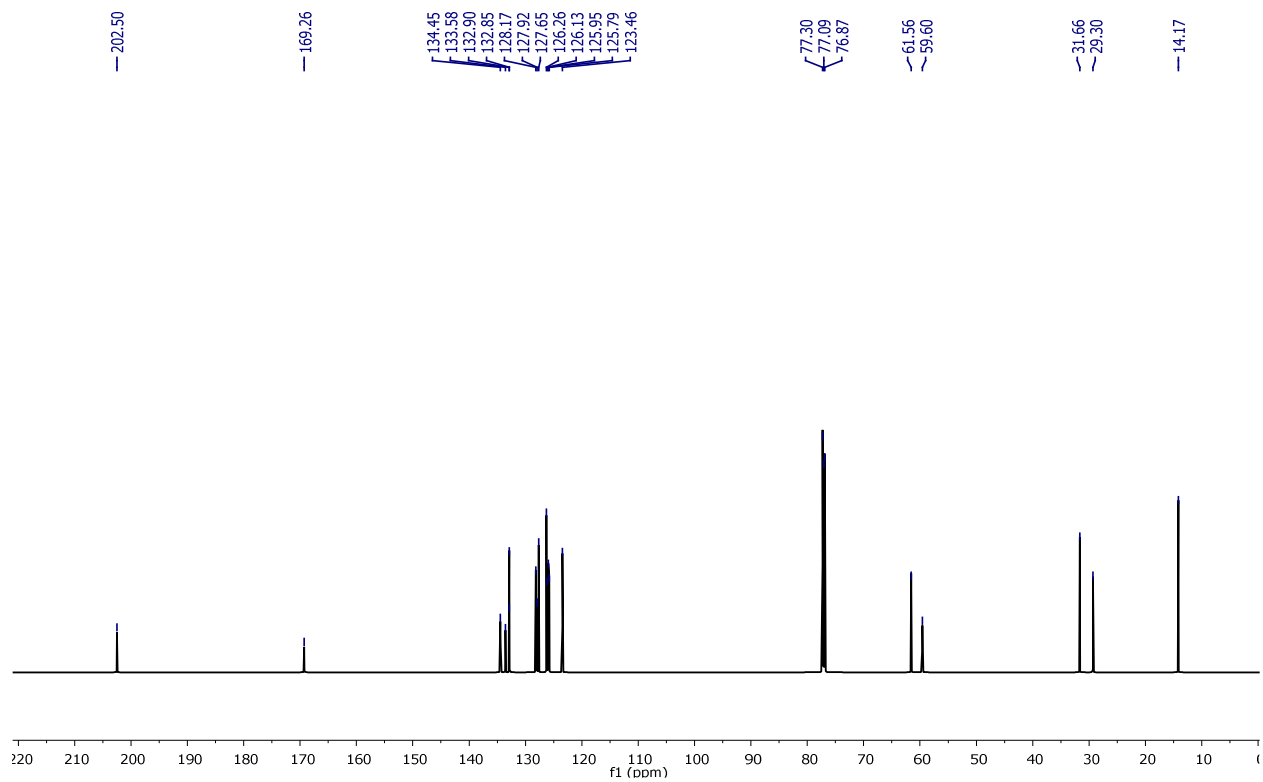

### DEPT-135 of compound (5j) (150 MHz, $\text{CDCl}_3$ )

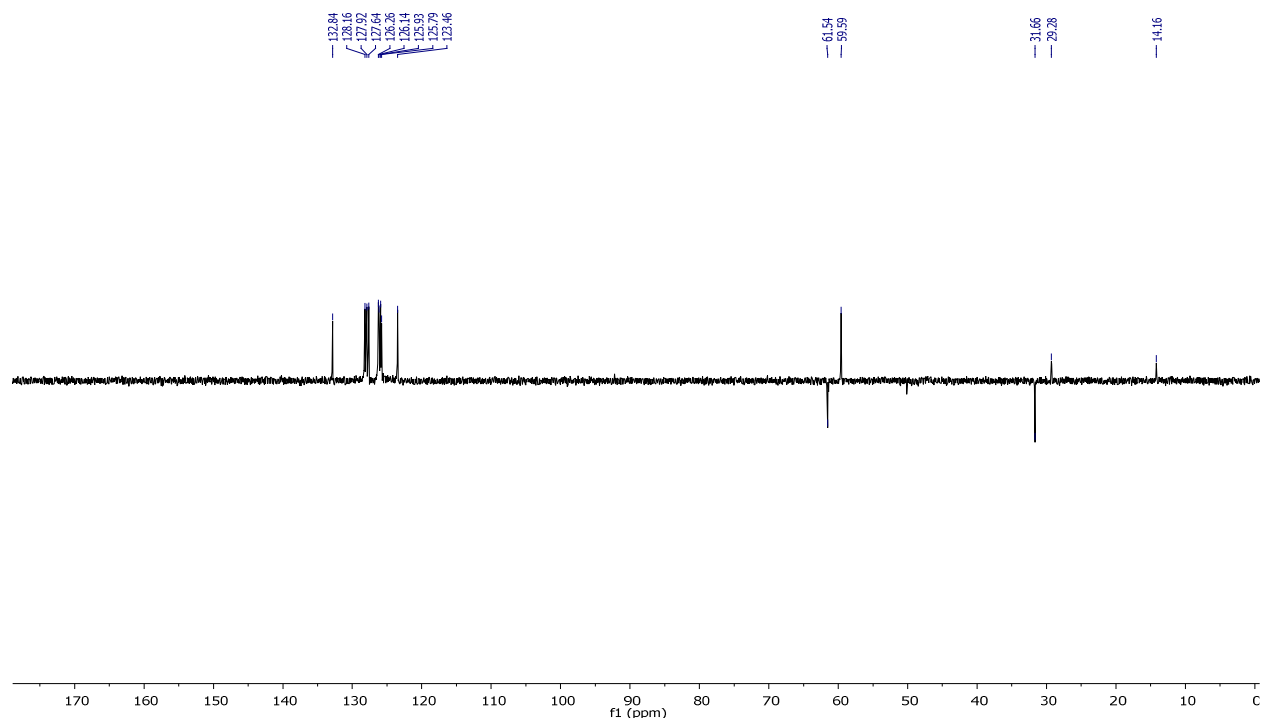



<sup>1</sup>H NMR of compound (5k) (600 MHz, CDCl<sub>3</sub>)

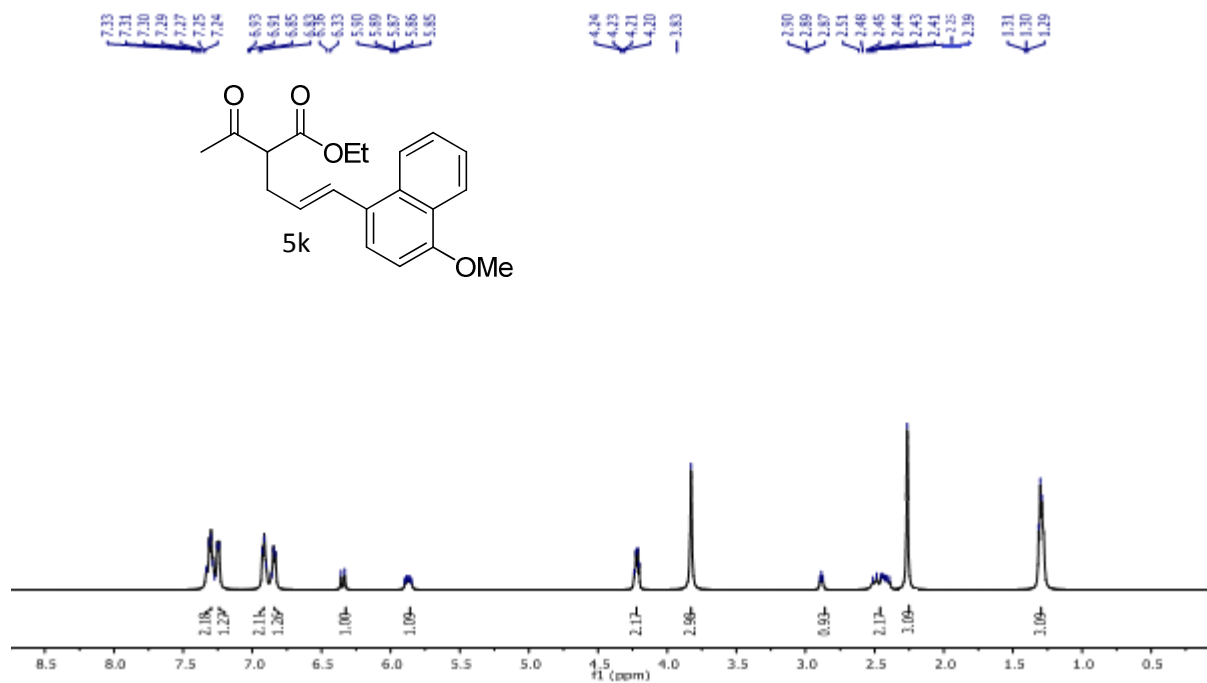

<sup>13</sup>C NMR of compound (5k) (150 MHz, CDCl<sub>3</sub>)

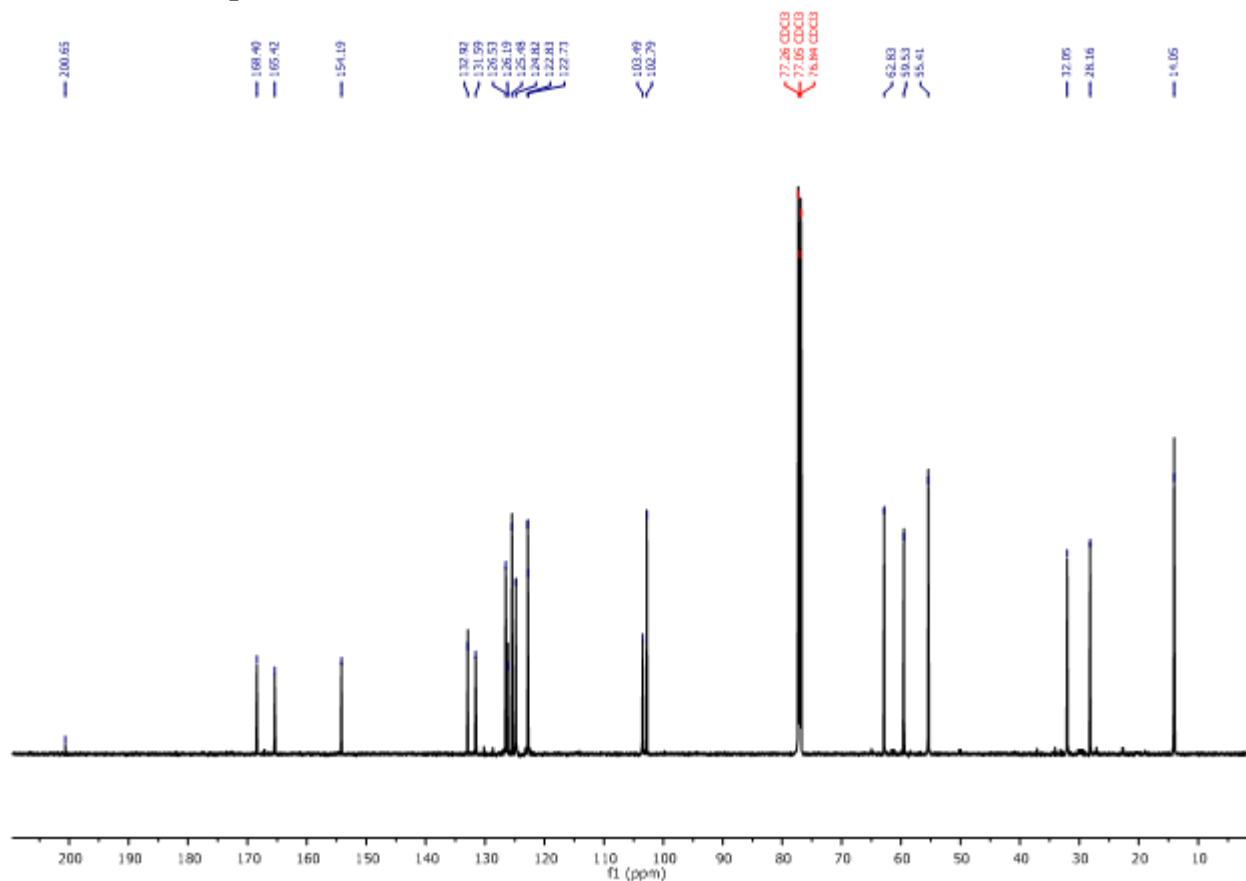

### DEPT-135 of compound (5k) (100 MHz, CDCl<sub>3</sub>)

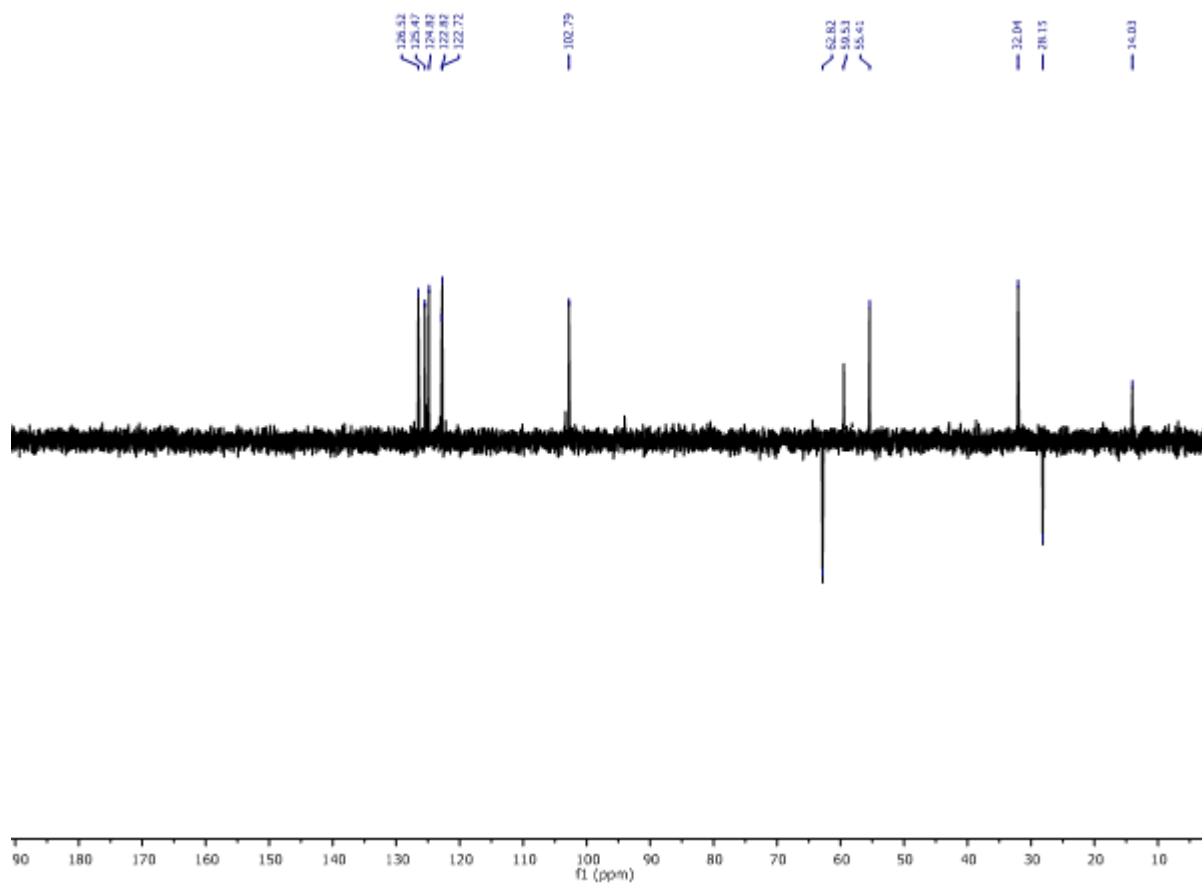

### <sup>1</sup>H NMR of compound (5l) (400 MHz, CDCl<sub>3</sub>)

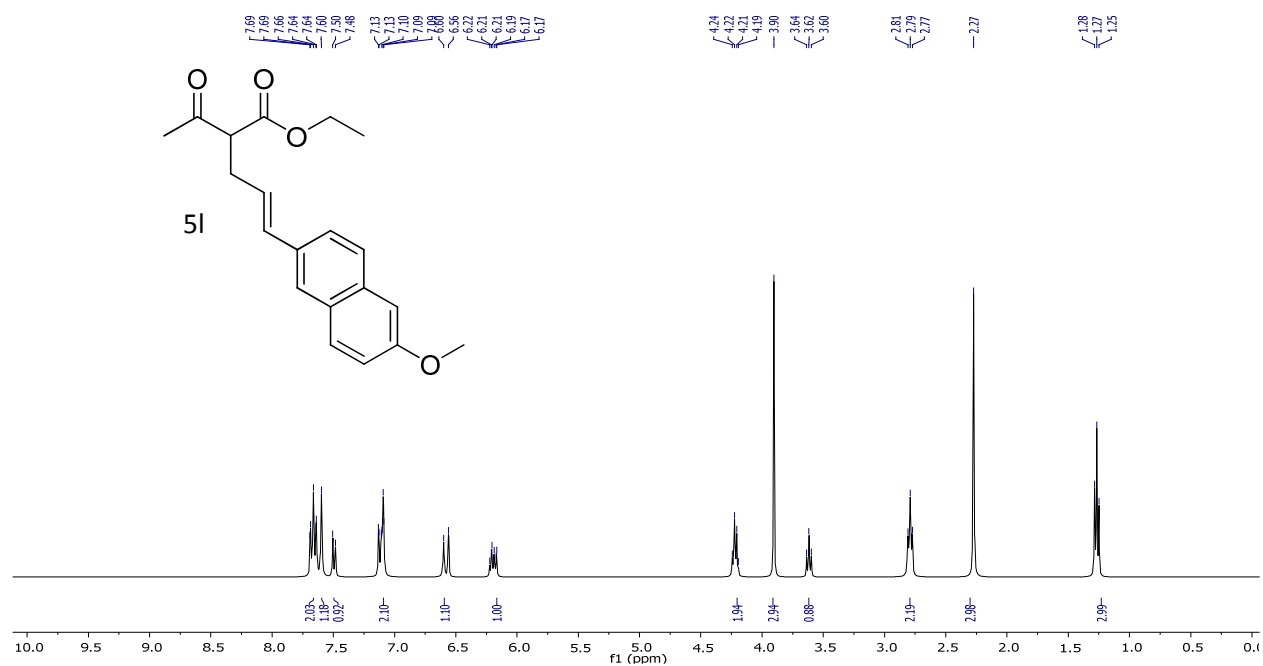

**$^{13}\text{C}$  NMR of compound (5l) (100 MHz,  $\text{CDCl}_3$ )**

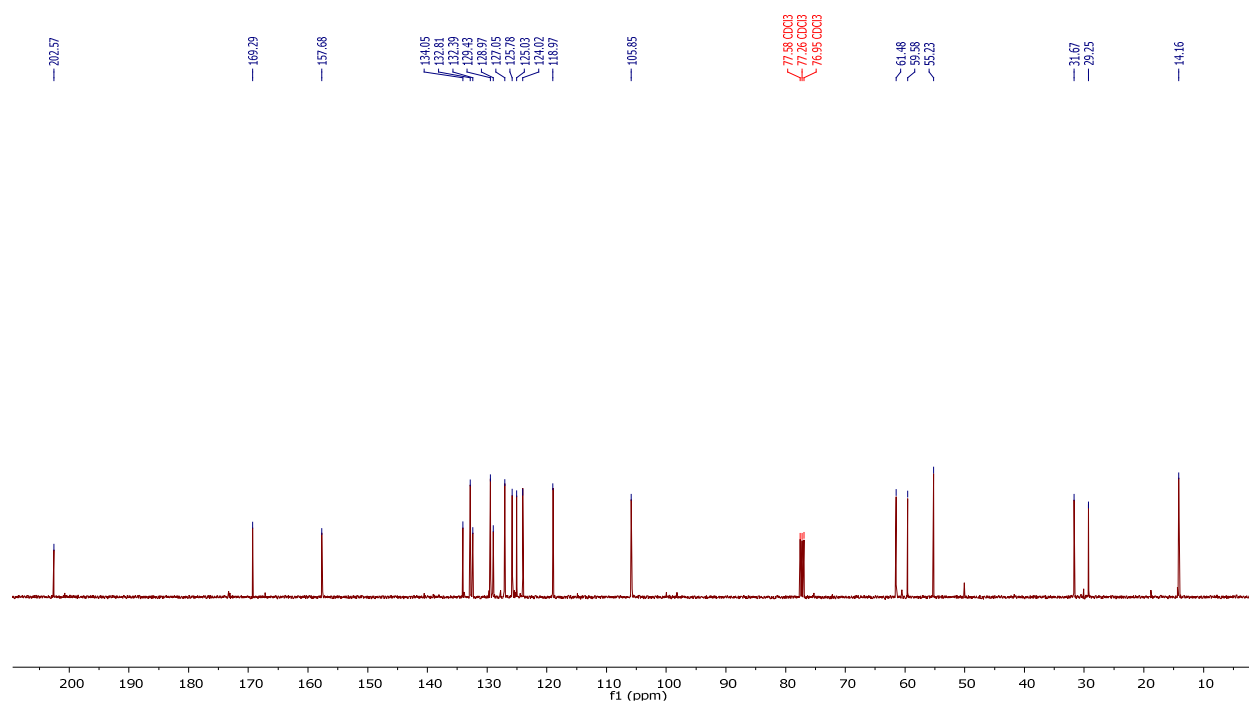

**DEPT-135 of compound (5l) (100 MHz,  $\text{CDCl}_3$ )**

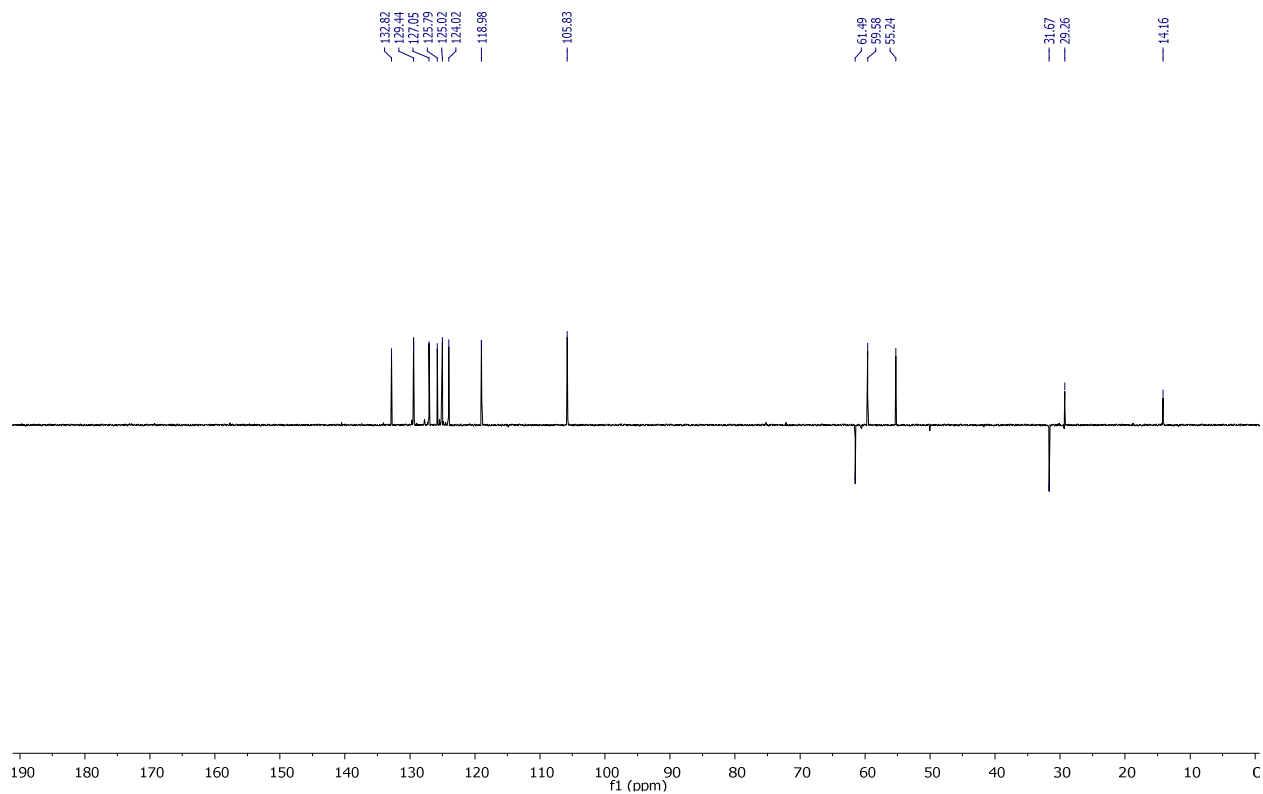

# <sup>1</sup>H NMR of compound (5m) (600 MHz, CDCl<sub>3</sub>)

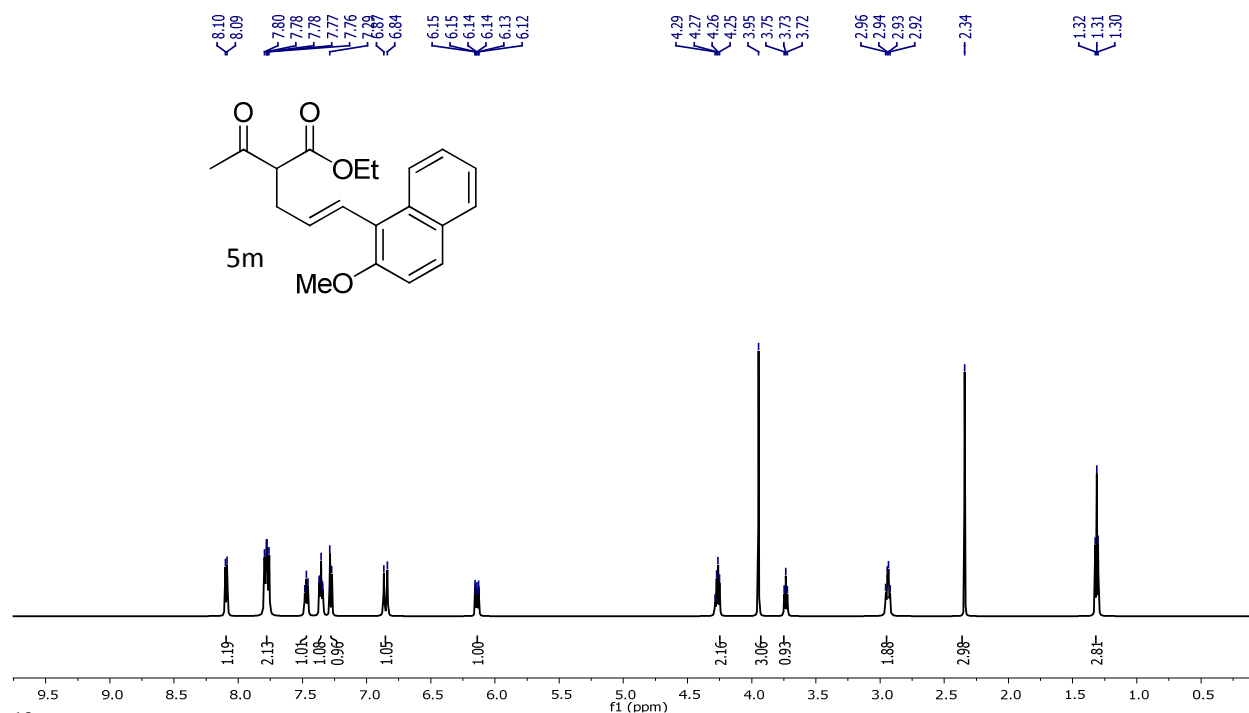

# <sup>13</sup>C NMR of compound (5m) (150 MHz, CDCl<sub>3</sub>)

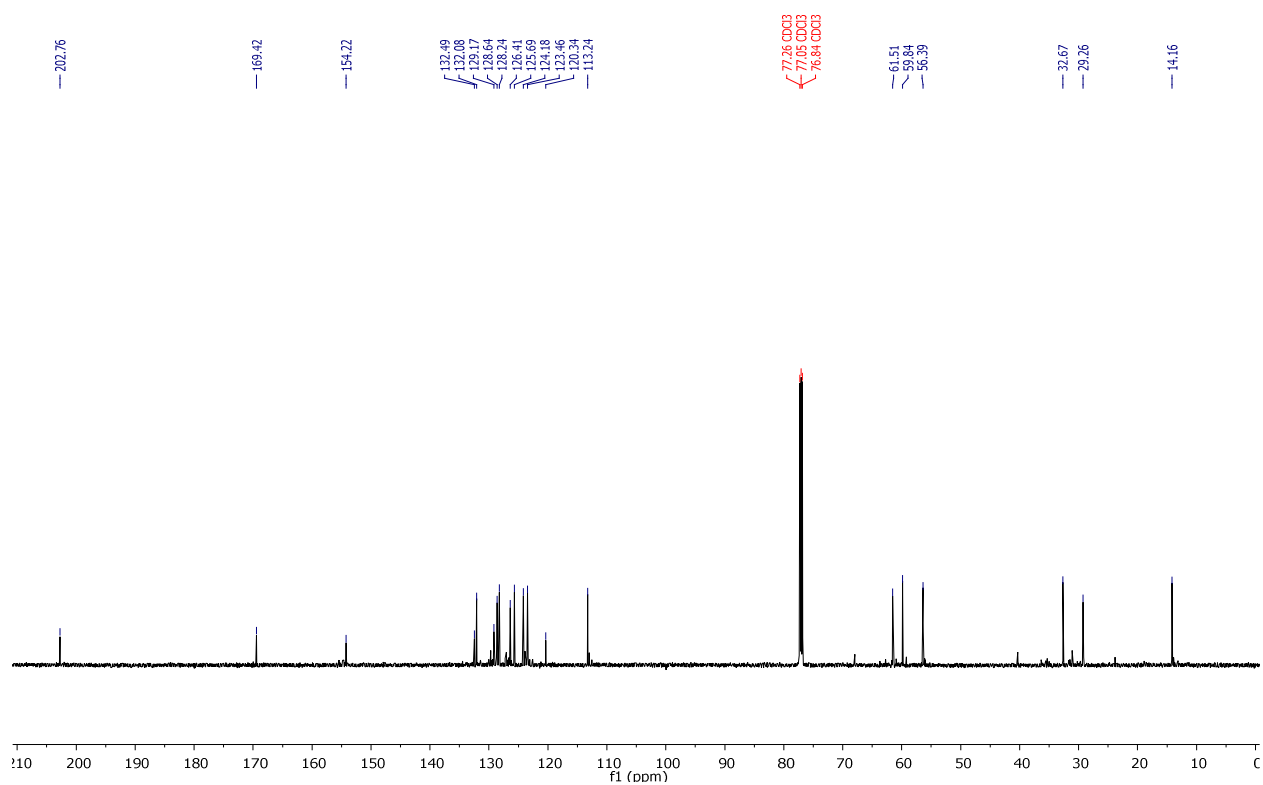

DEPT-135 of compound (5m) (150 MHz, CDCl<sub>3</sub>)

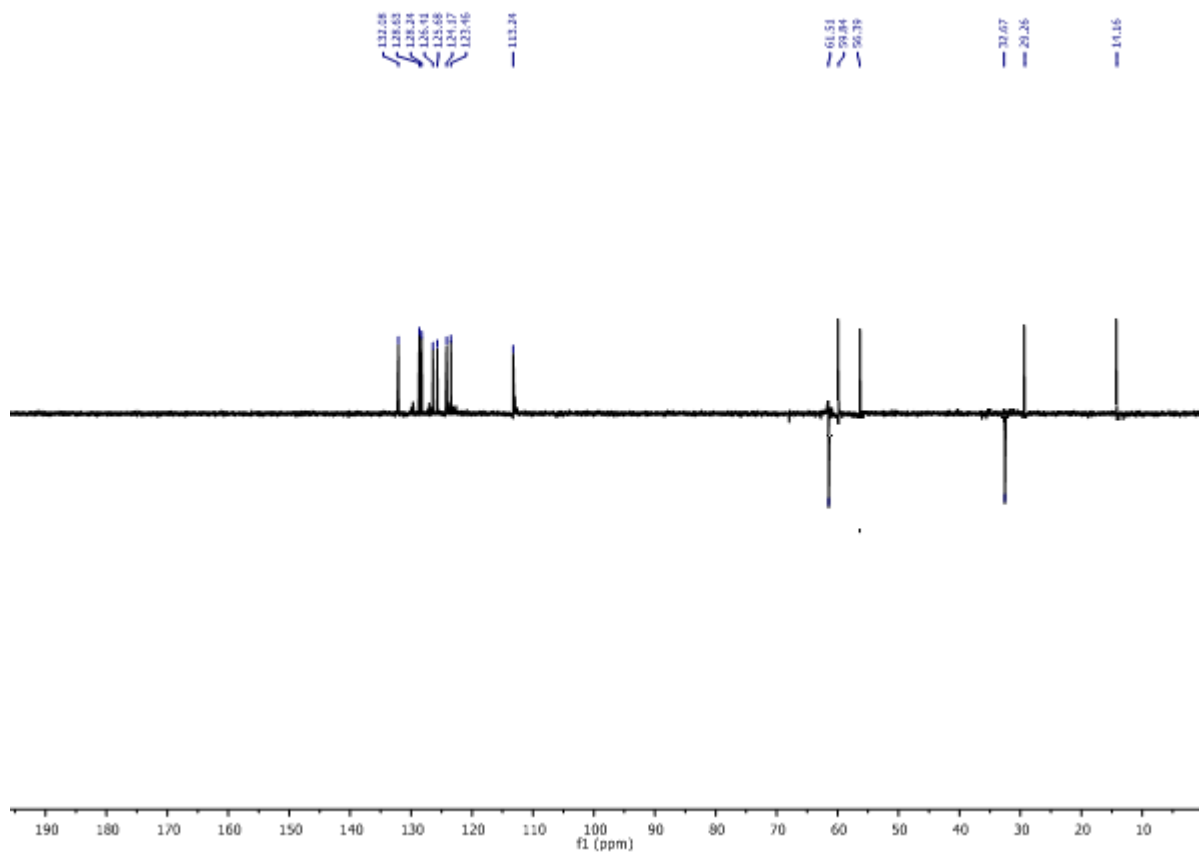

<sup>1</sup>H NMR of compound (5n) (400 MHz, CDCl<sub>3</sub>)

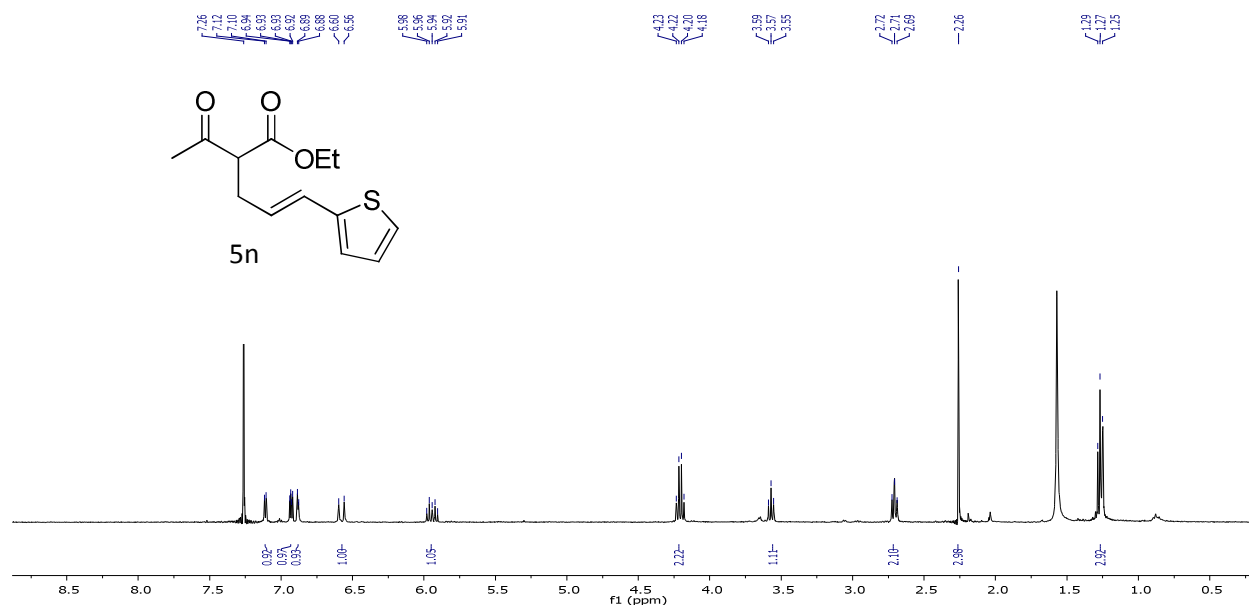

**$^{13}\text{C}$  NMR of compound (5n) (150 MHz,  $\text{CDCl}_3$ )**

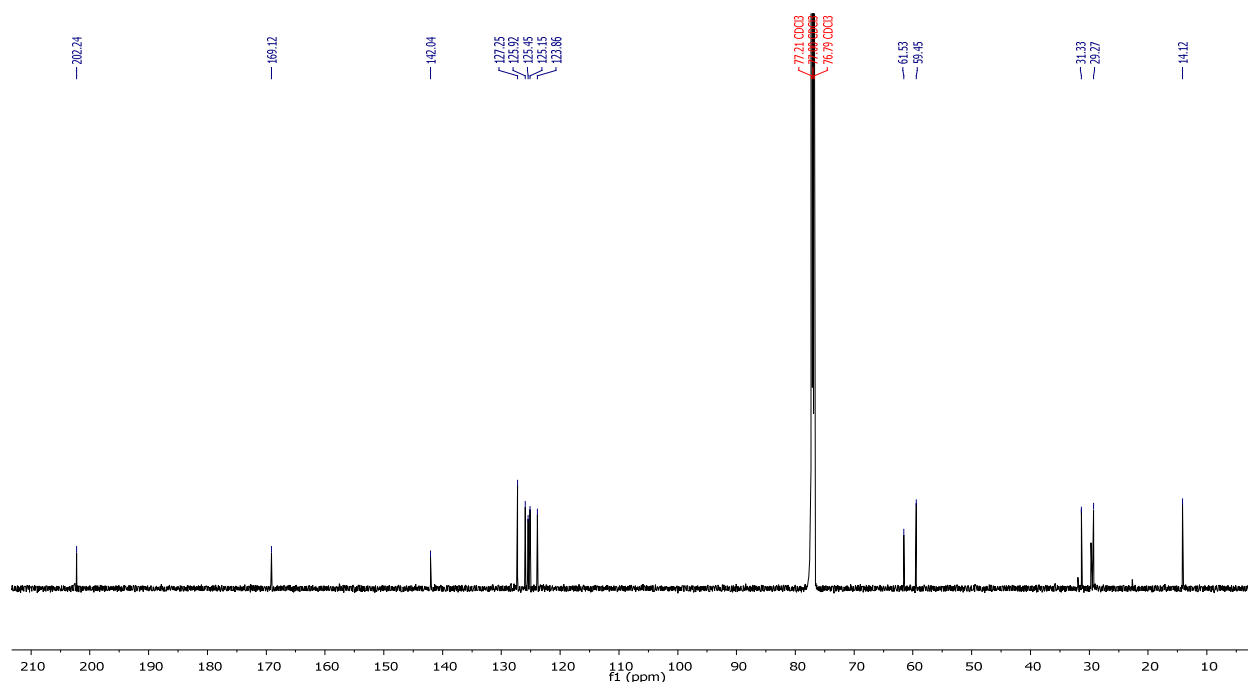

**DEPT-135 of compound (5n) (150 MHz,  $\text{CDCl}_3$ )**

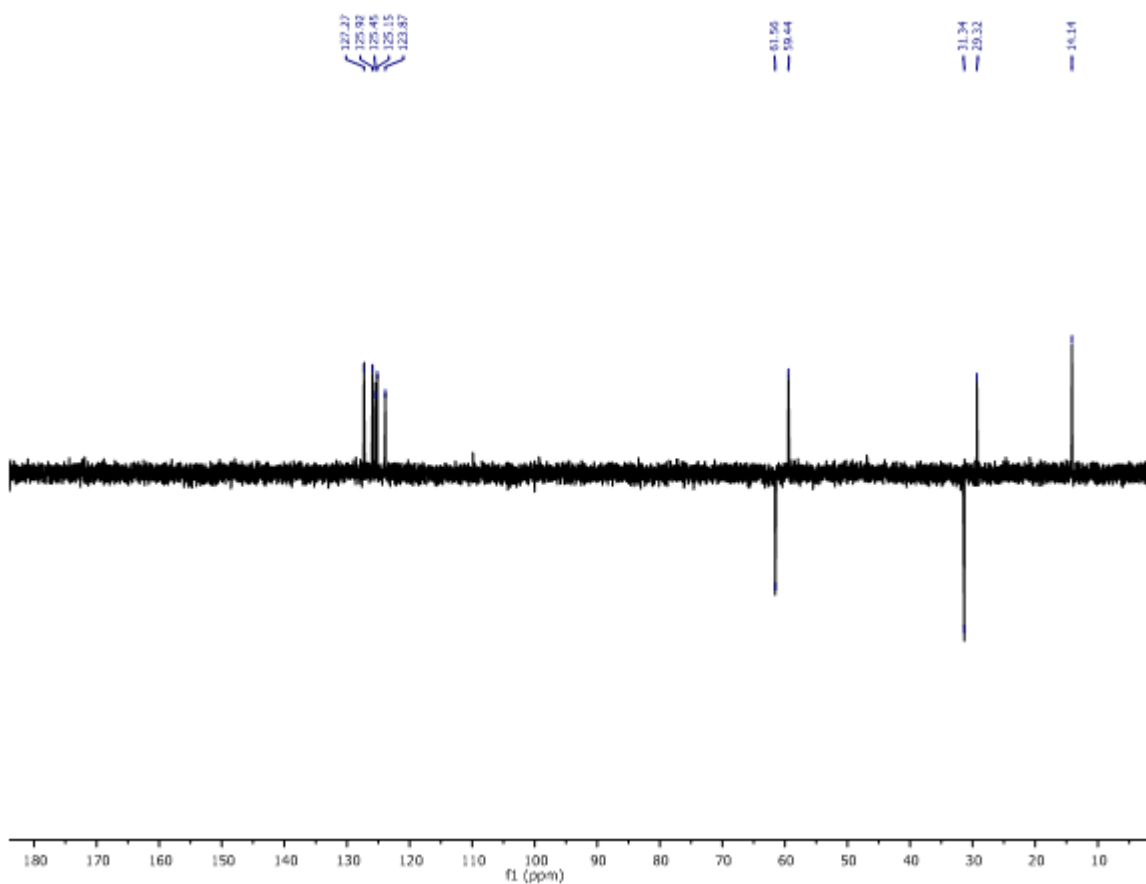

# $^1\text{H}$ NMR of compound (6a) (600 MHz, $\text{CDCl}_3$ )

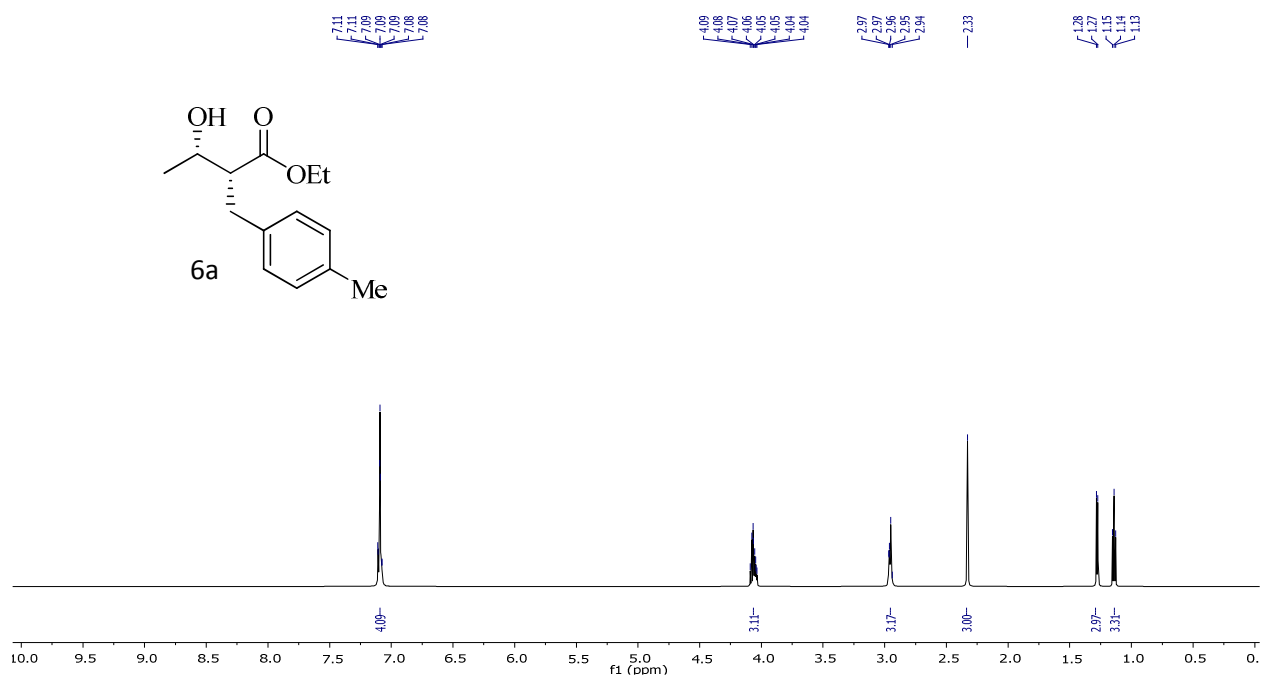

# $^{13}\text{C}$ NMR of compound (6a) (150 MHz, $\text{CDCl}_3$ )

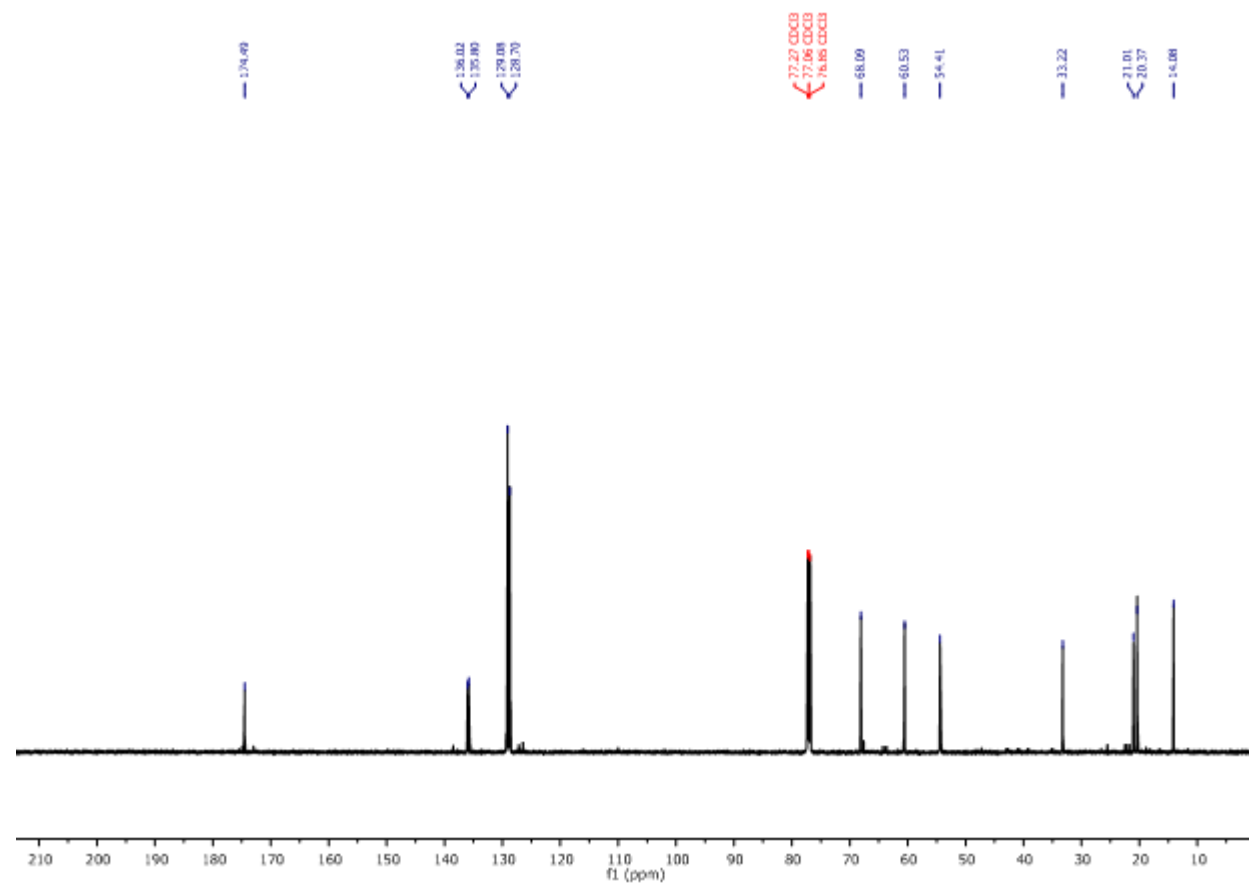

DEPT-135 of compound (6a) (150 MHz, CDCl<sub>3</sub>)

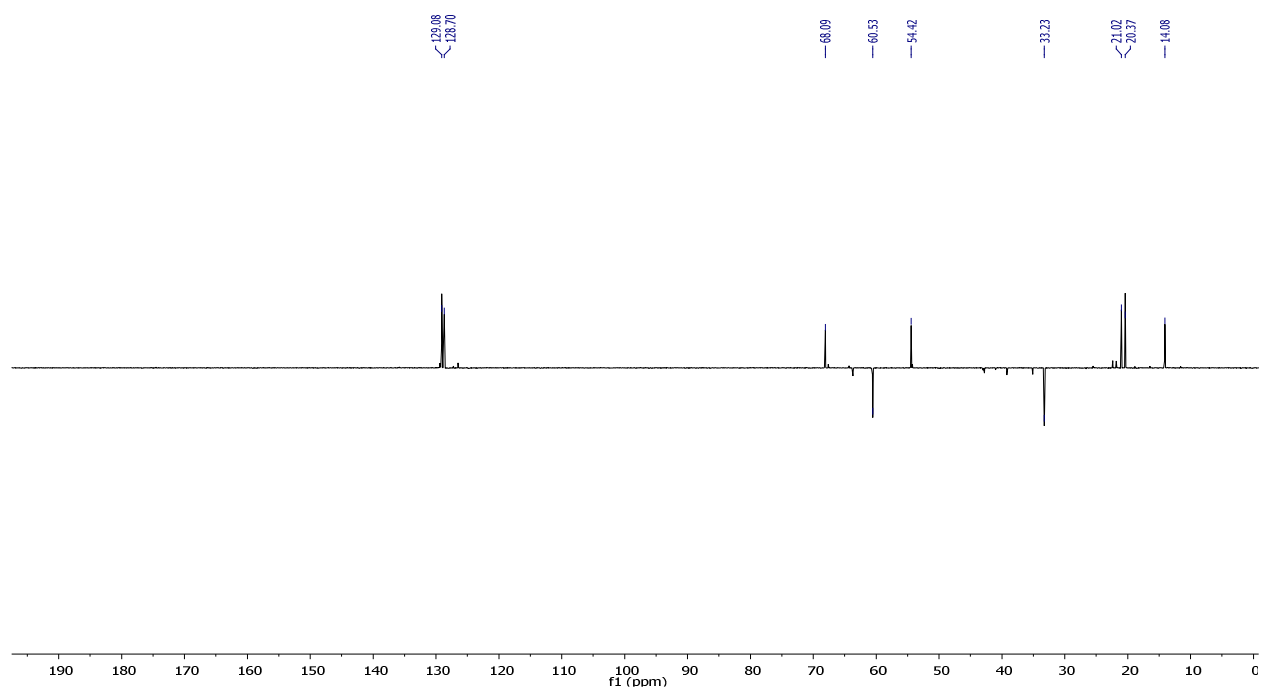

<sup>1</sup>H NMR of compound (6b) (600 MHz, CDCl<sub>3</sub>)

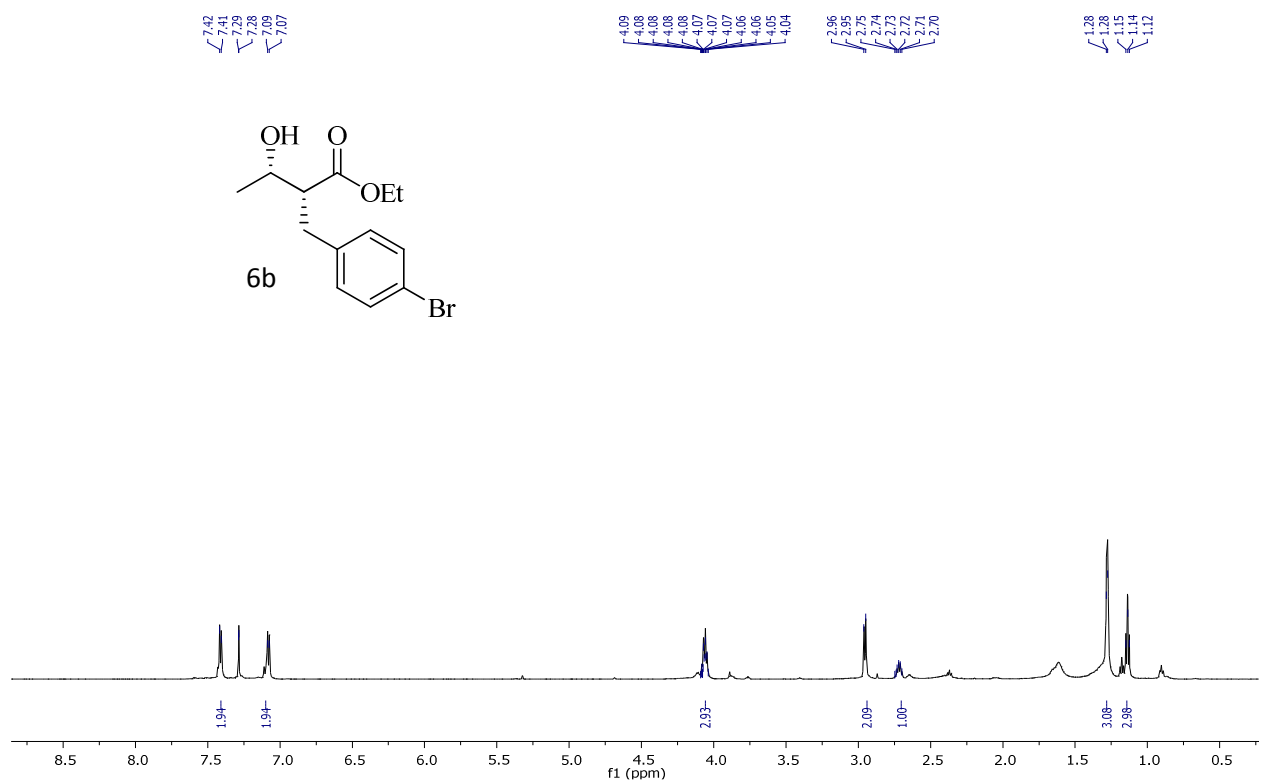



**$^{13}\text{C}$  NMR of compound (6b) (150 MHz,  $\text{CDCl}_3$ )**

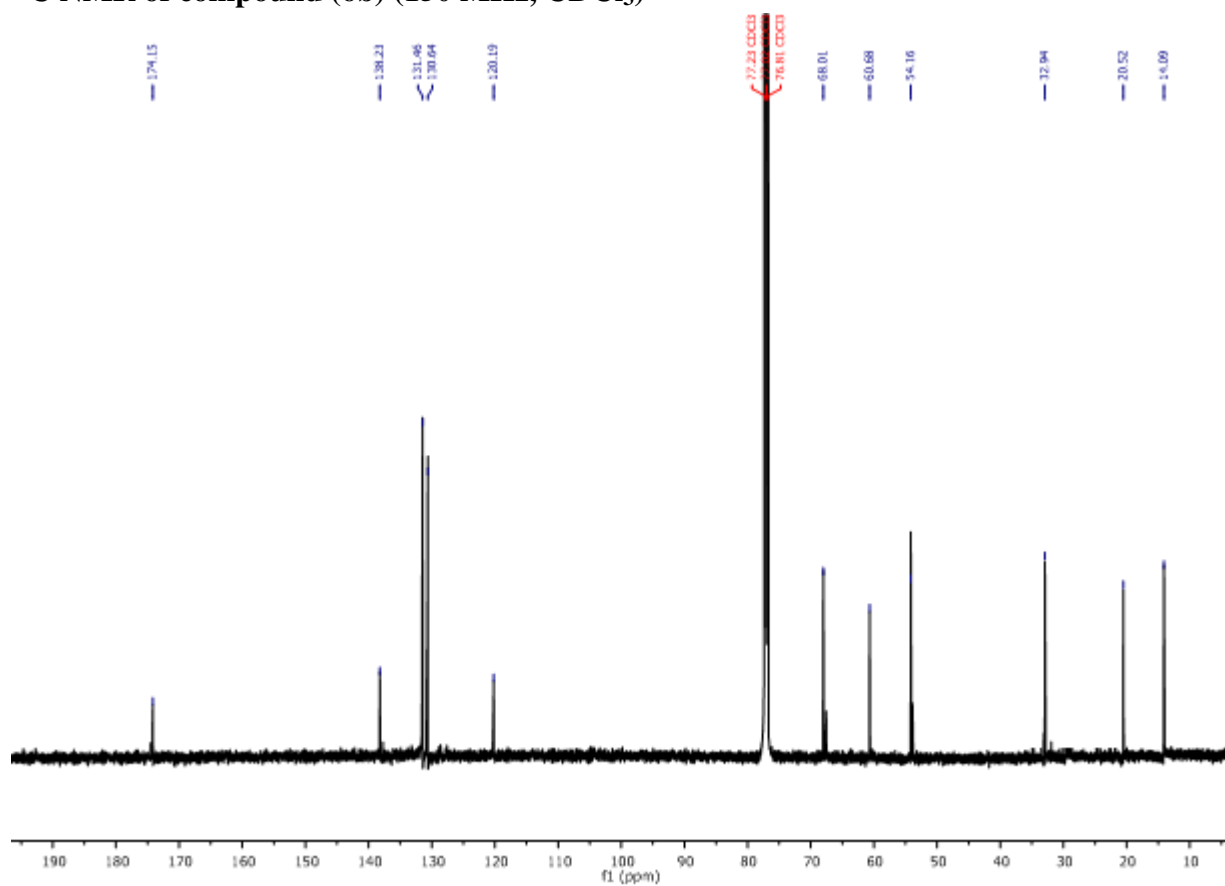

**DEPT-135 of compound (6b) (150 MHz,  $\text{CDCl}_3$ )**

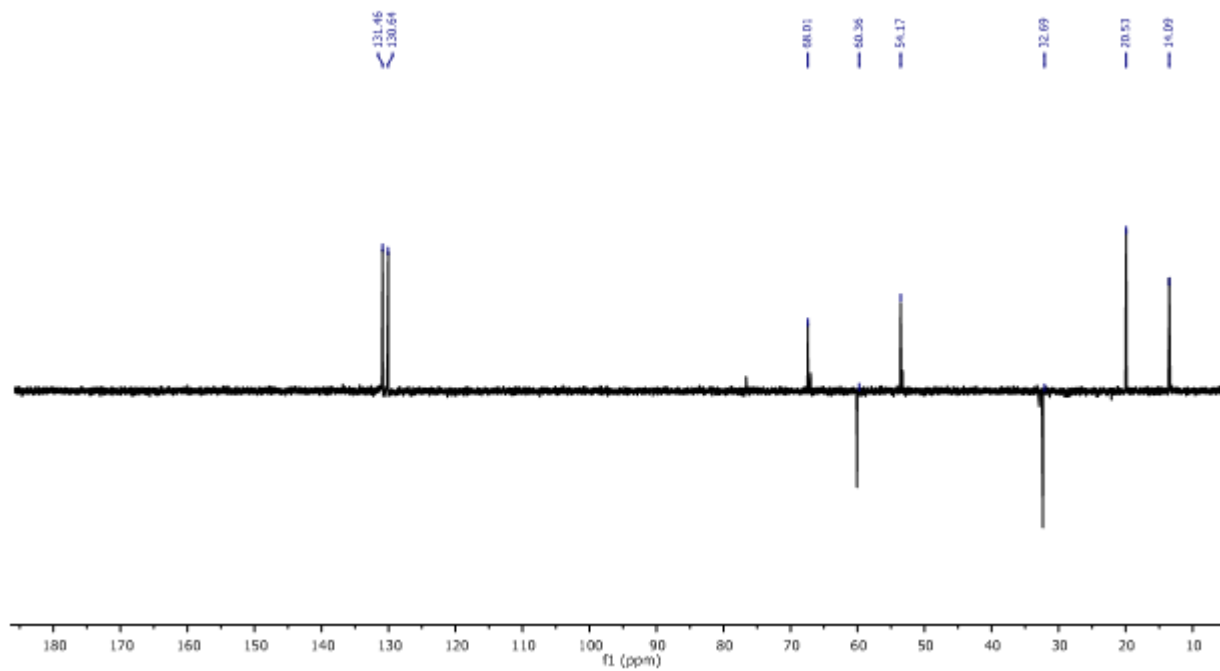

# $^1\text{H}$ NMR of compound (6c) (600 MHz, $\text{CDCl}_3$ )

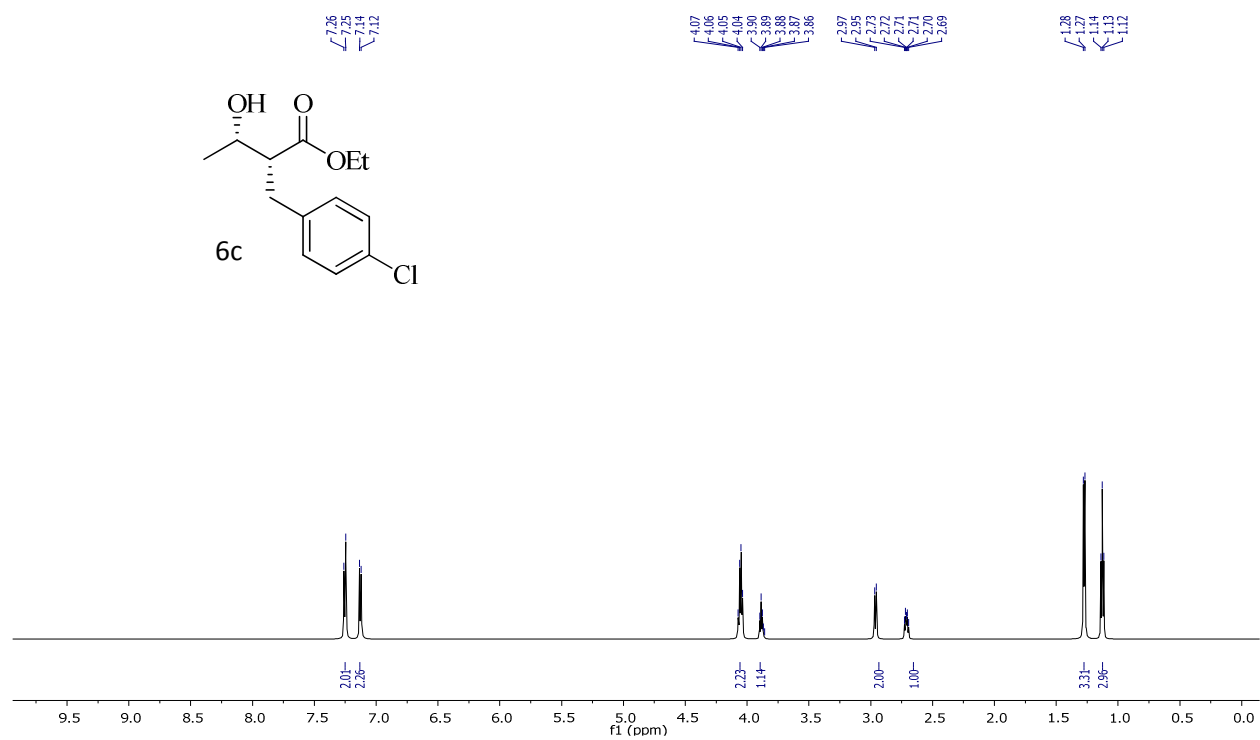

# $^{13}\text{C}$ NMR of compound (6c) (150 MHz, $\text{CDCl}_3$ )

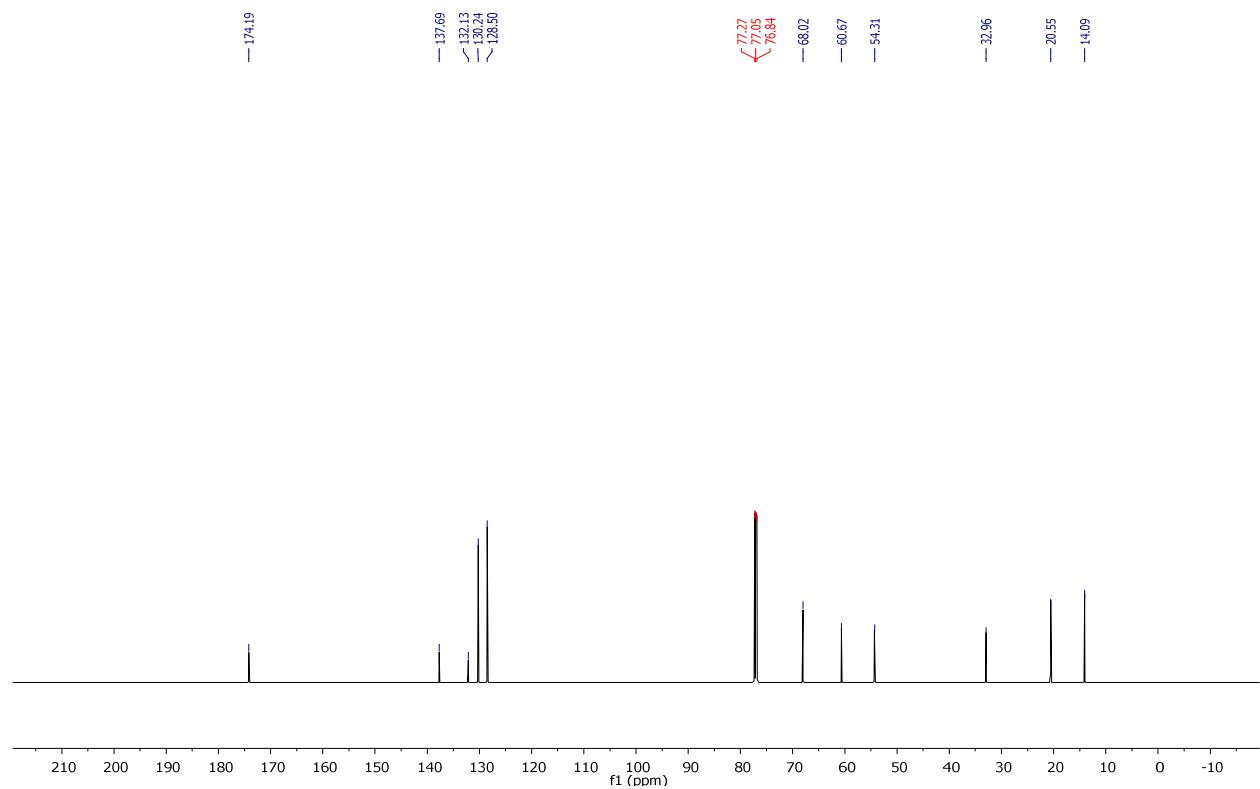

DEPT-135 of compound (6c) (150 MHz, CDCl<sub>3</sub>)

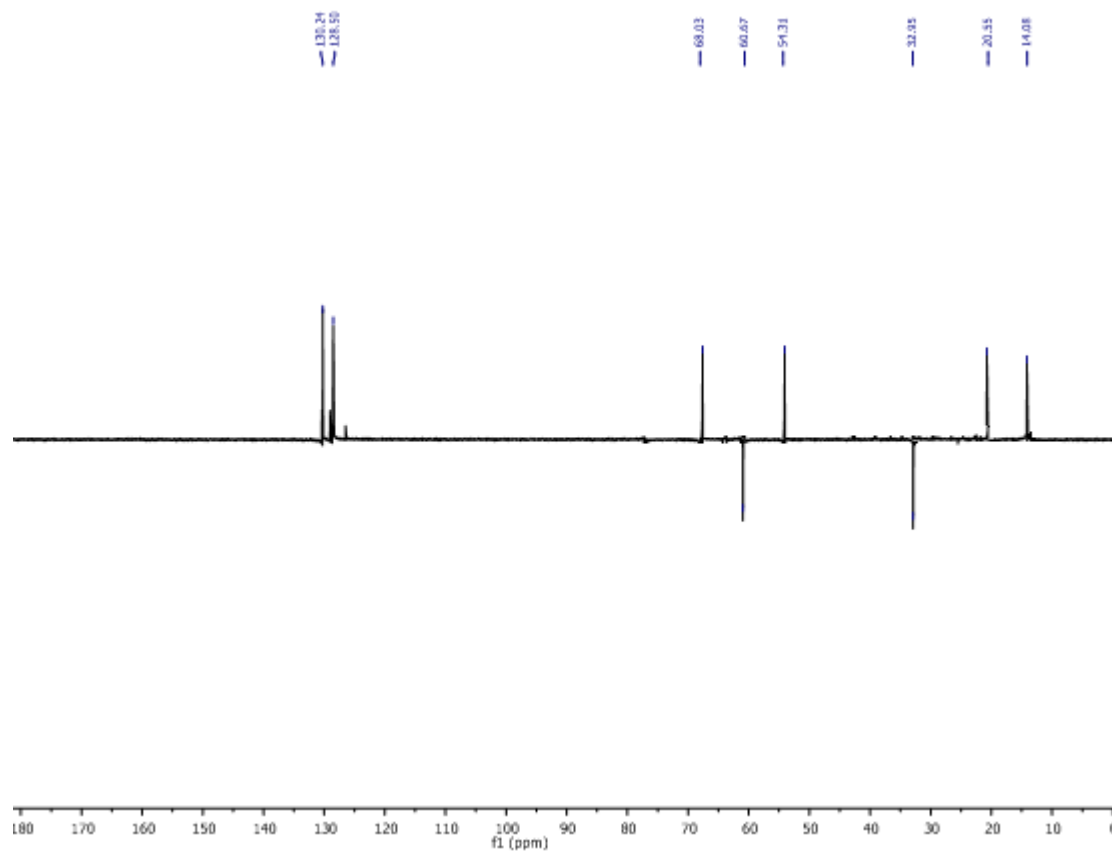

<sup>1</sup>H NMR of compound (6d) (600 MHz, CDCl<sub>3</sub>)

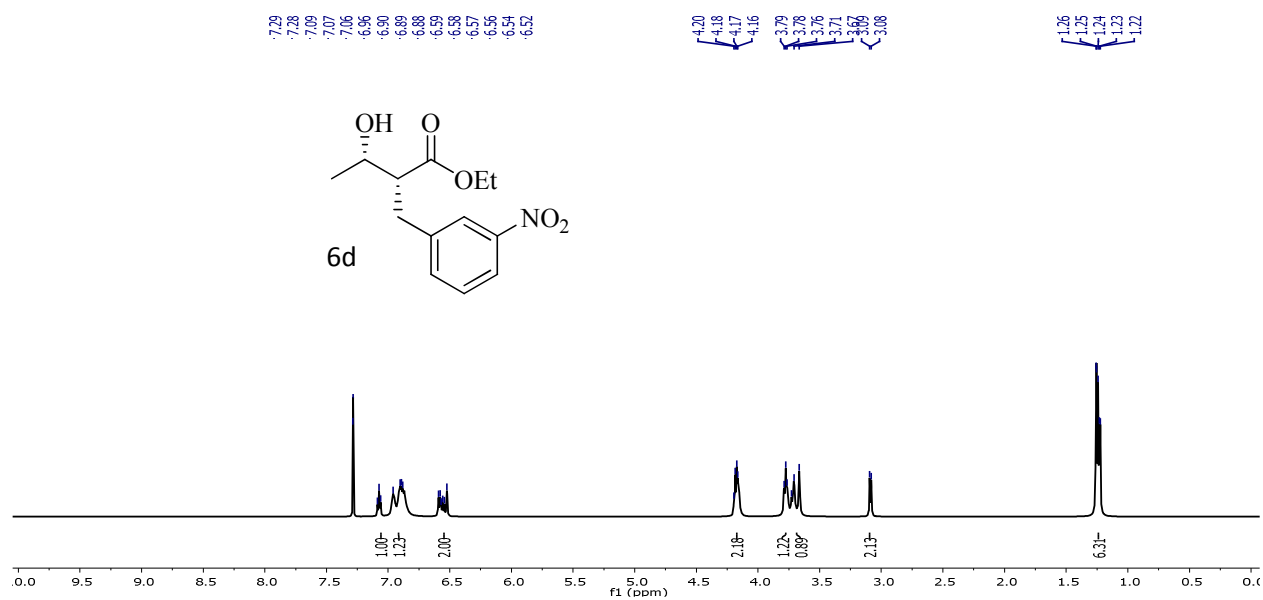

**$^{13}\text{C}$  NMR of compound (6d) (150 MHz,  $\text{CDCl}_3$ )**

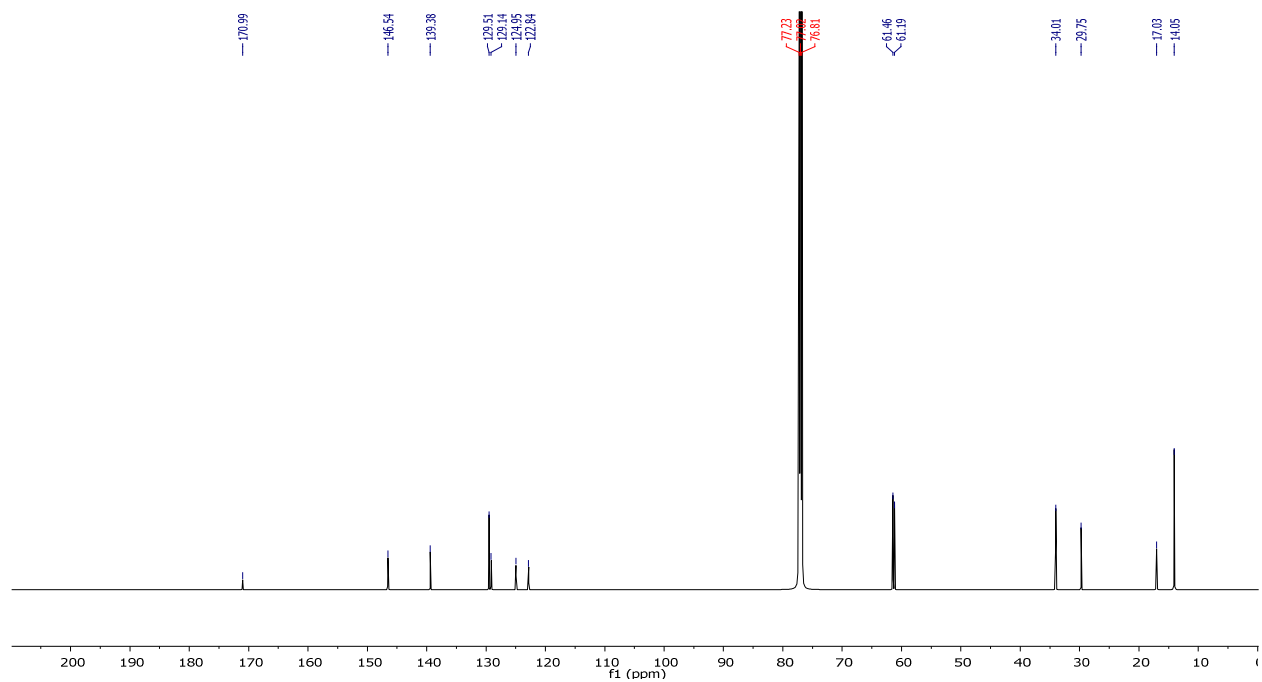

**DEPT-135 of compound (6d) (150 MHz,  $\text{CDCl}_3$ )**

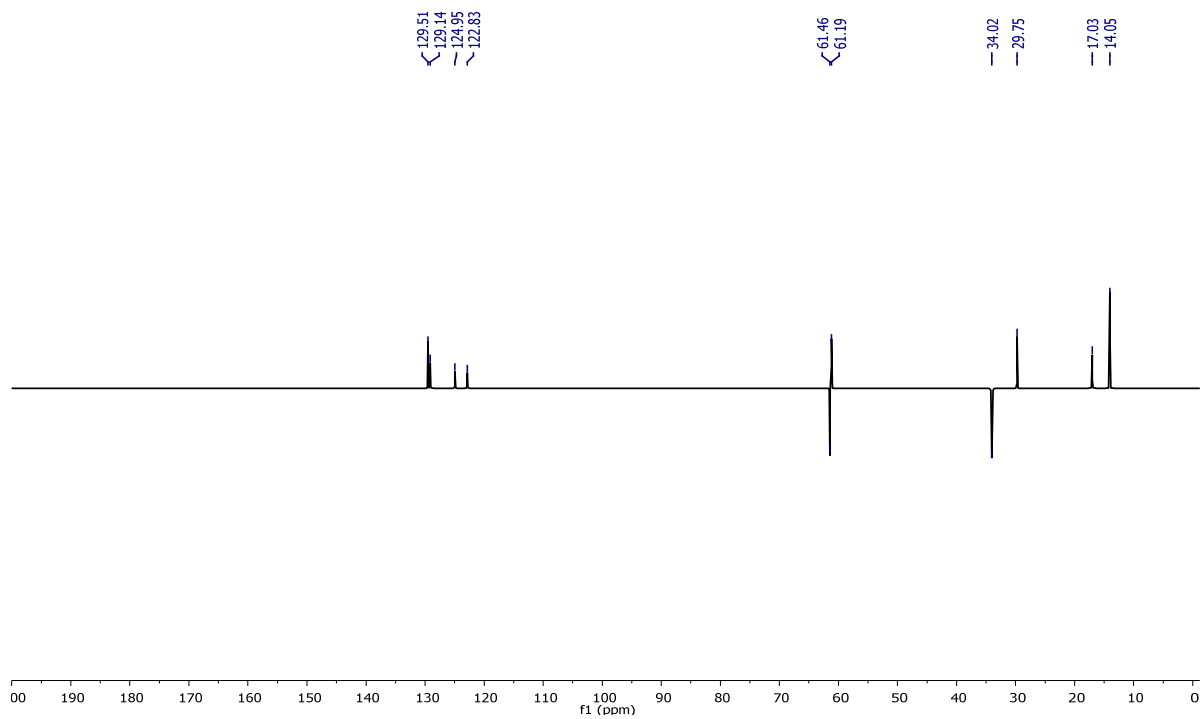

### $^1\text{H}$ NMR of compound (6e) (600 MHz, $\text{CDCl}_3$ )

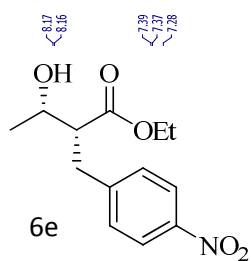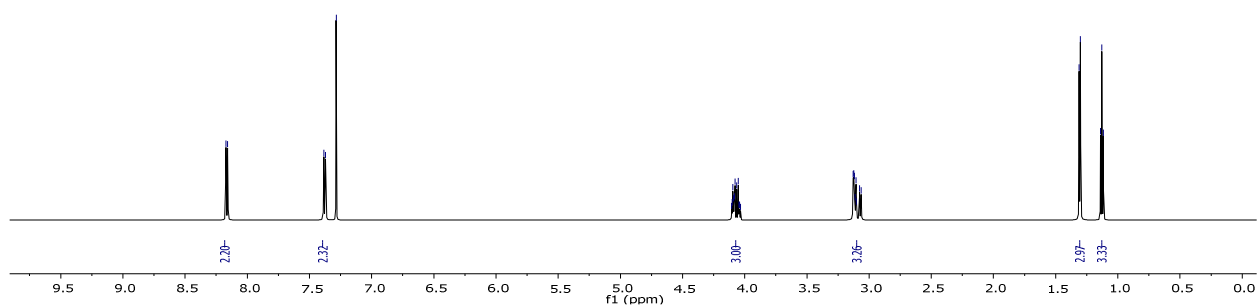

### $^{13}\text{C}$ NMR of compound (6e) (150 MHz, $\text{CDCl}_3$ )

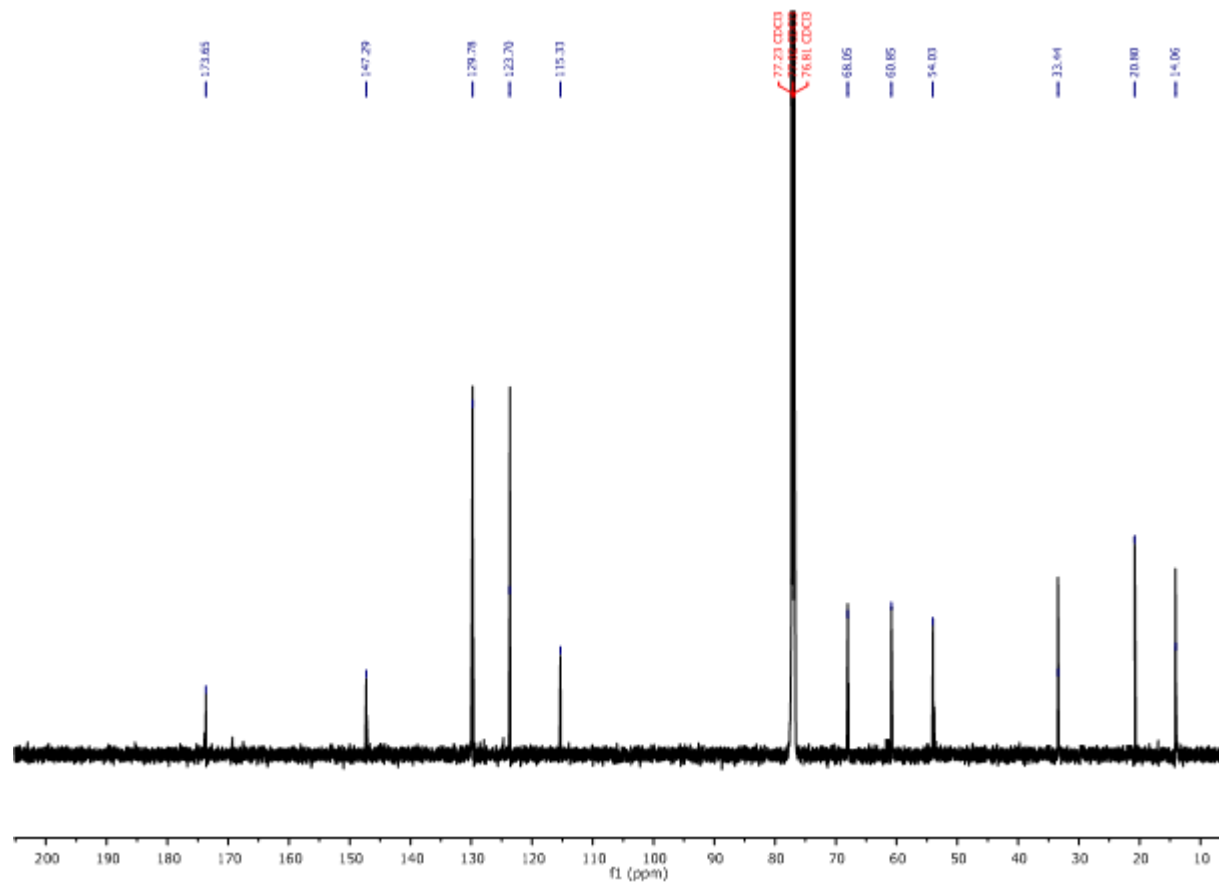

DEPT-135 of compound (6e) (150 MHz, CDCl<sub>3</sub>)

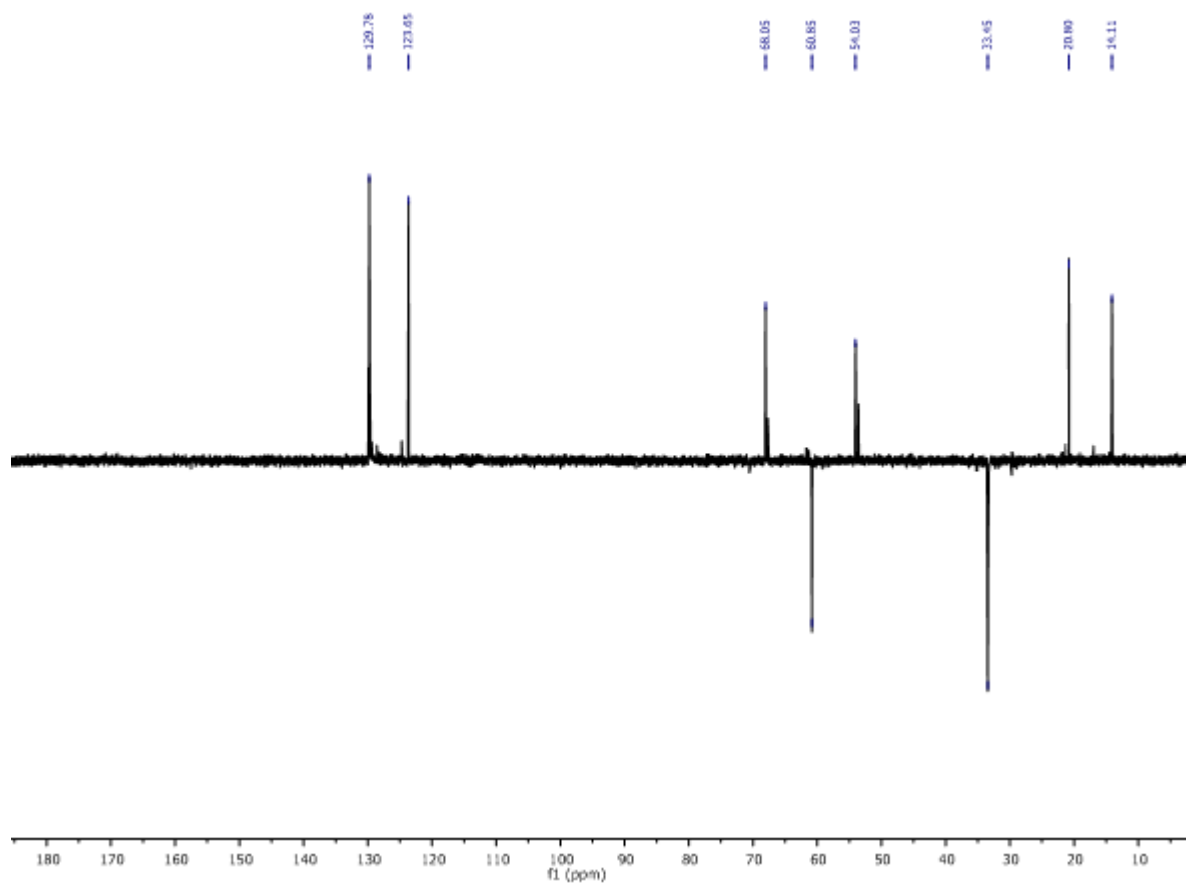

<sup>1</sup>H NMR of compound (6f) (600 MHz, CDCl<sub>3</sub>)

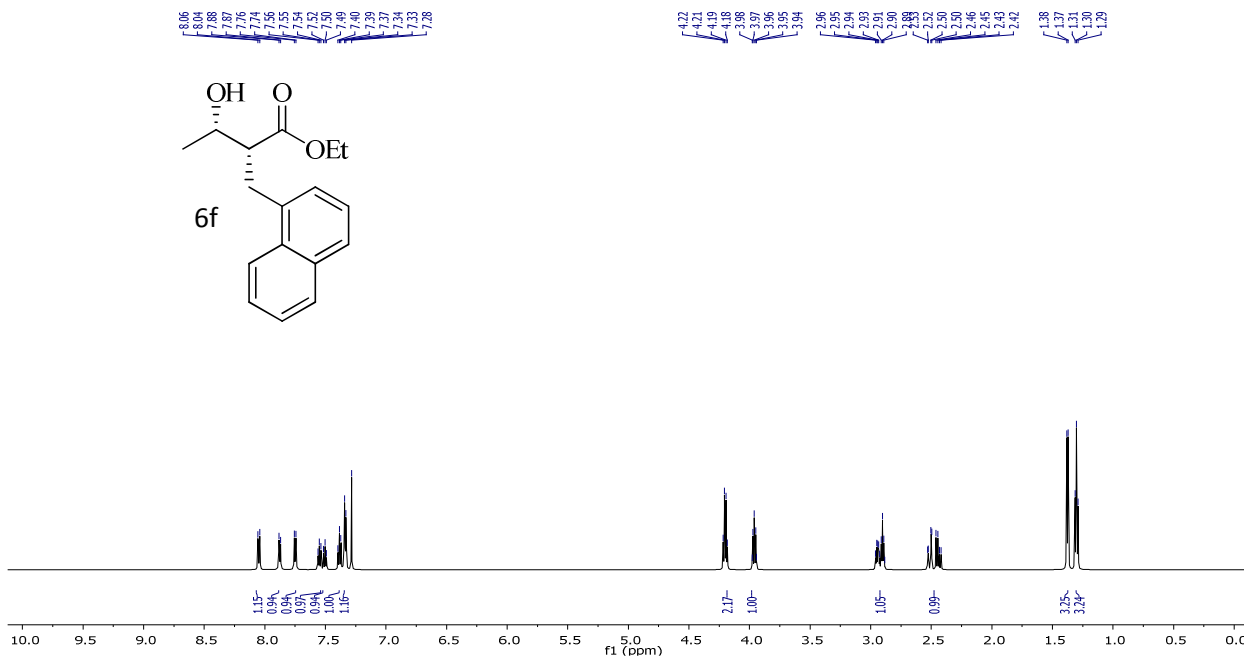

### $^{13}\text{C}$ NMR of compound (6f) (150 MHz, $\text{CDCl}_3$ )

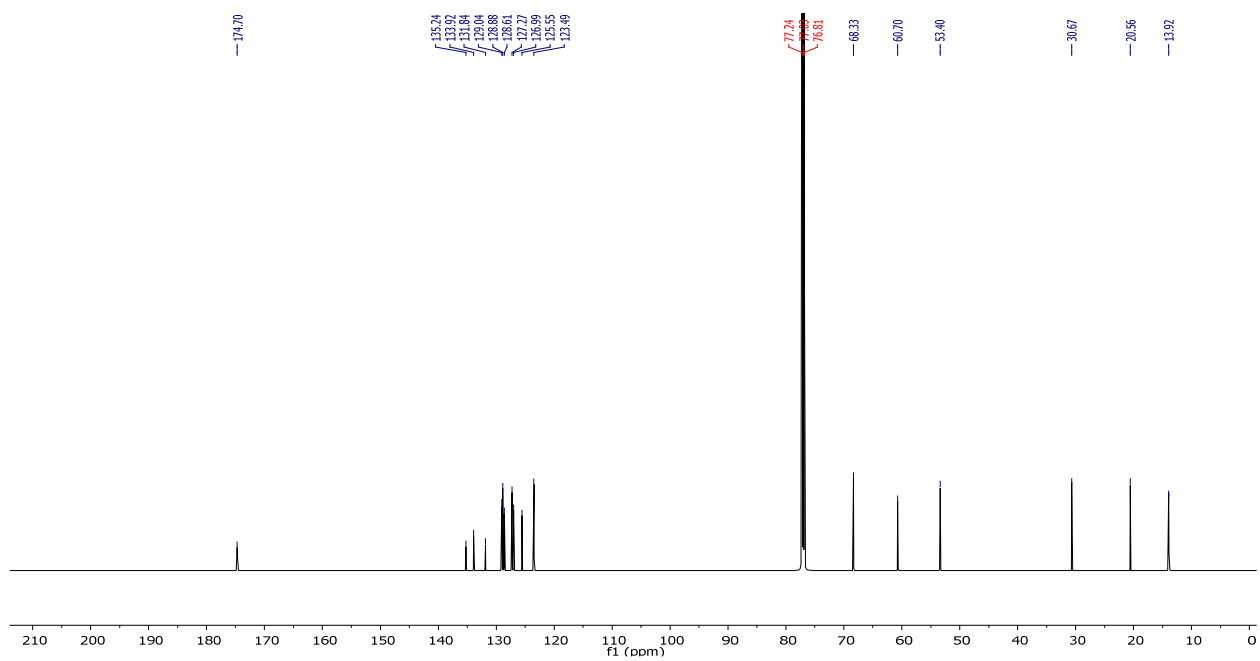

### DEPT-135 of compound (6f) (150 MHz, $\text{CDCl}_3$ )

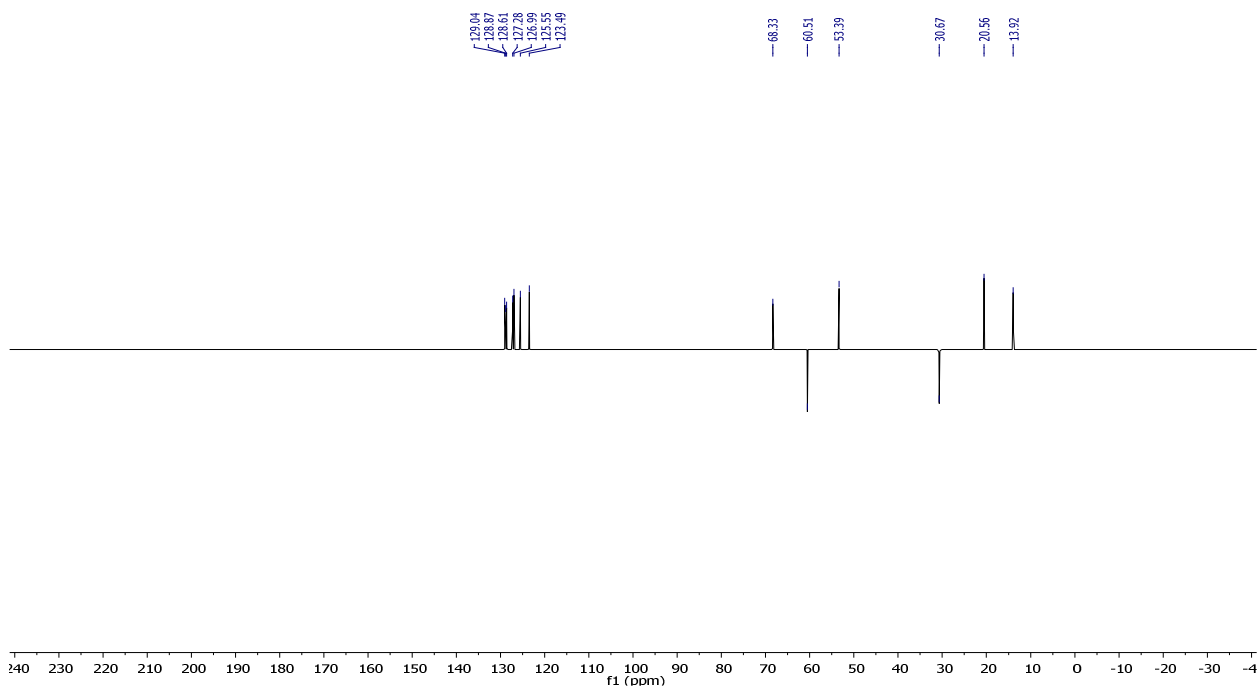

### $^1\text{H}$ NMR of compound (6g) (600 MHz, $\text{CDCl}_3$ )

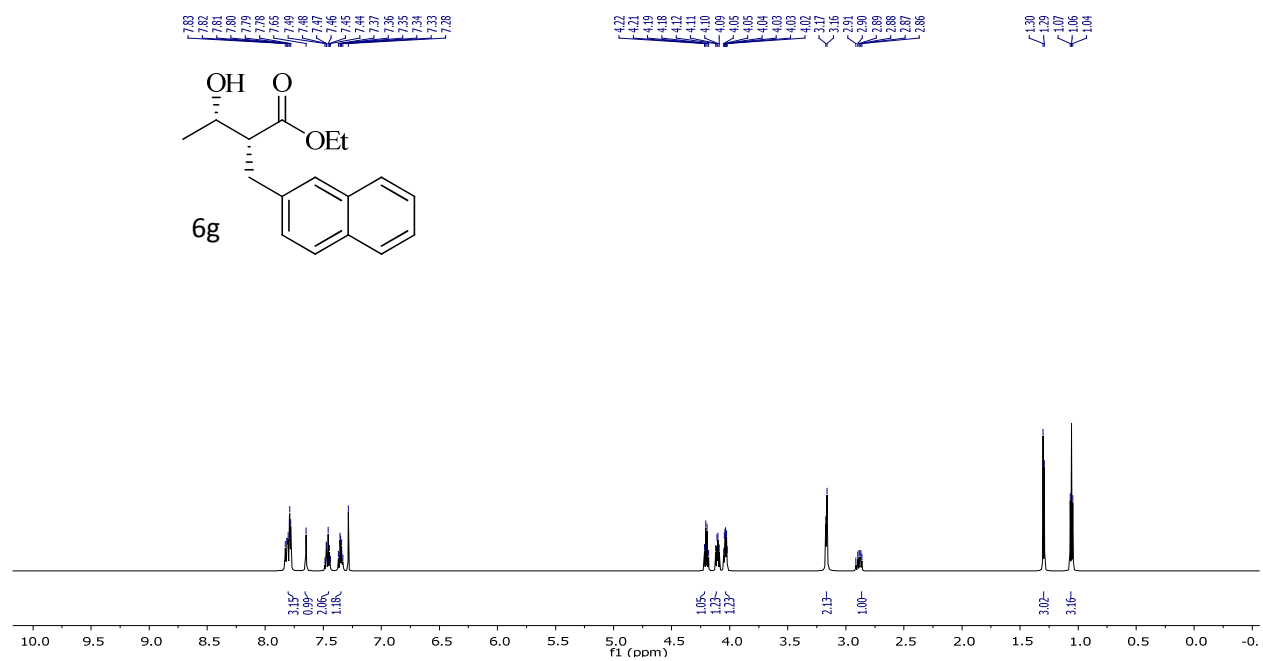

### $^{13}\text{C}$ NMR of compound (6g) (150 MHz, $\text{CDCl}_3$ )

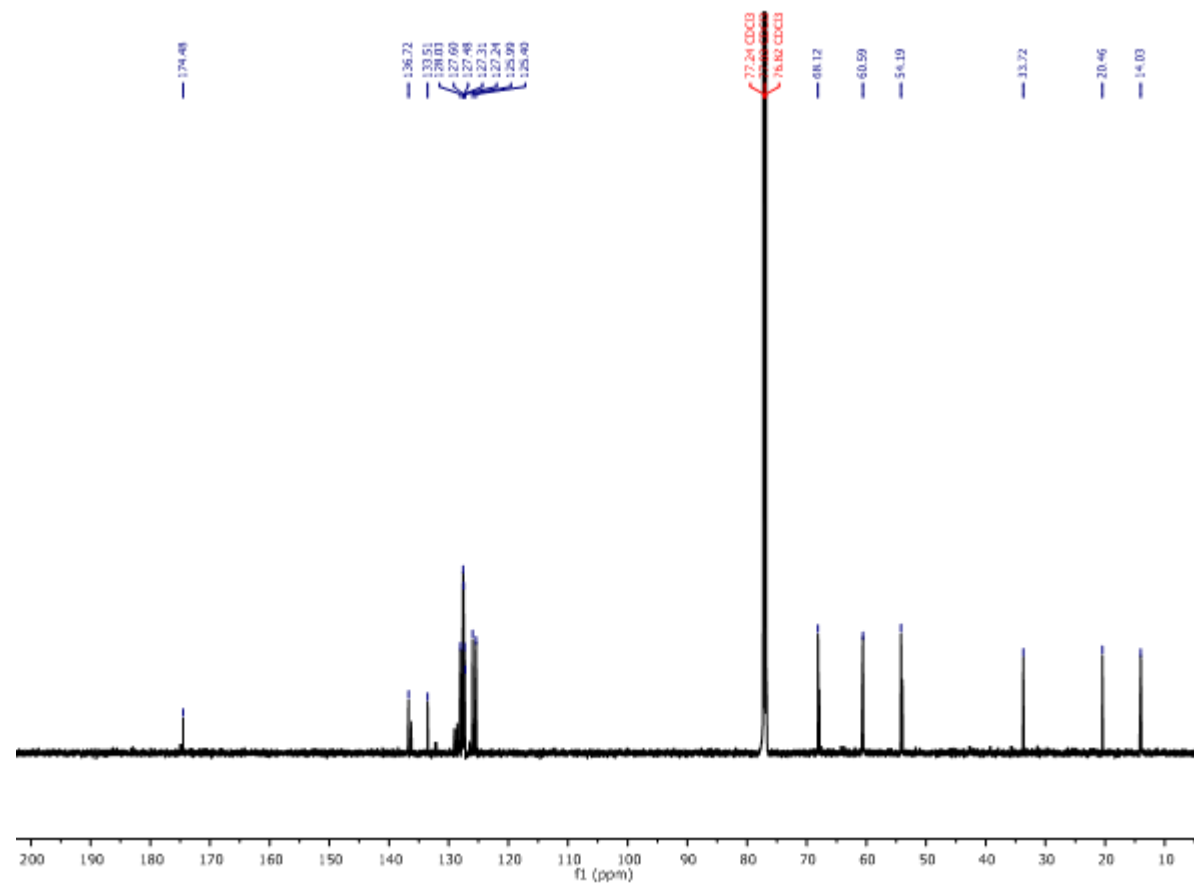



DEPT-135 of compound (6g) (150 MHz, CDCl<sub>3</sub>)

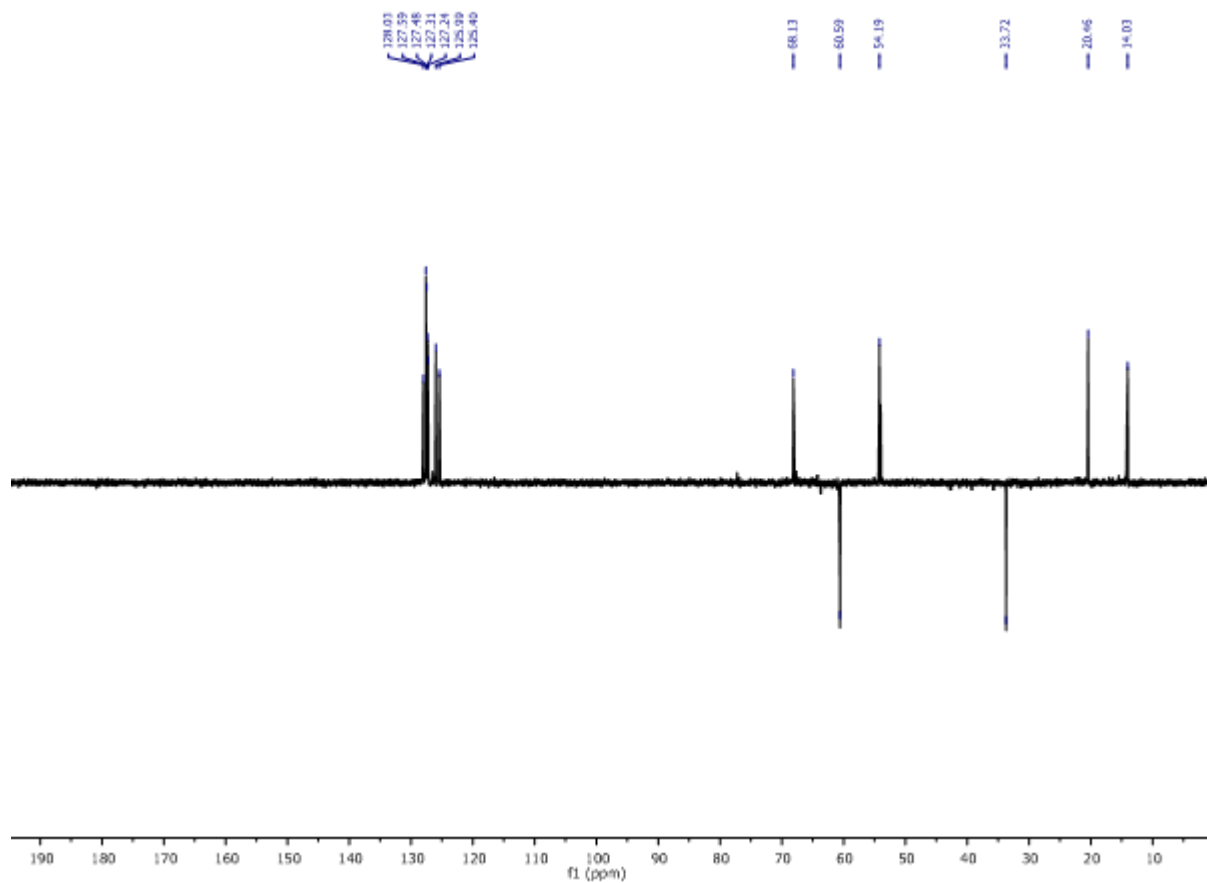

<sup>1</sup>H NMR of compound (6h) (400 MHz, CDCl<sub>3</sub>)

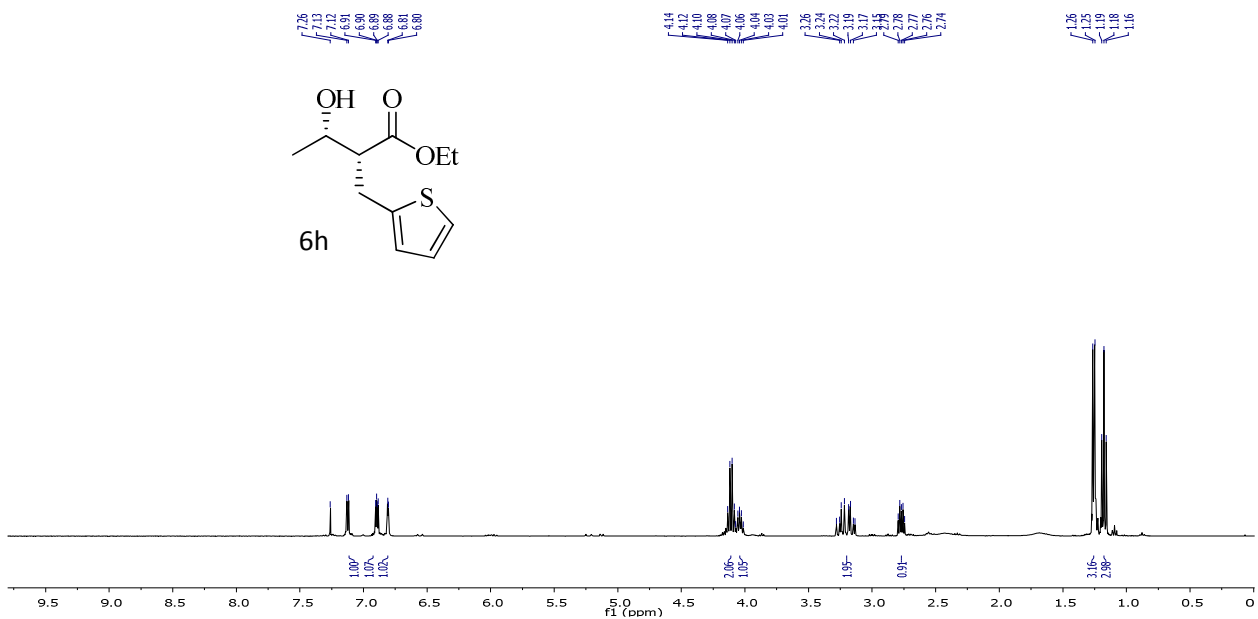

**$^{13}\text{C}$  NMR of compound (6h) (150 MHz,  $\text{CDCl}_3$ )**

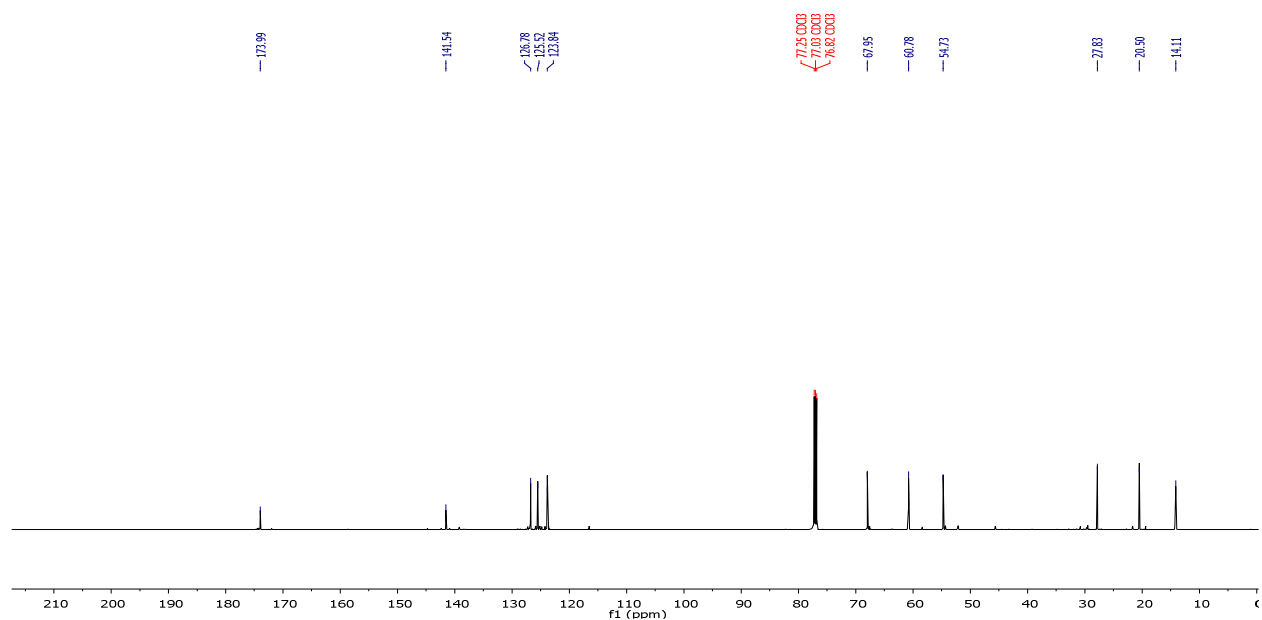

**DEPT-135 of compound (6h) (150 MHz,  $\text{CDCl}_3$ )**

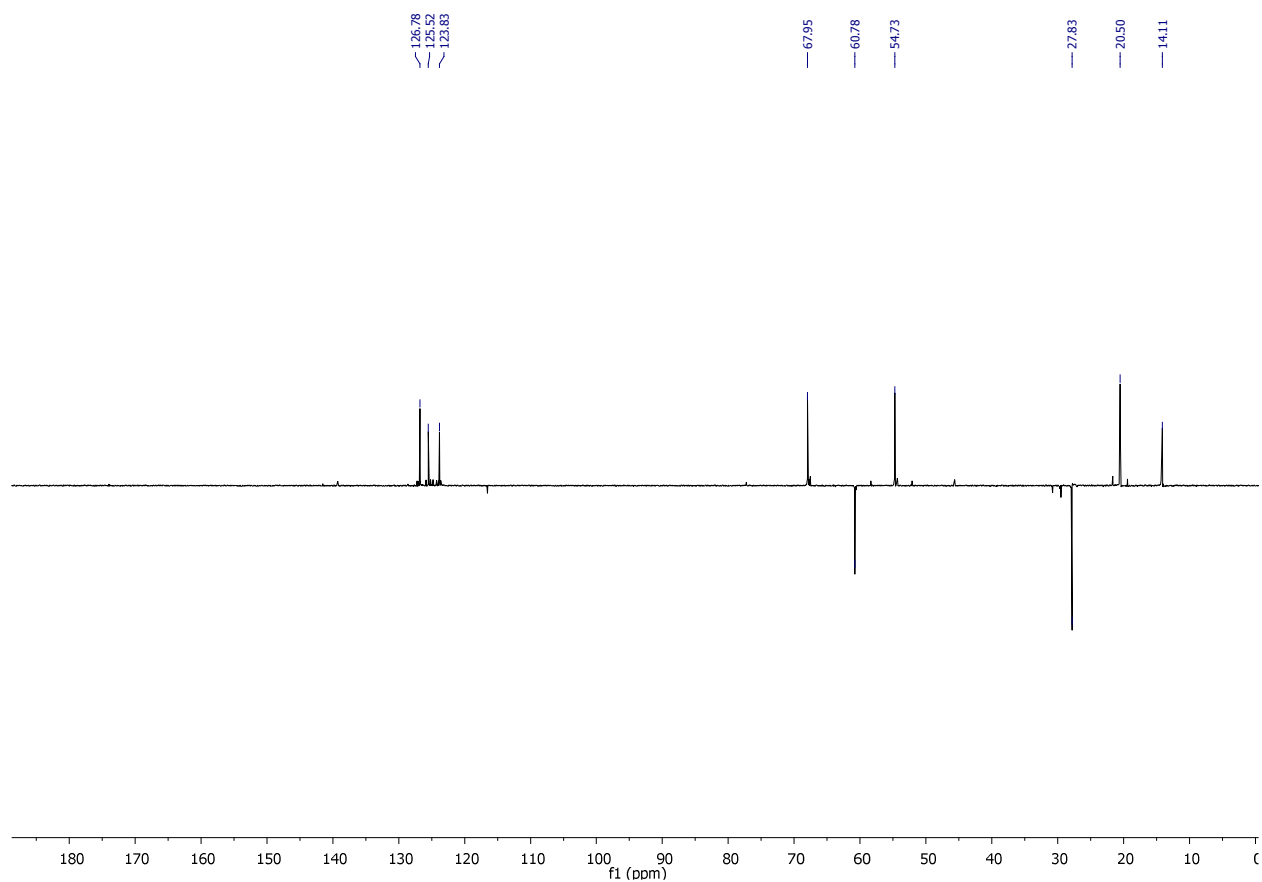

# <sup>1</sup>H NMR of compound (7a) (400 MHz, CDCl<sub>3</sub>)

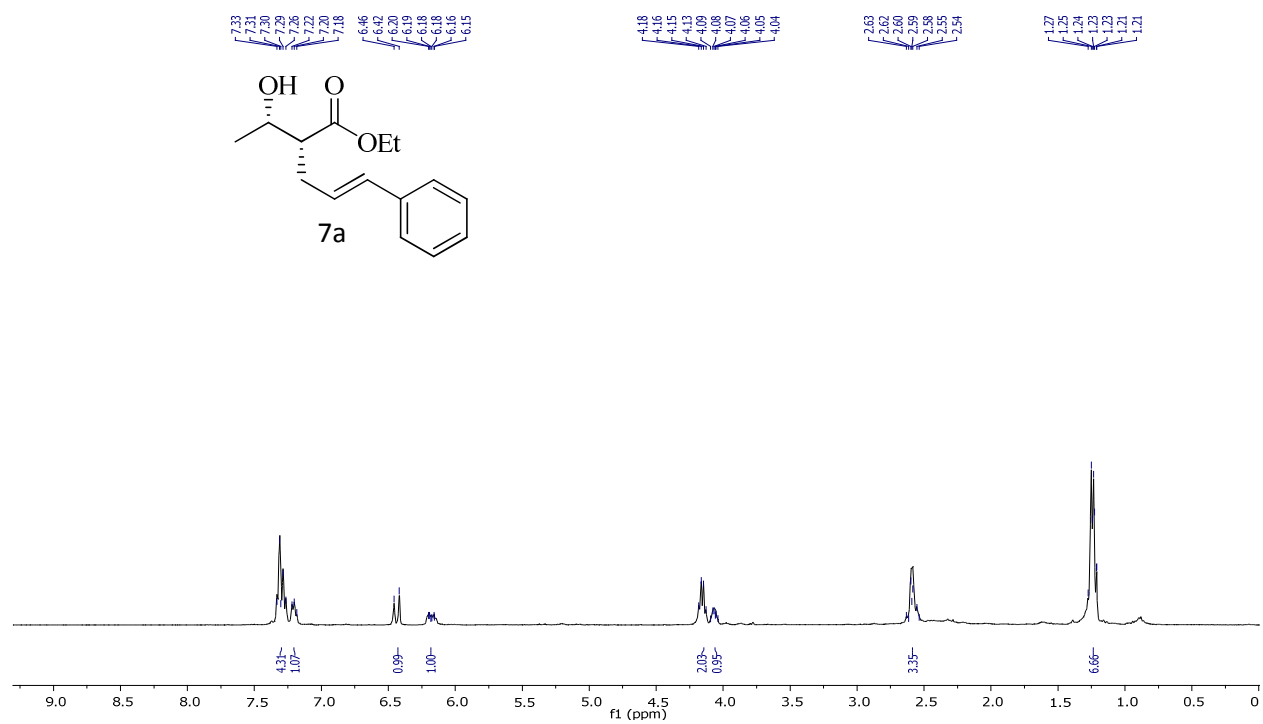

# <sup>13</sup>C NMR of compound (7a) (100 MHz, CDCl<sub>3</sub>)

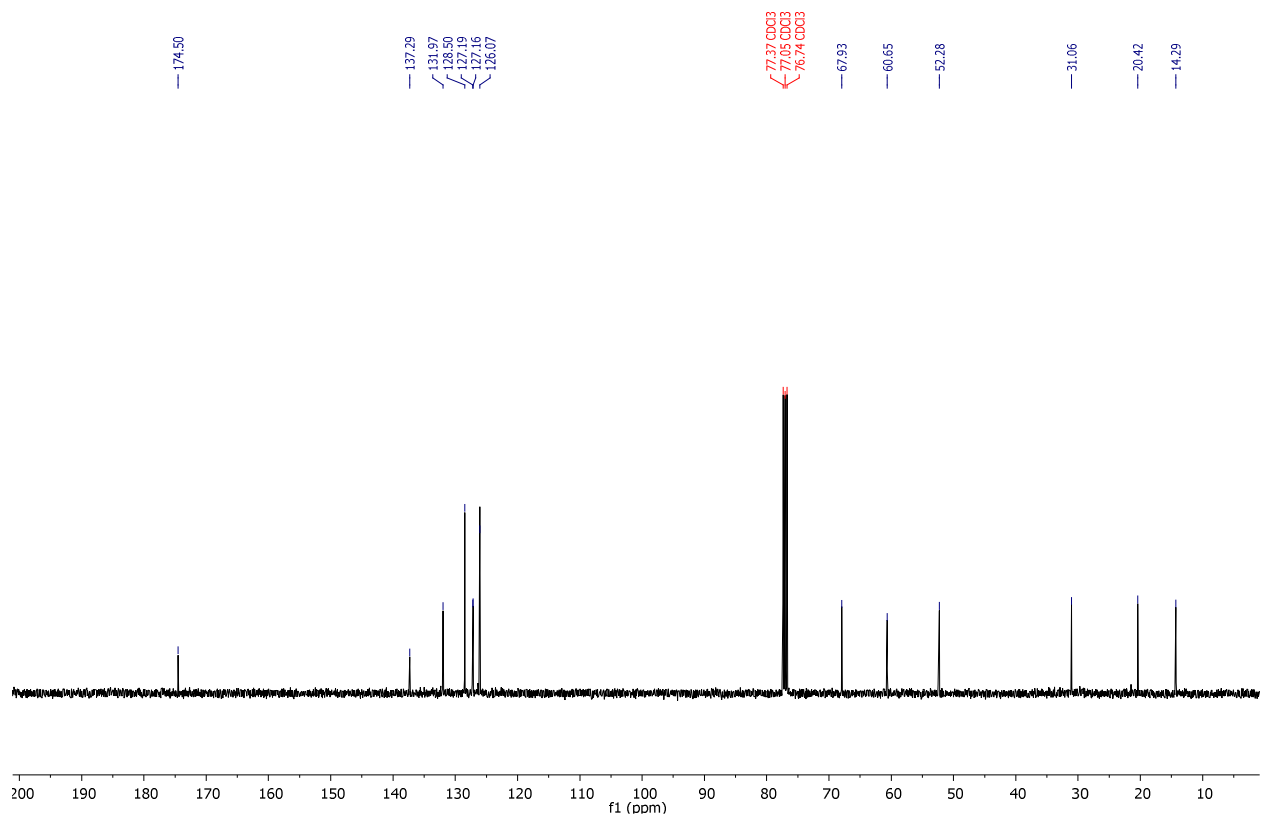

DEPT-135 of compound (7a) (100 MHz, CDCl<sub>3</sub>)

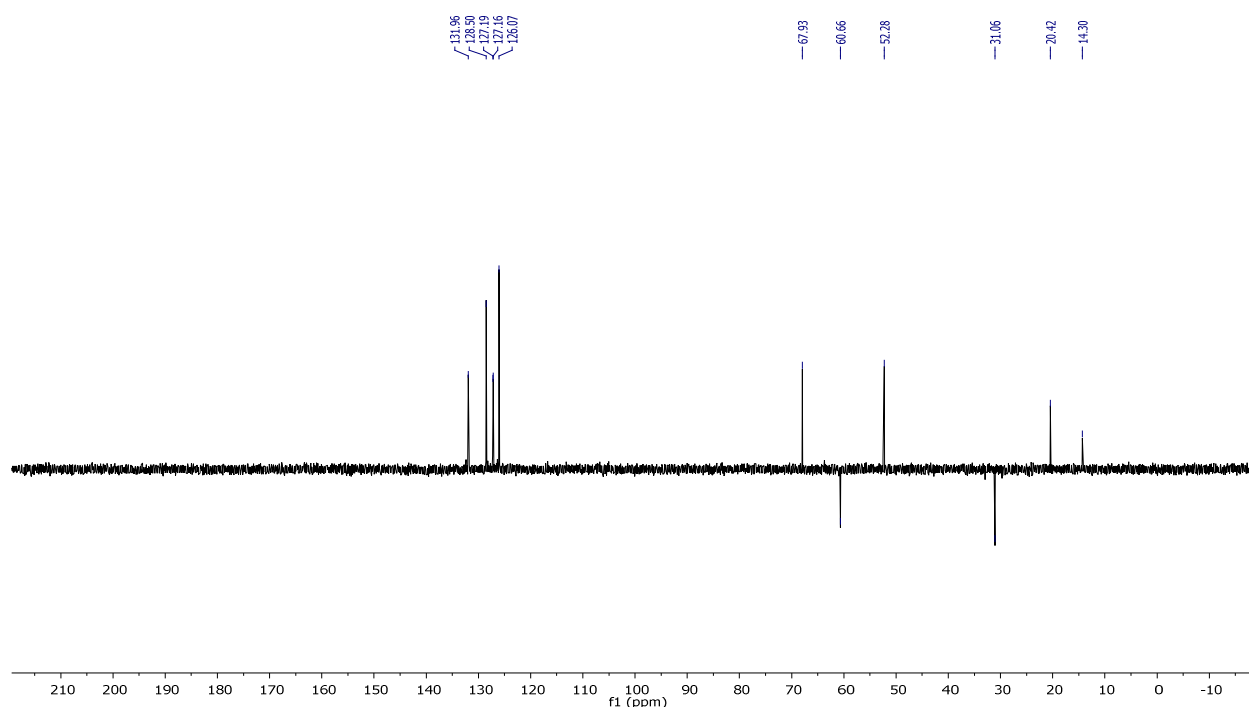

<sup>1</sup>H NMR of compound (7b) (600 MHz, CDCl<sub>3</sub>)

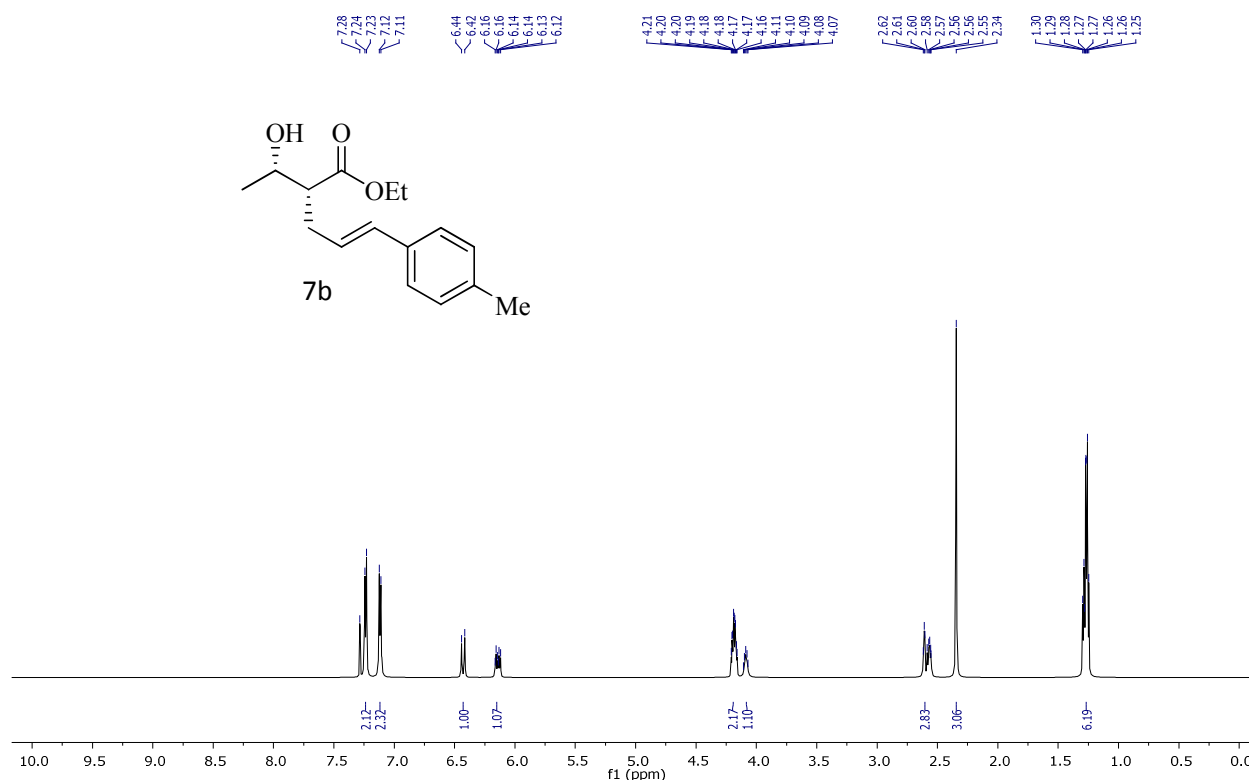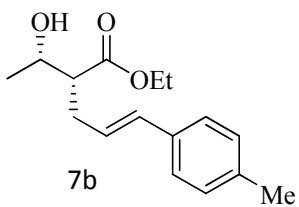

**$^{13}\text{C}$  NMR of compound (7b) (150 MHz,  $\text{CDCl}_3$ )**

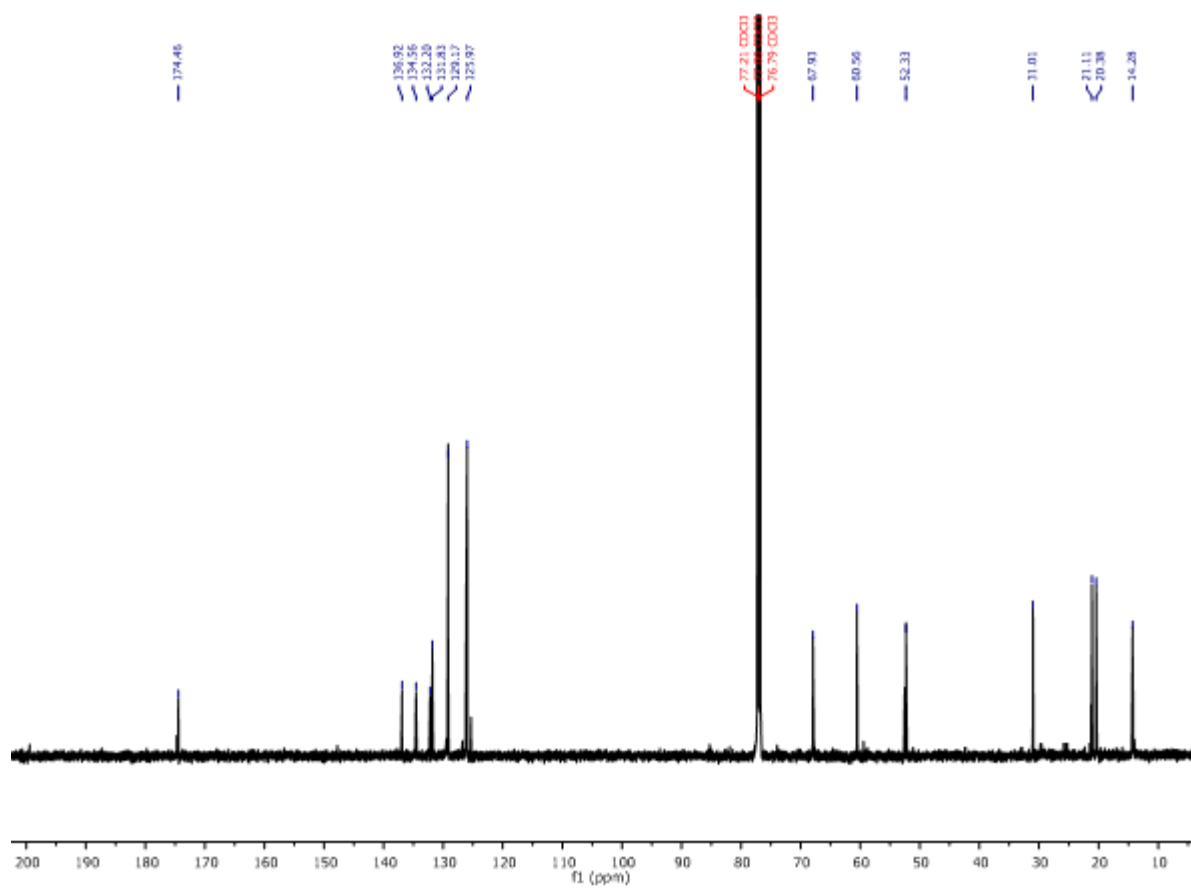

**DEPT-135 of compound (7b) (150 MHz,  $\text{CDCl}_3$ )**

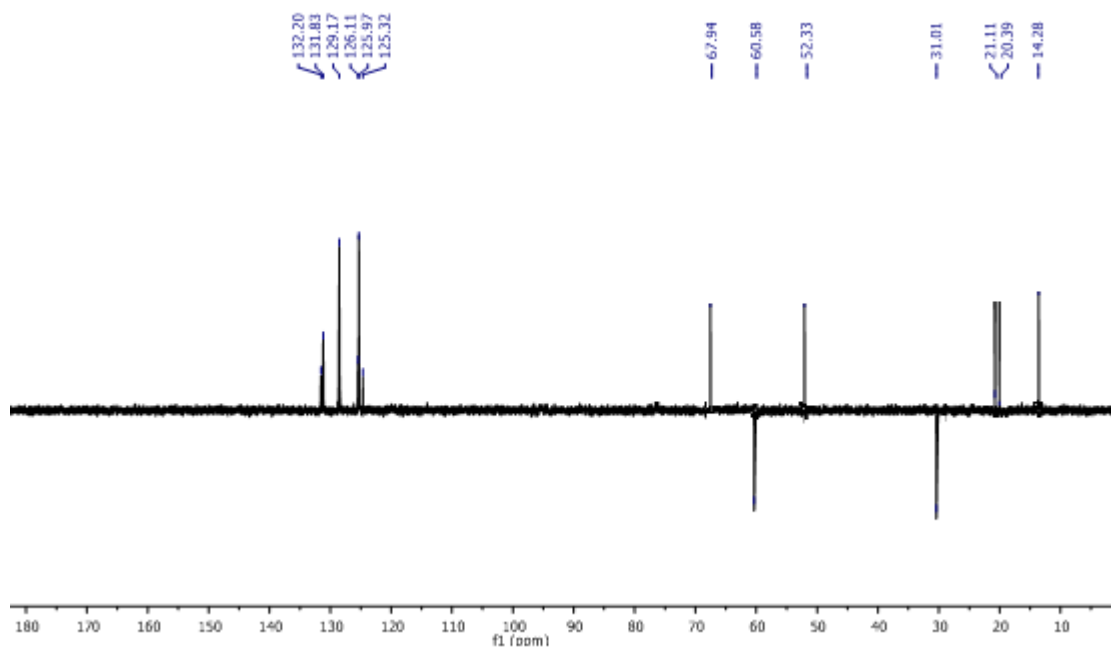

### $^1\text{H}$ NMR of compound (7c) (600 MHz, $\text{CDCl}_3$ )

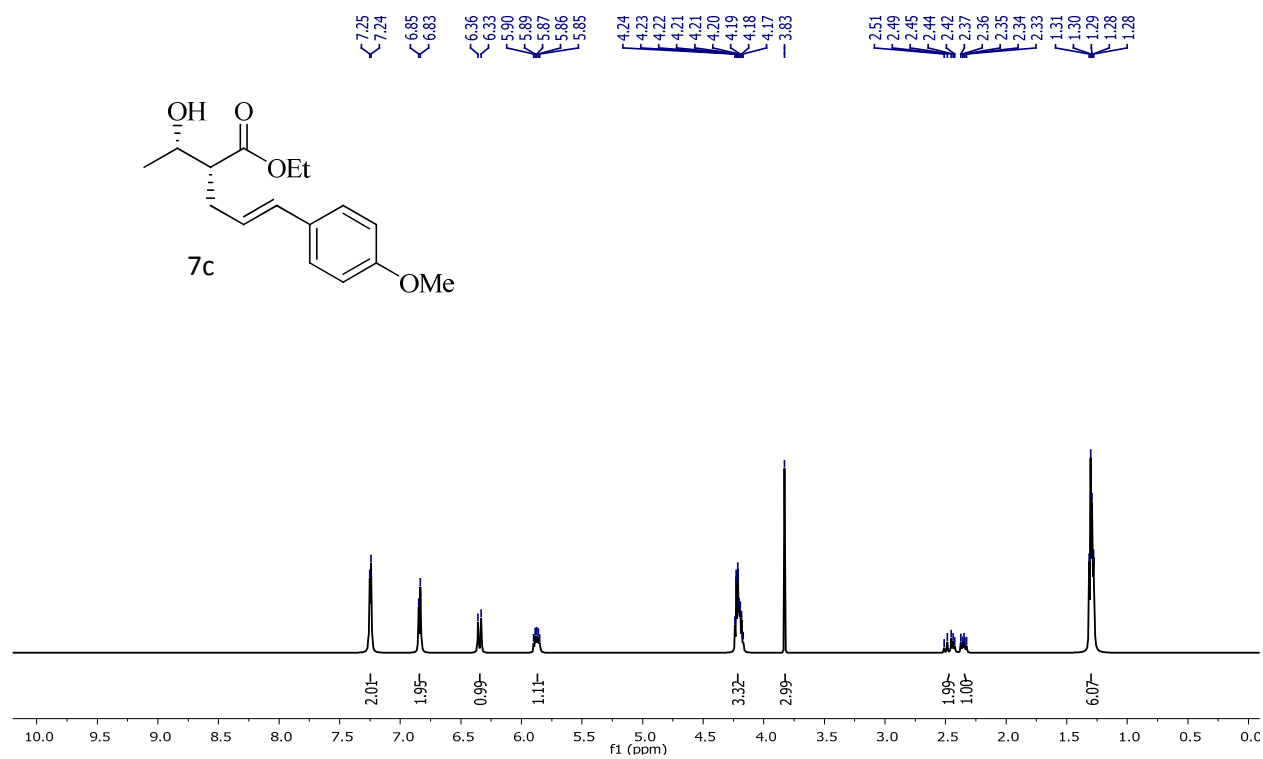

### $^{13}\text{C}$ NMR of compound (7c) (150 MHz, $\text{CDCl}_3$ )

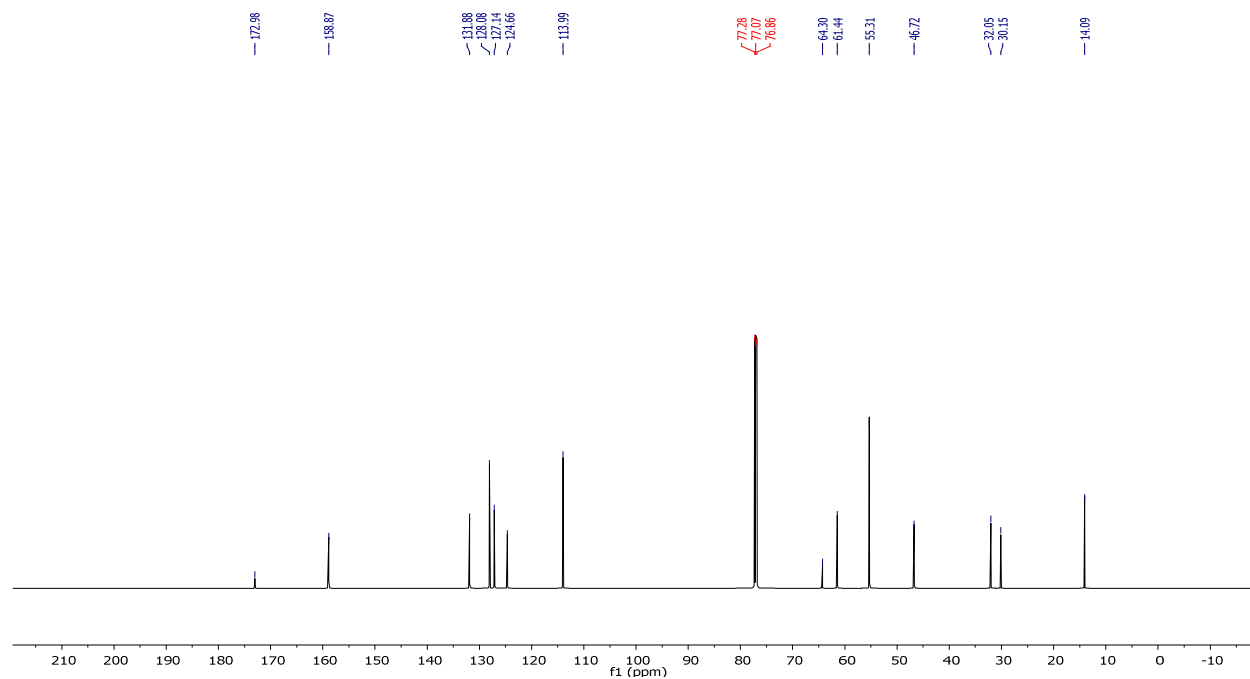

DEPT-135 of compound (7c) (150 MHz, CDCl<sub>3</sub>)

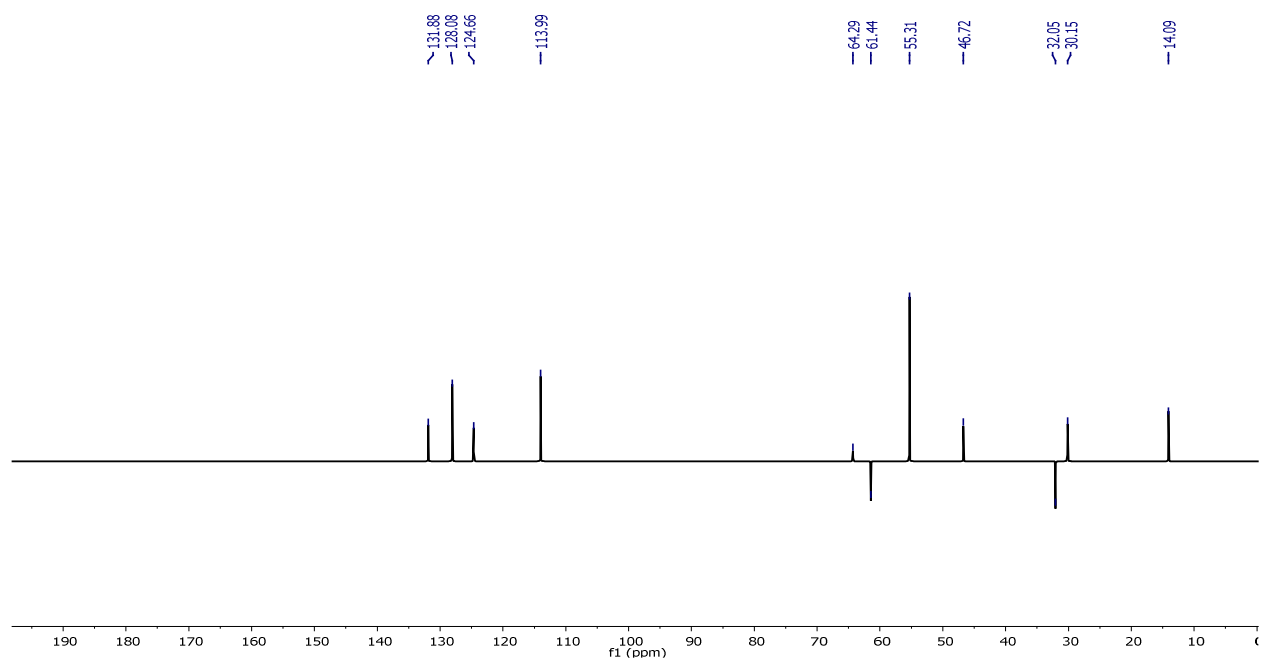

<sup>1</sup>H NMR of compound (7d) (400 MHz, CDCl<sub>3</sub>)

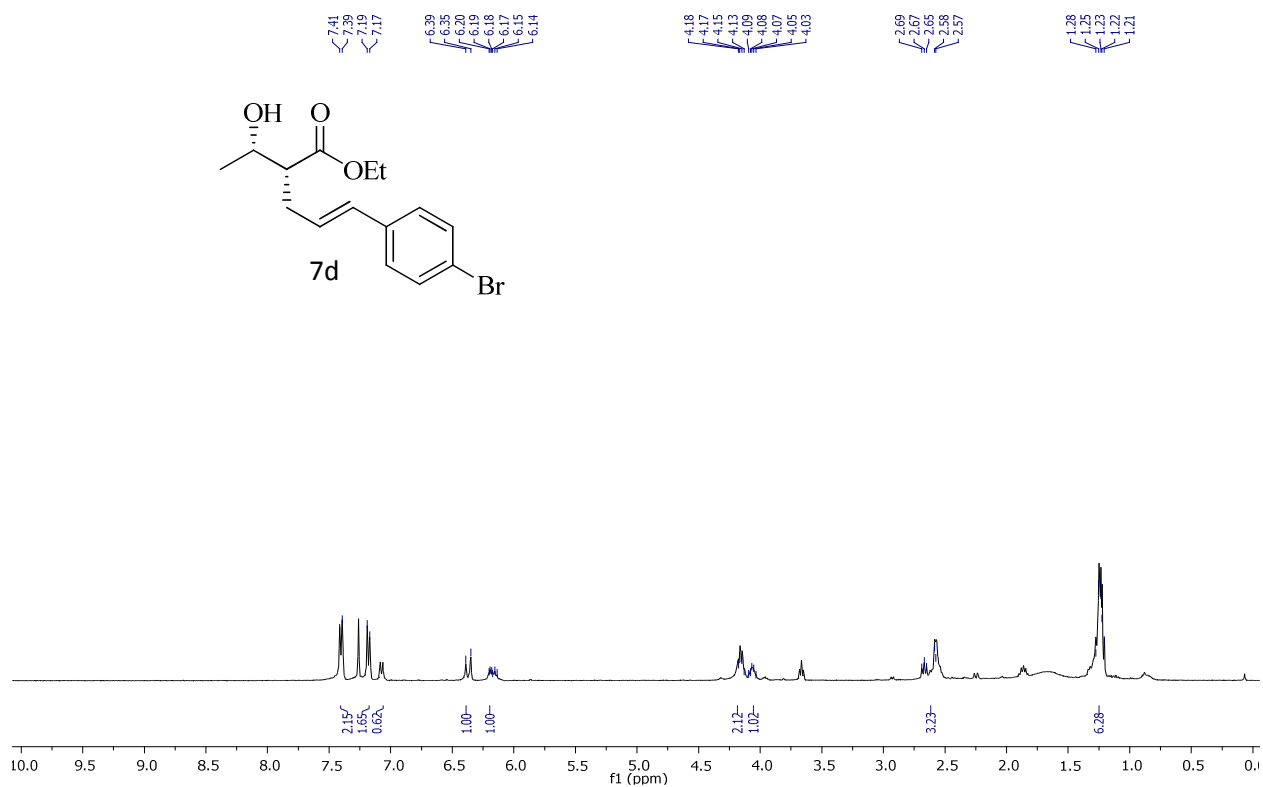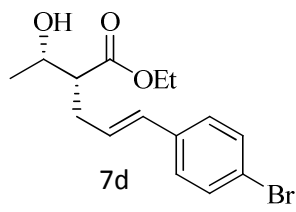

**$^{13}\text{C}$  NMR of compound (7d) (100 MHz,  $\text{CDCl}_3$ )**

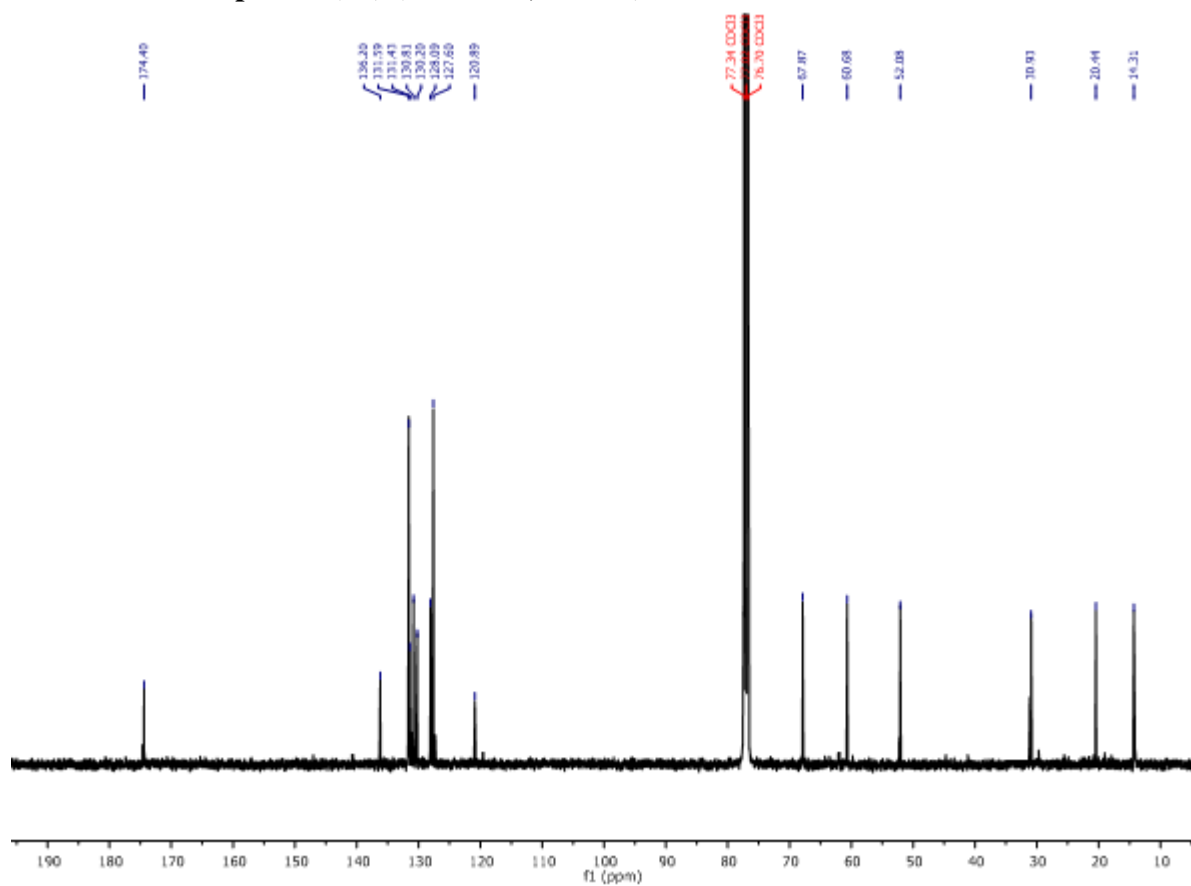

**DEPT-135 of compound (7d) (100 MHz,  $\text{CDCl}_3$ )**

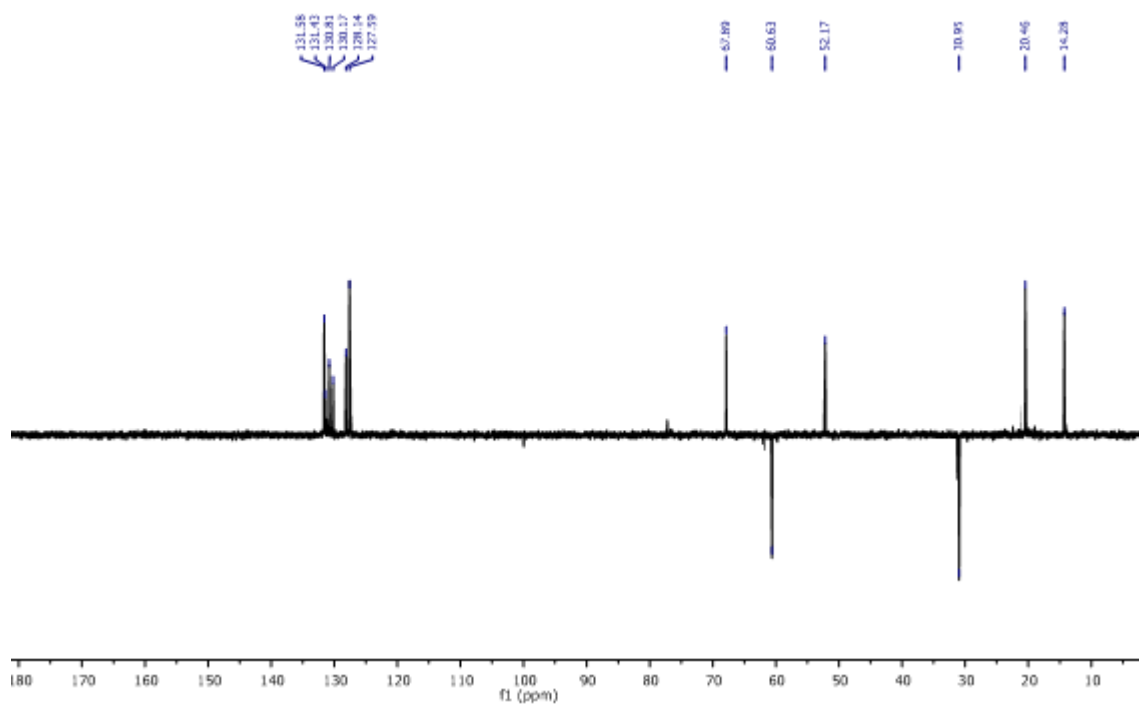



**<sup>1</sup>H NMR of compound (7e) (400 MHz, CDCl<sub>3</sub>)**

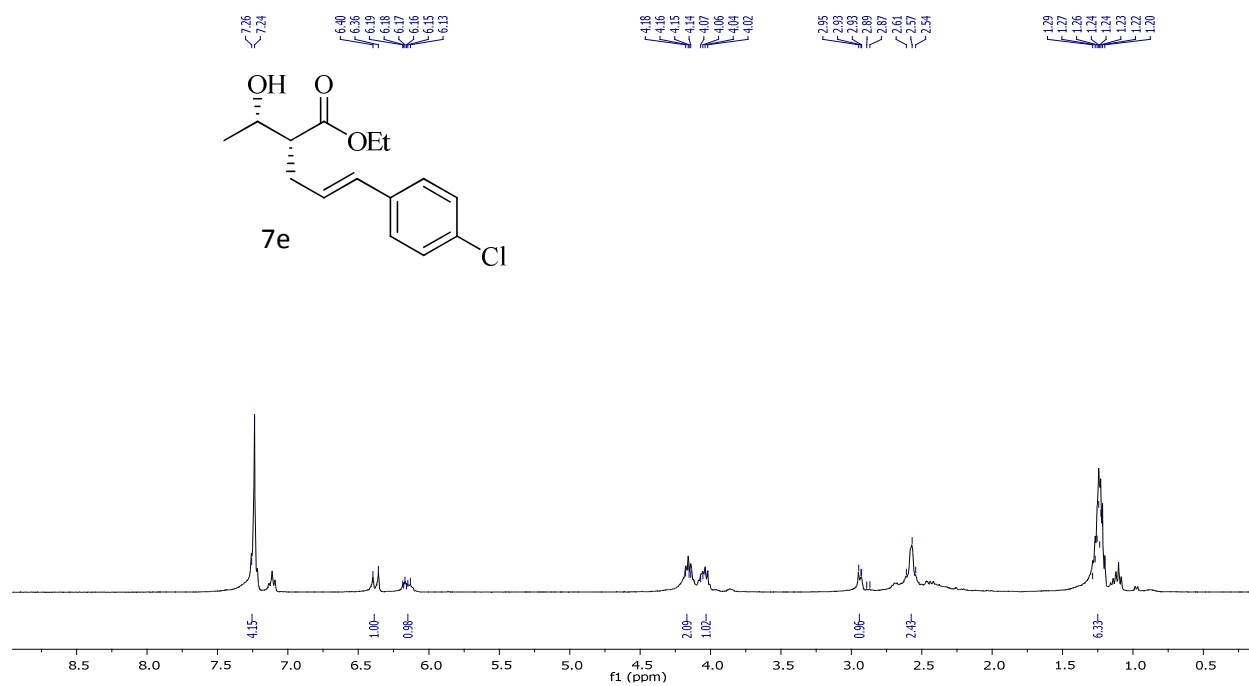

**<sup>13</sup>C NMR of compound (7e) (100 MHz, CDCl<sub>3</sub>)**

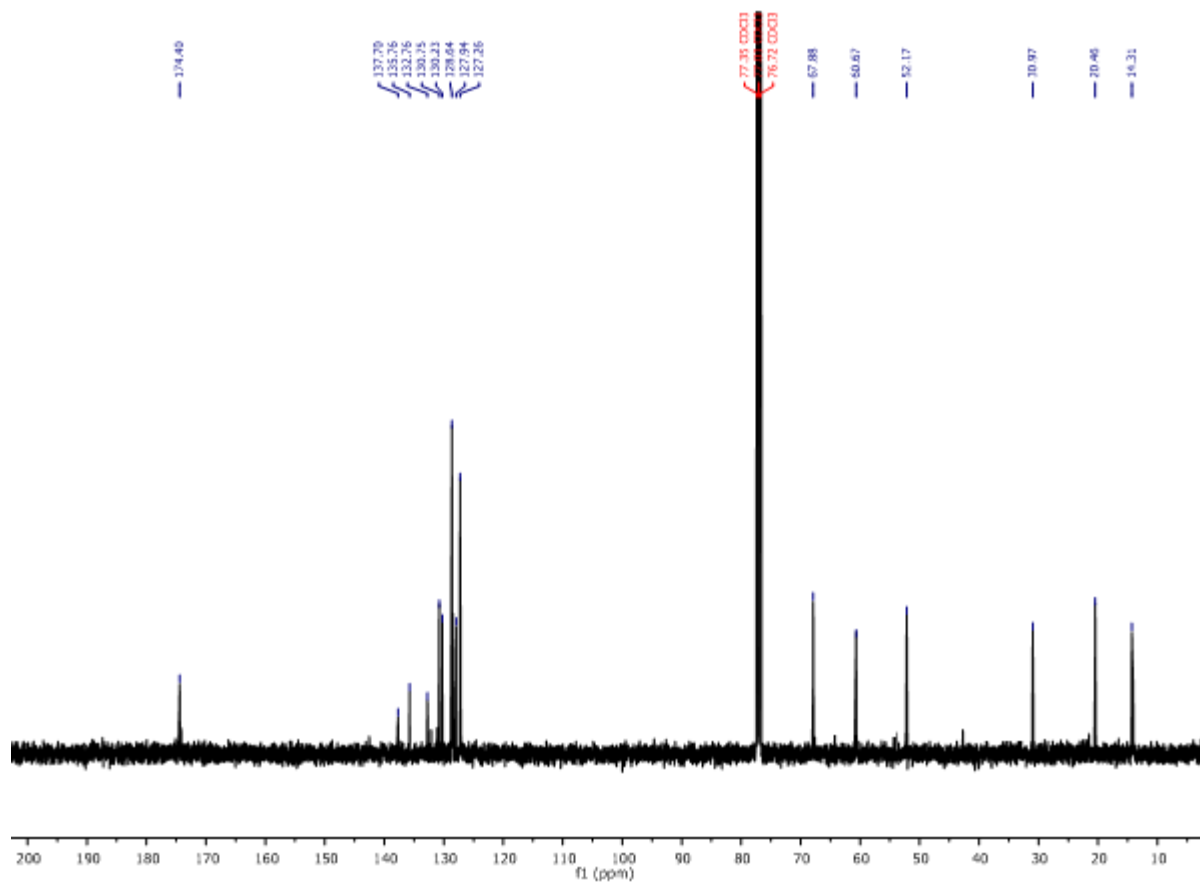

DEPT-135 of compound (7e) (50 MHz, CDCl<sub>3</sub>)

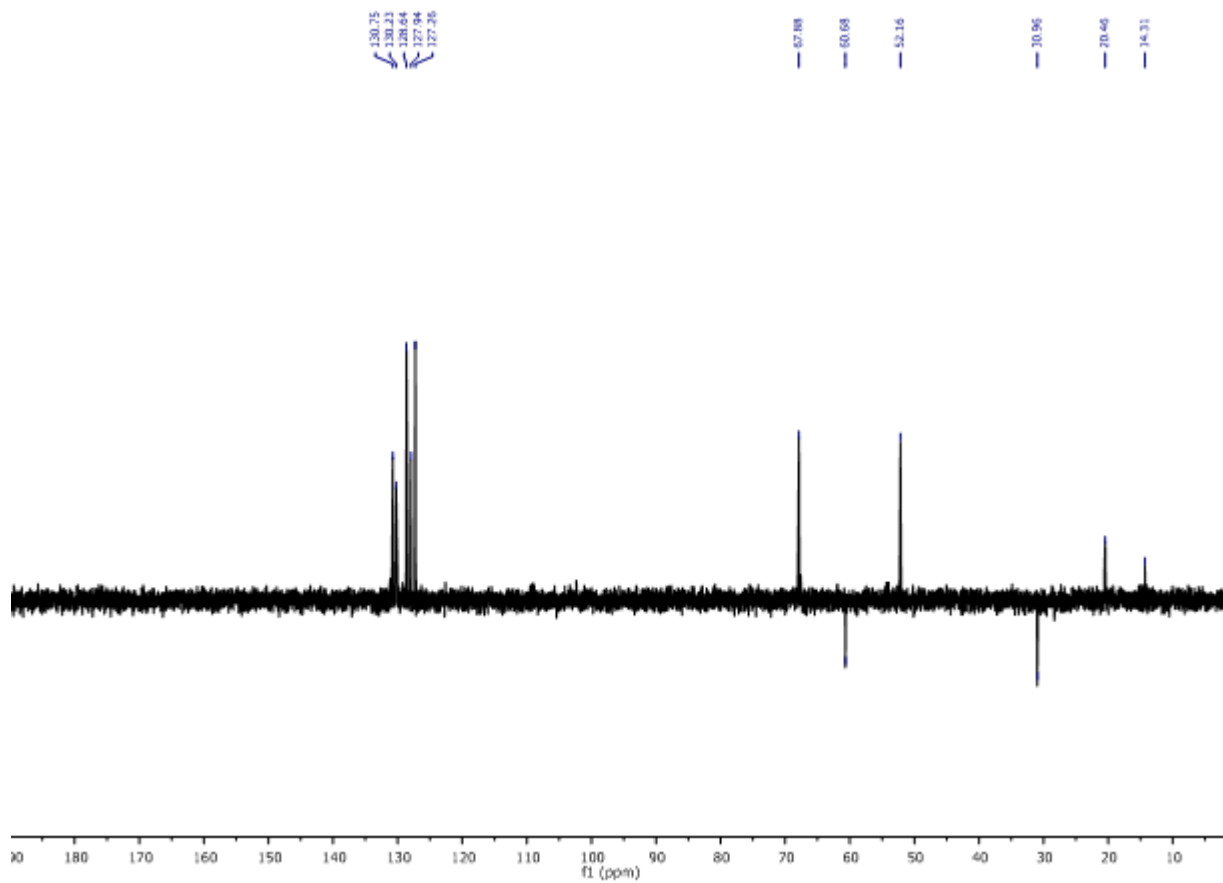

<sup>1</sup>H NMR of compound (7f) (600 MHz, CDCl<sub>3</sub>)

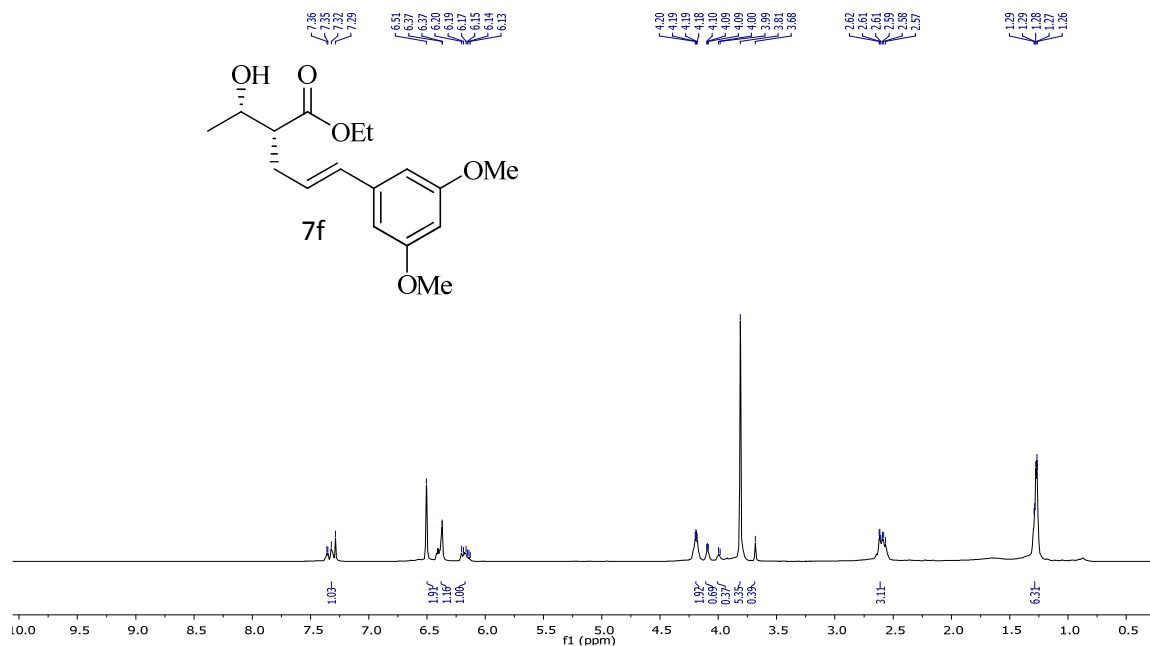

**$^{13}\text{C}$  NMR of compound (7f) (150 MHz,  $\text{CDCl}_3$ )**

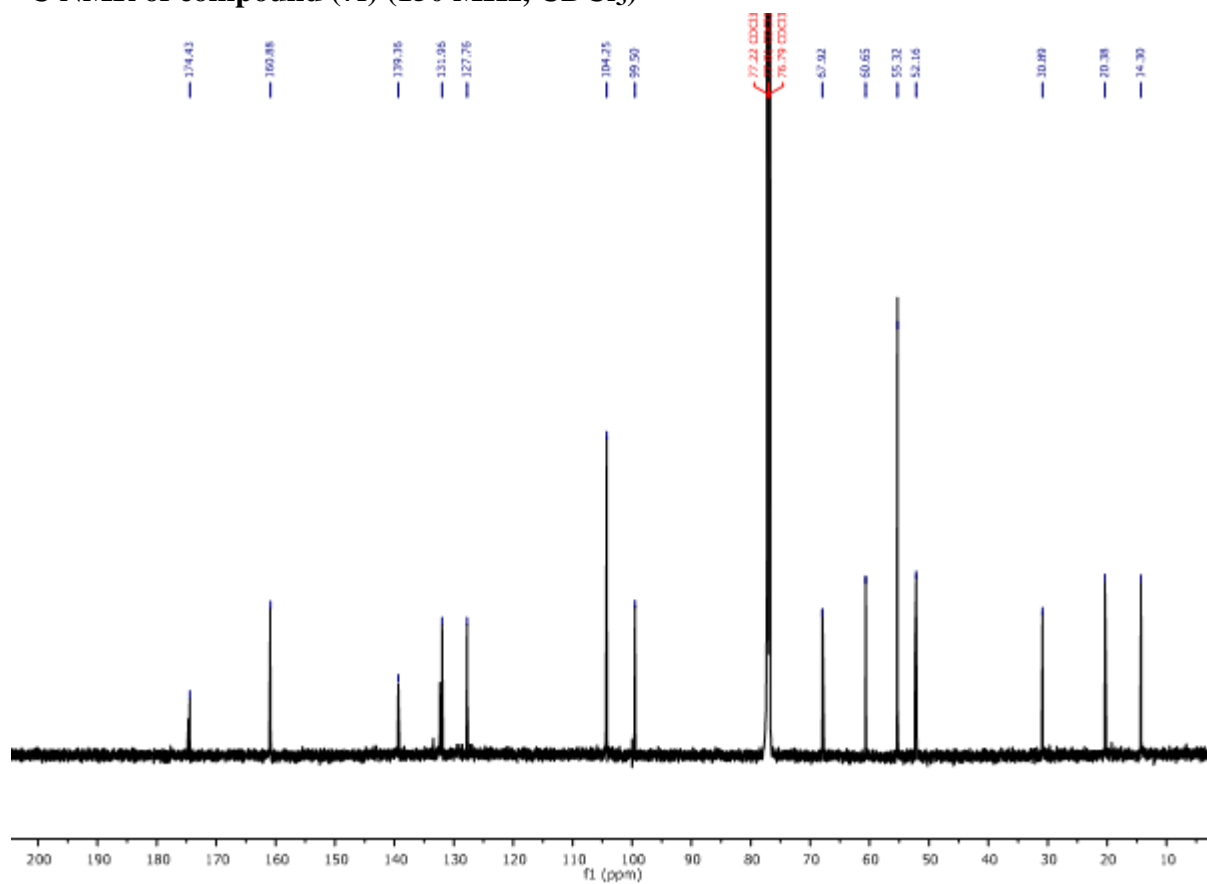

**DEPT-135 of compound (7f) (150 MHz,  $\text{CDCl}_3$ )**

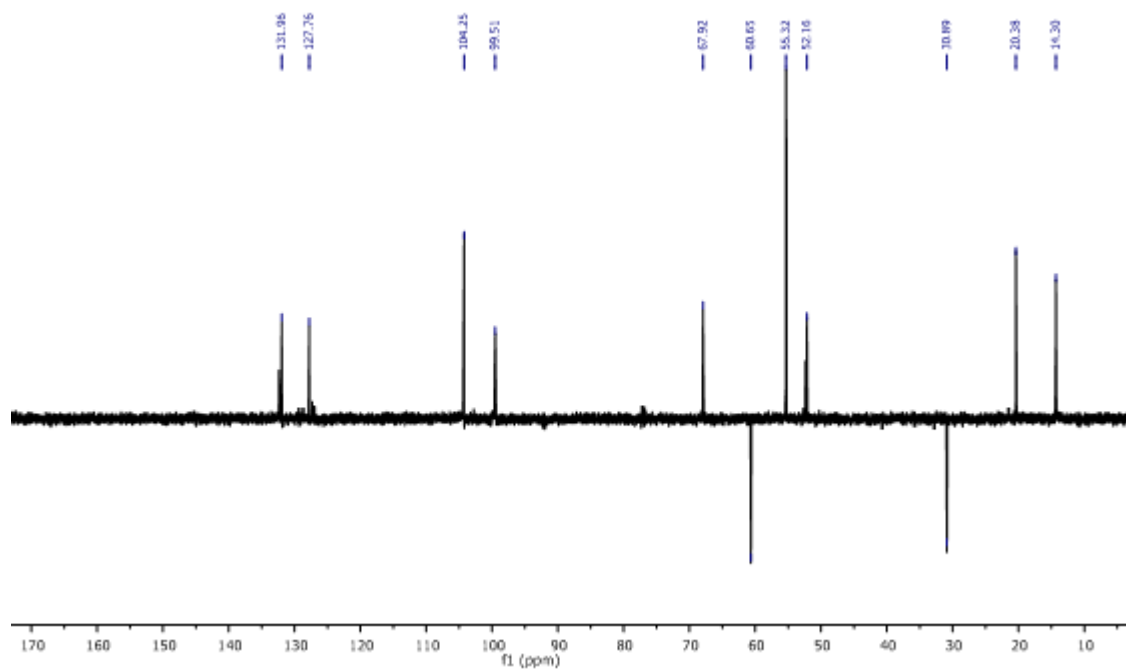

# <sup>1</sup>H NMR of compound (7g) (600 MHz, CDCl<sub>3</sub>)

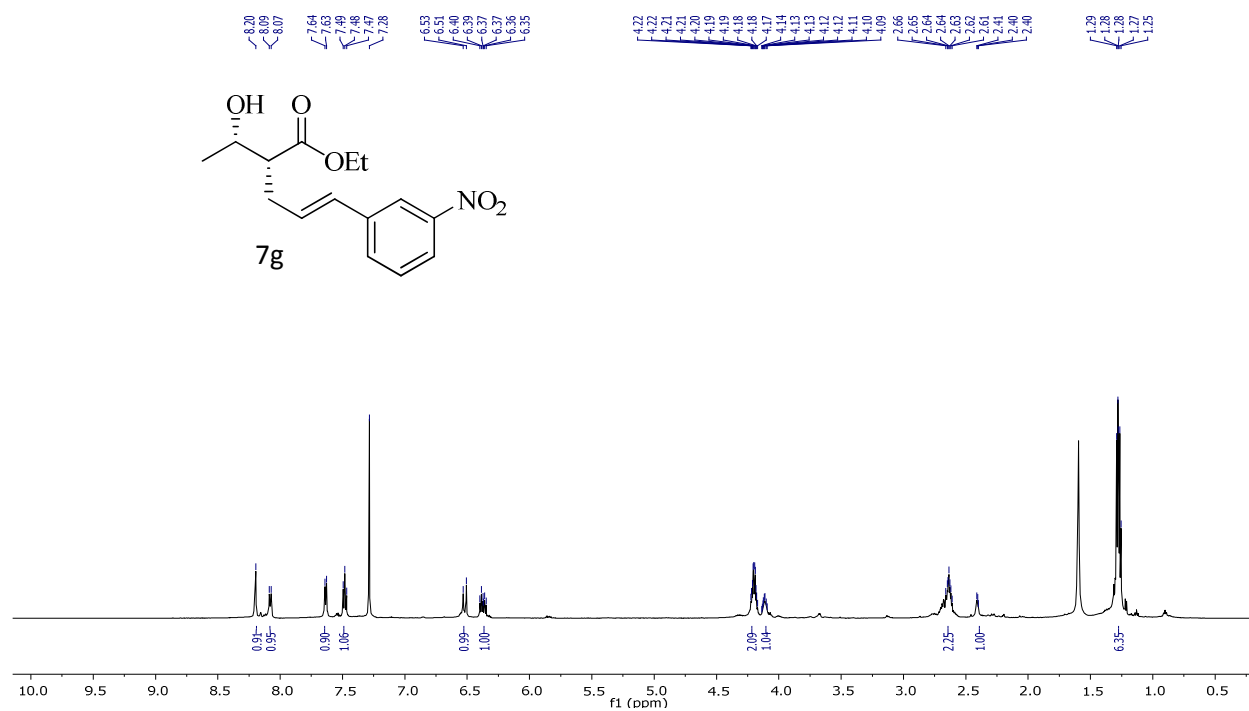

# <sup>13</sup>C NMR of compound (7g) (150 MHz, CDCl<sub>3</sub>)

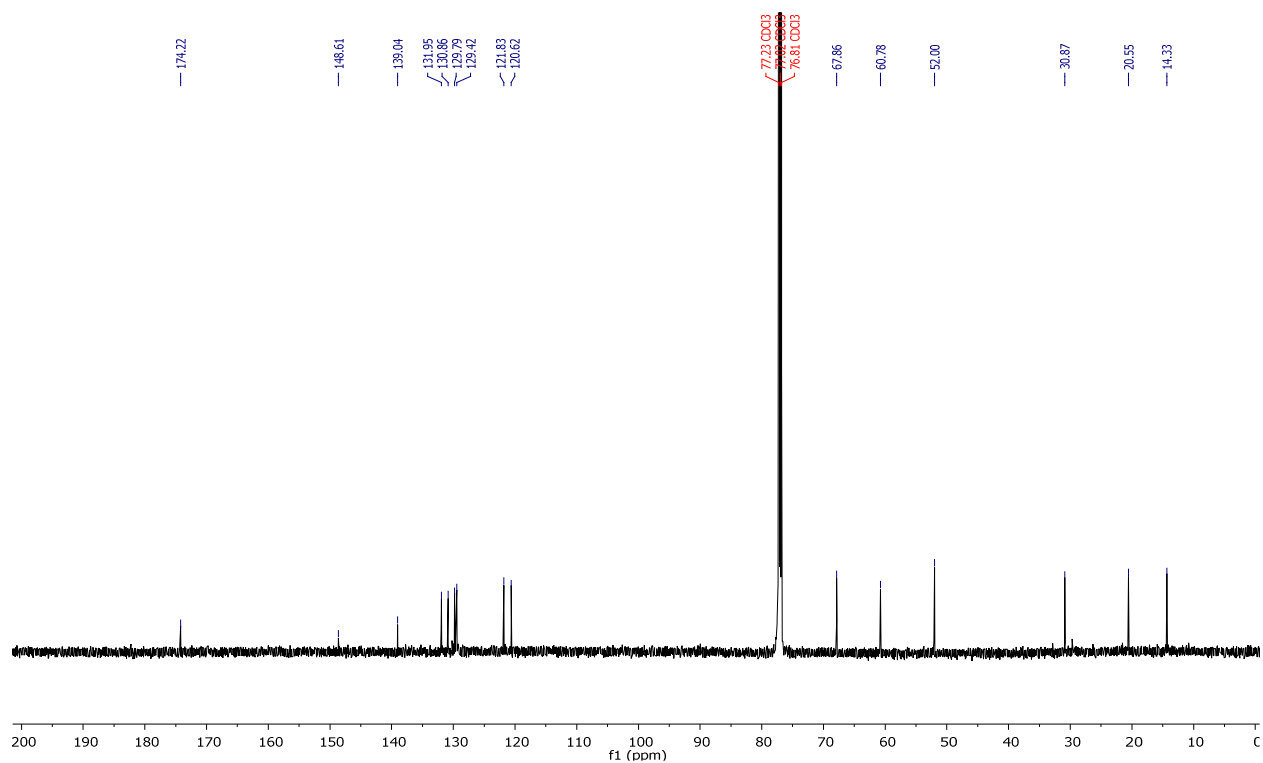

### DEPT-135 of compound (7g) (150 MHz, CDCl<sub>3</sub>)

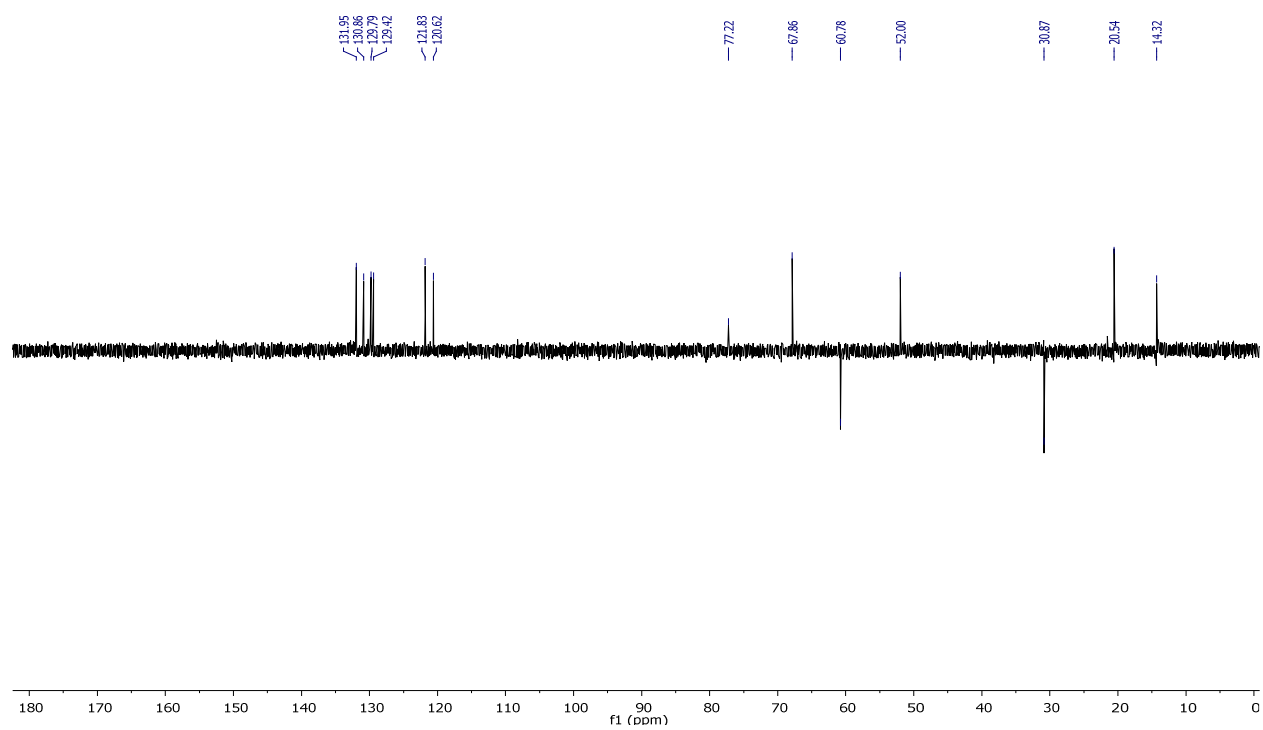

### <sup>1</sup>H NMR of compound (7h) (600 MHz, CDCl<sub>3</sub>)

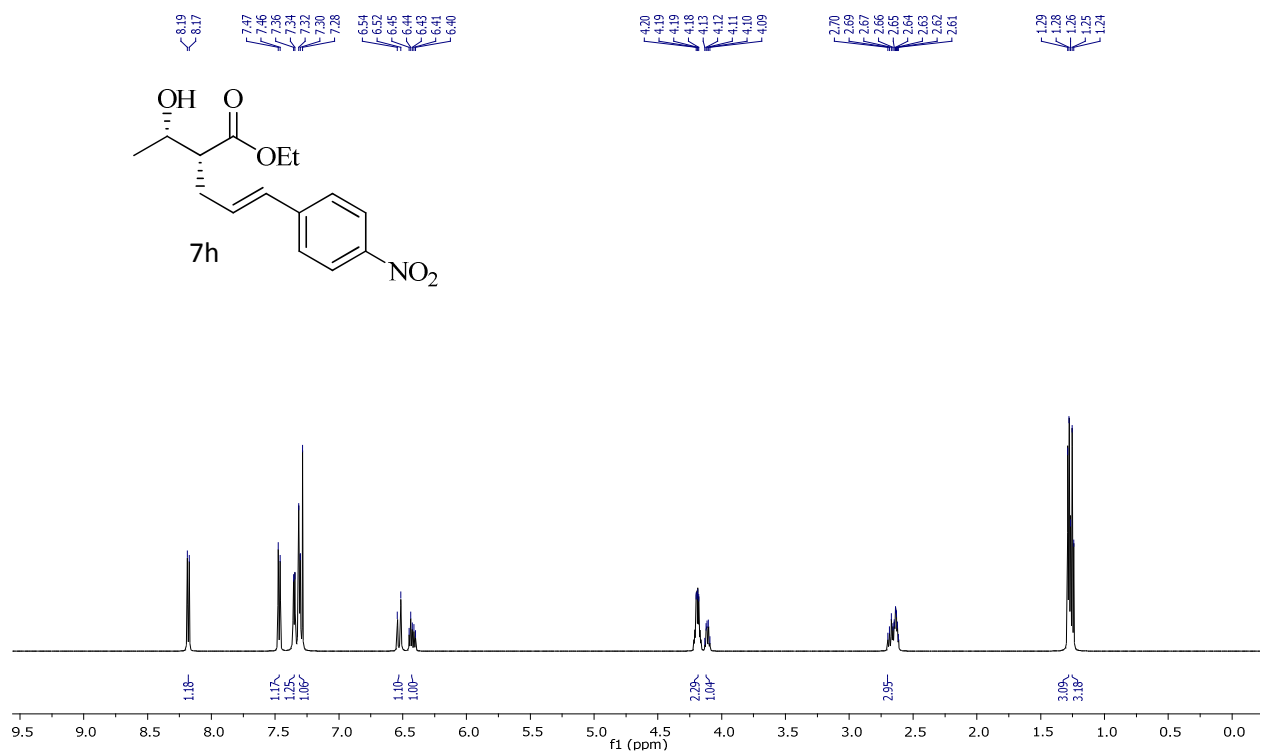

**$^{13}\text{C}$  NMR of compound (7h) (150 MHz,  $\text{CDCl}_3$ )**

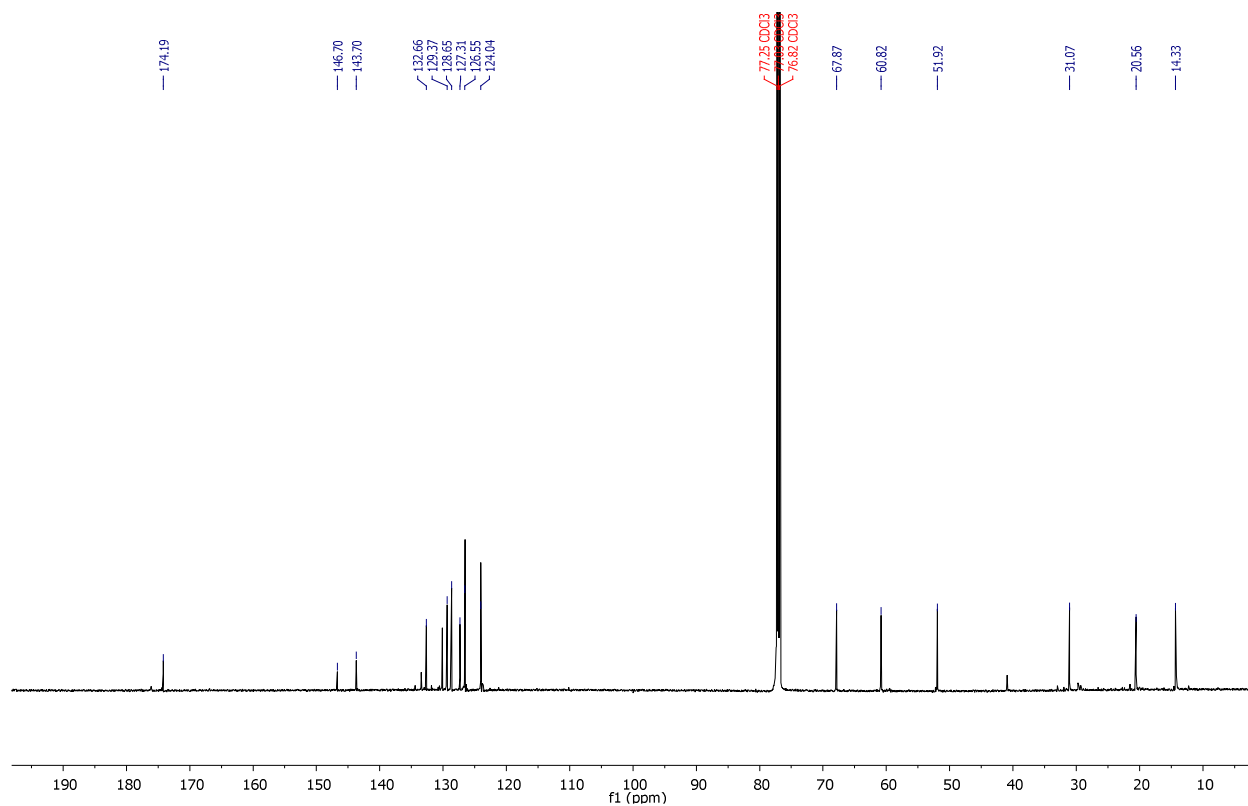

**DEPT-135 of compound (7h) (150 MHz,  $\text{CDCl}_3$ )**

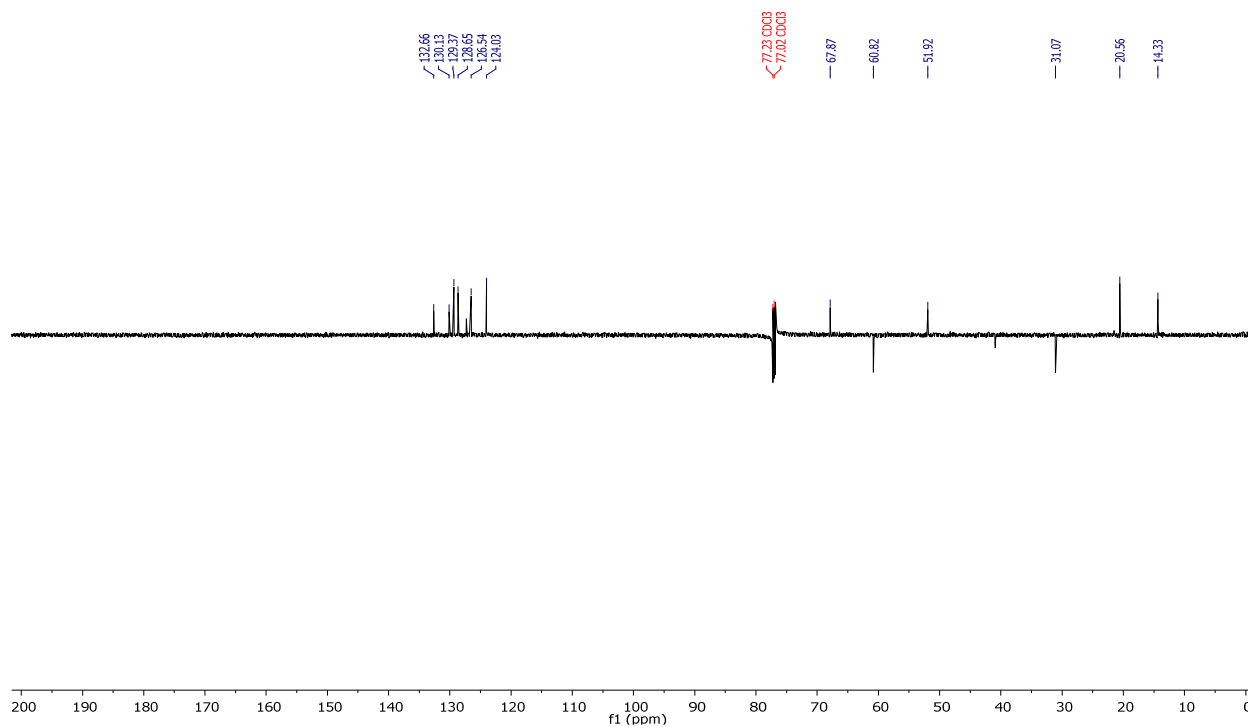

# <sup>1</sup>H NMR of compound (7i) (600 MHz, CDCl<sub>3</sub>)

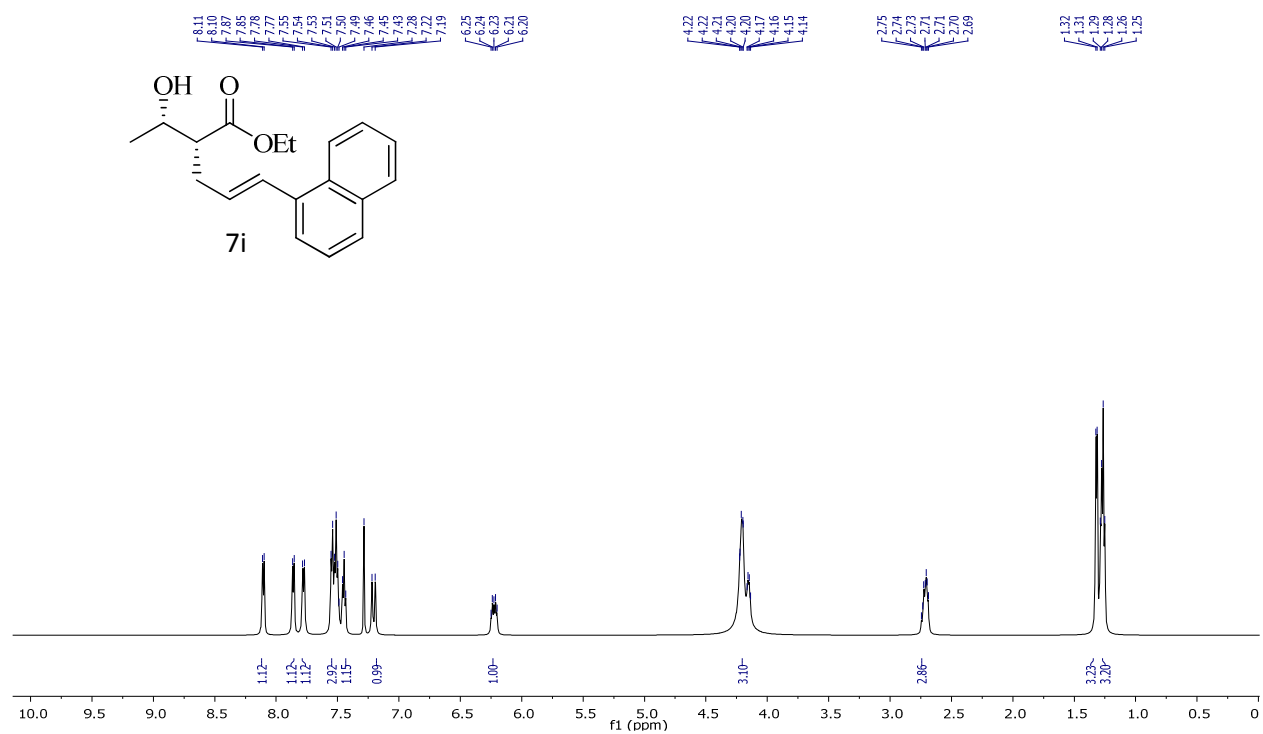

# <sup>13</sup>C NMR of compound (7i) (150 MHz, CDCl<sub>3</sub>)

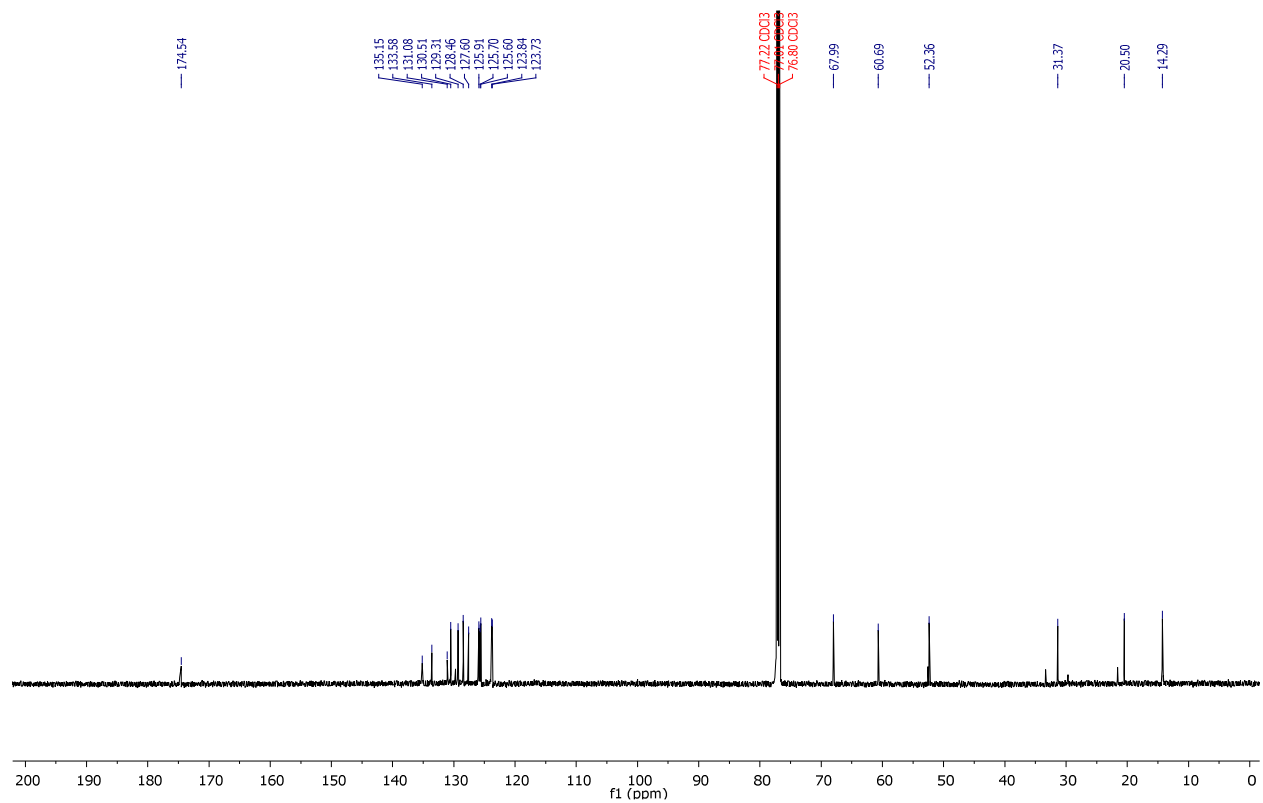

DEPT-135 of compound (7i) (150 MHz, CDCl<sub>3</sub>)

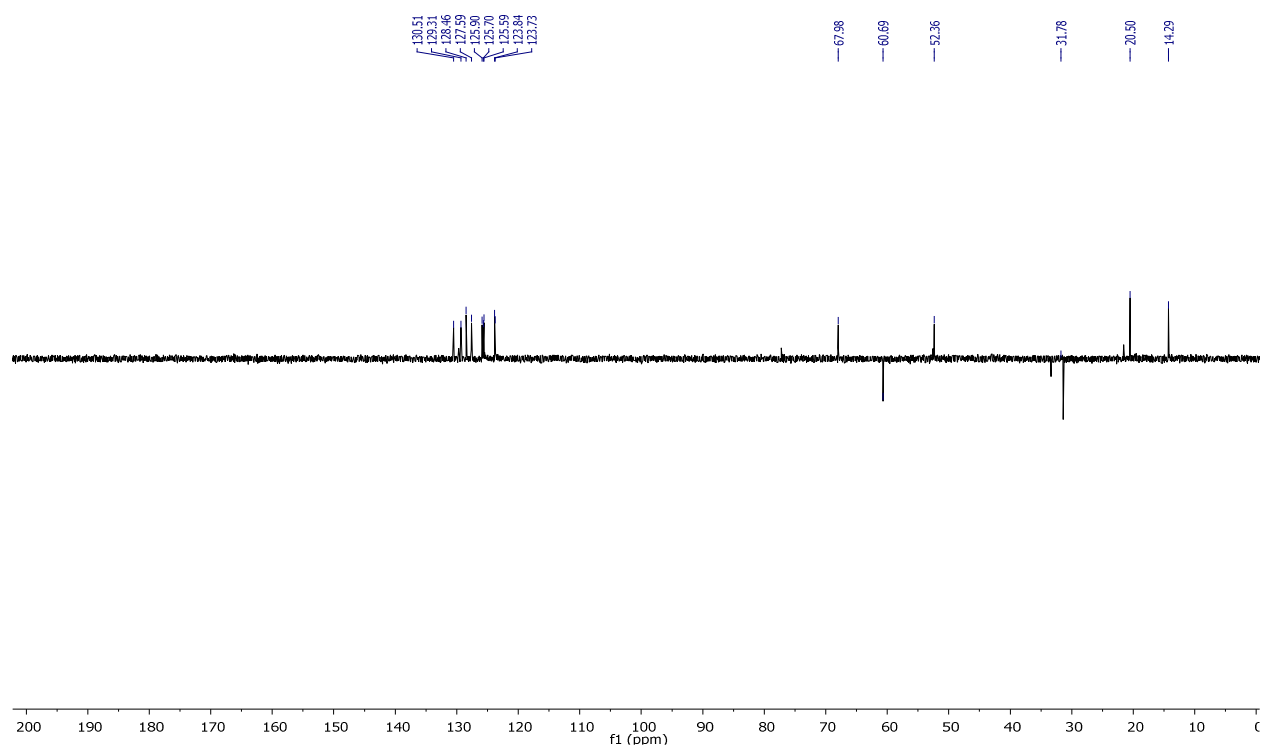

<sup>1</sup>H NMR of compound (7j) (600 MHz, CDCl<sub>3</sub>)

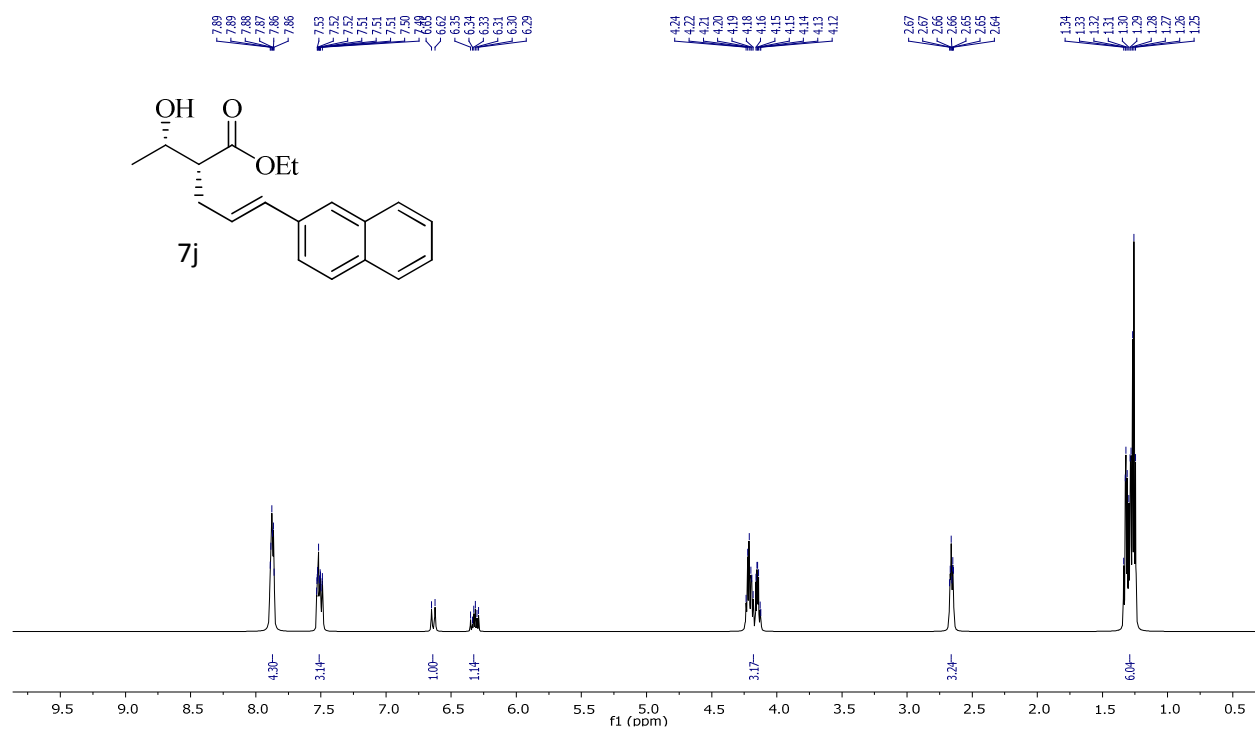



**$^{13}\text{C}$  NMR of compound (7j) (150 MHz,  $\text{CDCl}_3$ )**

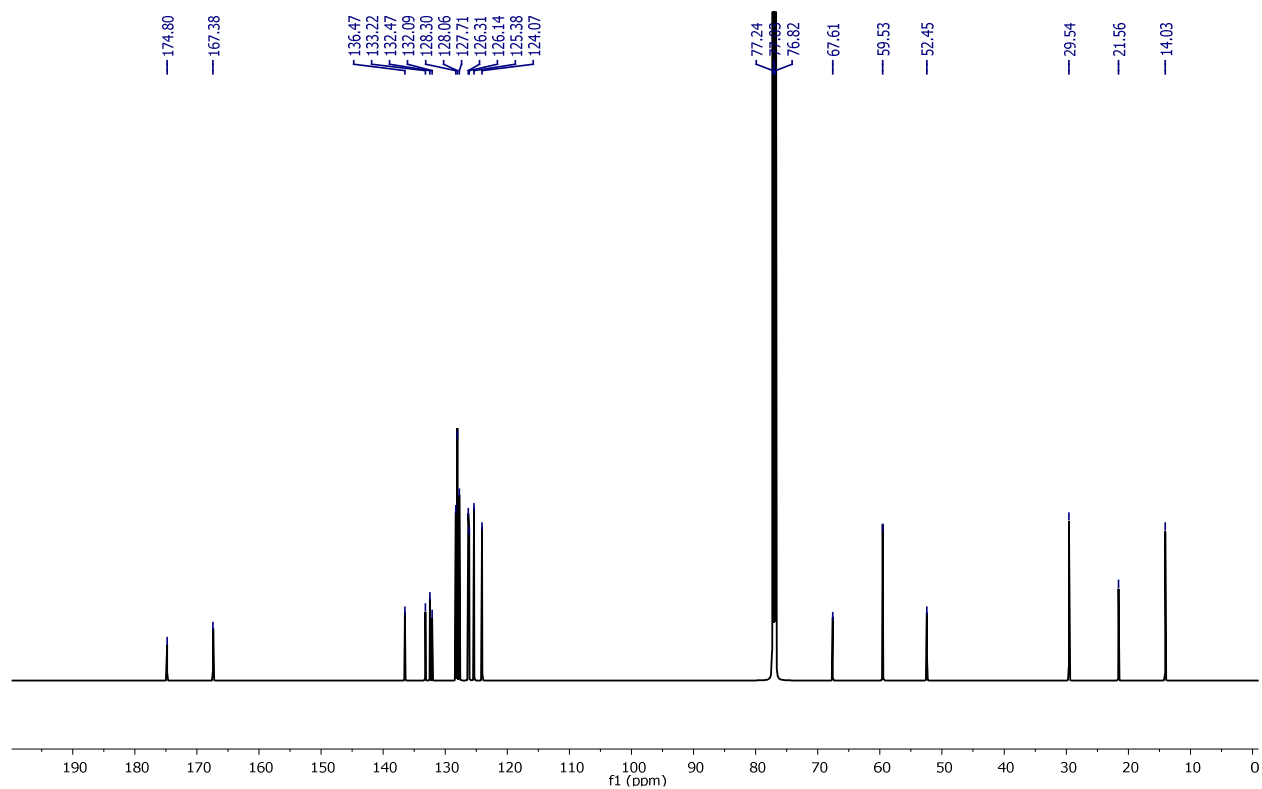

**DEPT-135 of compound (7j) (150 MHz,  $\text{CDCl}_3$ )**

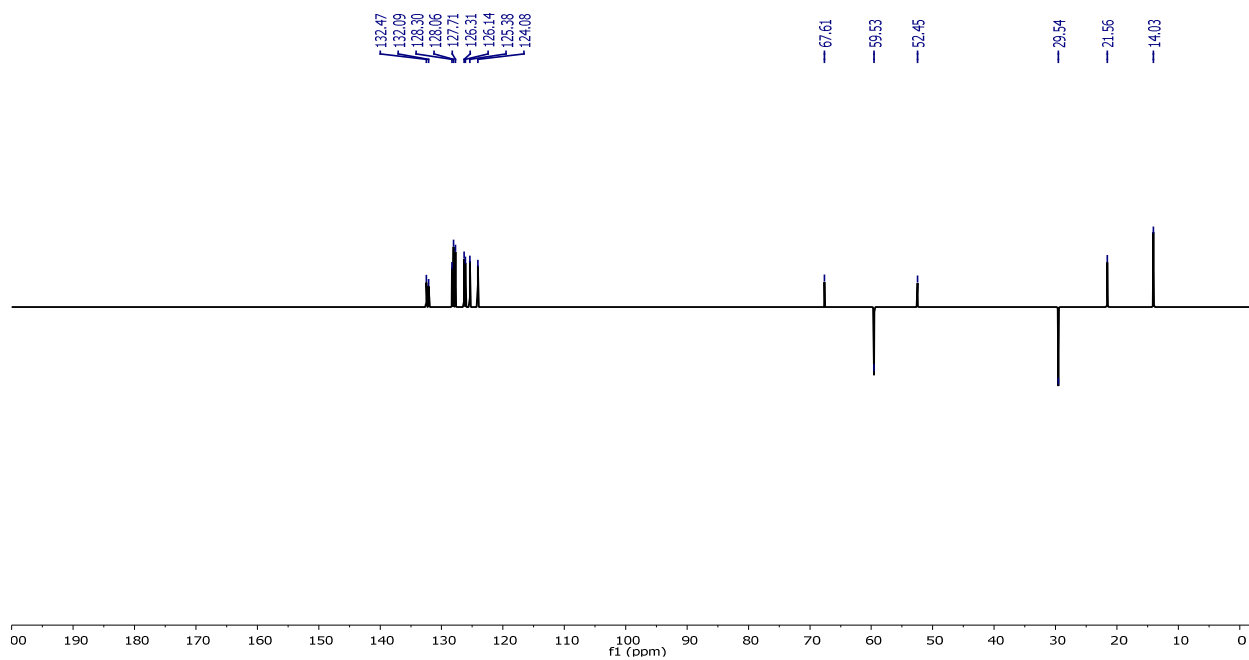

### $^1\text{H}$ NMR of compound (7k) (600 MHz, $\text{CDCl}_3$ )

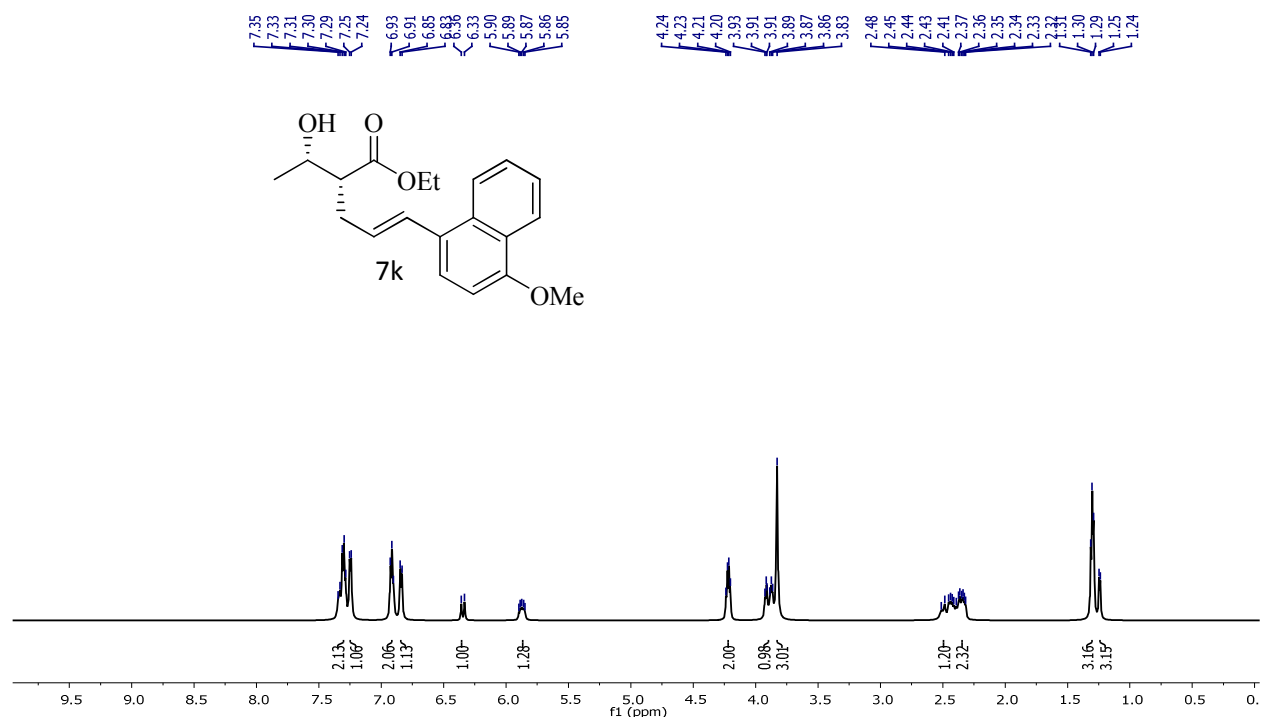

### $^{13}\text{C}$ NMR of compound (7k) (150 MHz, $\text{CDCl}_3$ )

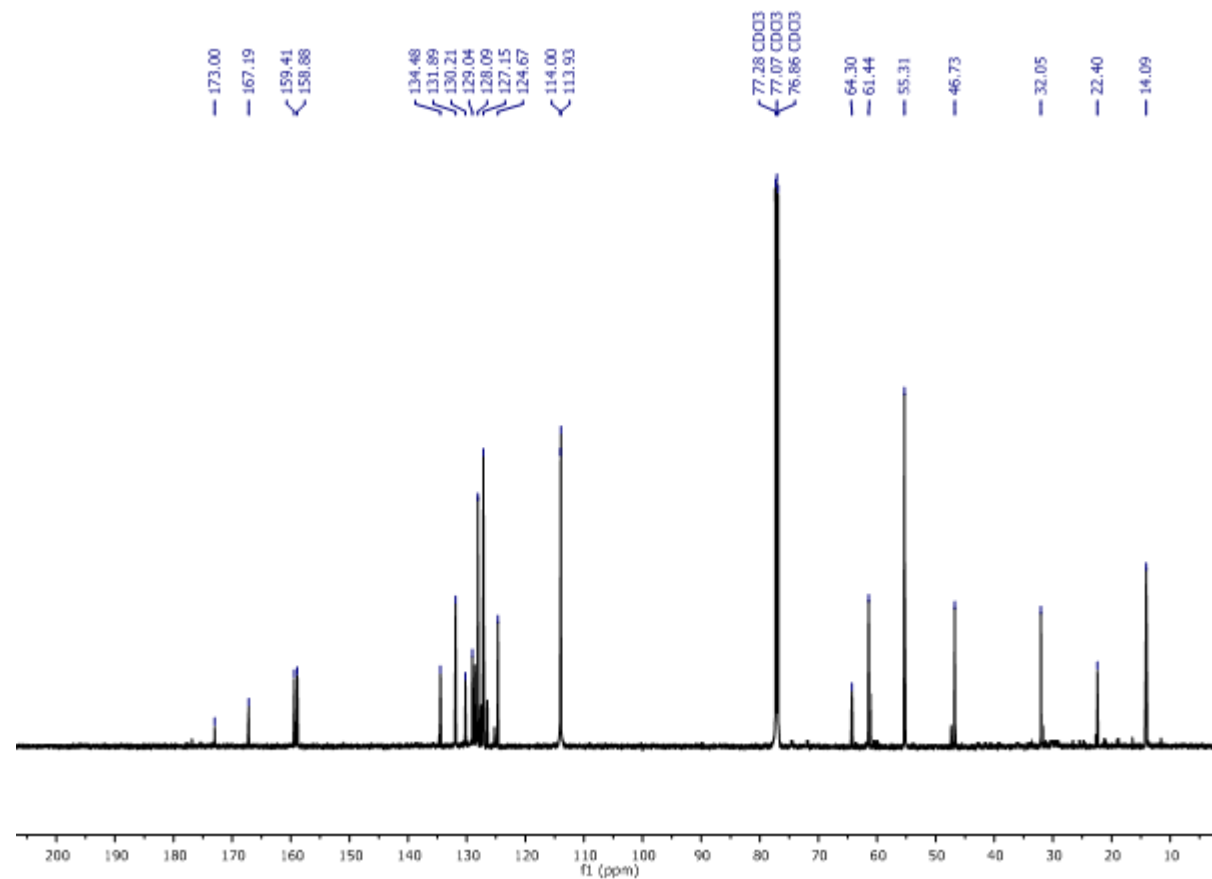

DEPT-135 of compound (7k) (150 MHz, CDCl<sub>3</sub>)

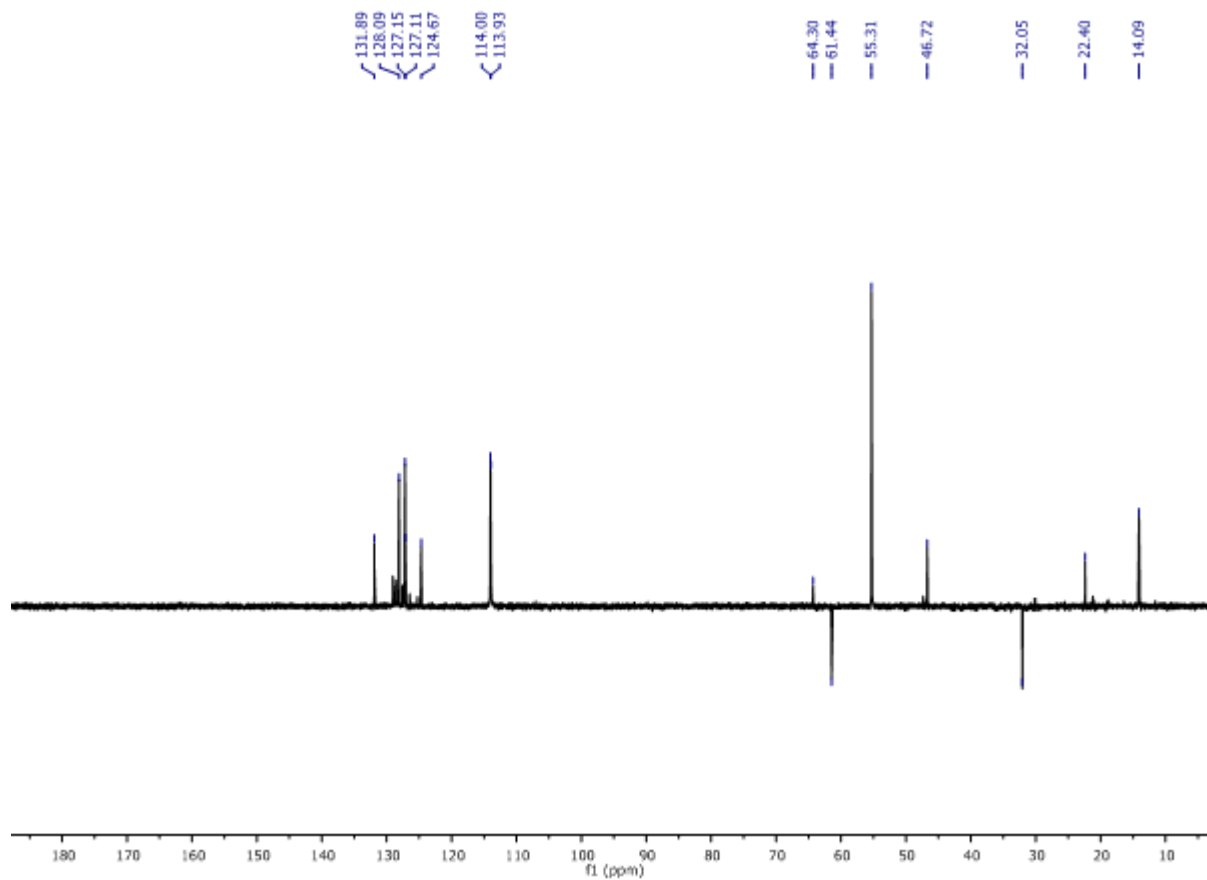

<sup>1</sup>H NMR of compound (7l) (600 MHz, CDCl<sub>3</sub>)

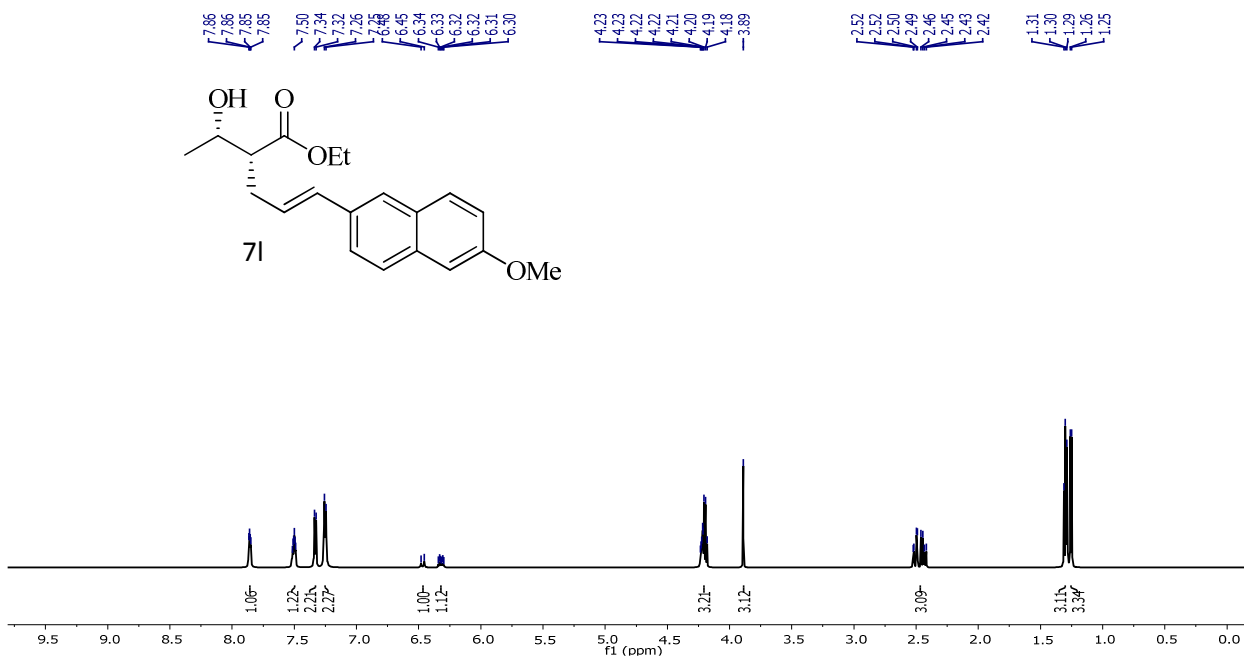

**$^{13}\text{C}$  NMR of compound (71) (150 MHz,  $\text{CDCl}_3$ )**

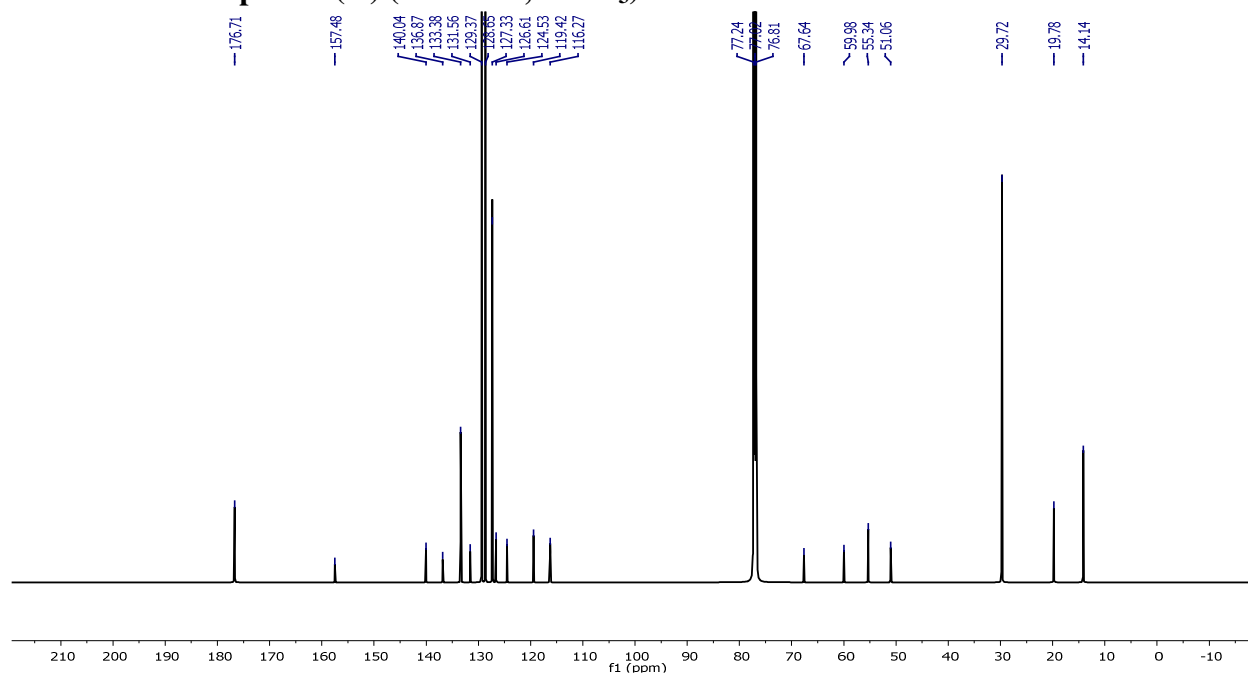

**DEPT-135 of compound (71) (150 MHz,  $\text{CDCl}_3$ )**

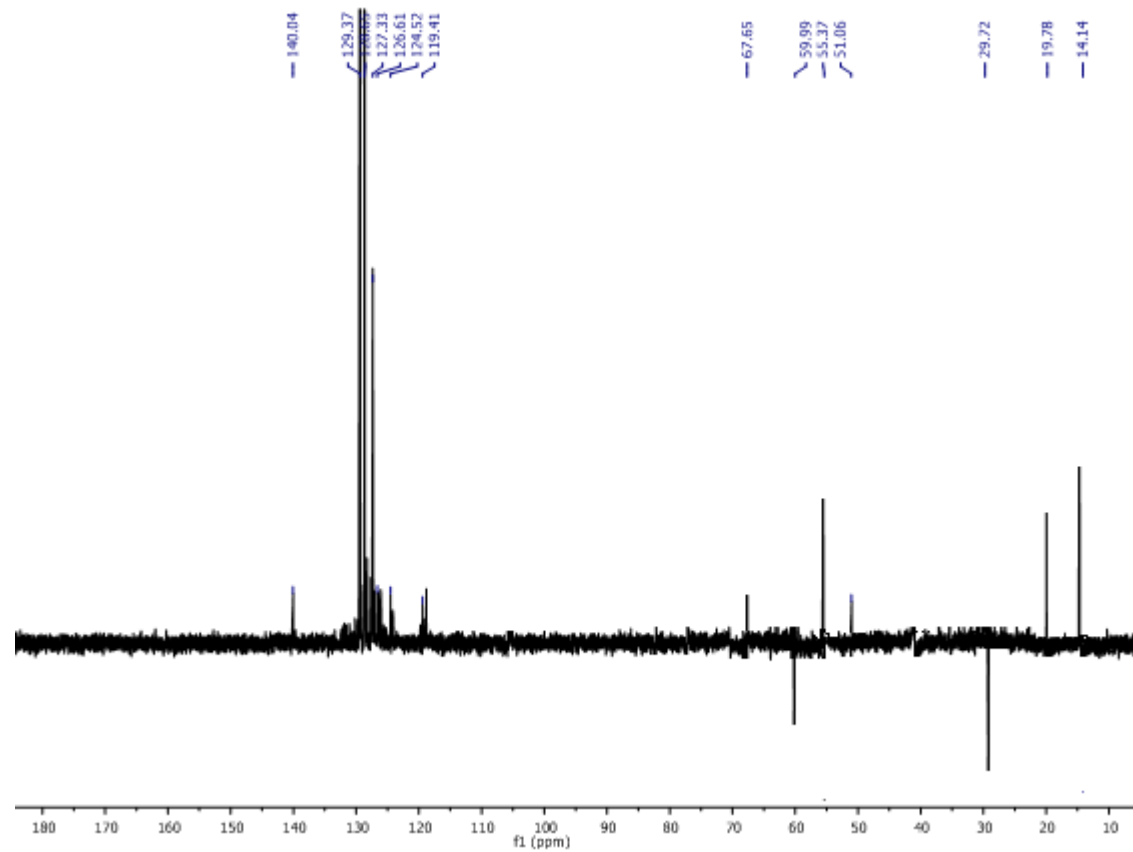

### $^1\text{H}$ NMR of compound (7m) (400 MHz, $\text{CDCl}_3$ )

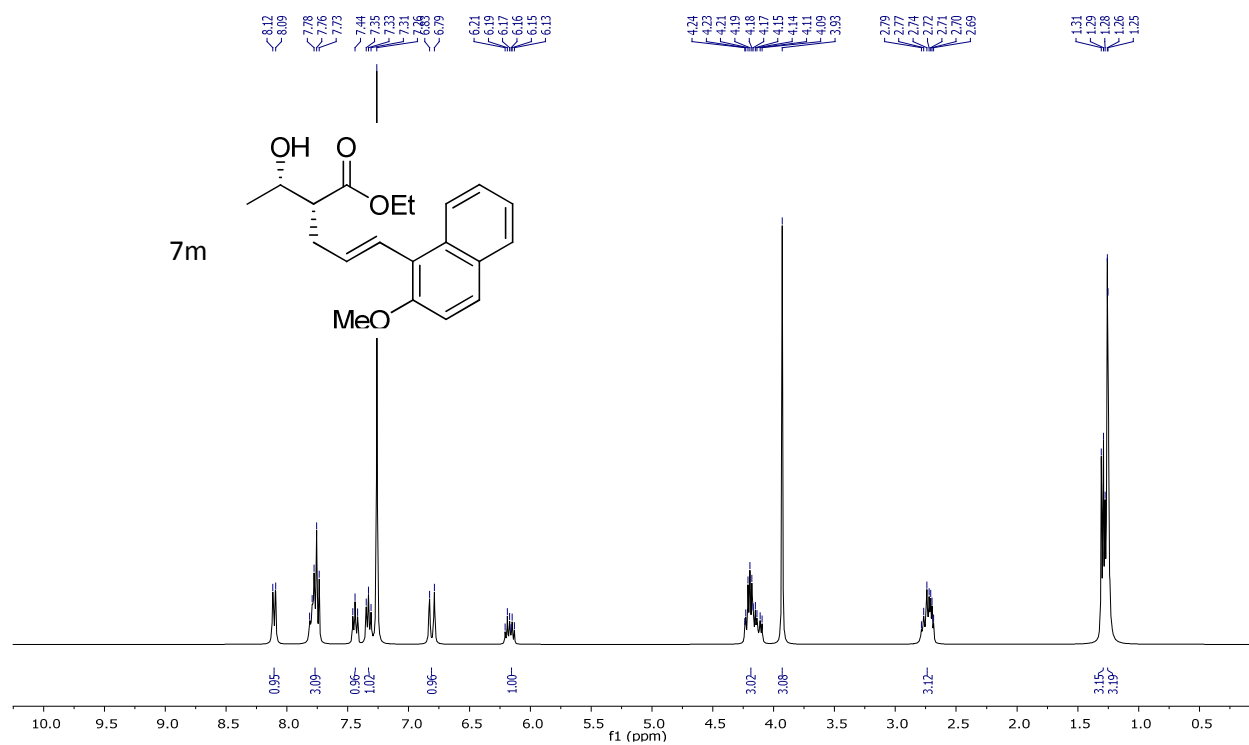

### $^{13}\text{C}$ NMR of compound (7m) (150 MHz, $\text{CDCl}_3$ )

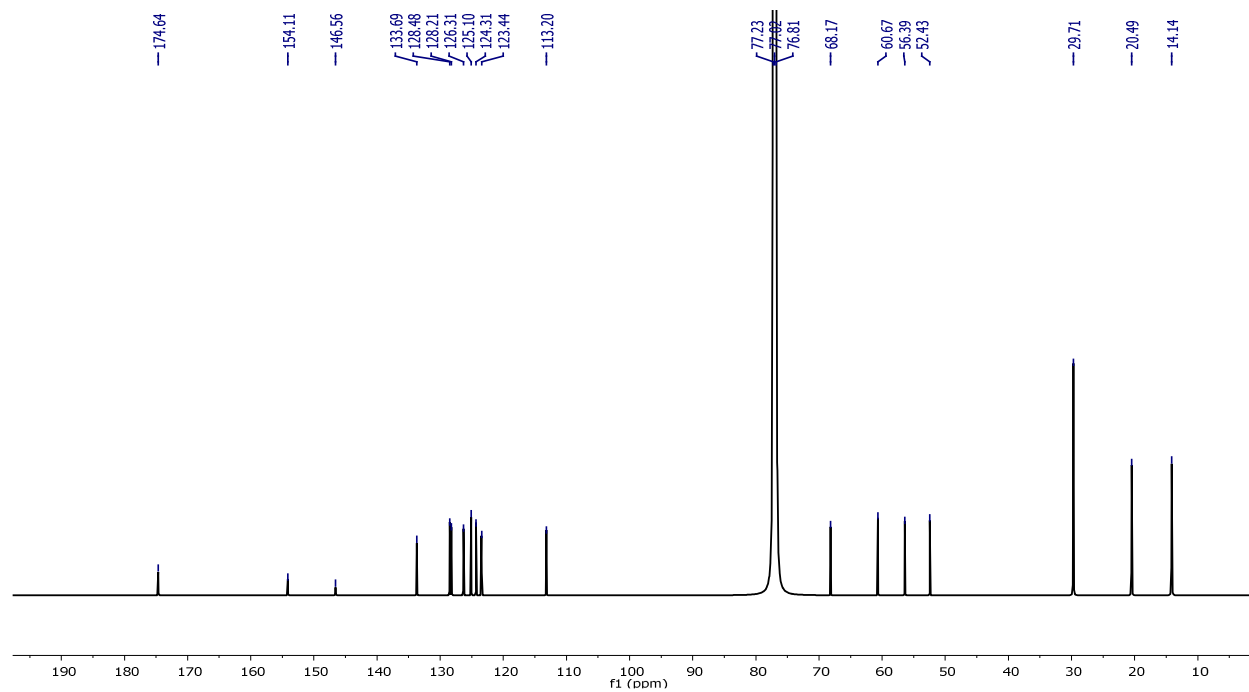

DEPT-135 of compound (7m) (100 MHz, CDCl<sub>3</sub>)

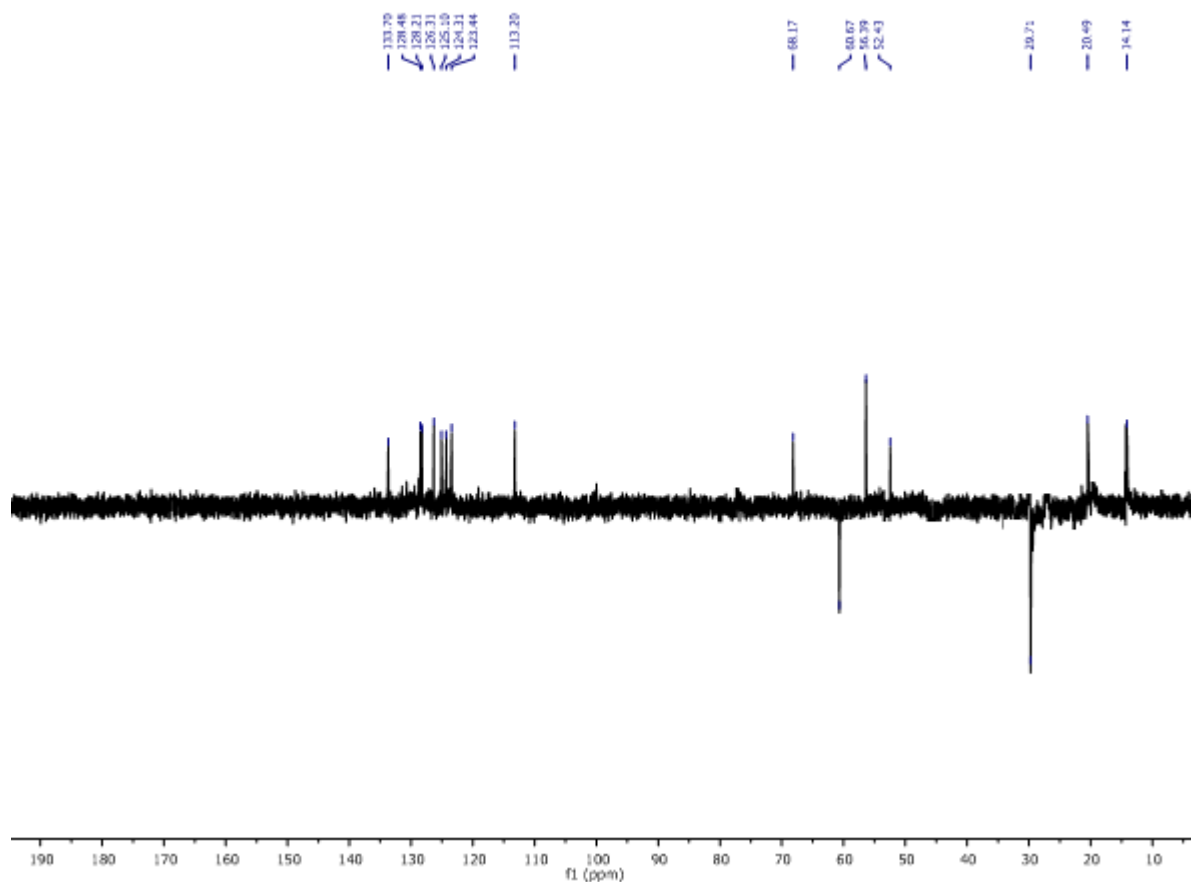

<sup>1</sup>H NMR of compound (7n) (400 MHz, CDCl<sub>3</sub>)

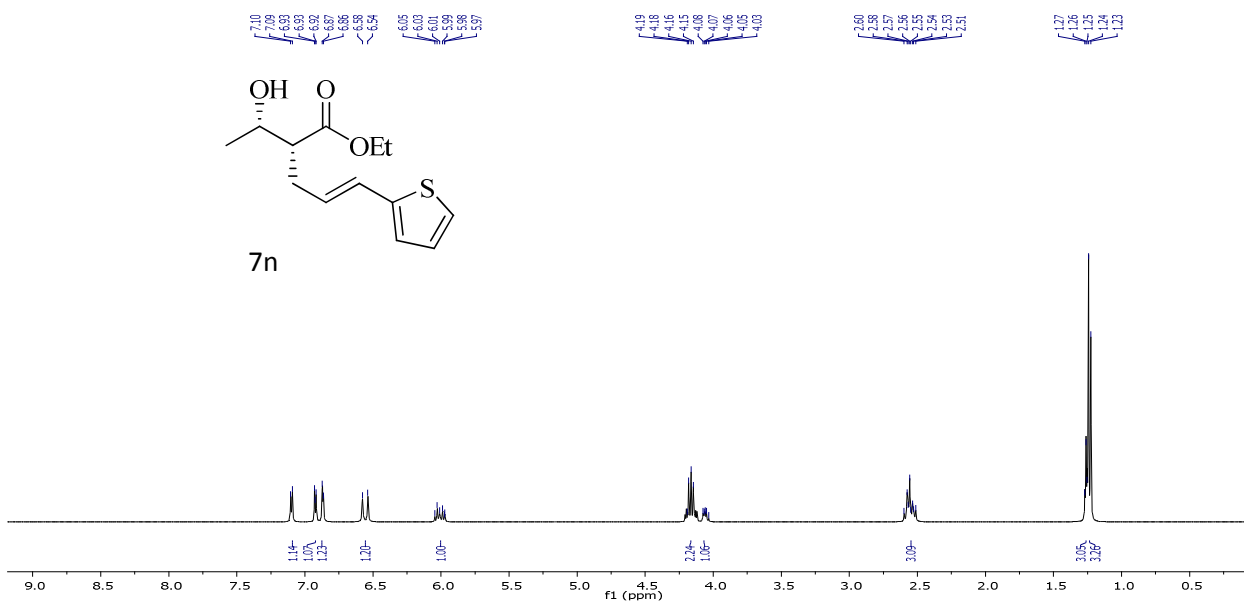

**$^{13}\text{C}$  NMR of compound (7n) (100 MHz,  $\text{CDCl}_3$ )**

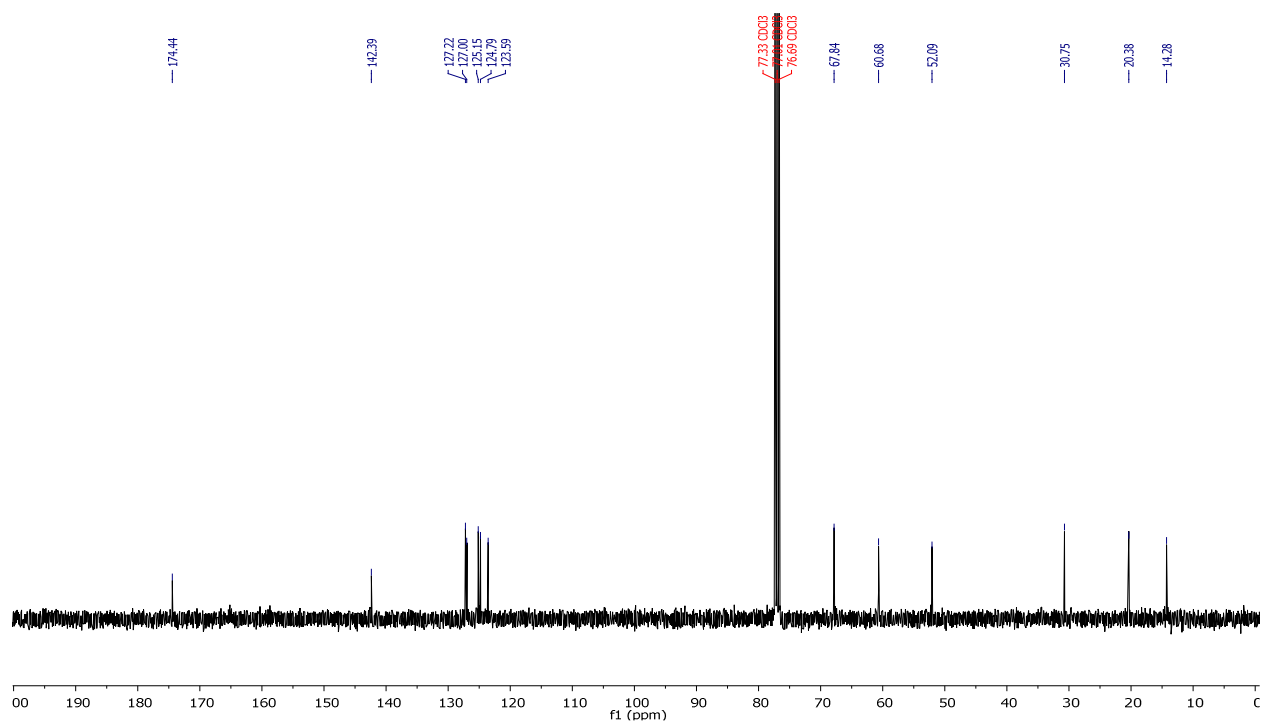

**DEPT-135 of compound (7n) (100 MHz,  $\text{CDCl}_3$ )**

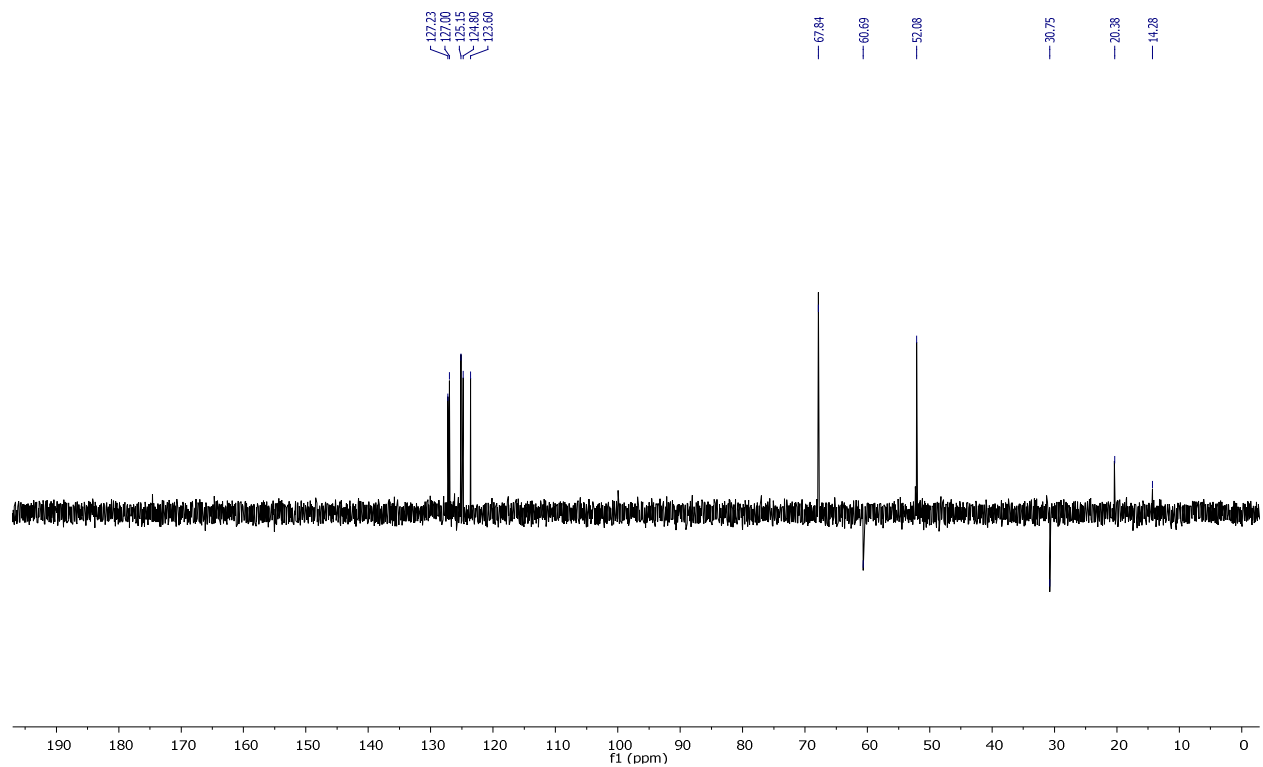

# $^1\text{H}$ NMR of compound (8a) (400 MHz, $\text{CDCl}_3$ )

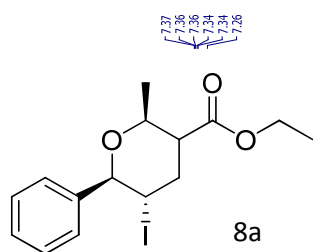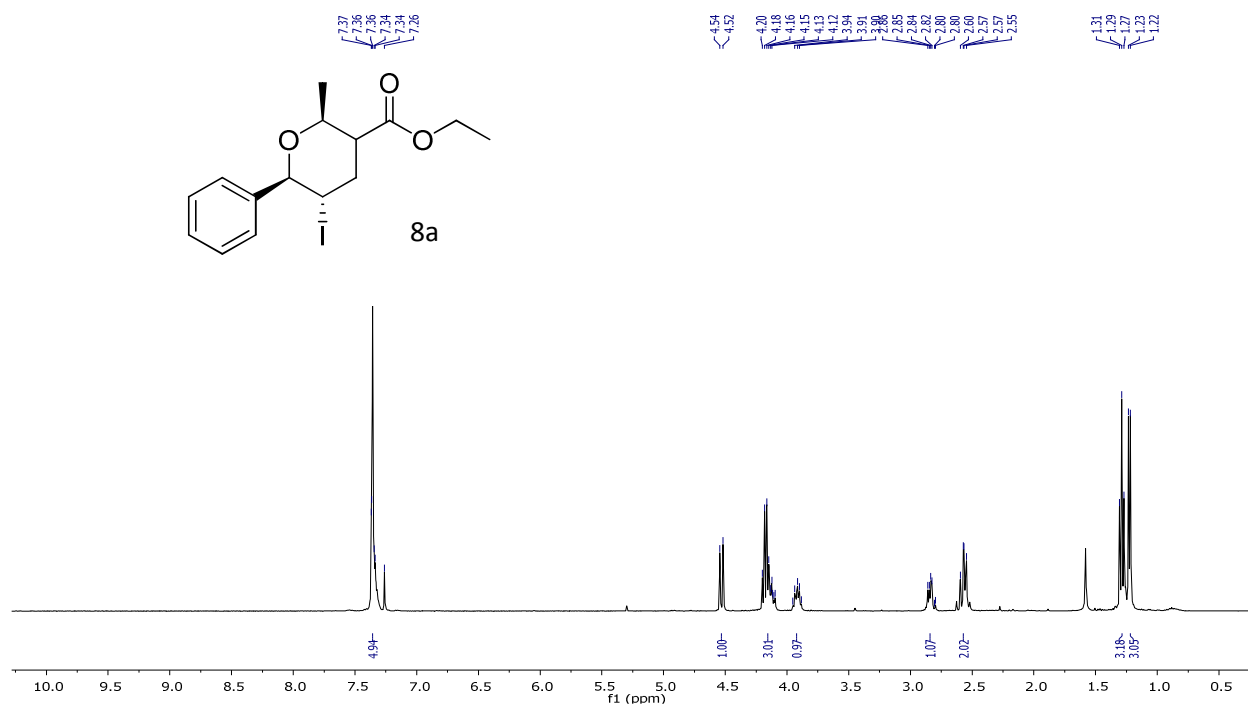

# $^{13}\text{C}$ NMR of compound (8a) (100 MHz, $\text{CDCl}_3$ )

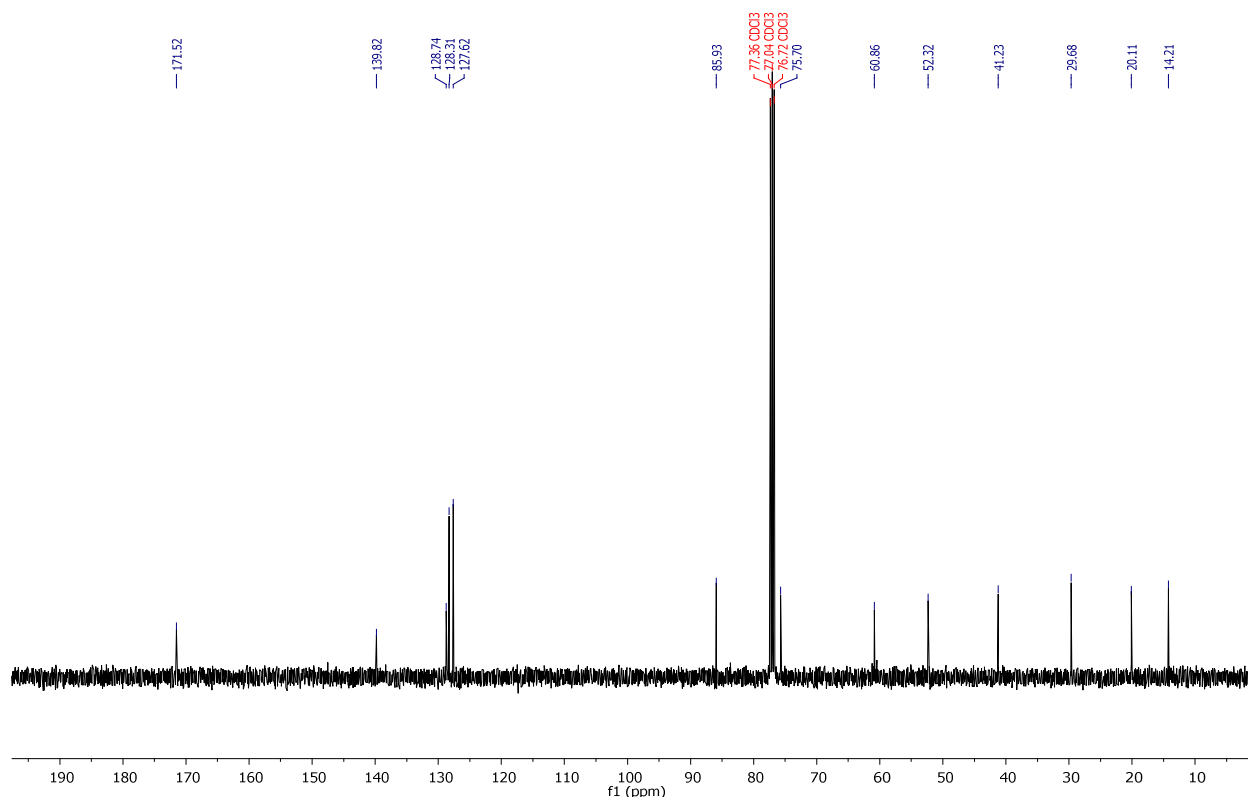



### DEPT-135 of compound (8a) (100 MHz, CDCl<sub>3</sub>)

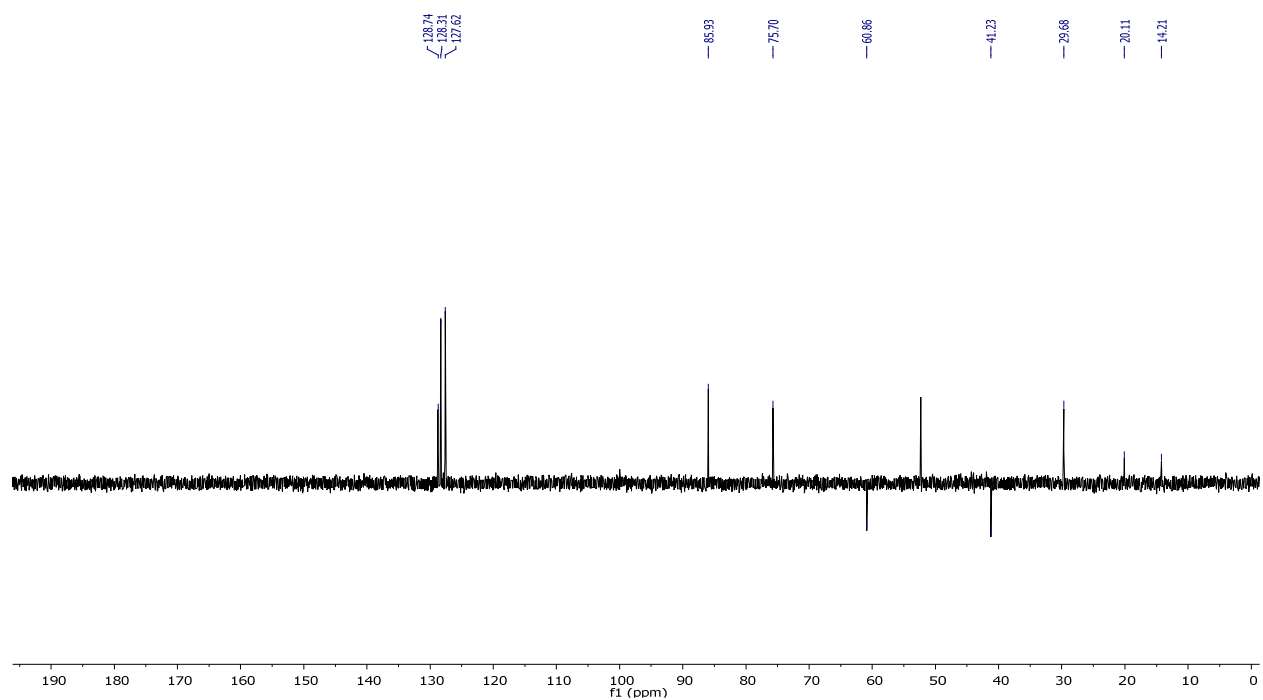

### <sup>1</sup>H NMR of compound (8b) (400 MHz, CDCl<sub>3</sub>)

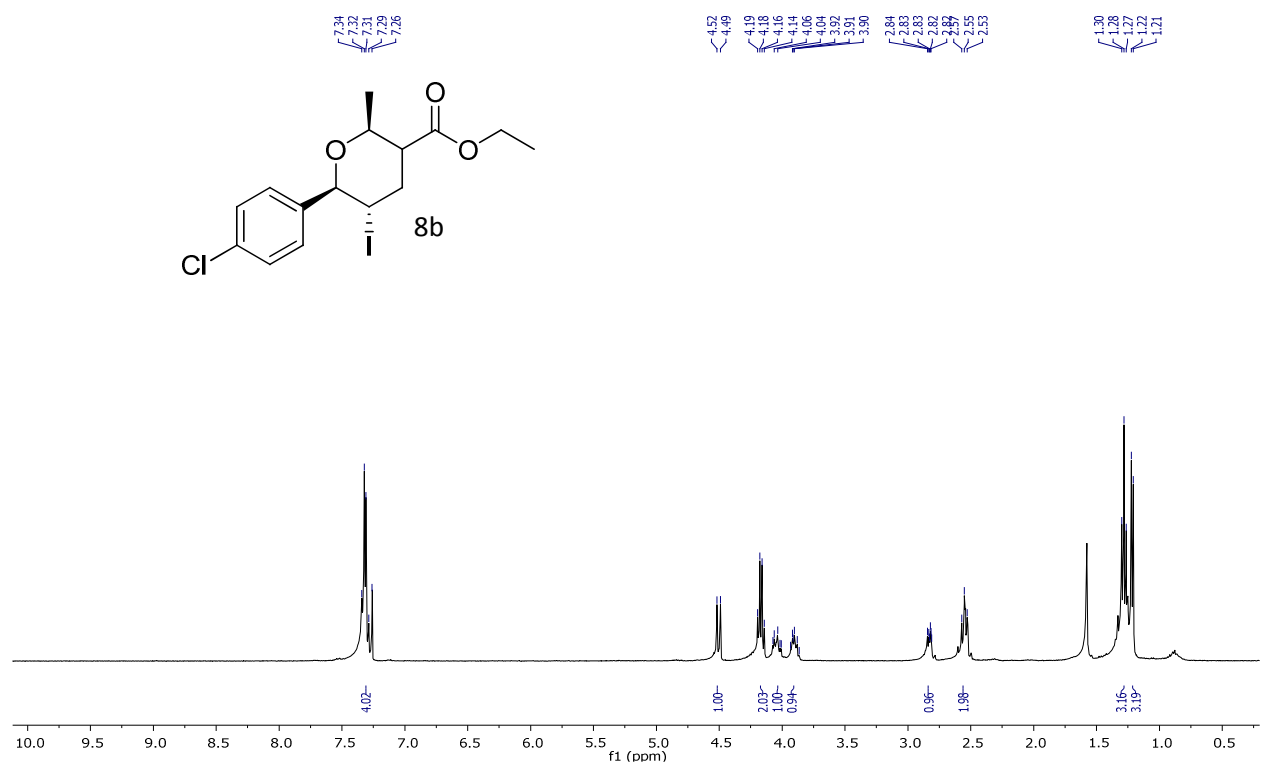

### $^{13}\text{C}$ NMR of compound (8b) (150 MHz, $\text{CDCl}_3$ )

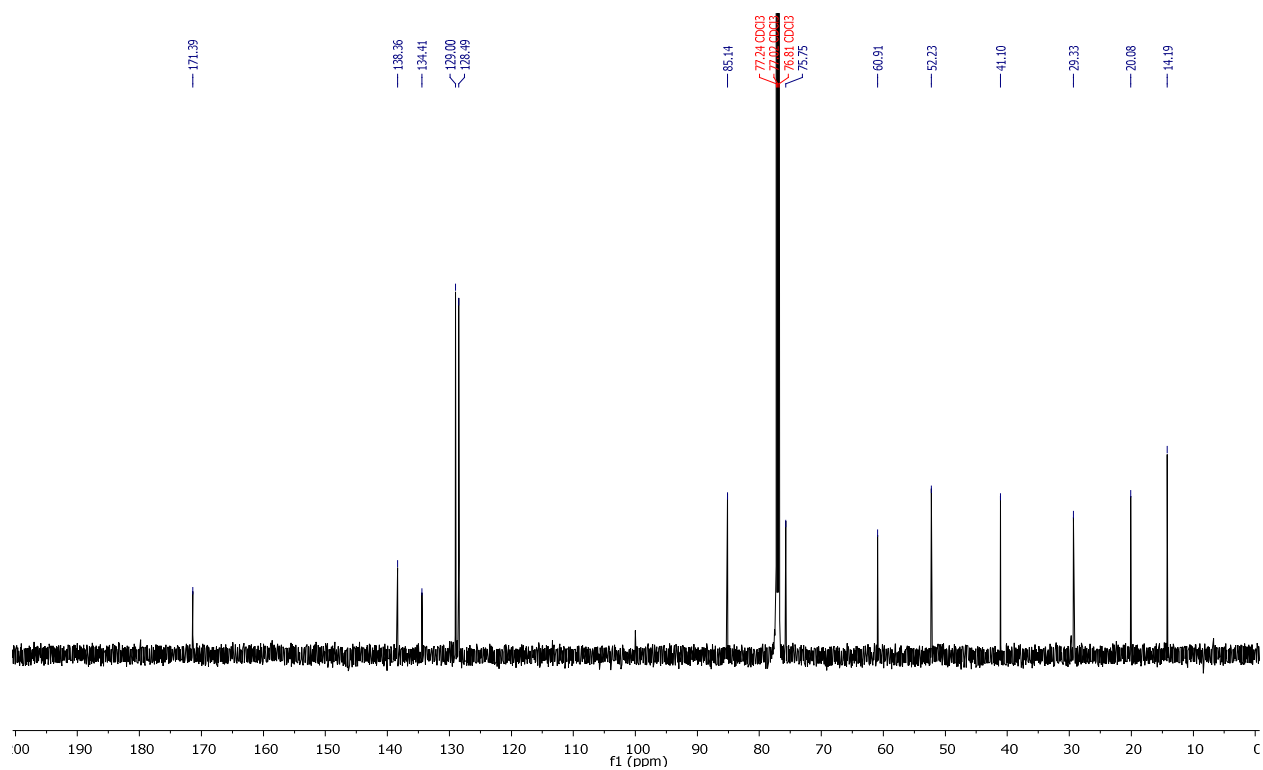

### DEPT-135 of compound (8b) (150 MHz, $\text{CDCl}_3$ )

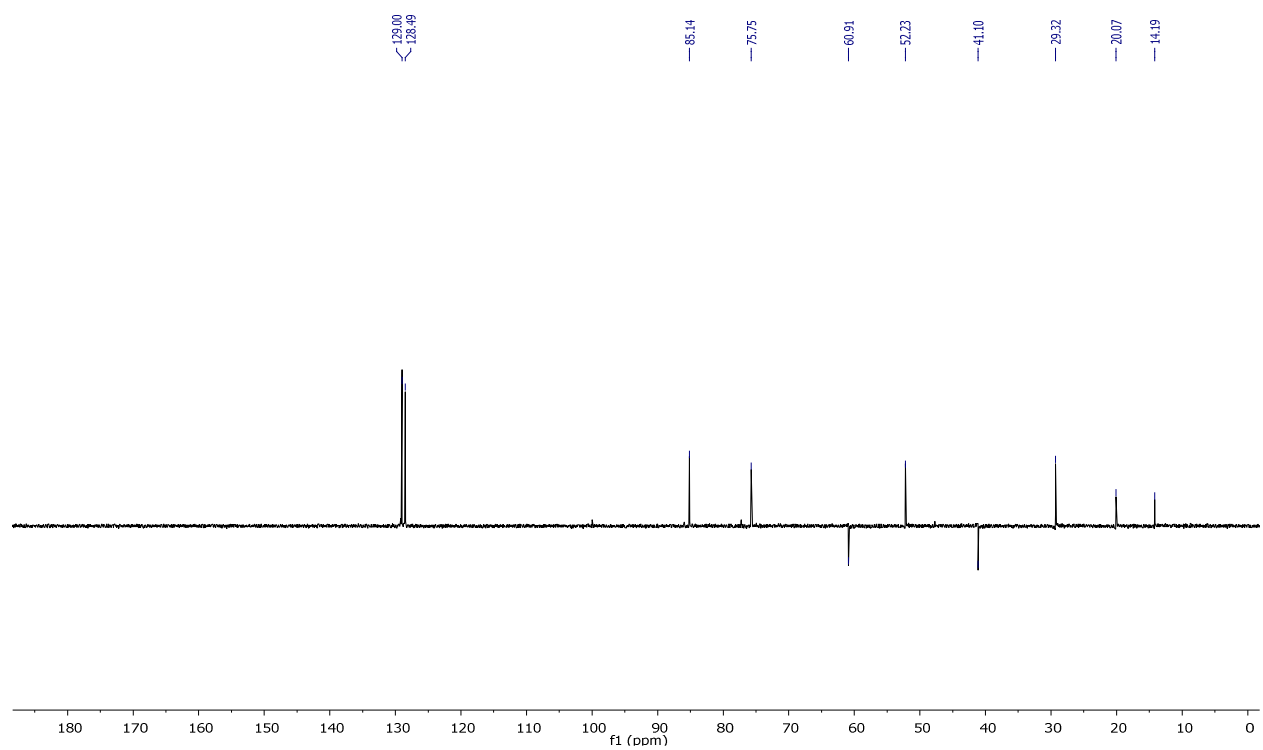

# $^1\text{H}$ NMR of compound (8c) (600 MHz, $\text{CDCl}_3$ )

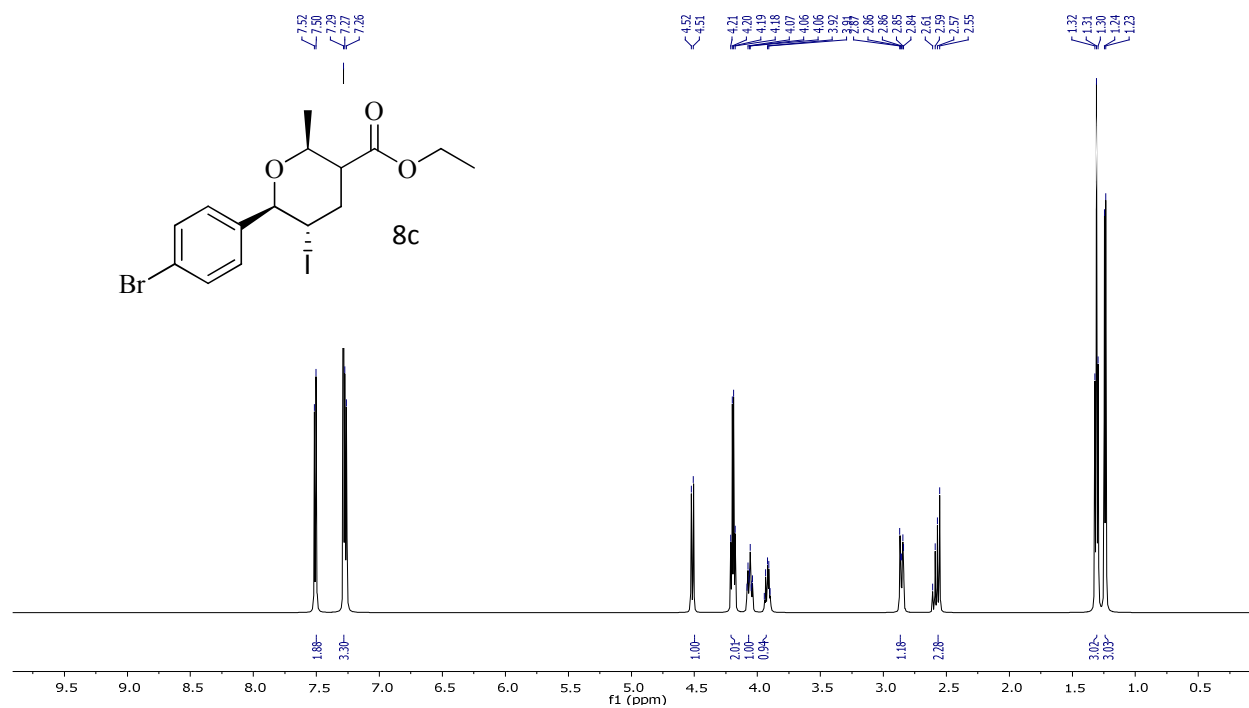

# $^{13}\text{C}$ NMR of compound (8c) (150 MHz, $\text{CDCl}_3$ )

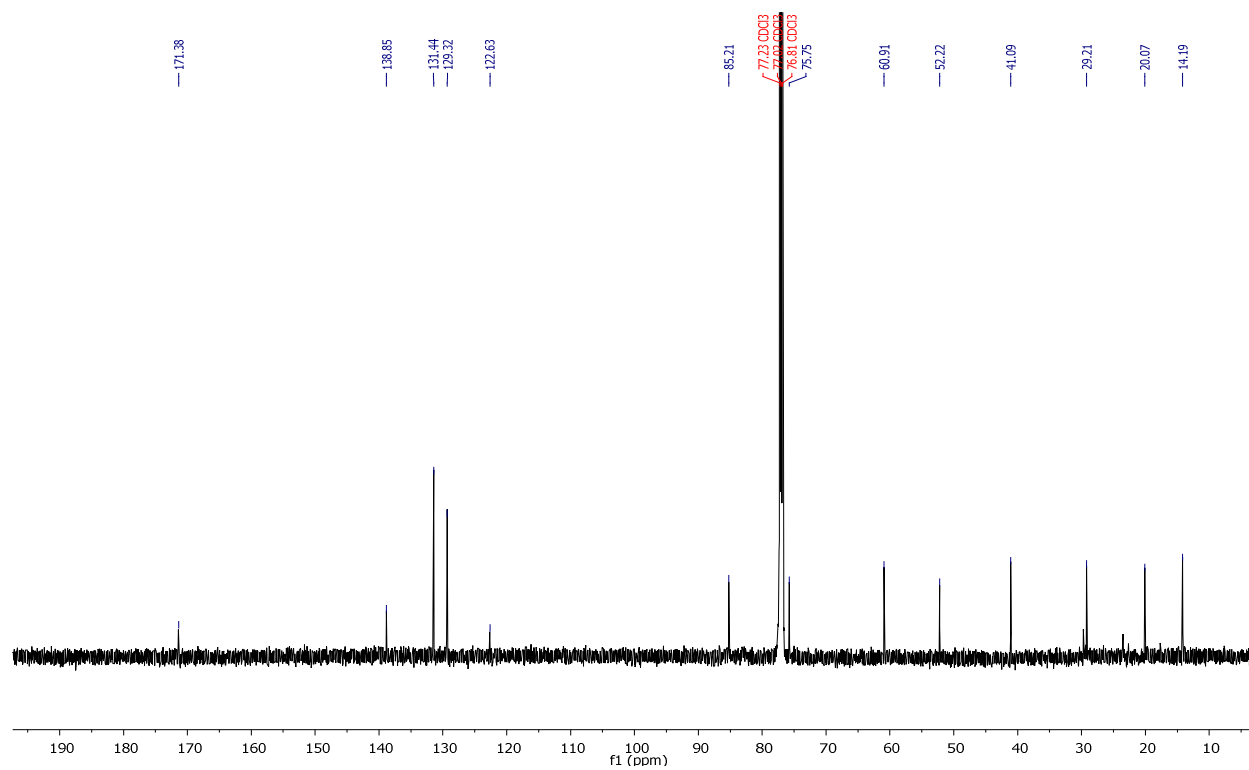

DEPT-135 of compound (8c) (150 MHz, CDCl<sub>3</sub>)

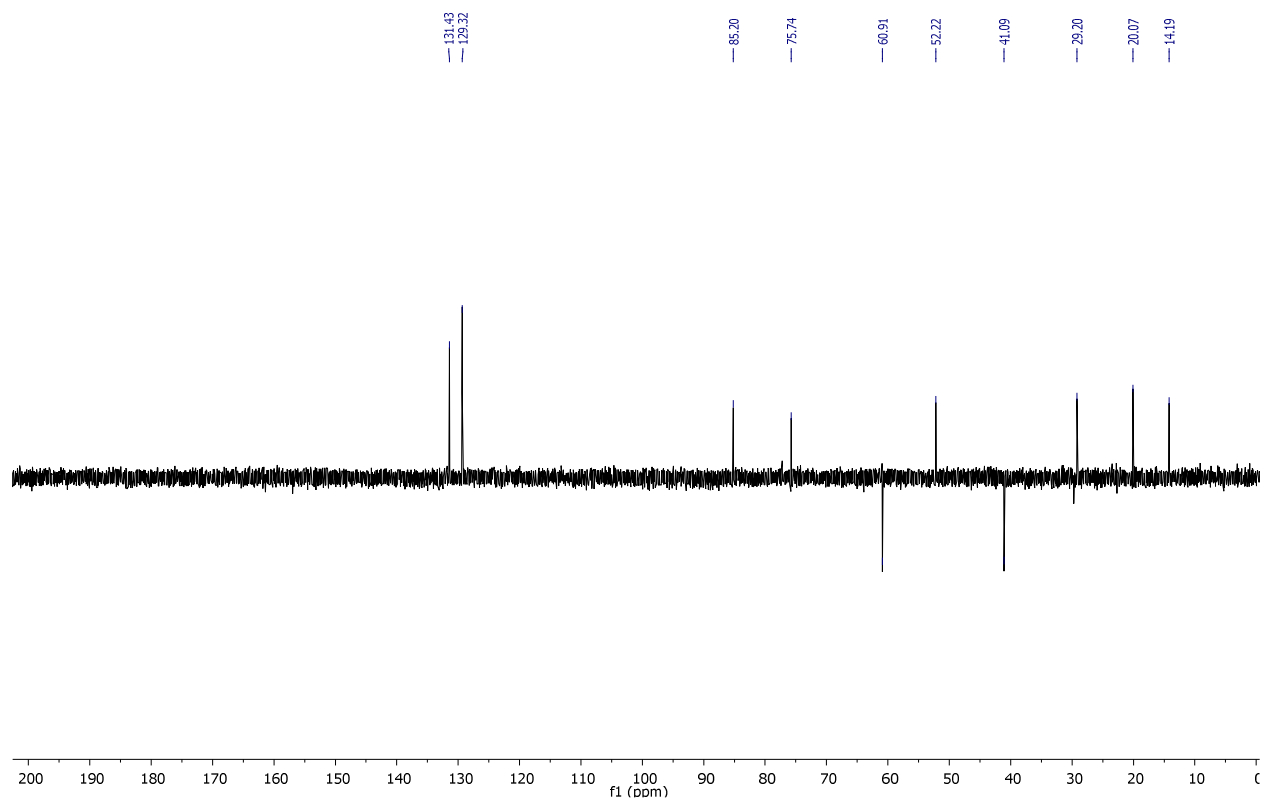

<sup>1</sup>H NMR of compound (8d) (600 MHz, CDCl<sub>3</sub>)

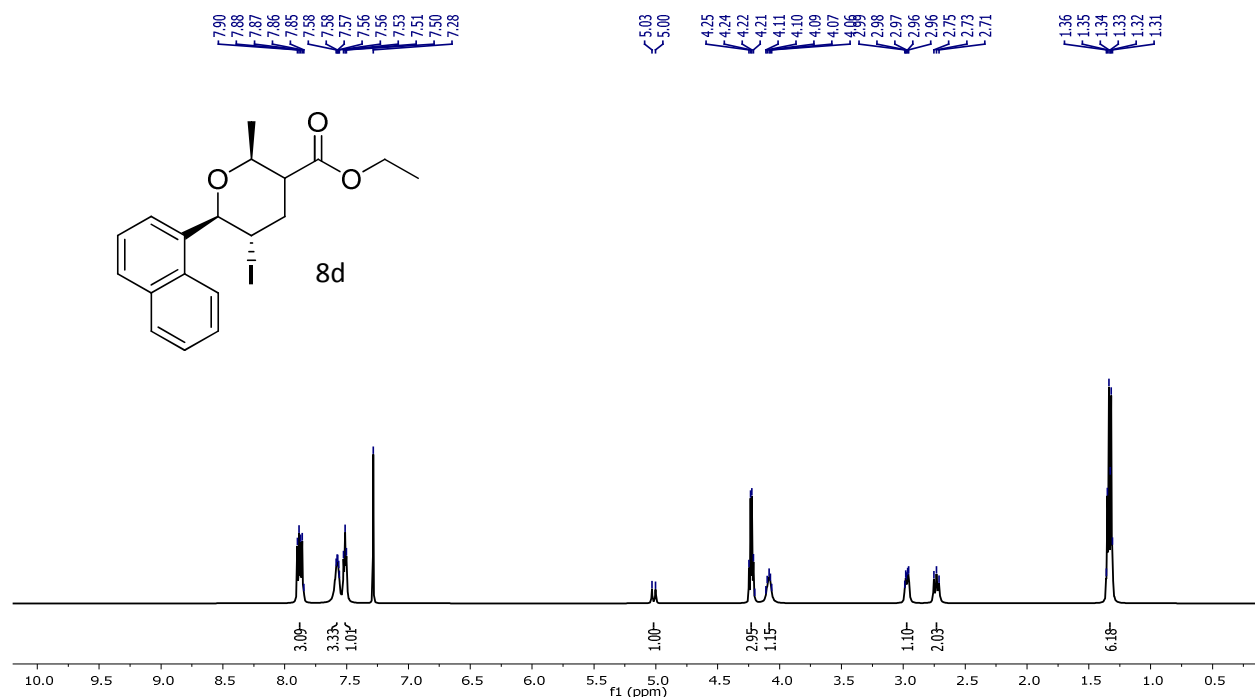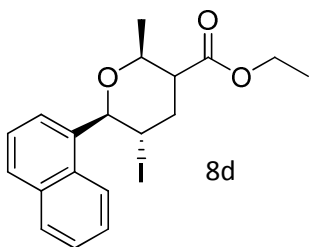

**$^{13}\text{C}$  NMR of compound (8d) (150 MHz,  $\text{CDCl}_3$ )**

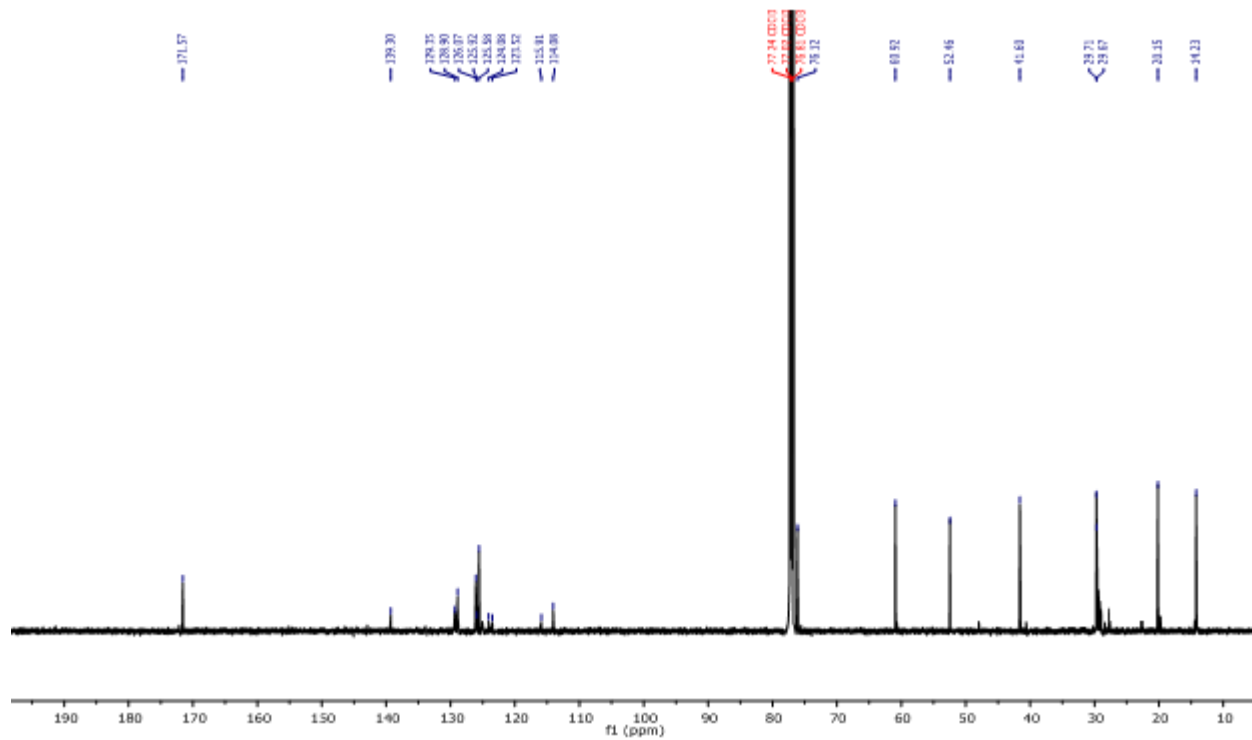

**DEPT-135 of compound (8d) (150 MHz,  $\text{CDCl}_3$ )**

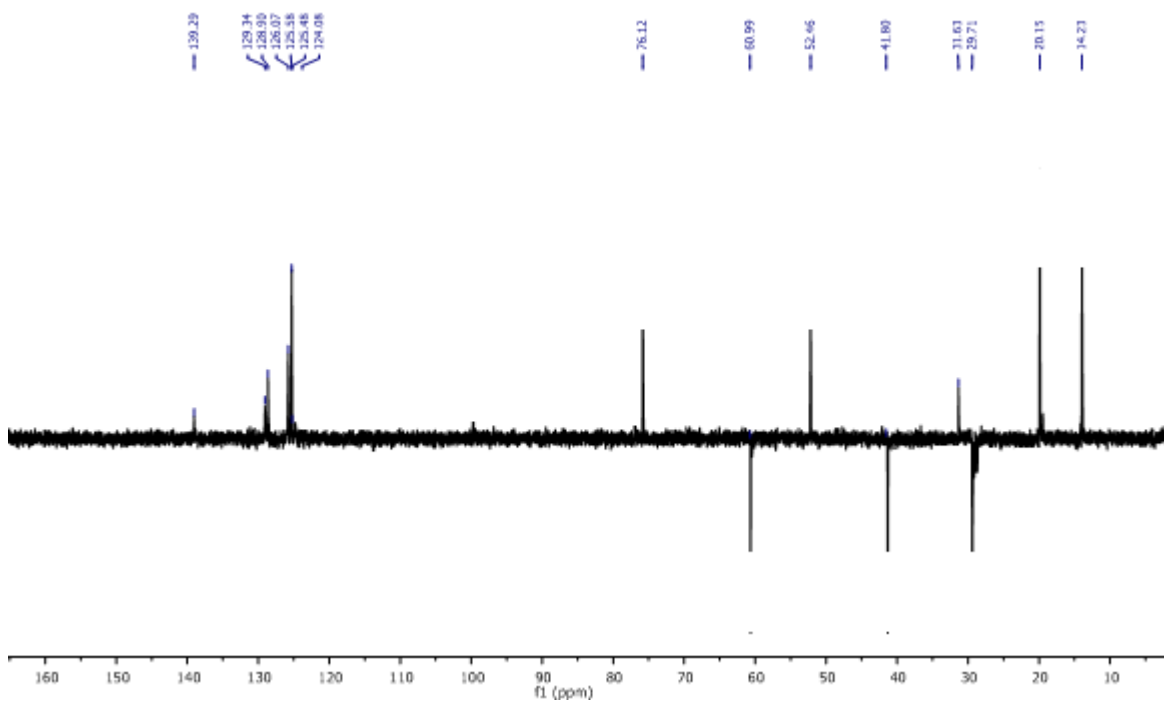

# <sup>1</sup>H NMR of compound (8e) (400 MHz, CDCl<sub>3</sub>)

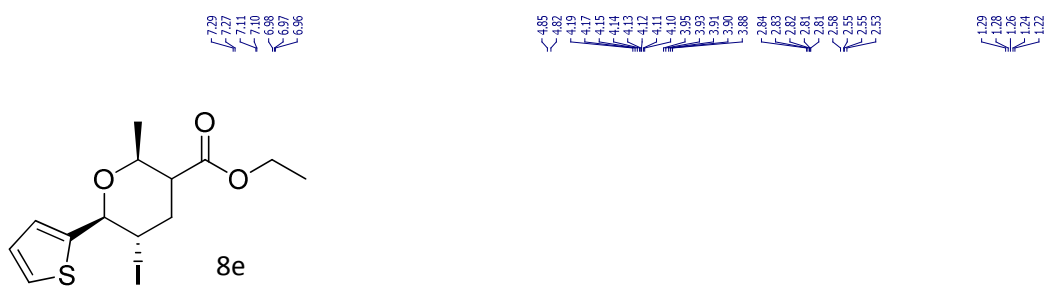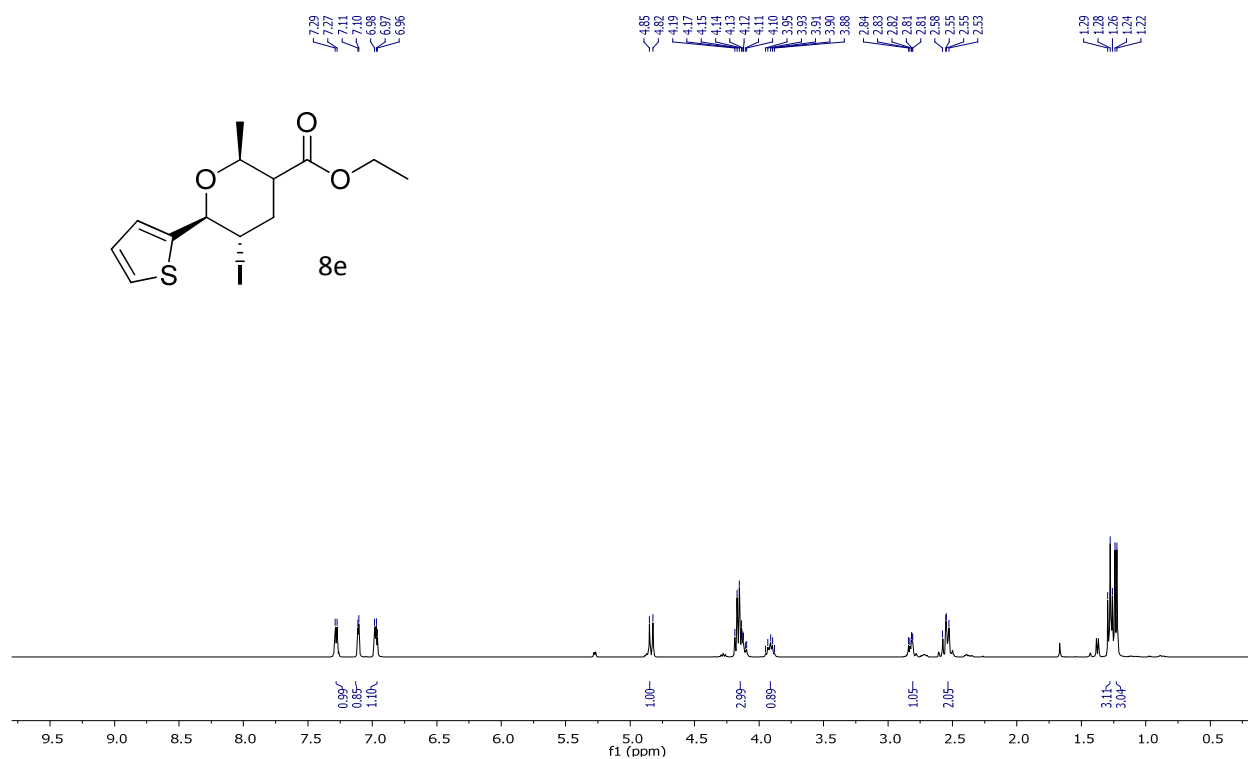

# <sup>13</sup>C NMR of compound (8e) (150 MHz, CDCl<sub>3</sub>)

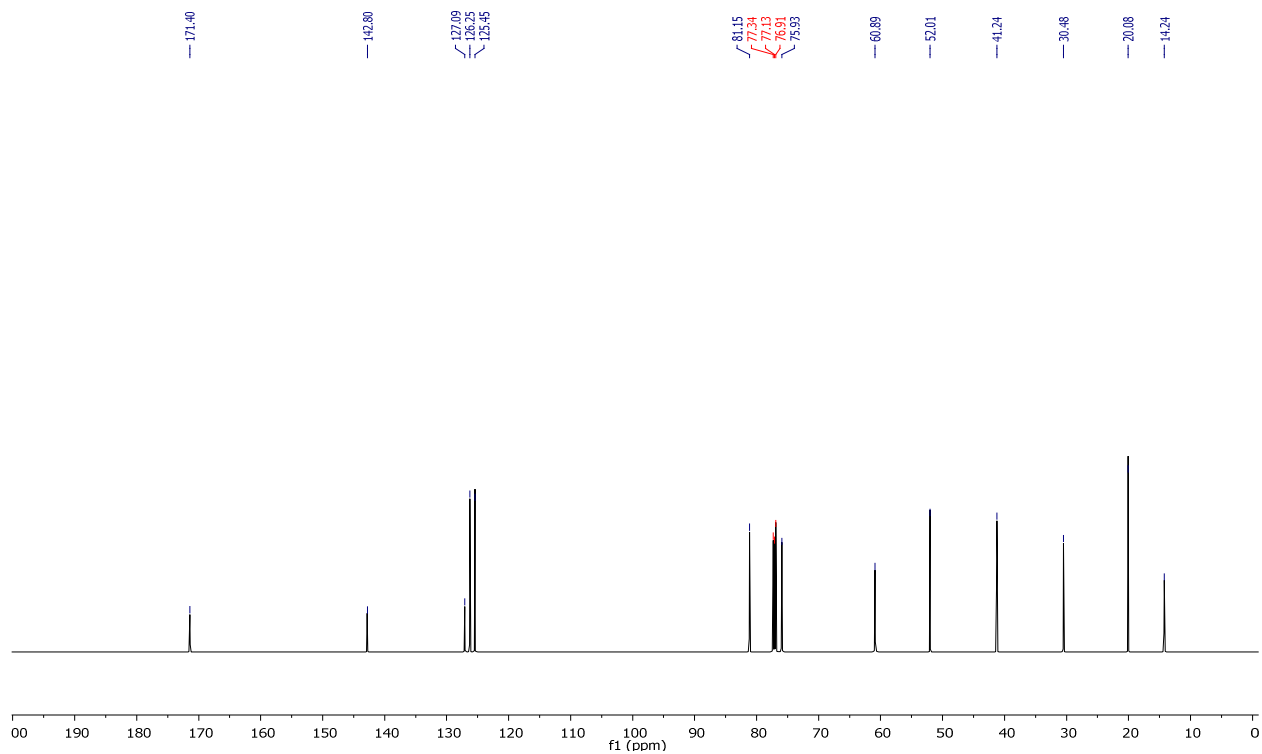

DEPT-135 of compound (8e) (150 MHz, CDCl<sub>3</sub>)

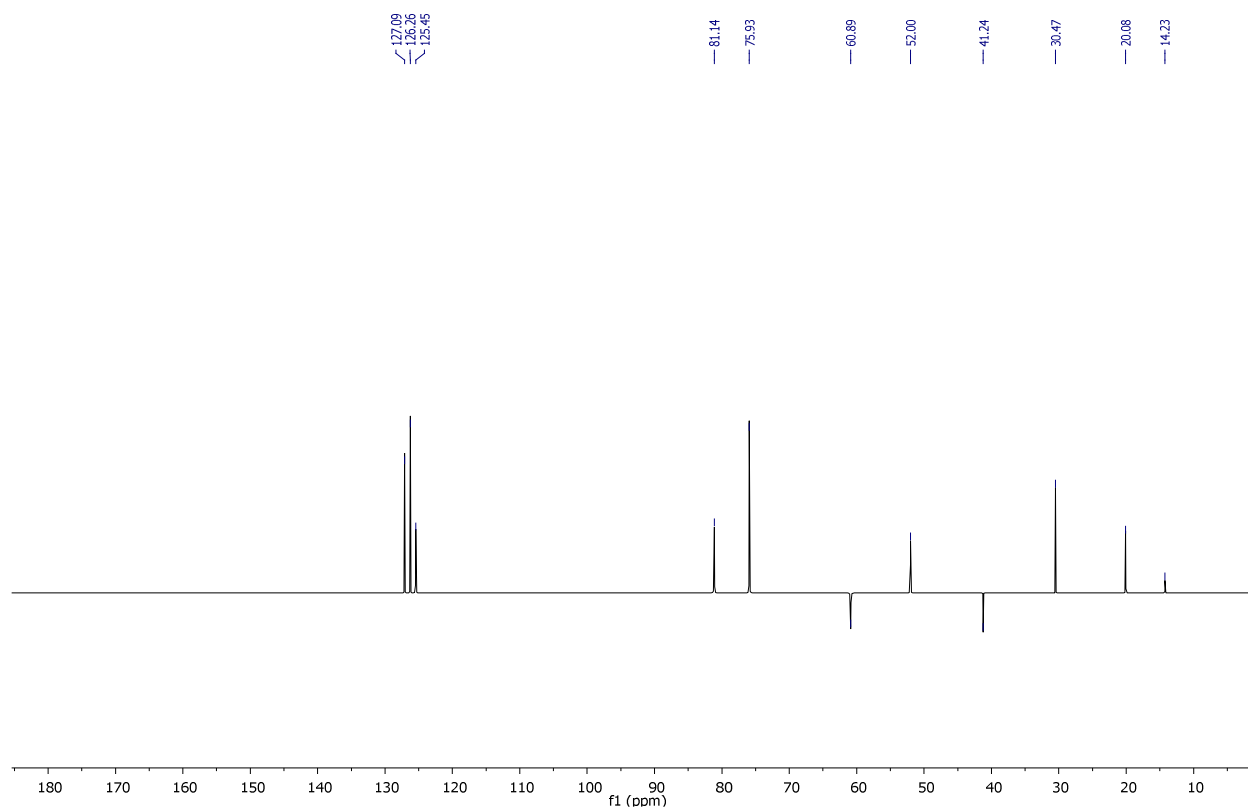

<sup>1</sup>H NMR of compound (9a) (600 MHz, CDCl<sub>3</sub>)

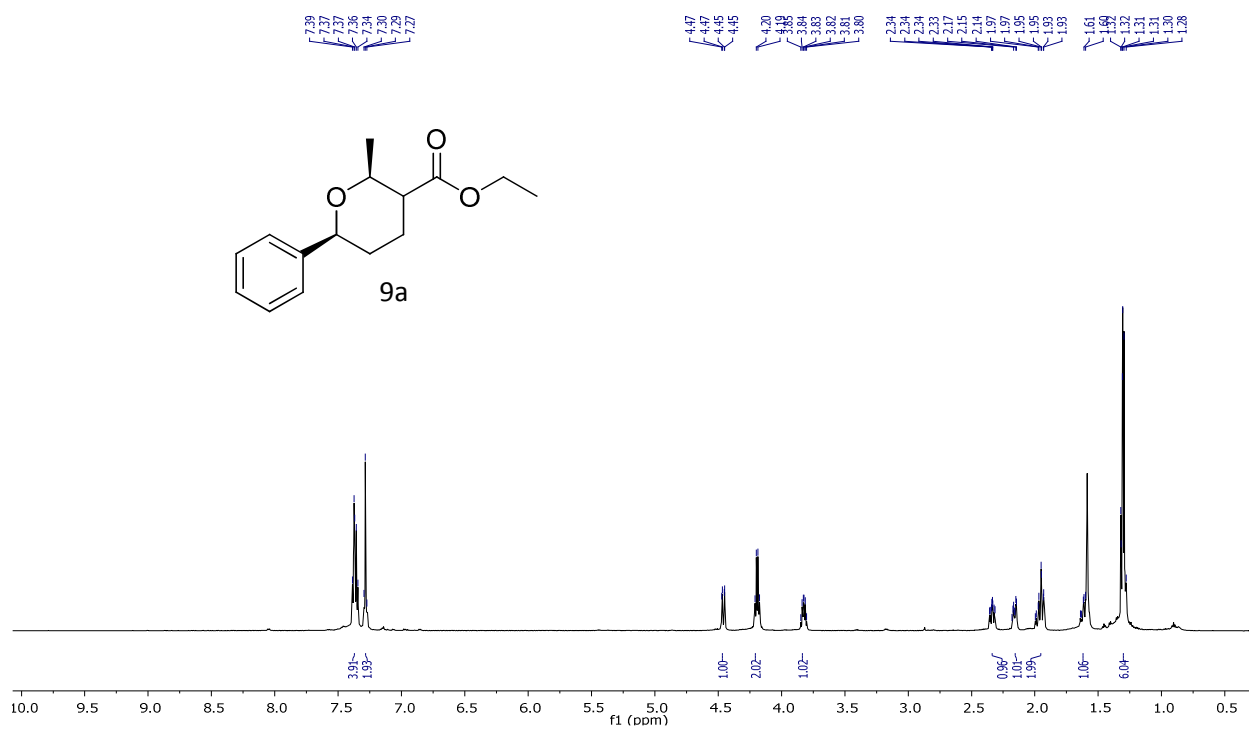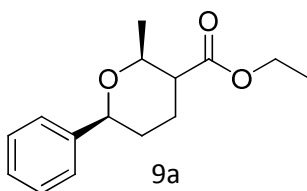

### $^{13}\text{C}$ NMR of compound (9a) (150 MHz, $\text{CDCl}_3$ )

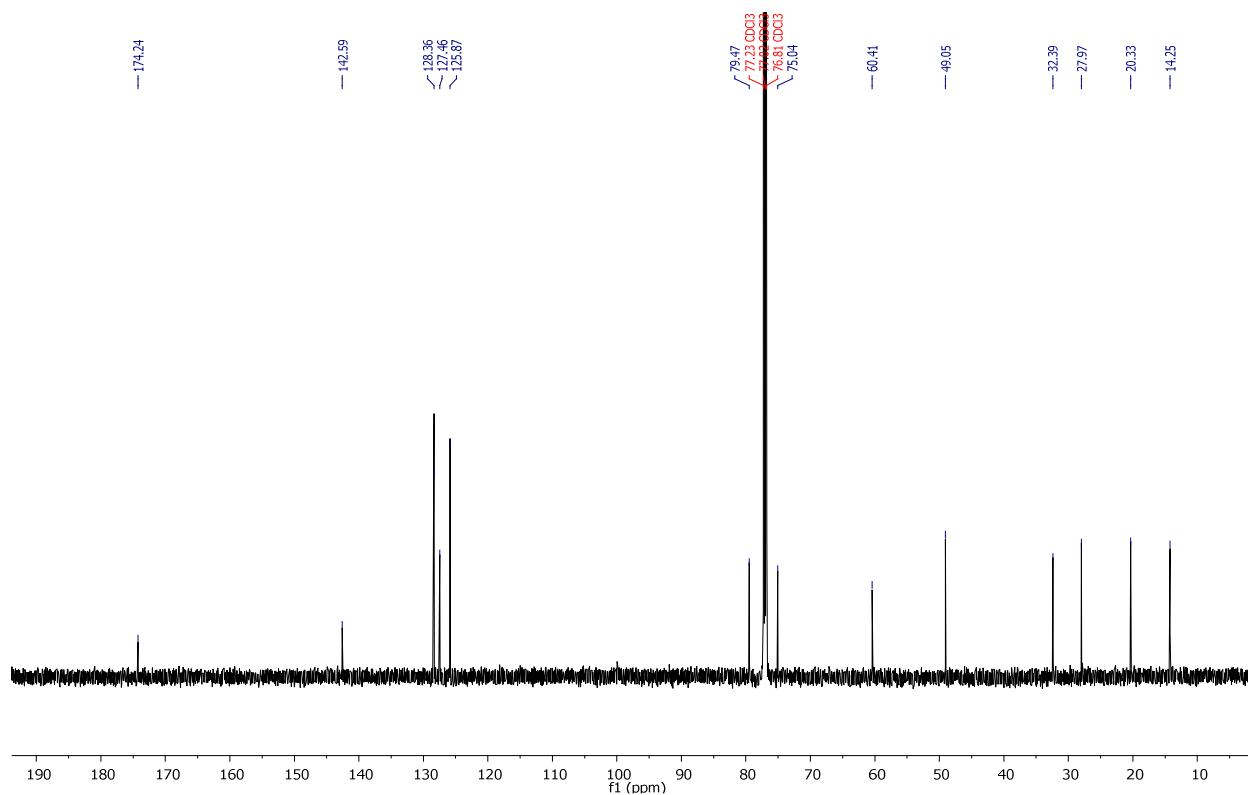

### DEPT-135 of compound (9a) (150 MHz, $\text{CDCl}_3$ )

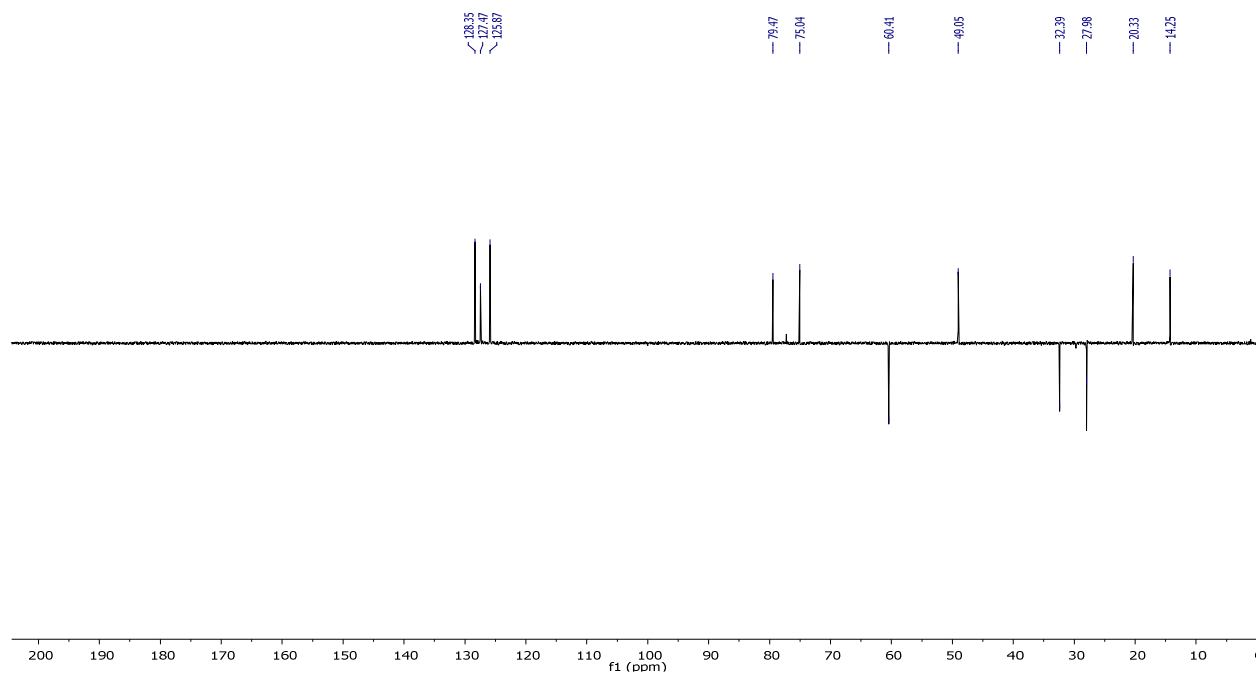



### $^1\text{H}$ NMR of compound (9b) (400 MHz, $\text{CDCl}_3$ )

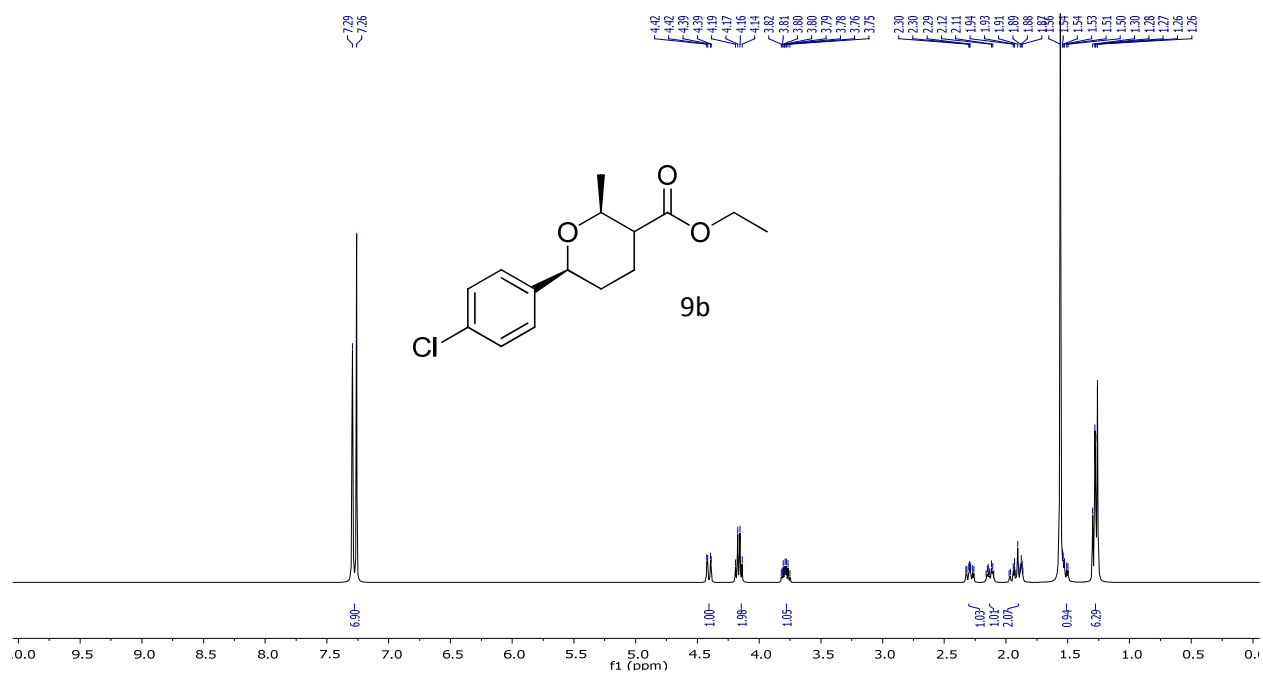

### $^{13}\text{C}$ NMR of compound (9b) (150 MHz, $\text{CDCl}_3$ )

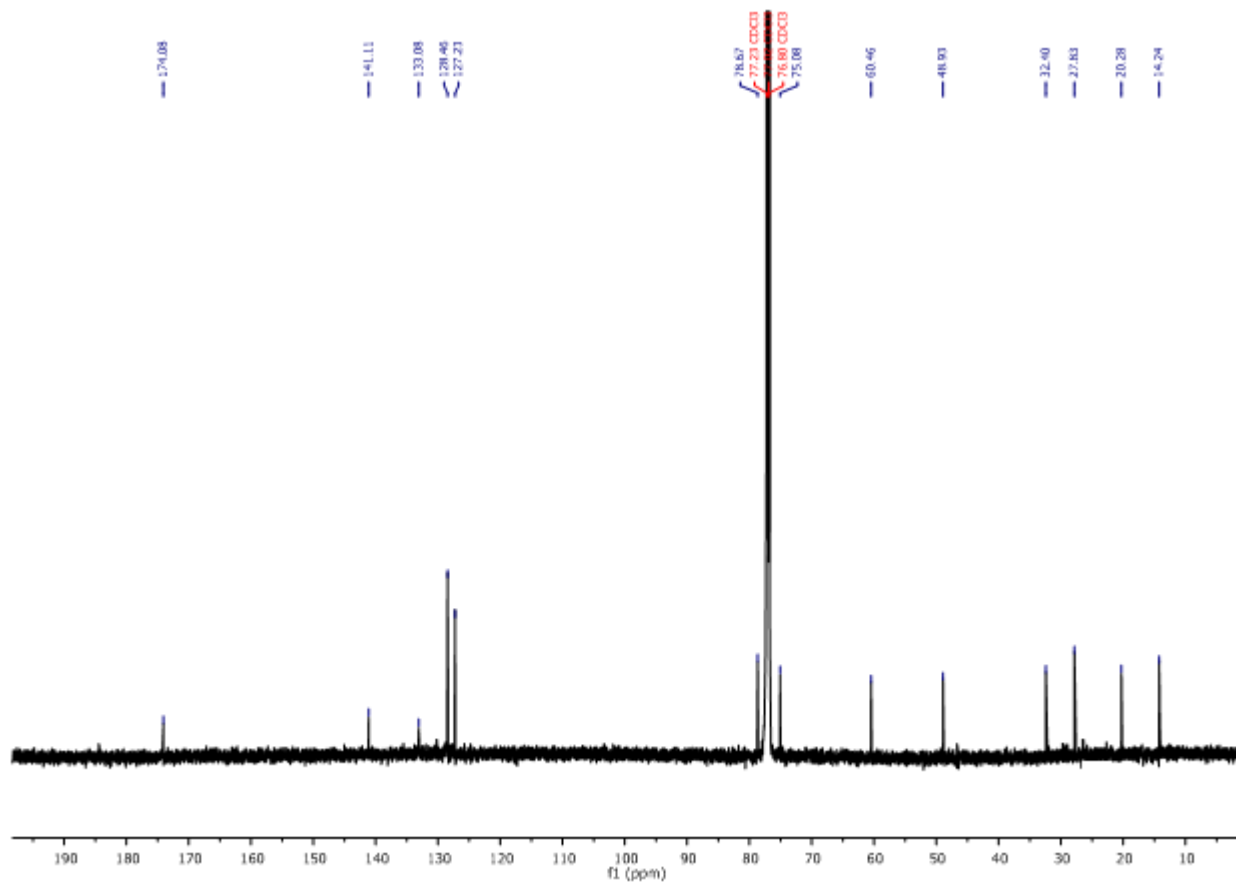

DEPT-135 of compound (9b) (150 MHz, CDCl<sub>3</sub>)

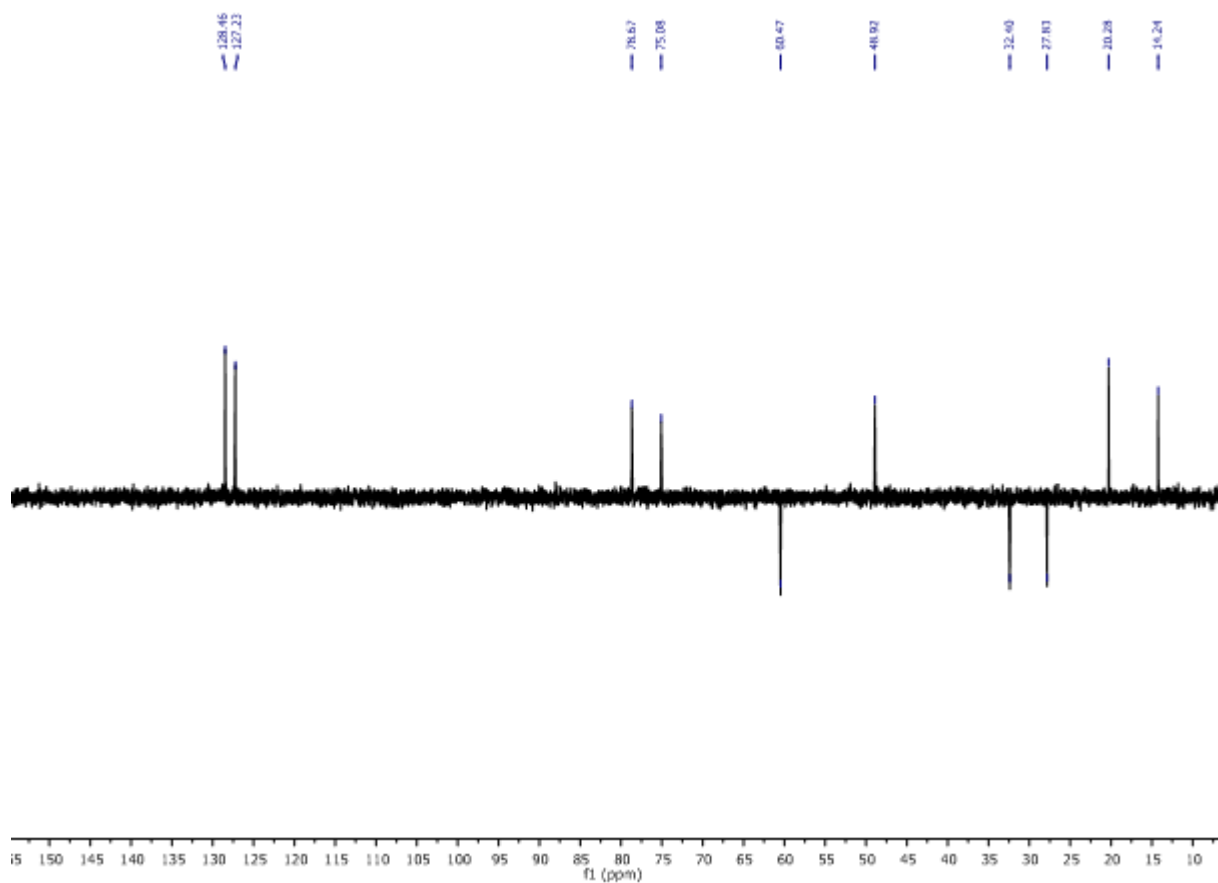

<sup>1</sup>H NMR of compound (9c) (600 MHz, CDCl<sub>3</sub>)

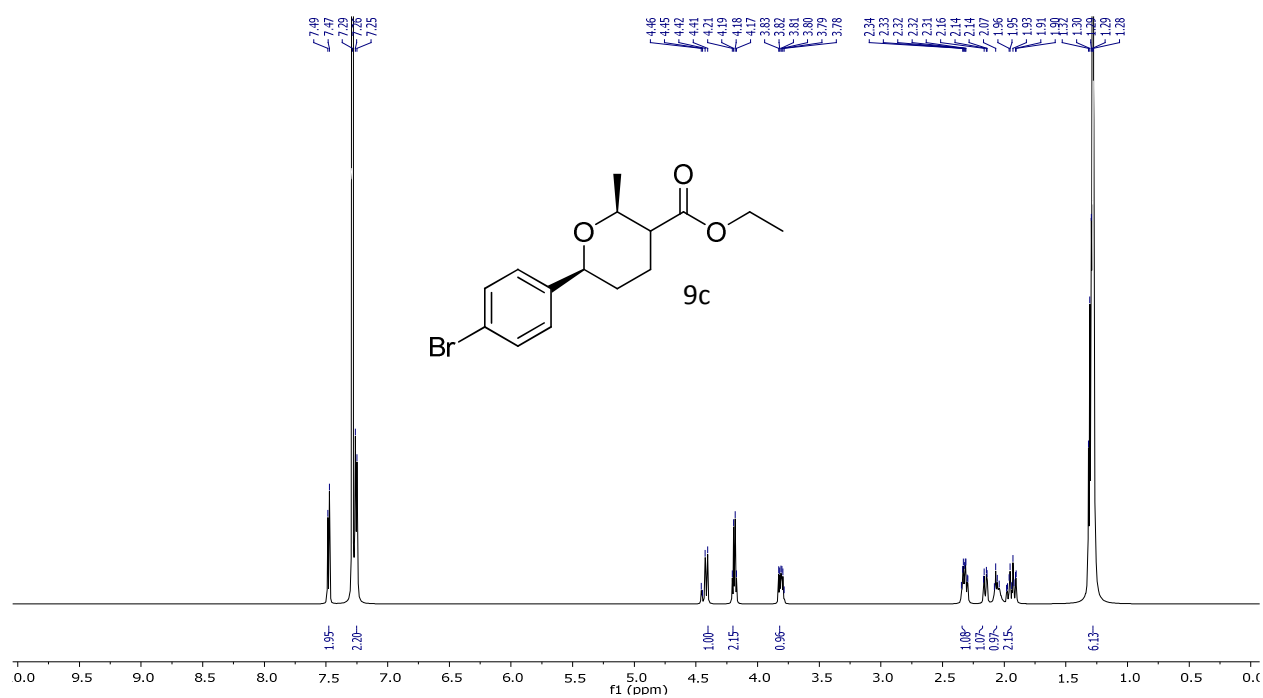

### $^{13}\text{C}$ NMR of compound (9c) (150 MHz, $\text{CDCl}_3$ )

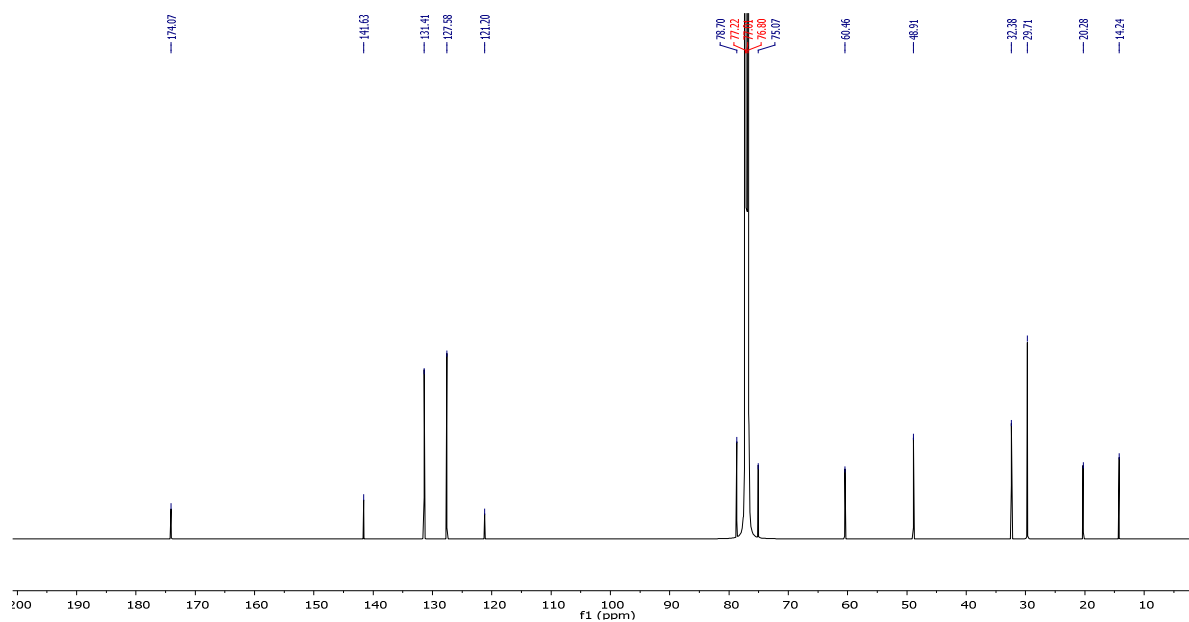

### DEPT-135 of compound (9c) (150 MHz, $\text{CDCl}_3$ )

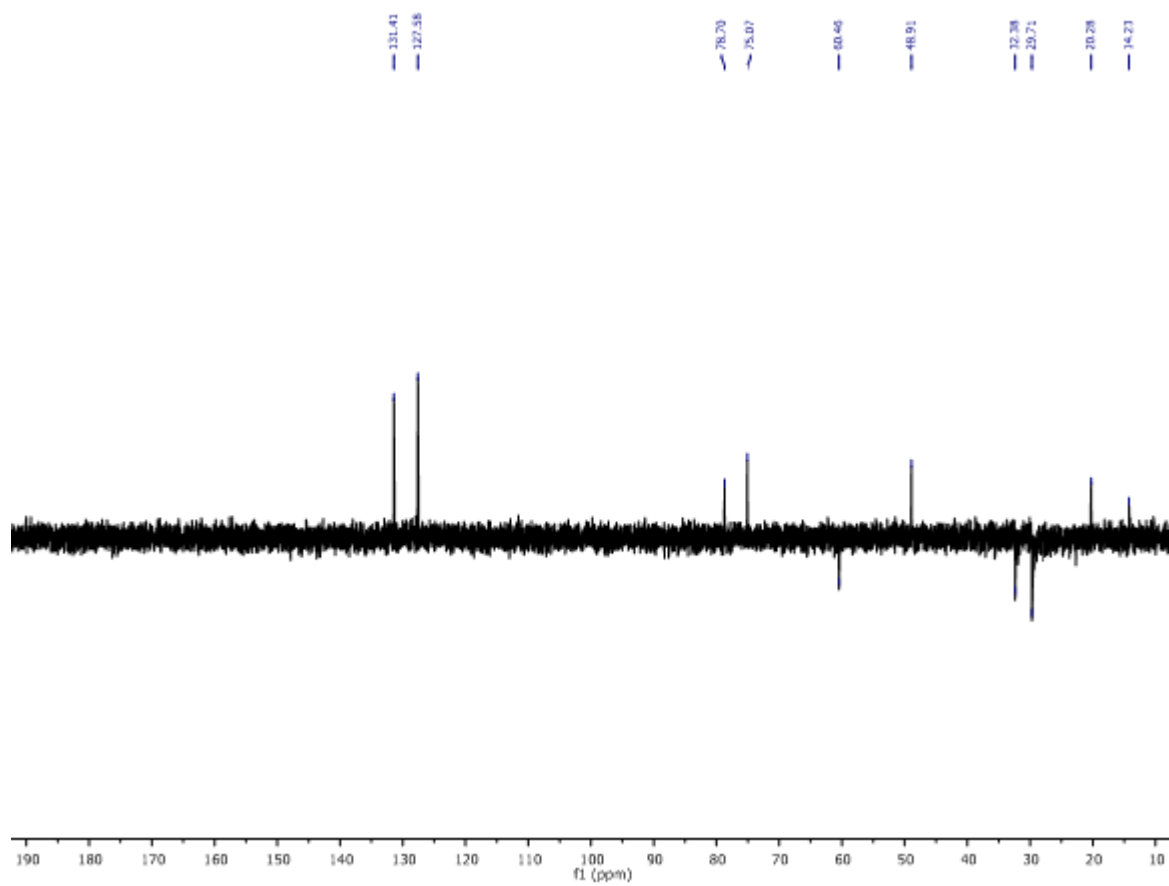

# <sup>1</sup>H NMR of compound (9d) (400 MHz, CDCl<sub>3</sub>)

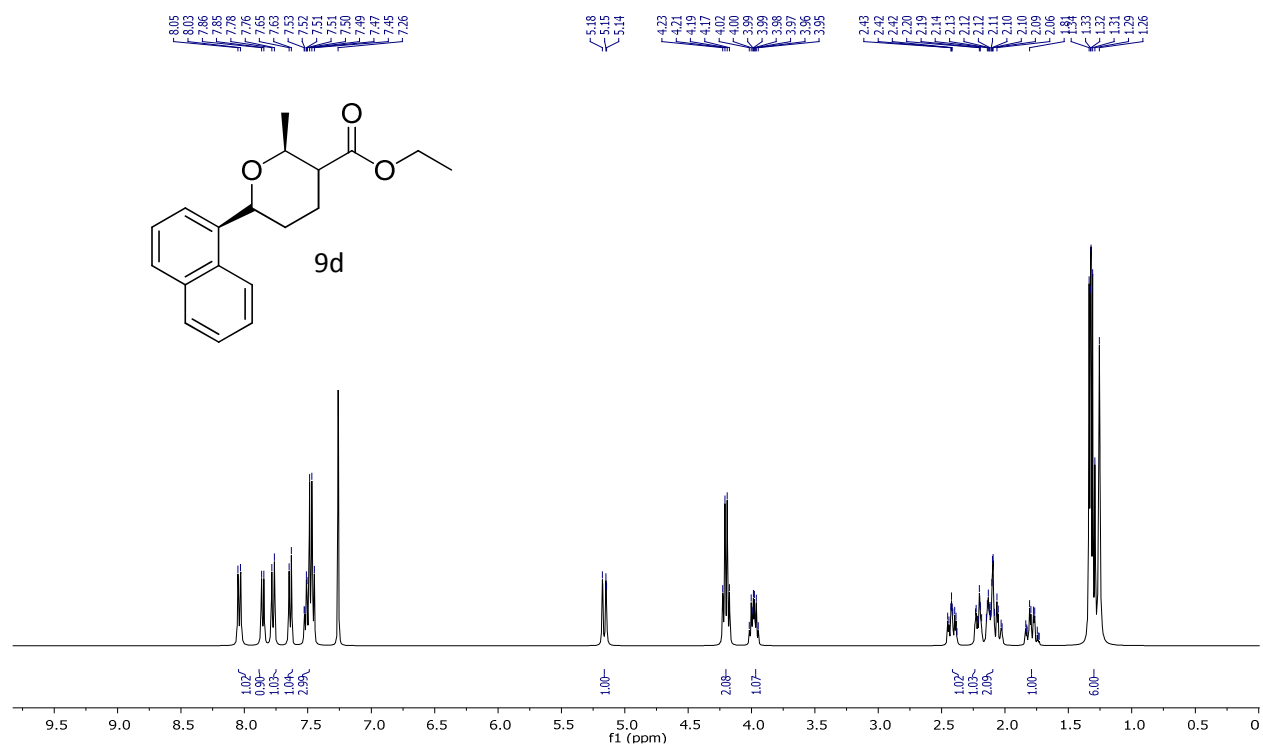

# <sup>13</sup>C NMR of compound (9d) (150 MHz, CDCl<sub>3</sub>)

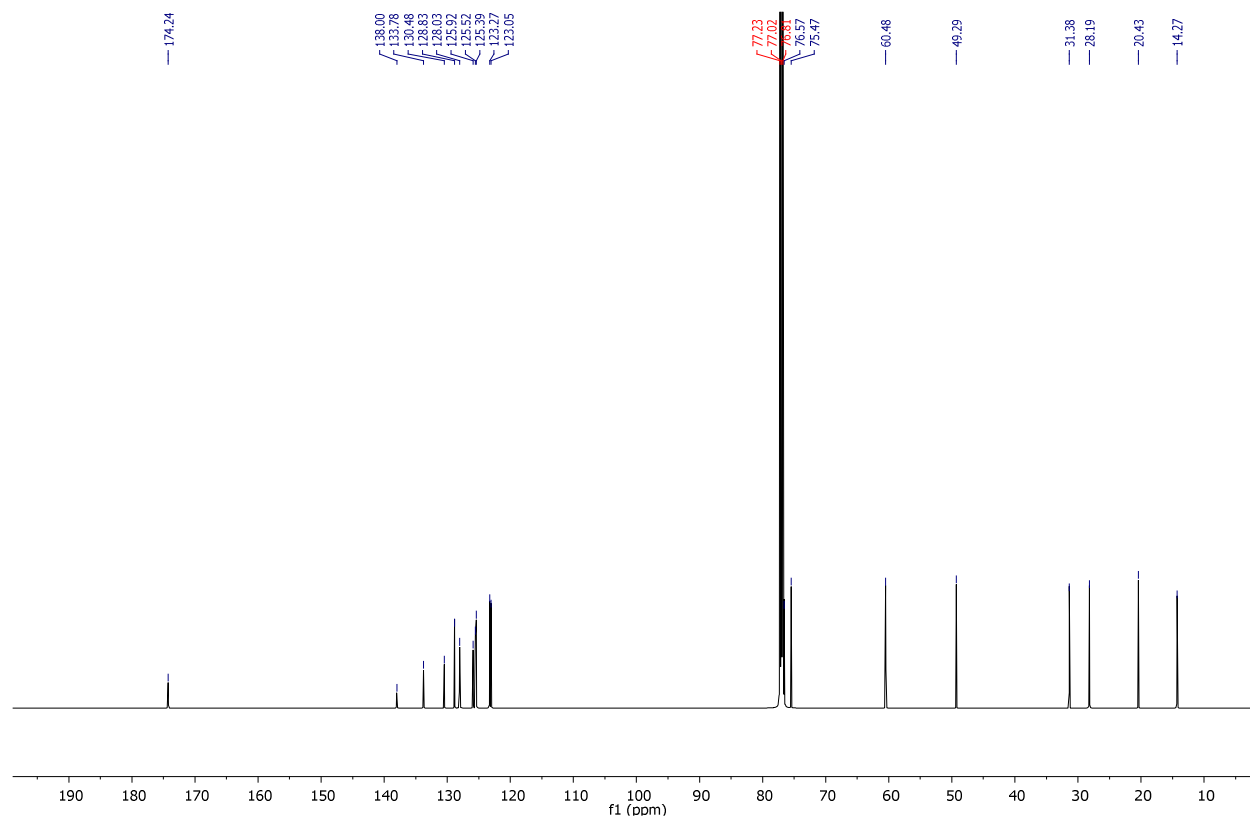

DEPT-135 of compound (9d) (150 MHz, CDCl<sub>3</sub>)

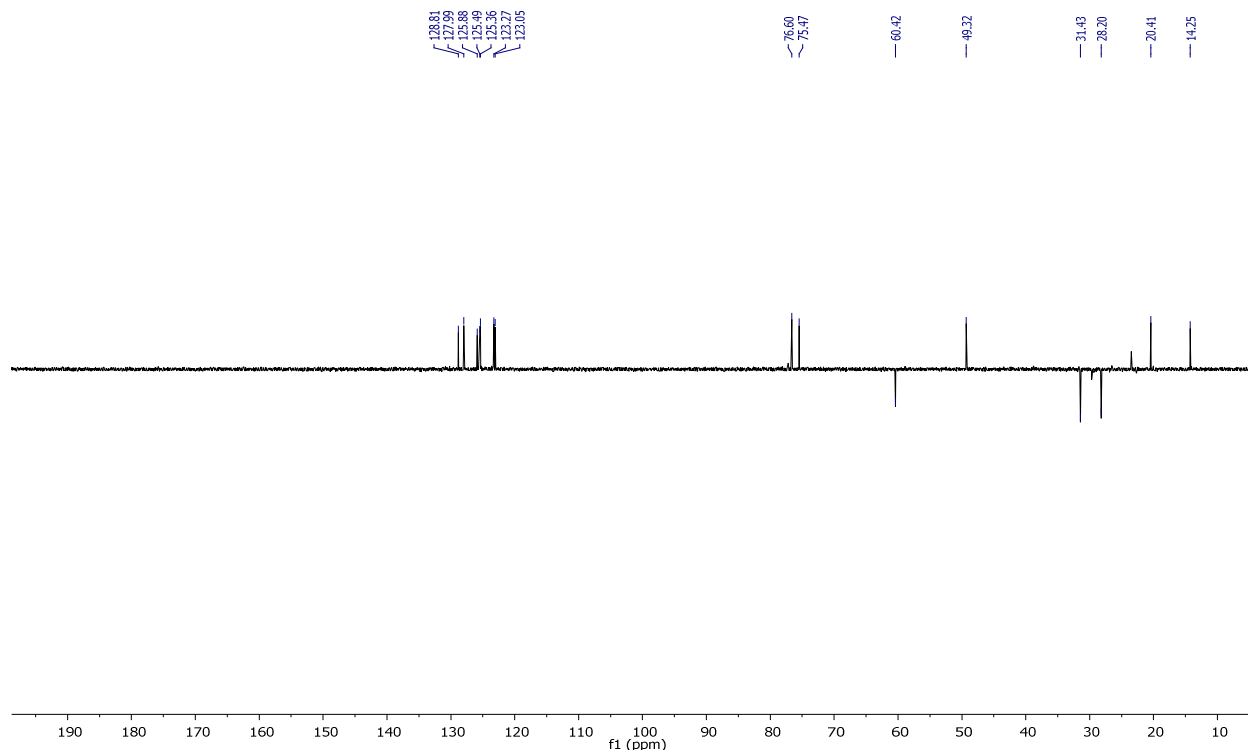

<sup>1</sup>H NMR of compound (9e) (400 MHz, CDCl<sub>3</sub>)

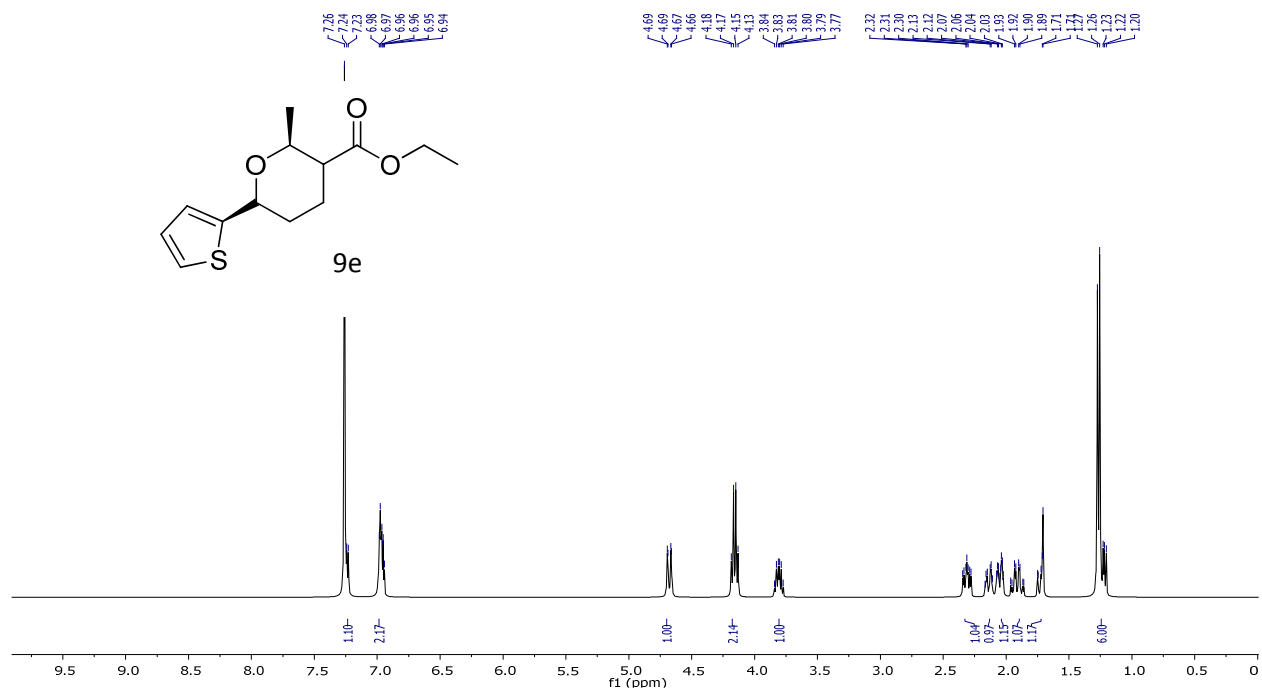

**$^{13}\text{C}$  NMR of compound (9e) (100 MHz,  $\text{CDCl}_3$ )**

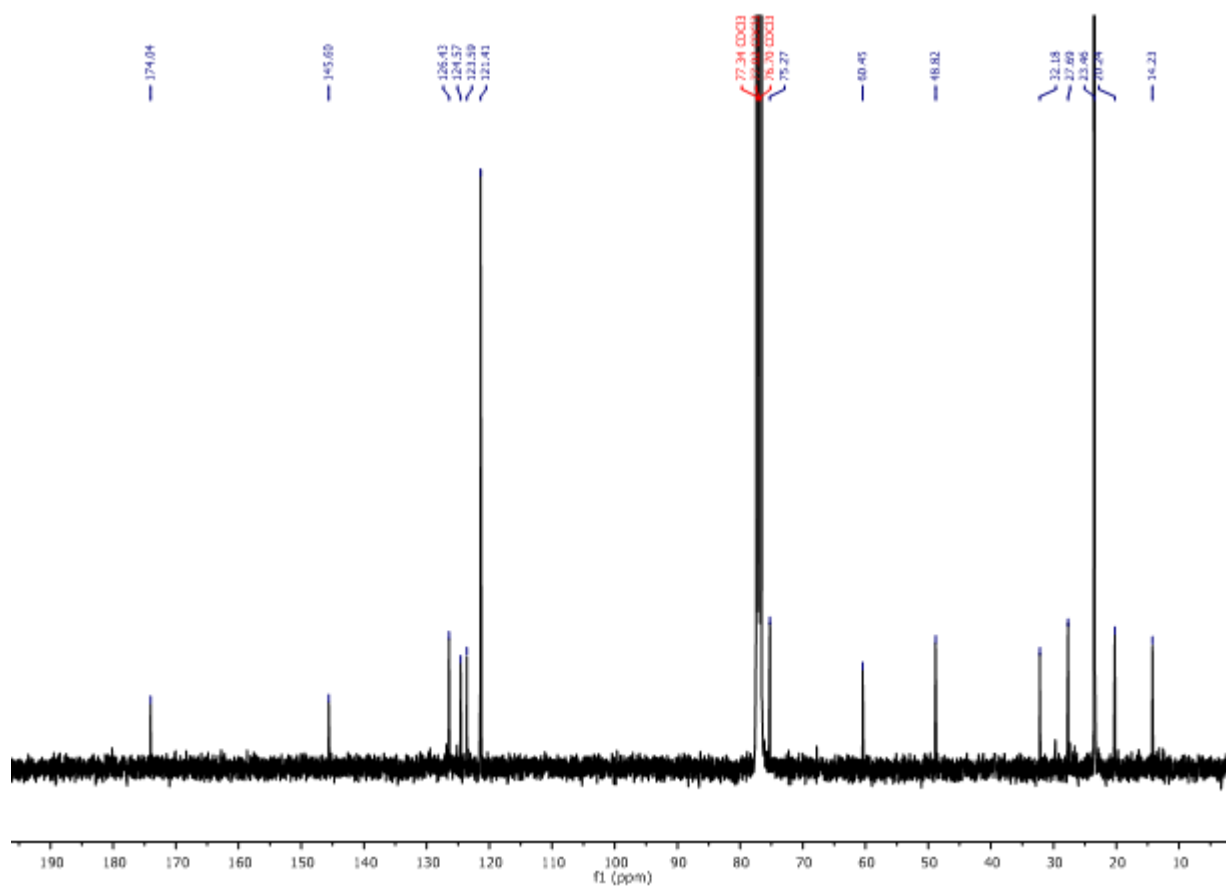

**DEPT-135 of compound (9e) (150 MHz,  $\text{CDCl}_3$ )**

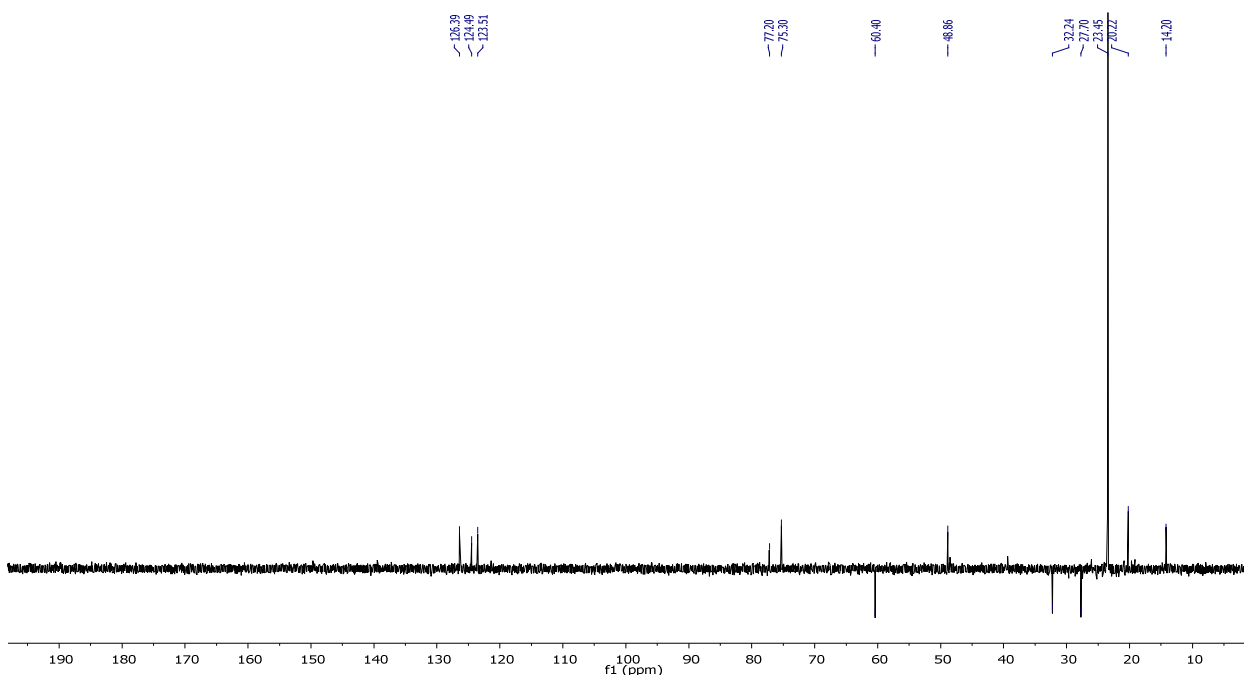

# <sup>1</sup>H NMR of compound (10a) (400 MHz, CDCl<sub>3</sub>)

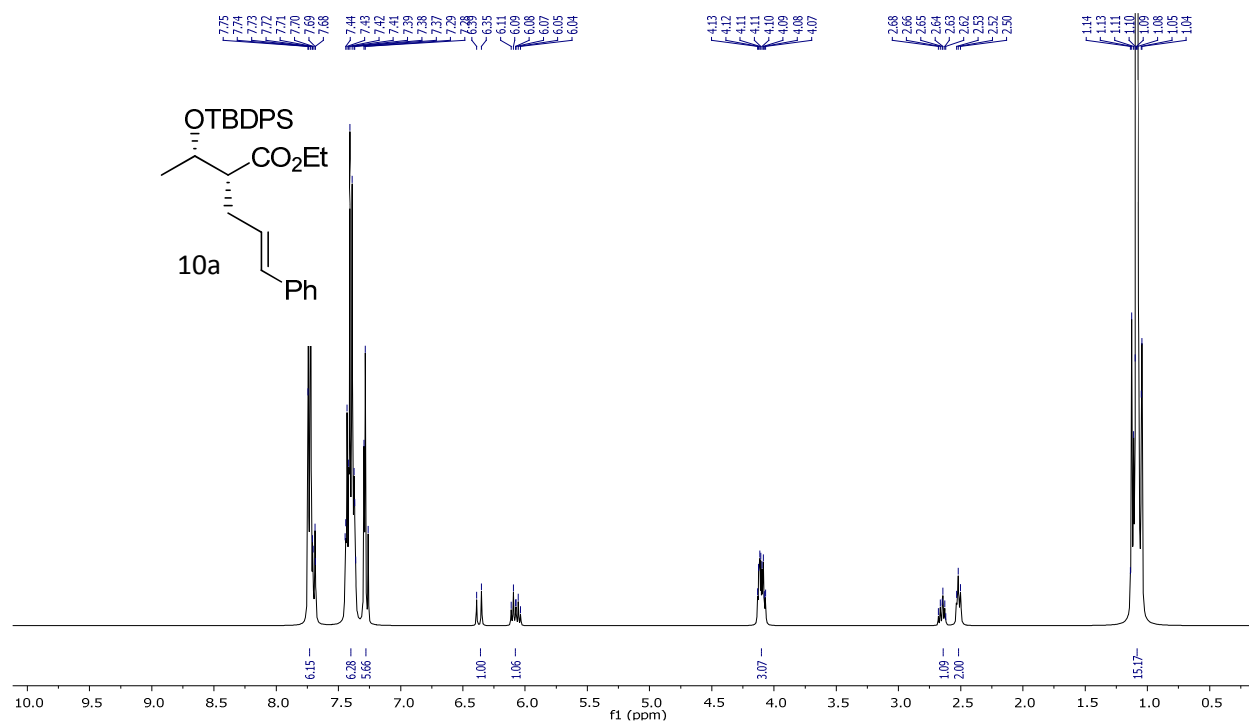

# <sup>13</sup>C NMR of compound (10a) (100 MHz, CDCl<sub>3</sub>)

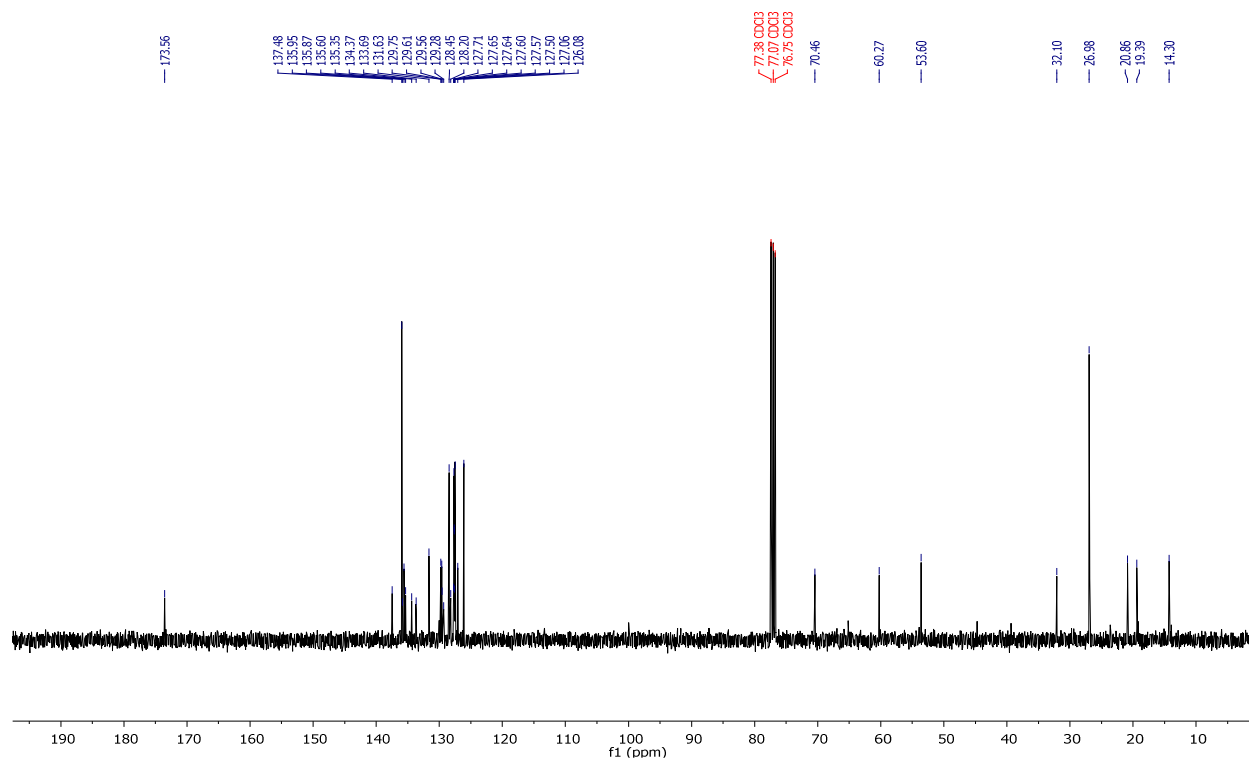

DEPT-135 of compound (10a) (100 MHz, CDCl<sub>3</sub>)

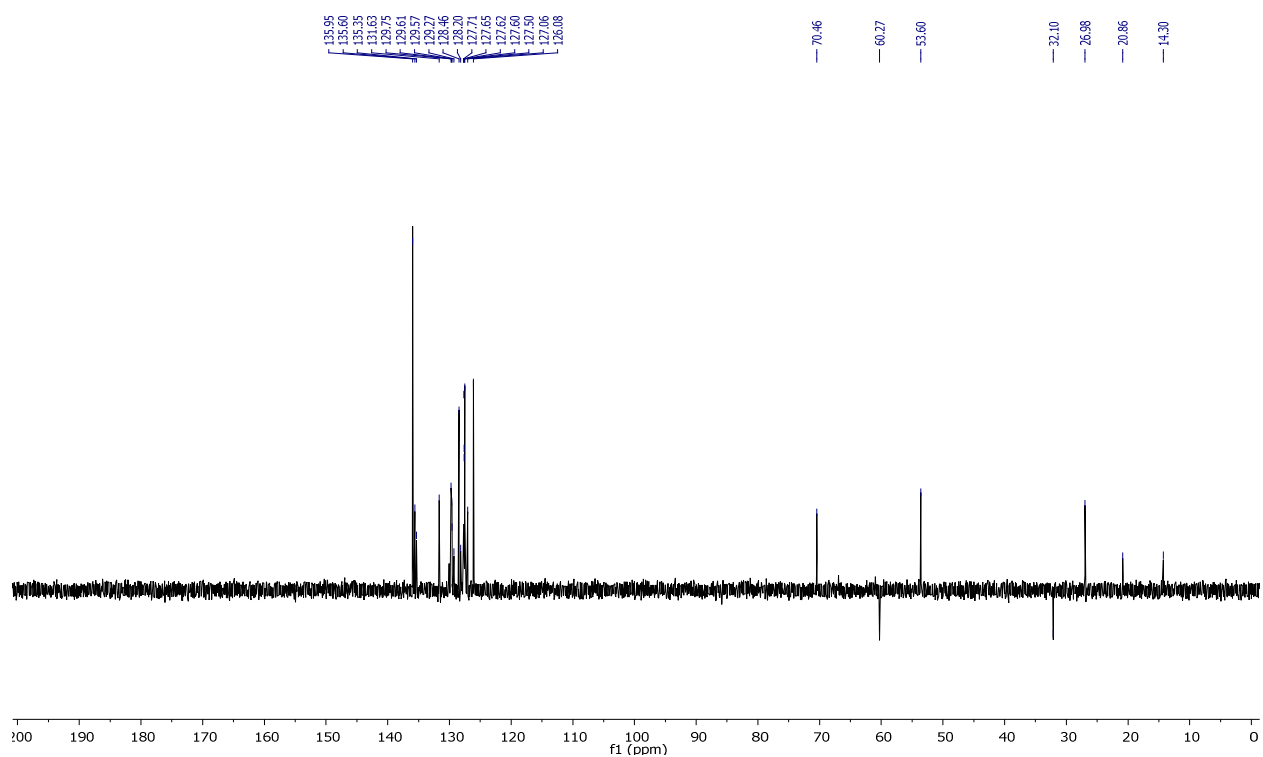

<sup>1</sup>H NMR of compound (10b) (400 MHz, CDCl<sub>3</sub>)

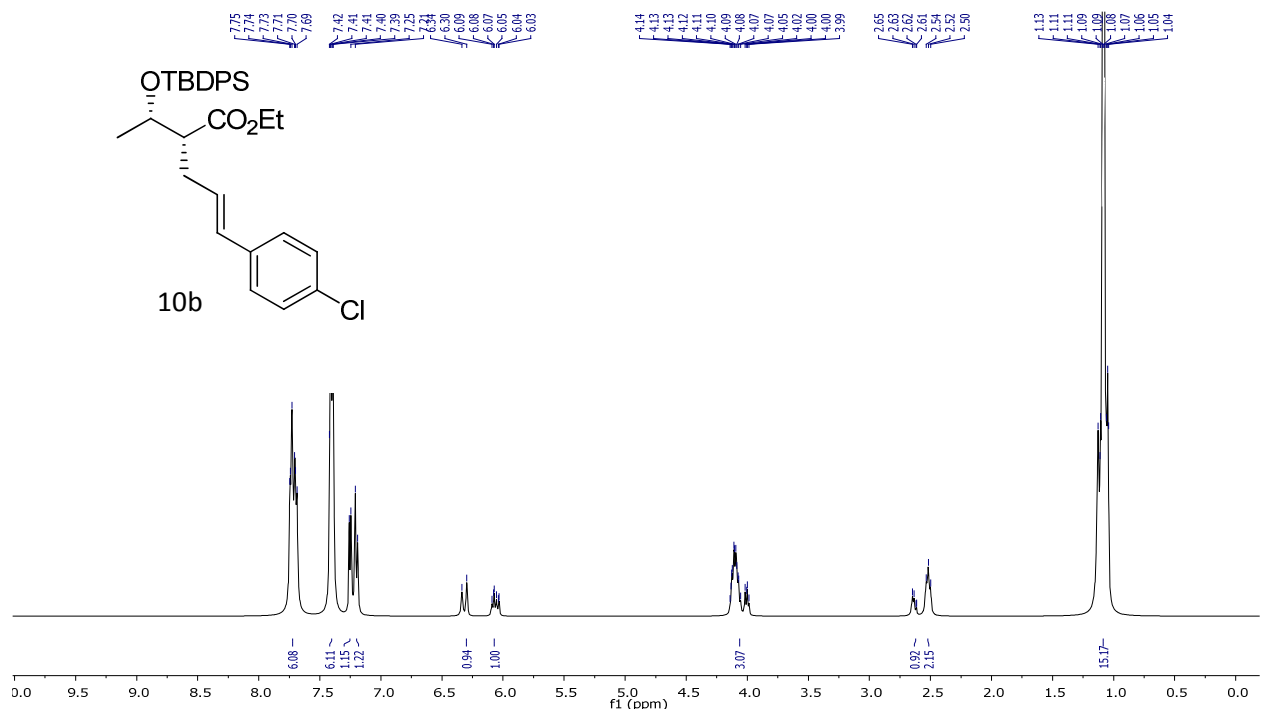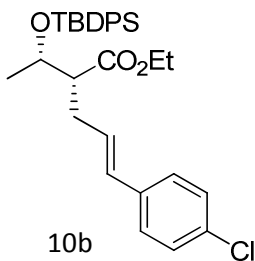



**$^{13}\text{C}$  NMR of compound (10b) (100 MHz,  $\text{CDCl}_3$ )**

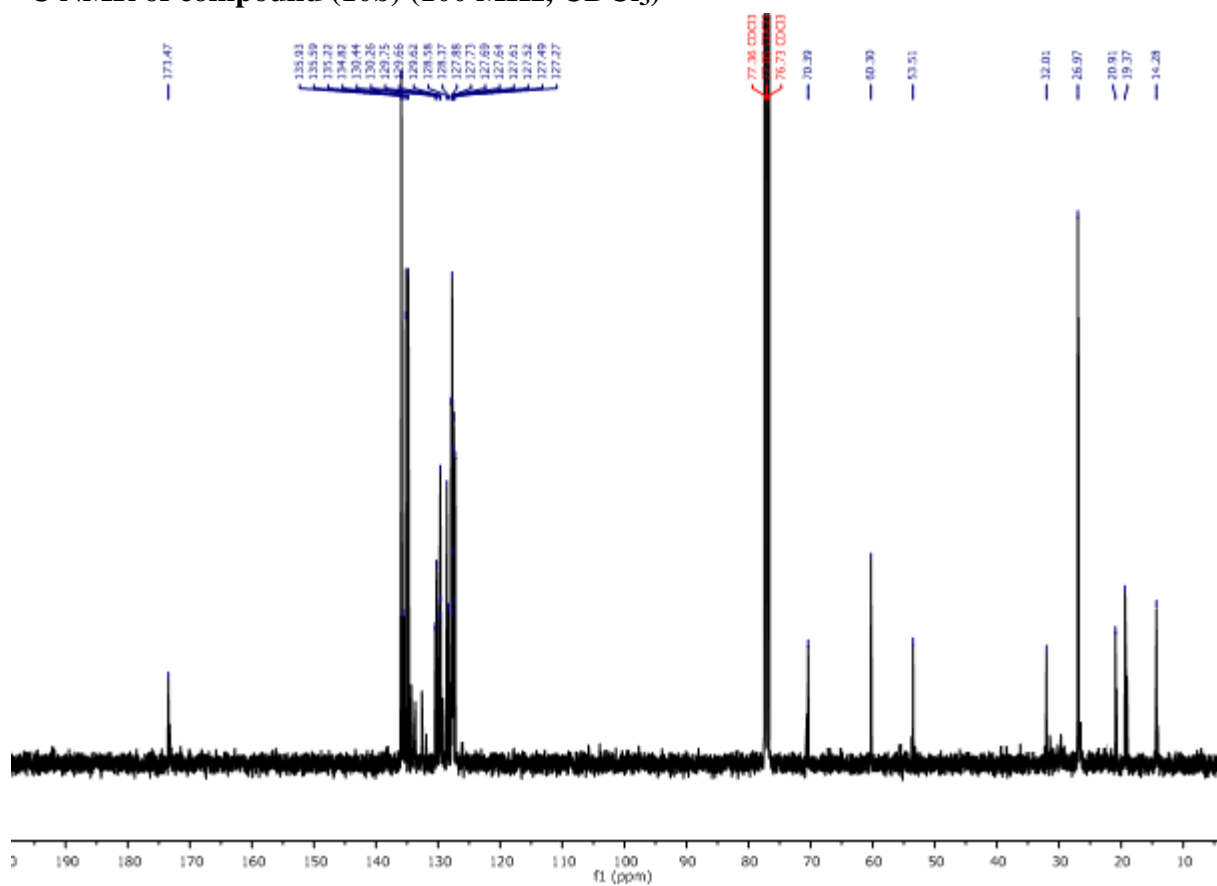

**DEPT-135 of compound (10b) (100 MHz,  $\text{CDCl}_3$ )**

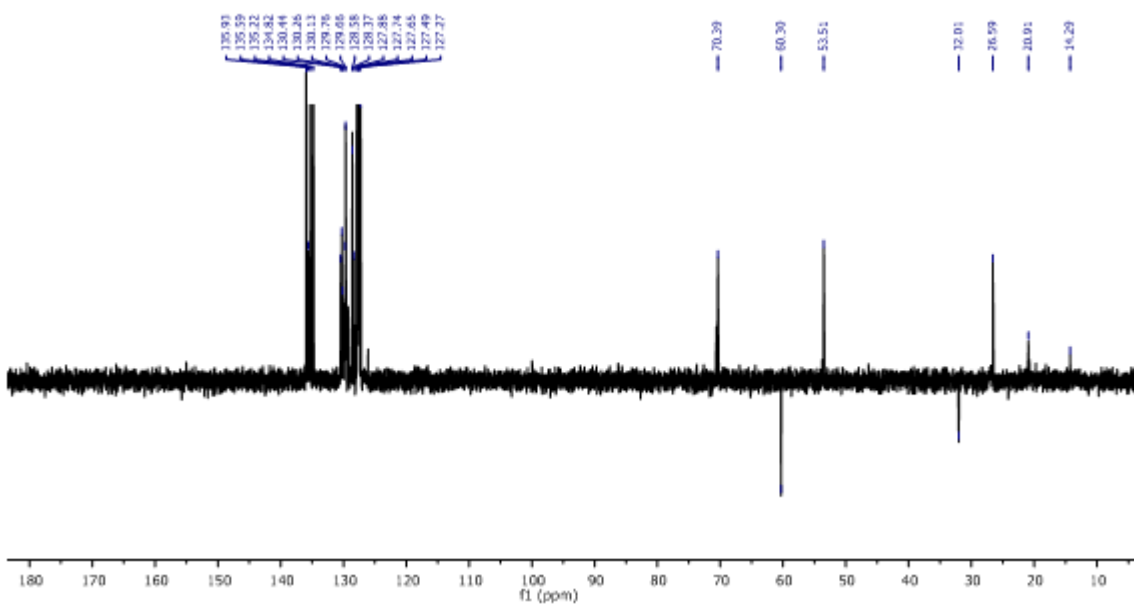

### $^1\text{H}$ NMR of compound (10c) (400 MHz, $\text{CDCl}_3$ )

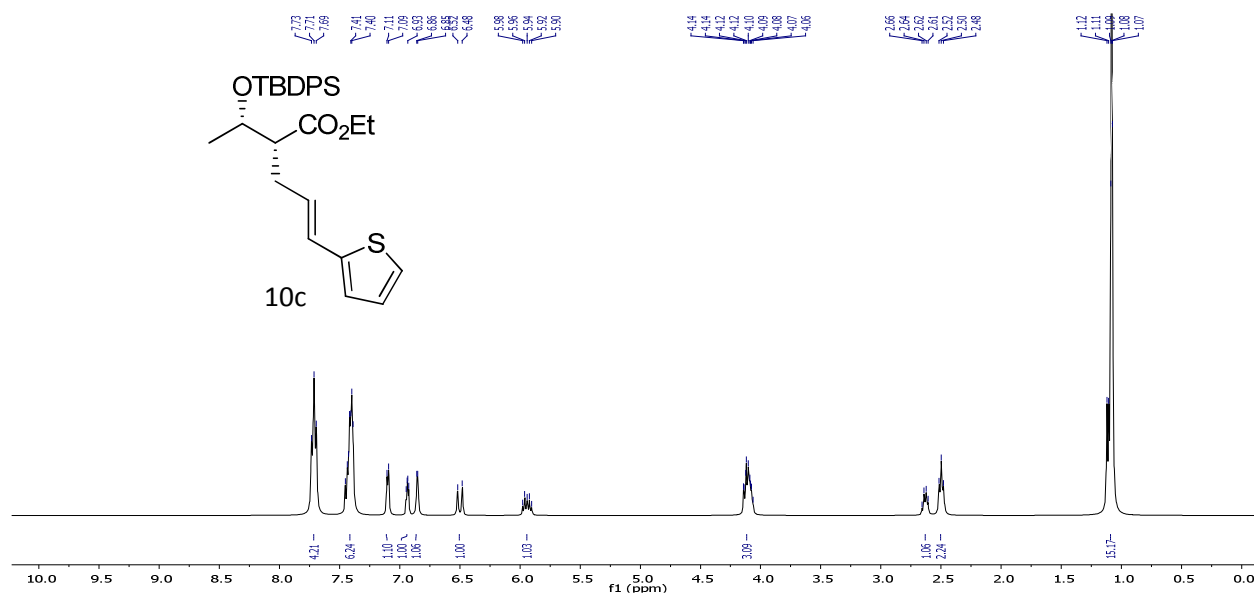

### $^{13}\text{C}$ NMR of compound (10c) (100 MHz, $\text{CDCl}_3$ )

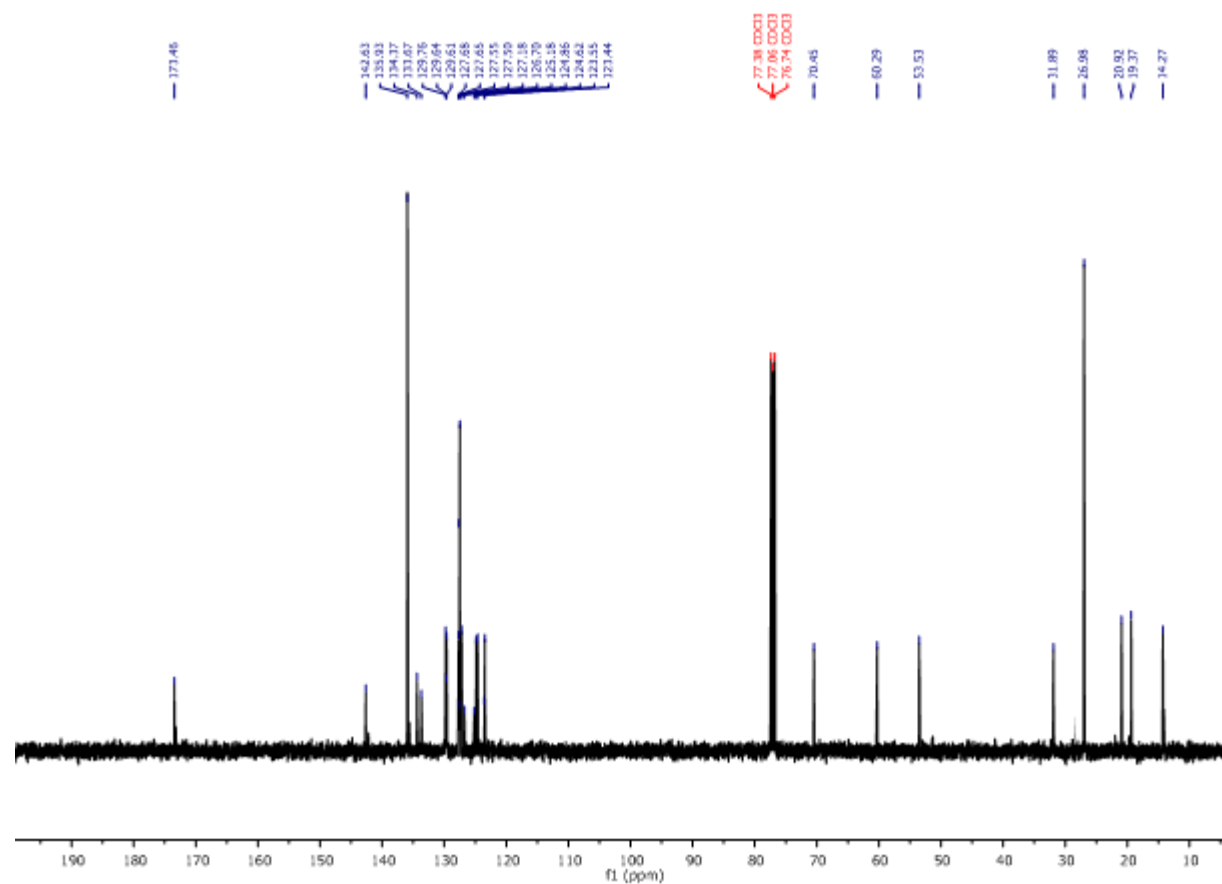

DEPT-135 of compound (10c) (100 MHz, CDCl<sub>3</sub>)

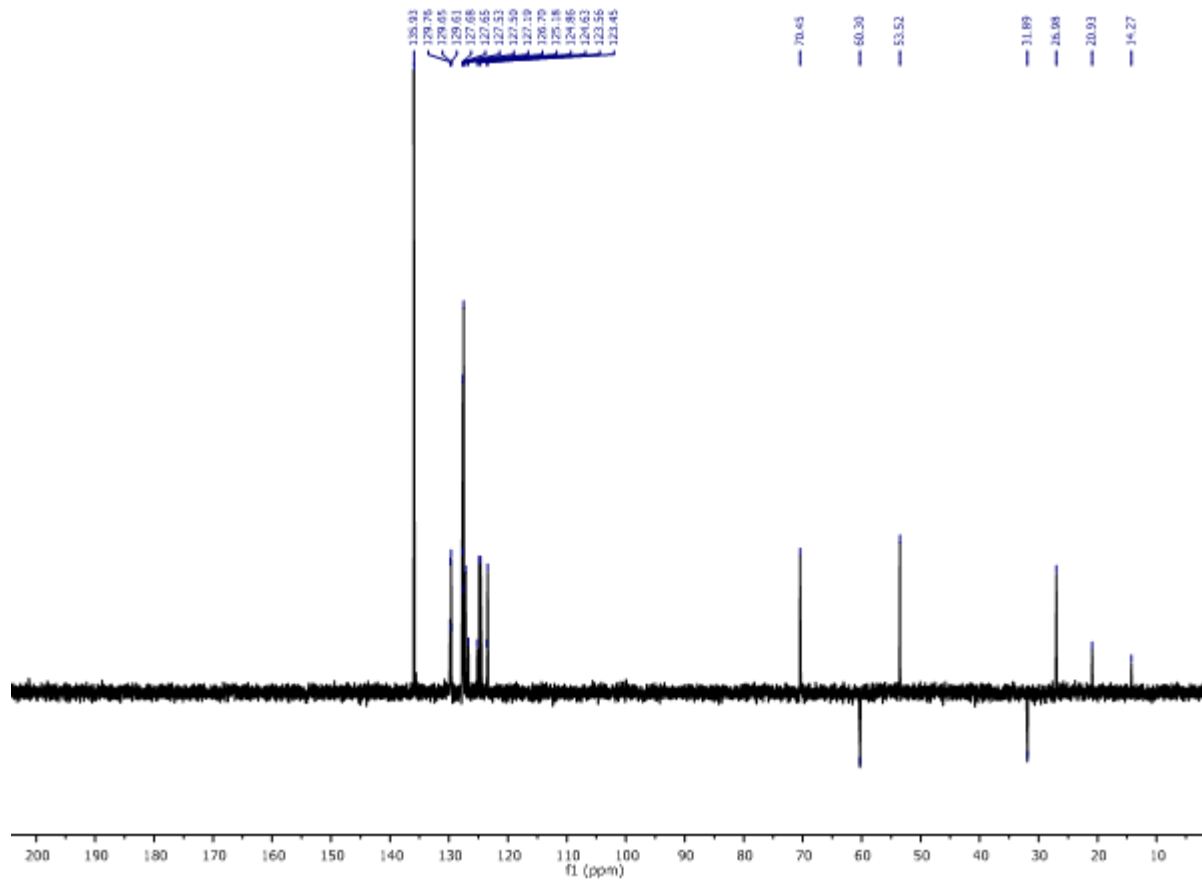

<sup>1</sup>H NMR of compound (11a) (400 MHz, CDCl<sub>3</sub>)

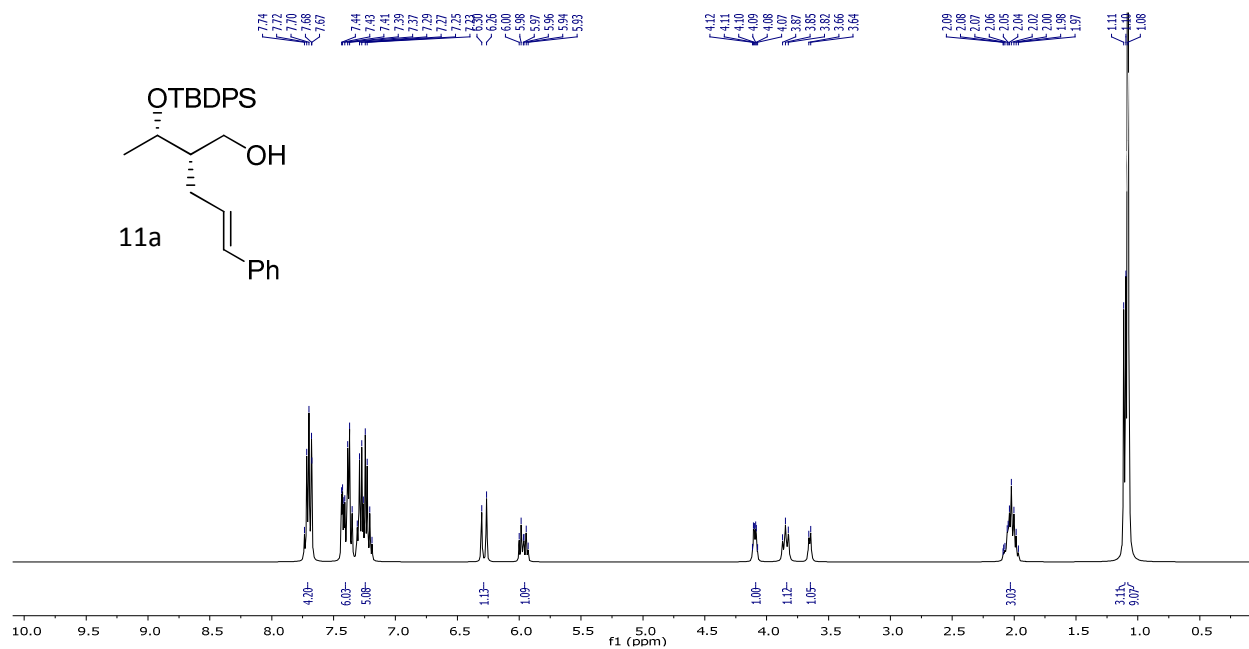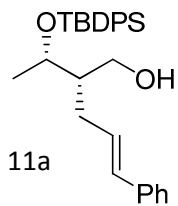

### $^{13}\text{C}$ NMR of compound (11a) (100 MHz, $\text{CDCl}_3$ )

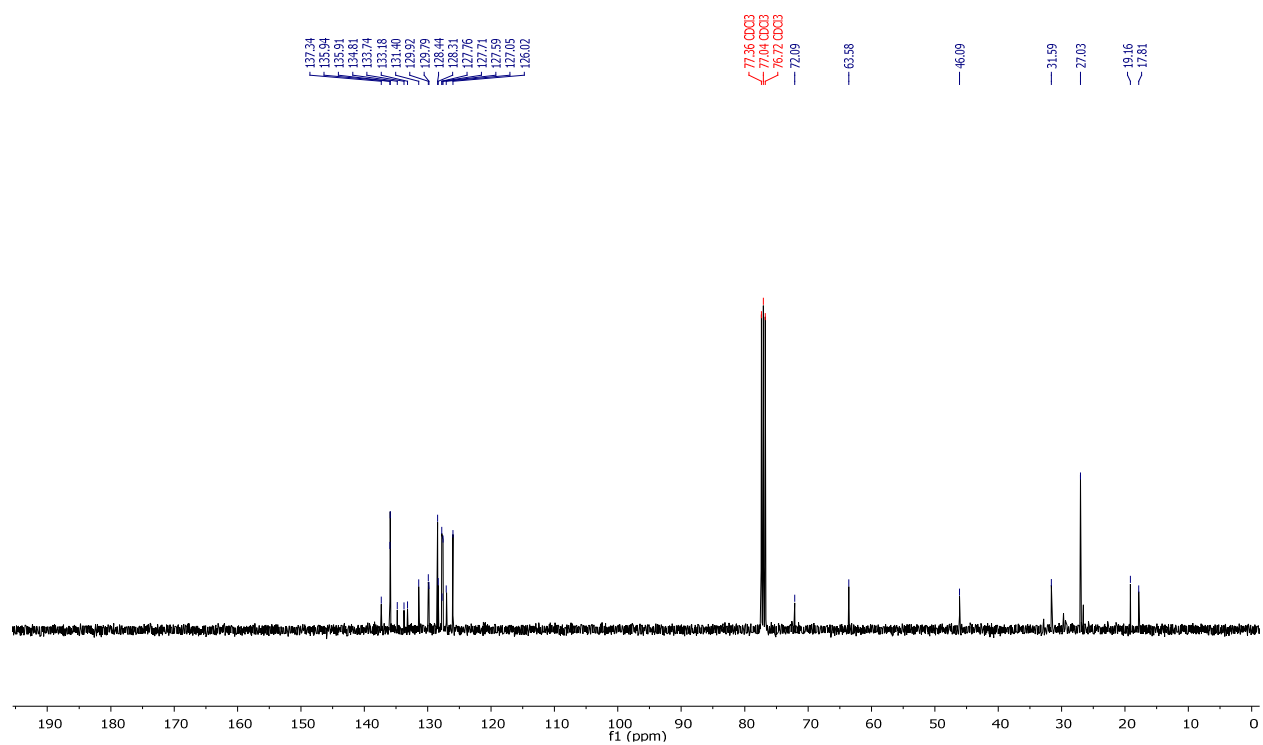

### DEPT-135 of compound (11a) (100 MHz, $\text{CDCl}_3$ )

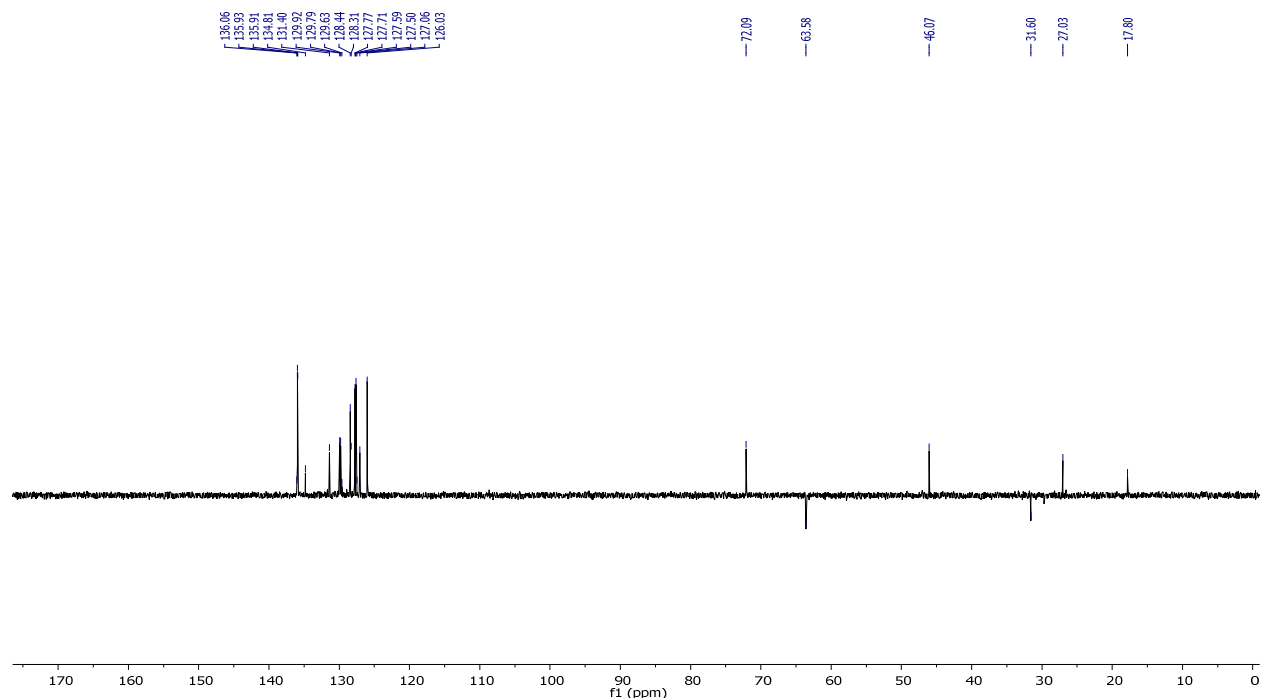

**<sup>1</sup>H NMR of compound (11b) (600 MHz, CDCl<sub>3</sub>)**

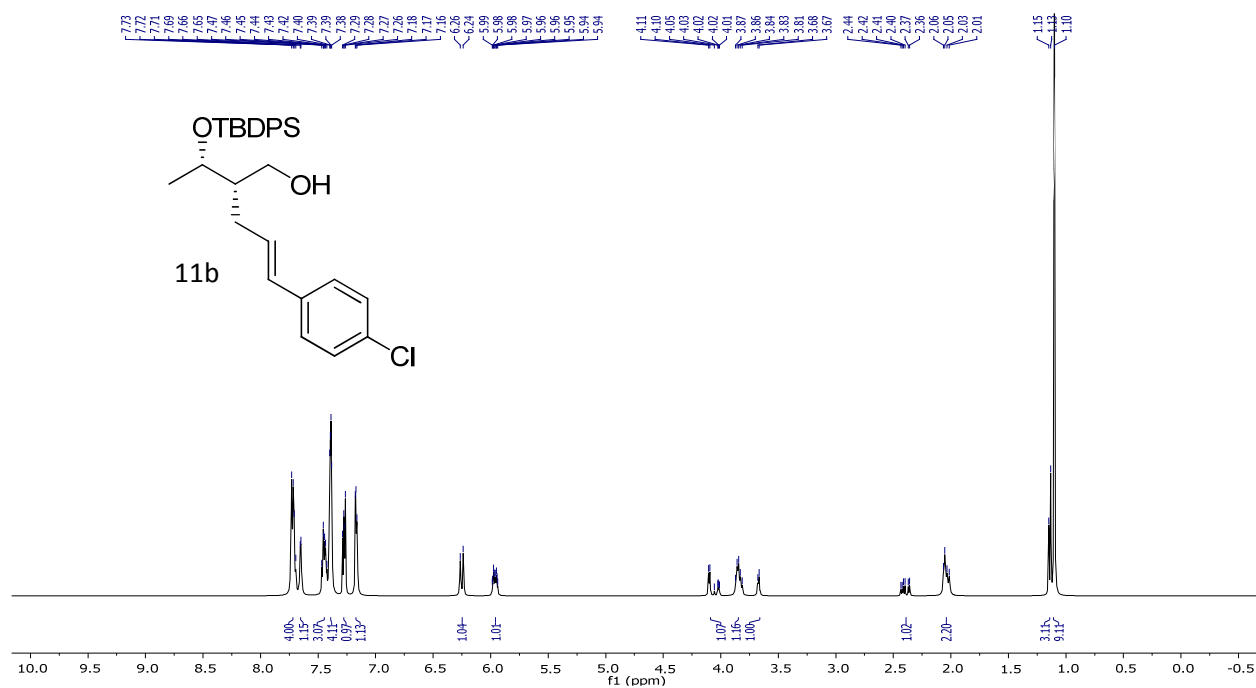

**<sup>13</sup>C NMR of compound (11b) (150 MHz, CDCl<sub>3</sub>)**

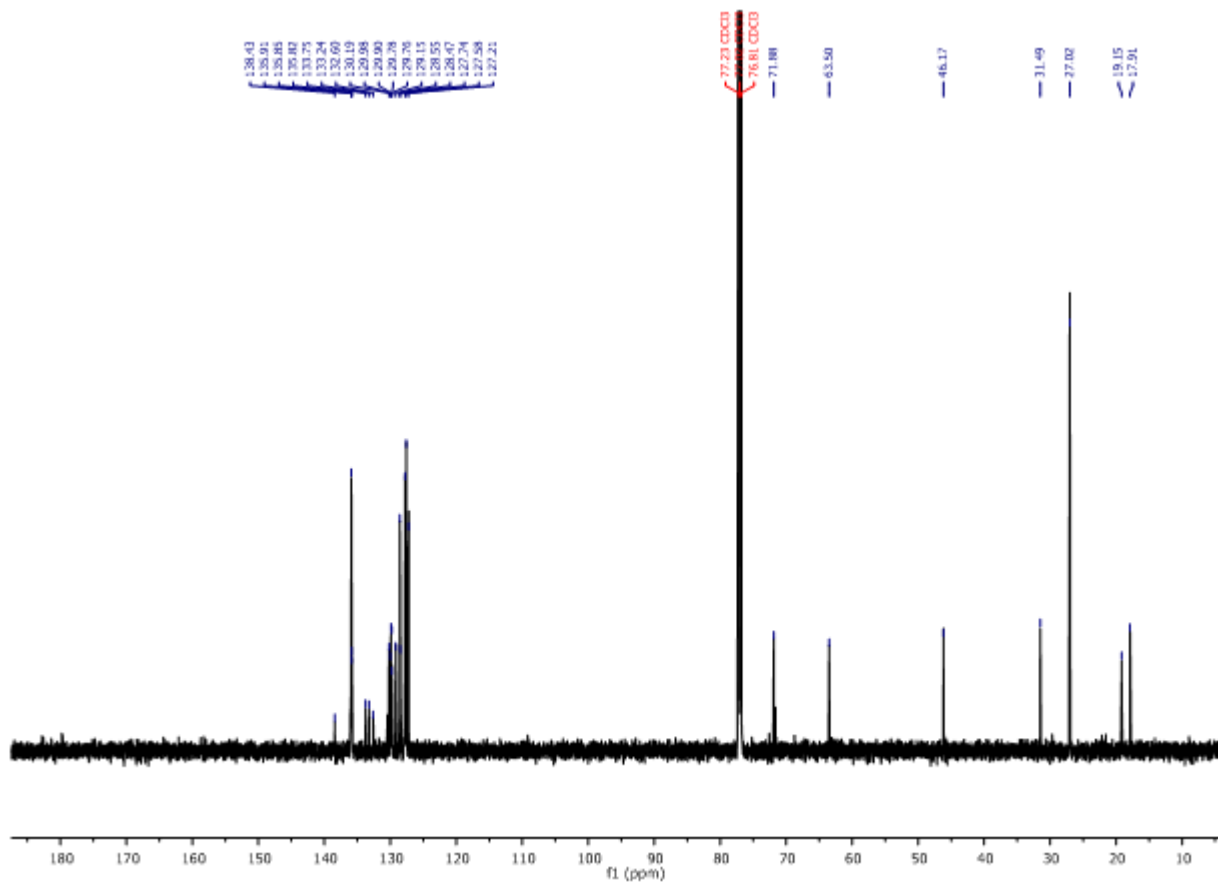

DEPT-135 of compound (11b) (150 MHz, CDCl<sub>3</sub>)

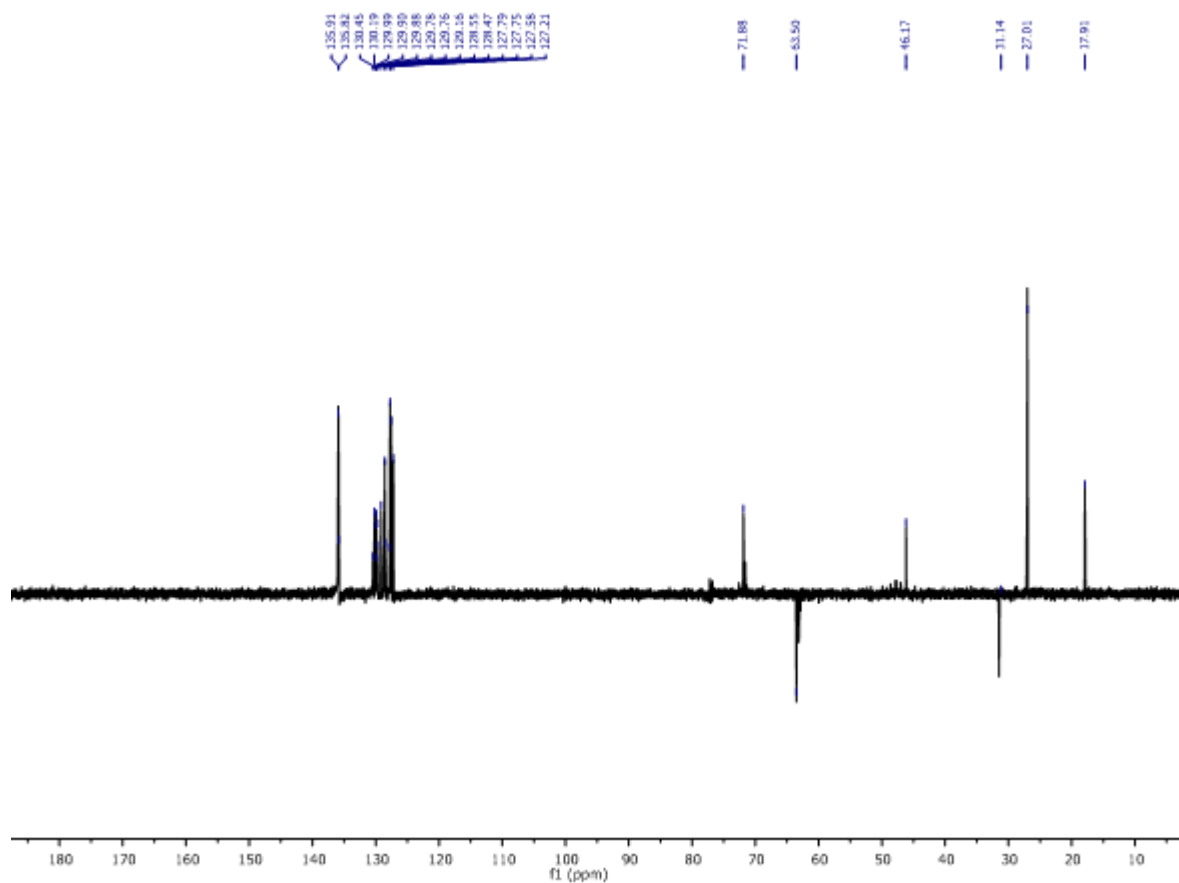

<sup>1</sup>H NMR of compound (11c) (400 MHz, CDCl<sub>3</sub>)

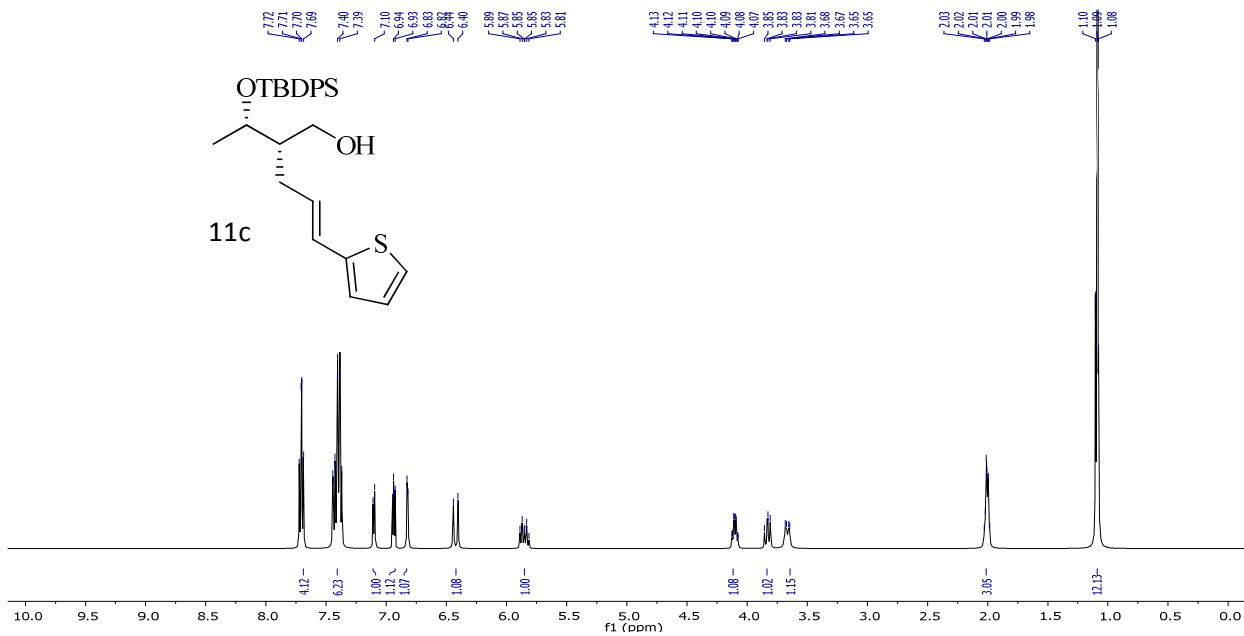

### $^{13}\text{C}$ NMR of compound (11c) (100 MHz, $\text{CDCl}_3$ )

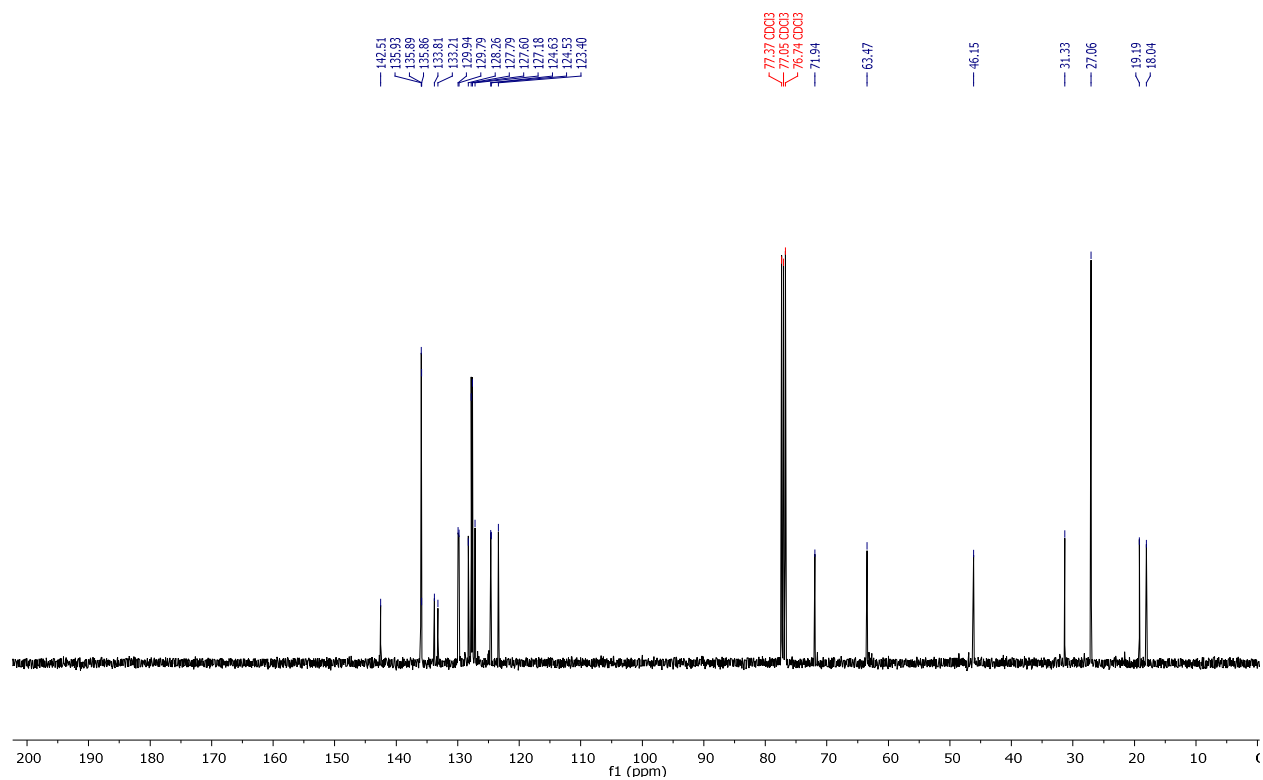

### DEPT-135 of compound (11c) (100 MHz, $\text{CDCl}_3$ )

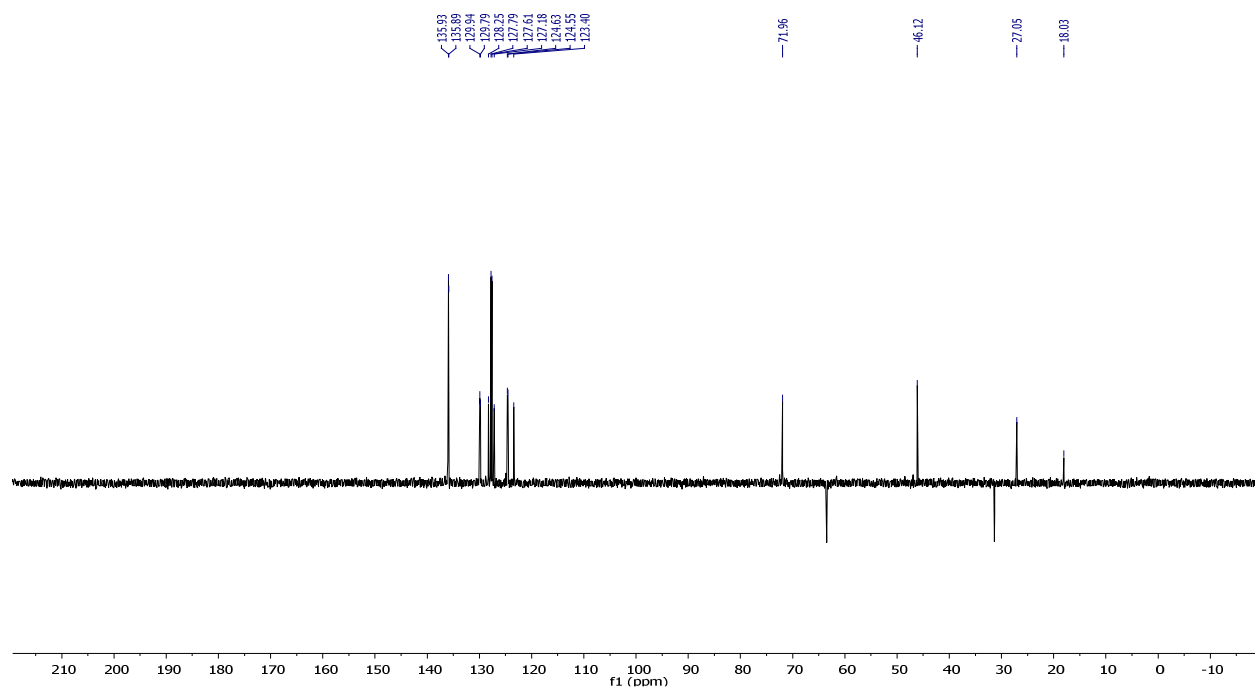

**<sup>1</sup>H NMR of compound (12a) (600 MHz, CDCl<sub>3</sub>)**

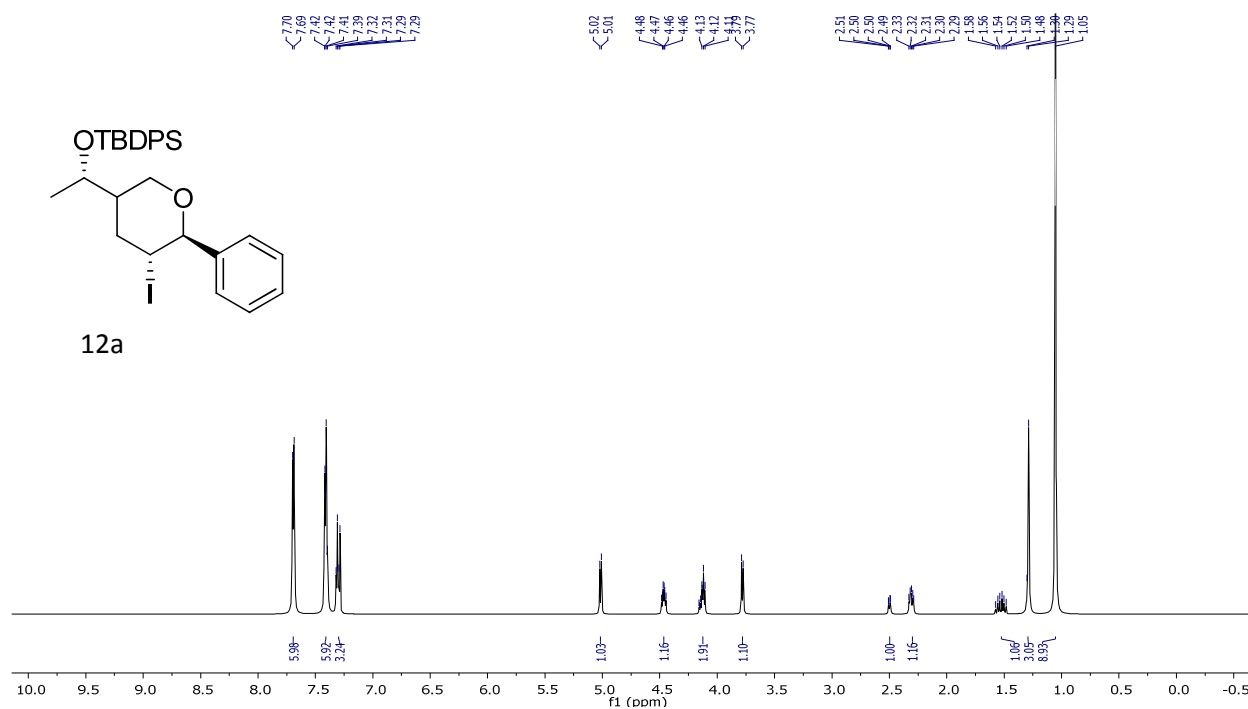

**<sup>13</sup>C NMR of compound (12a) (150 MHz, CDCl<sub>3</sub>)**

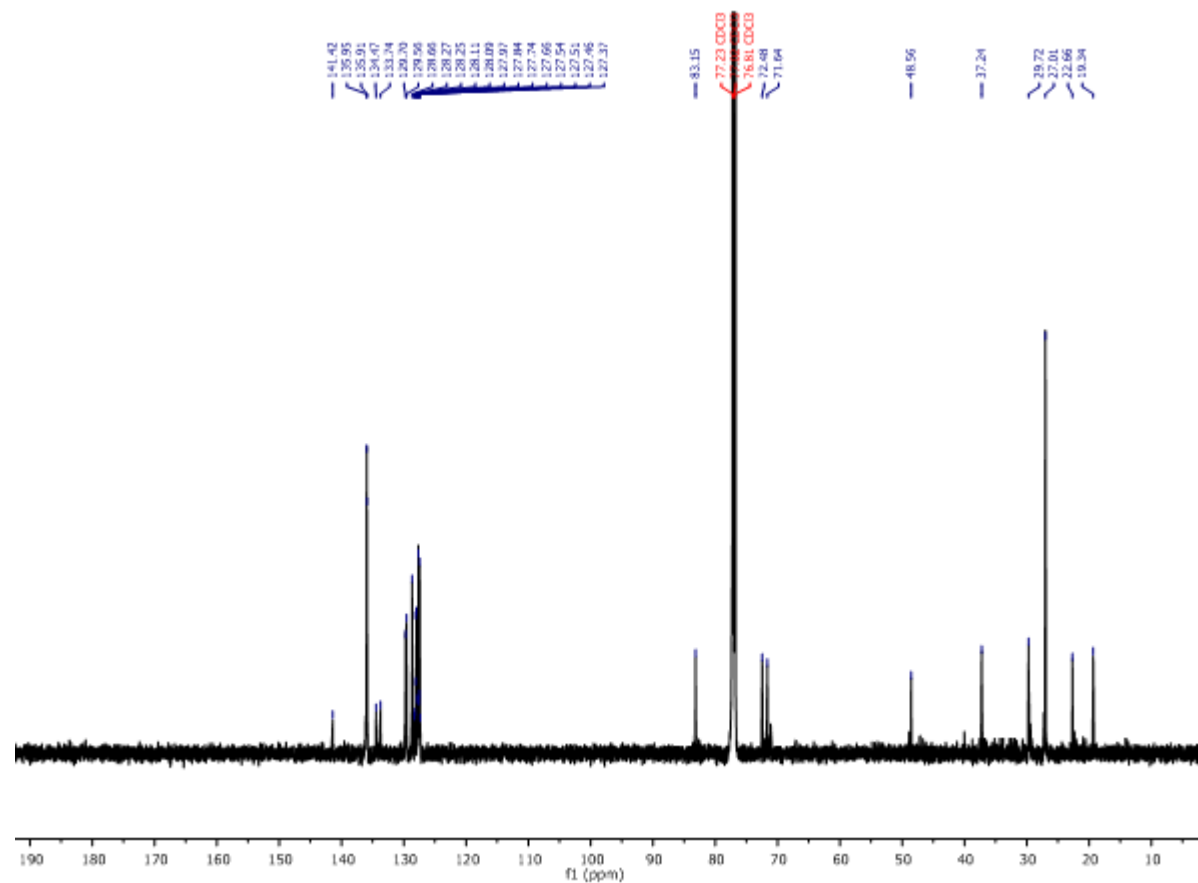



DEPT-135 of compound (12a) (150 MHz, CDCl<sub>3</sub>)

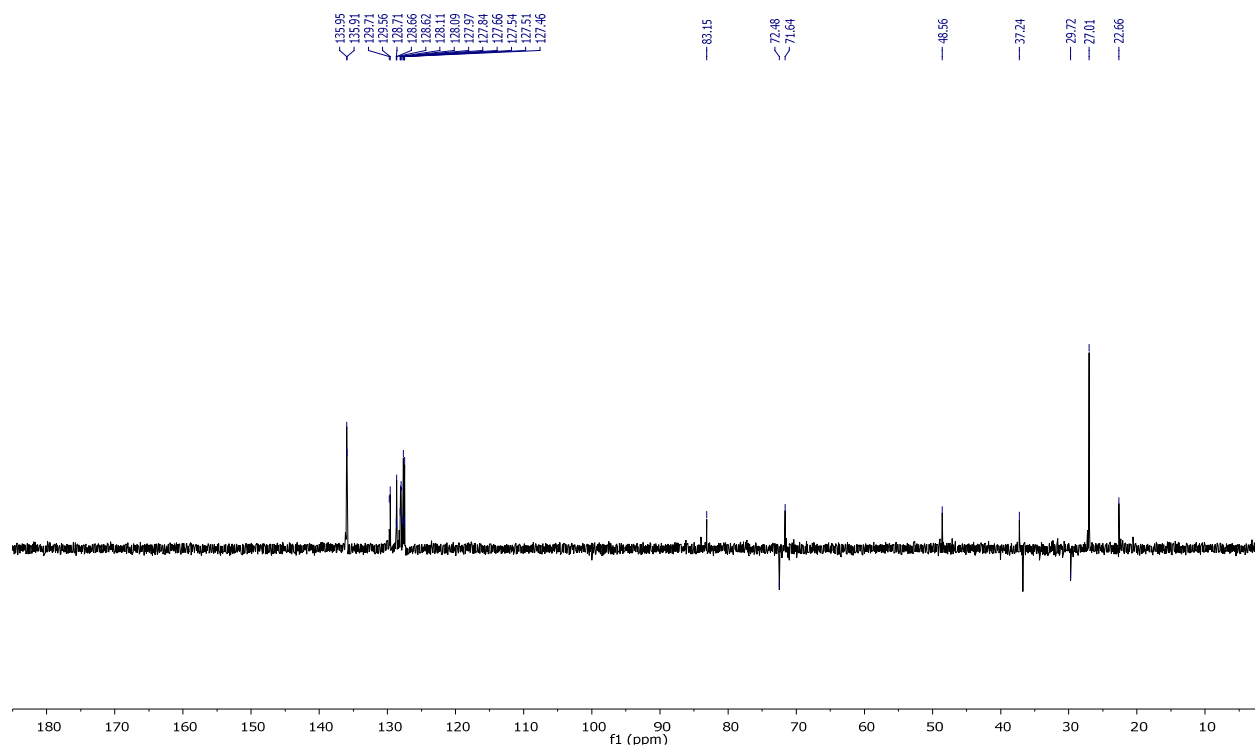

<sup>1</sup>H NMR of compound (12b) (600 MHz, CDCl<sub>3</sub>)

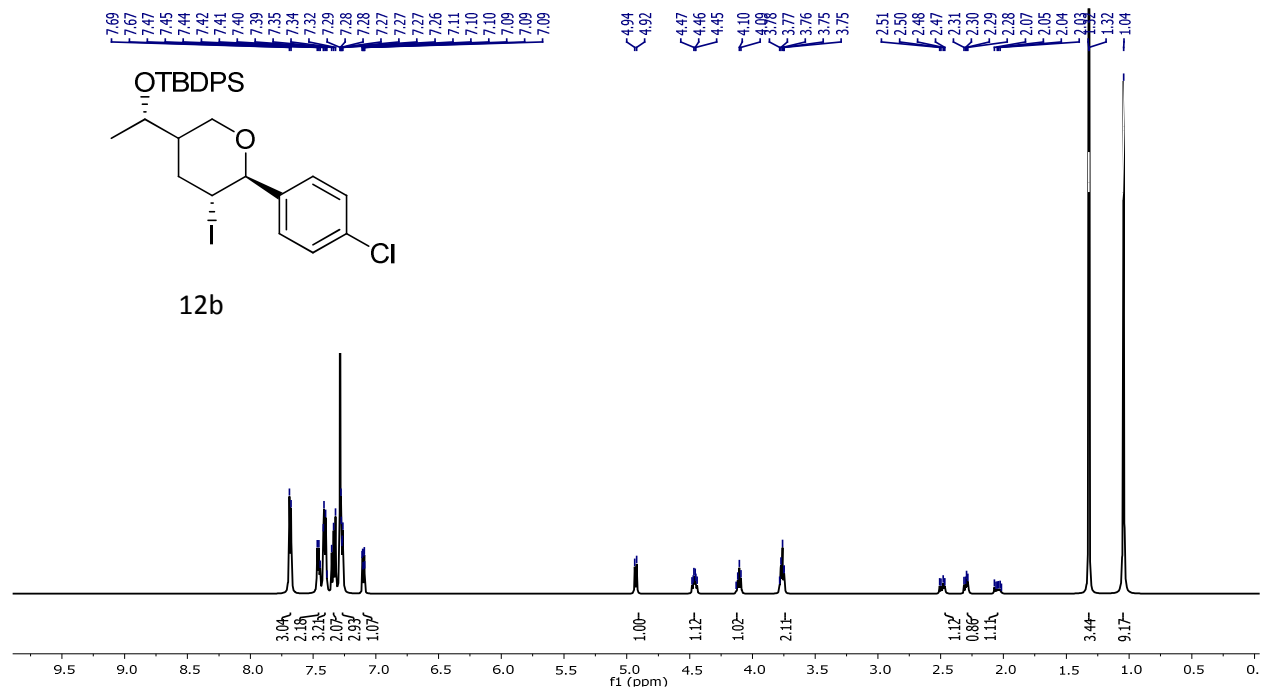

**$^{13}\text{C}$  NMR of compound (12b) (150 MHz,  $\text{CDCl}_3$ )**

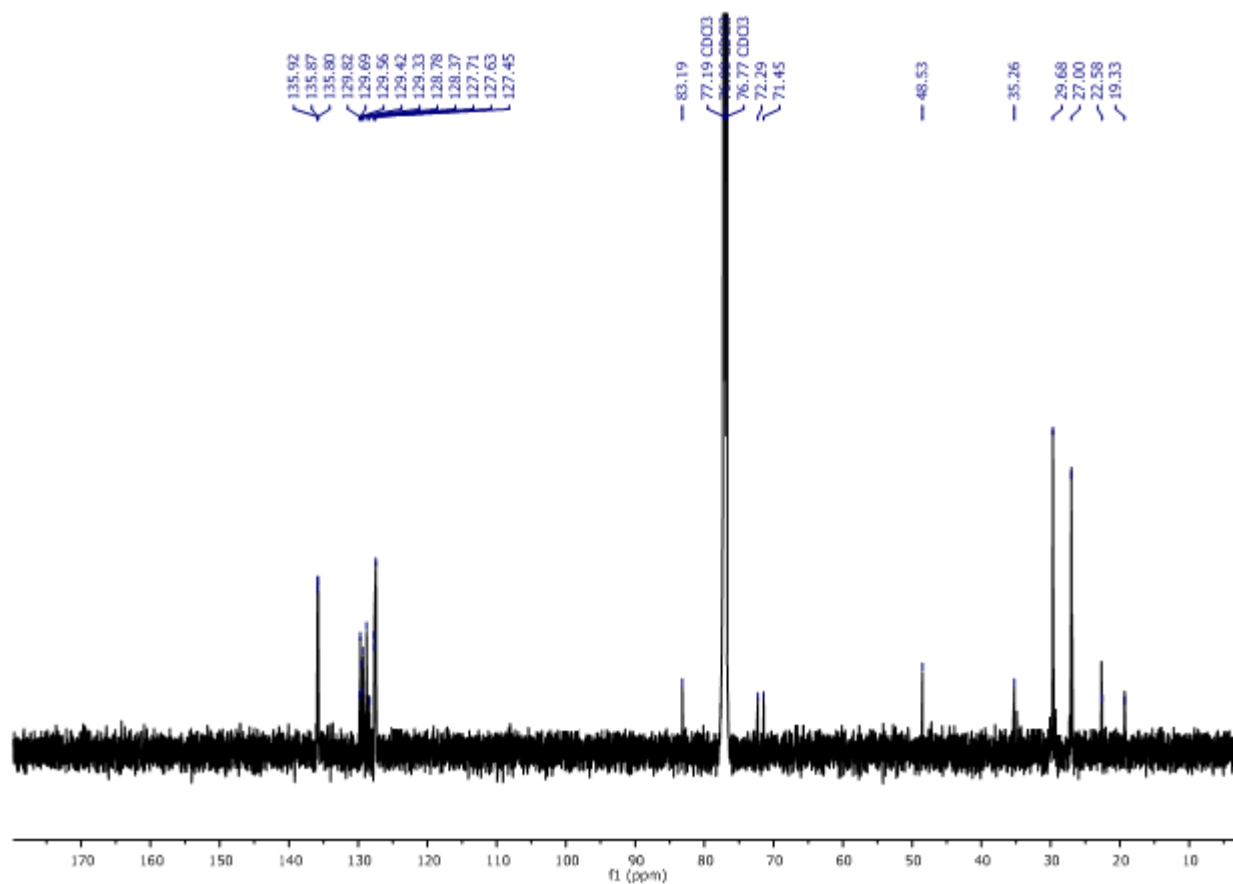

**DEPT-135 of compound (12b) (150 MHz,  $\text{CDCl}_3$ )**

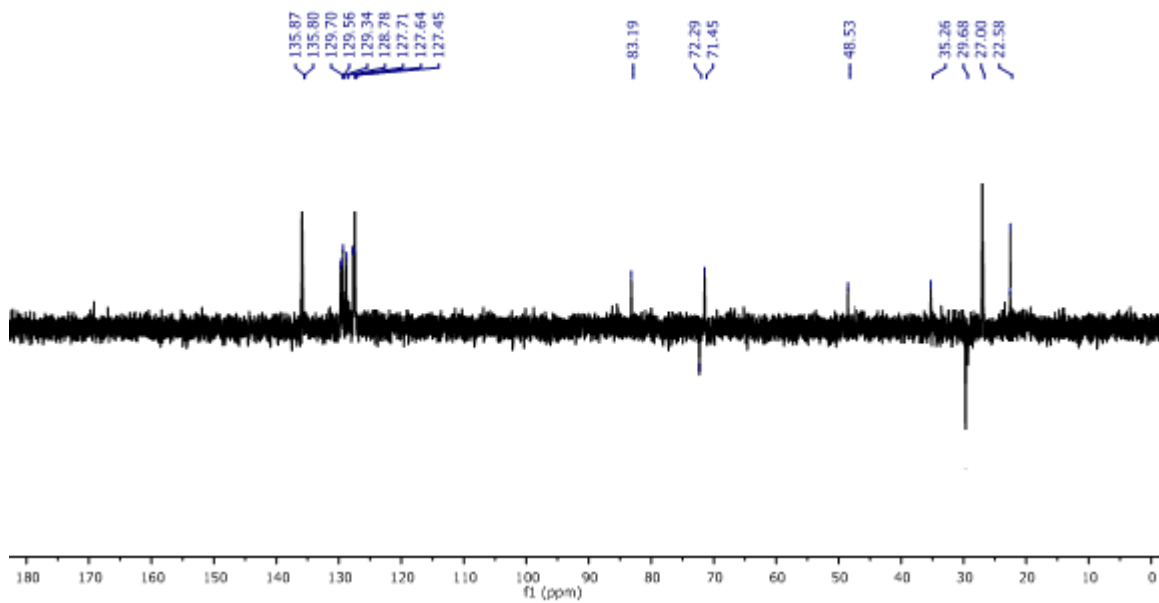

# $^1\text{H}$ NMR of compound (12c) (600 MHz, $\text{CDCl}_3$ )

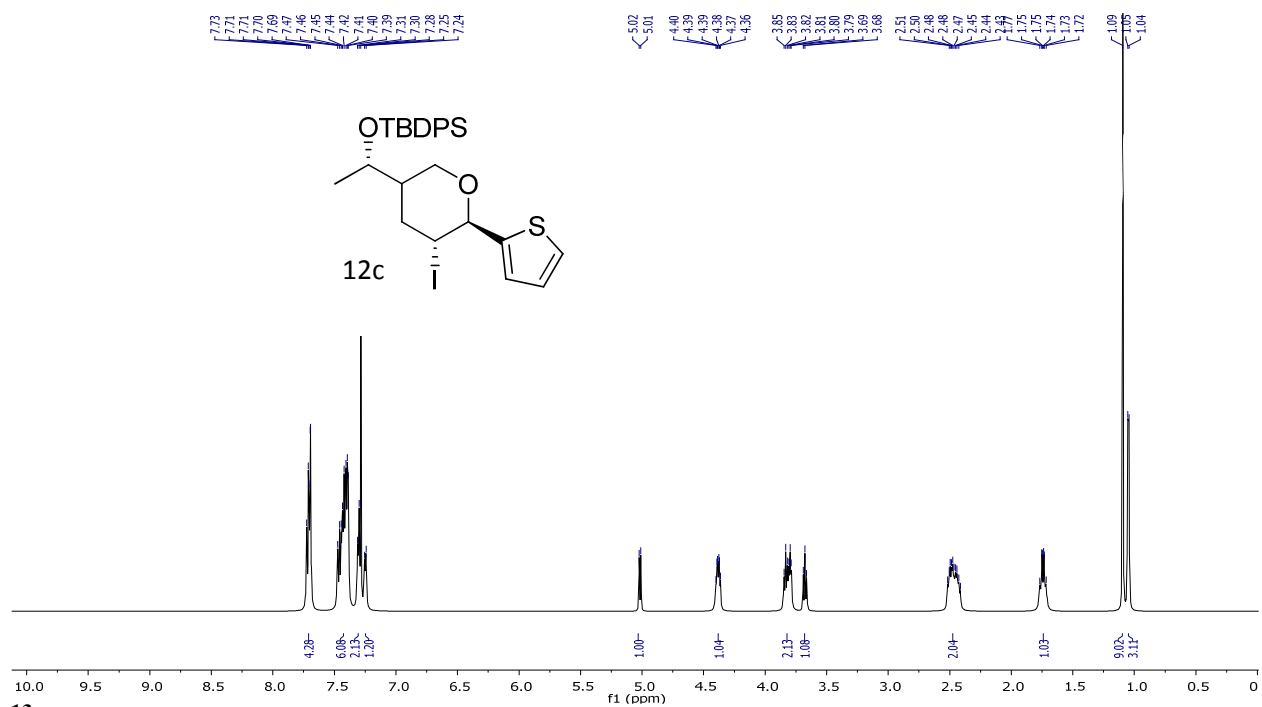

# $^{13}\text{C}$ NMR of compound (12c) (100 MHz, $\text{CDCl}_3$ )

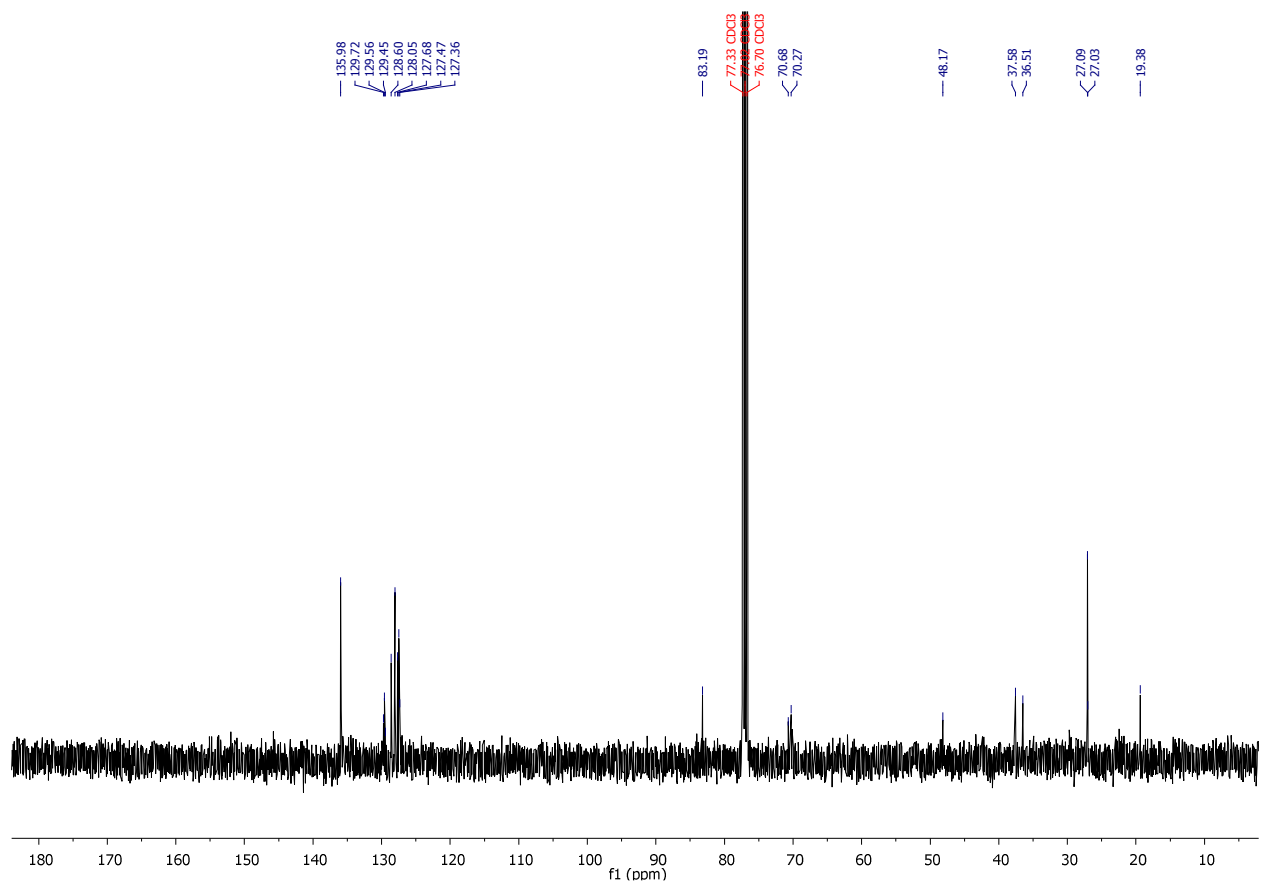

DEPT-135 of compound (12c) (100 MHz, CDCl<sub>3</sub>)

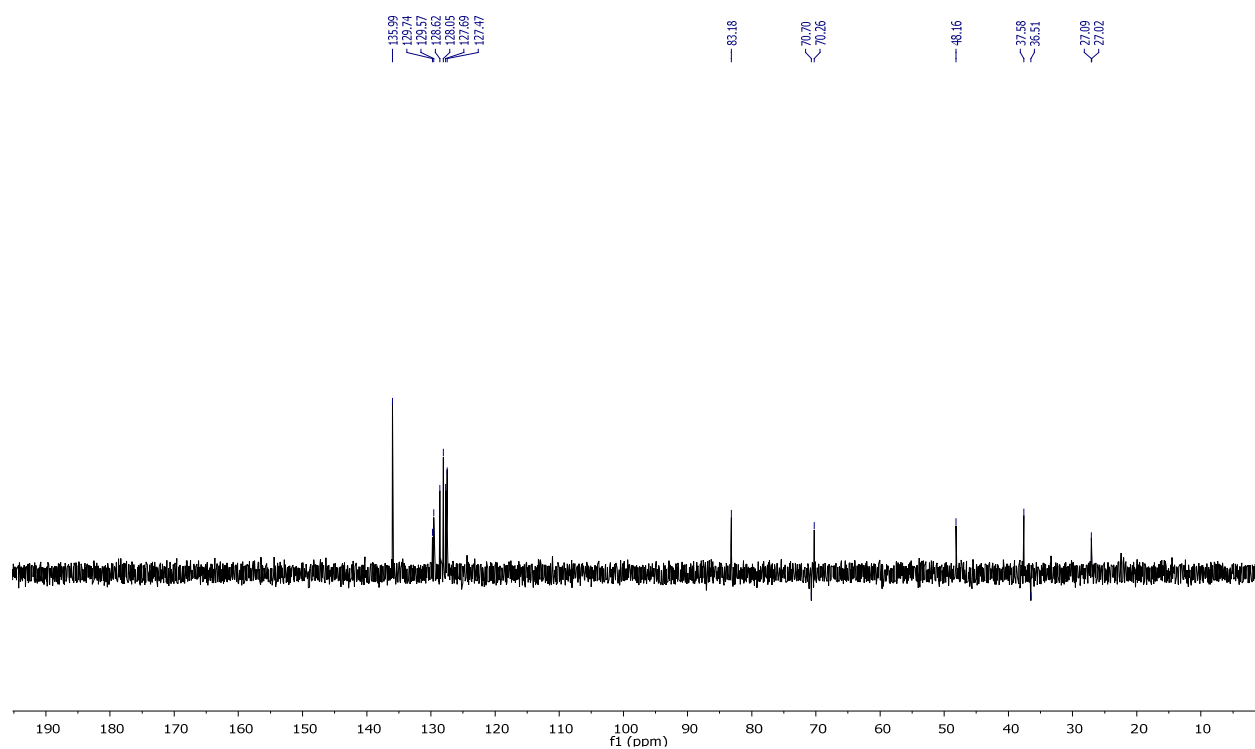

<sup>1</sup>H NMR of compound (13a) (600 MHz, CDCl<sub>3</sub>)

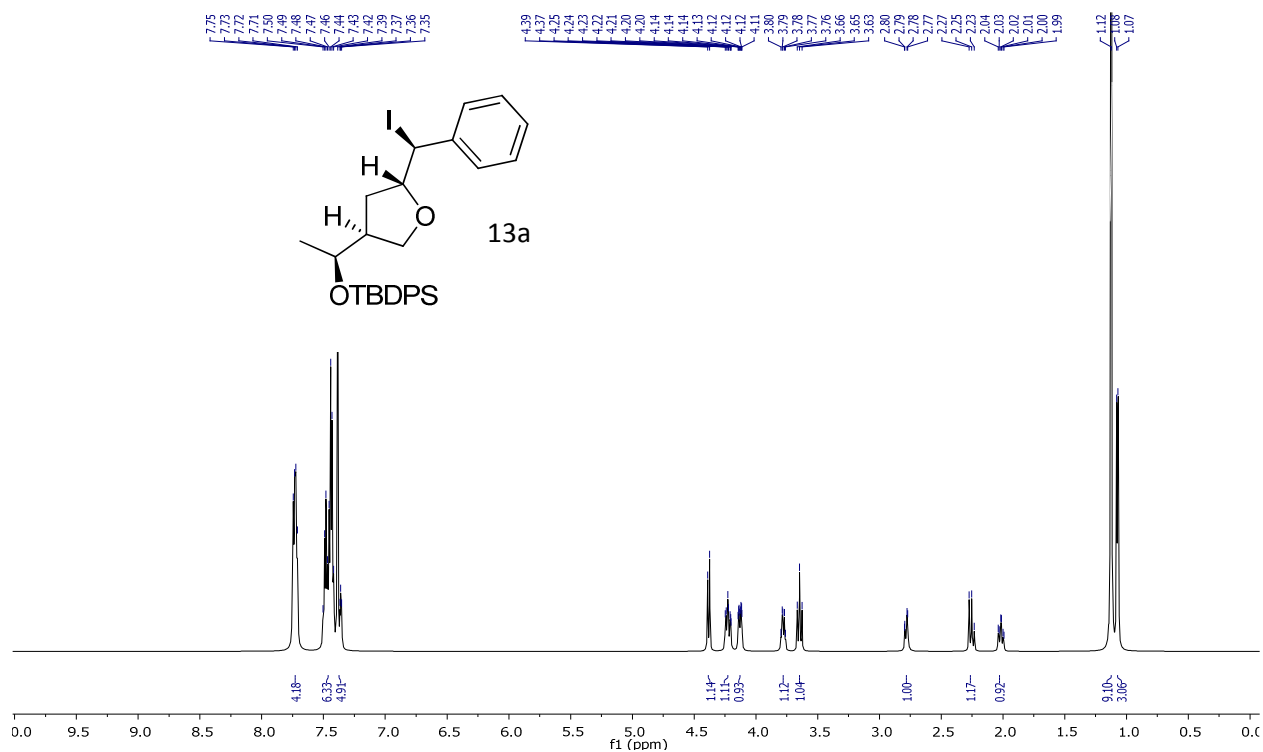

### $^{13}\text{C}$ NMR of compound (13a) (150 MHz, $\text{CDCl}_3$ )

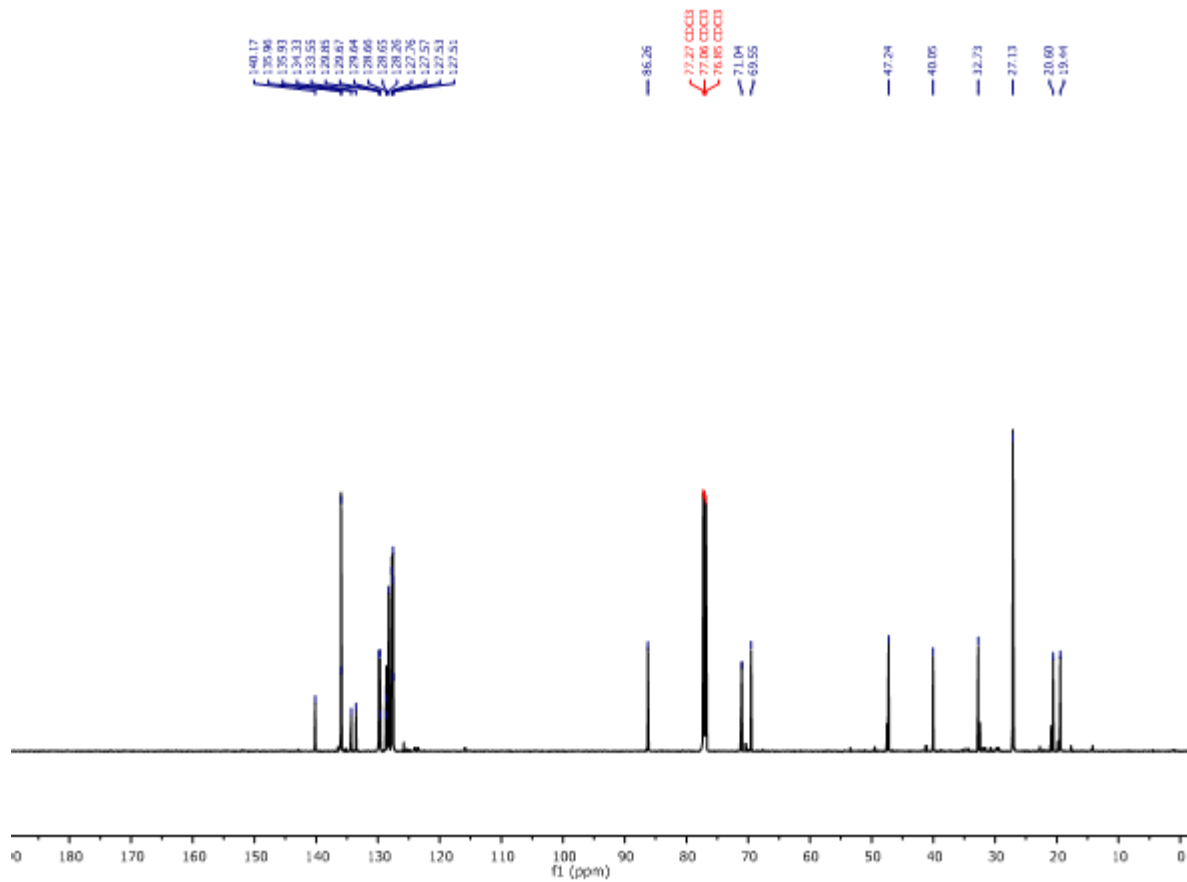

### DEPT-135 of compound (13a) (150 MHz, $\text{CDCl}_3$ )

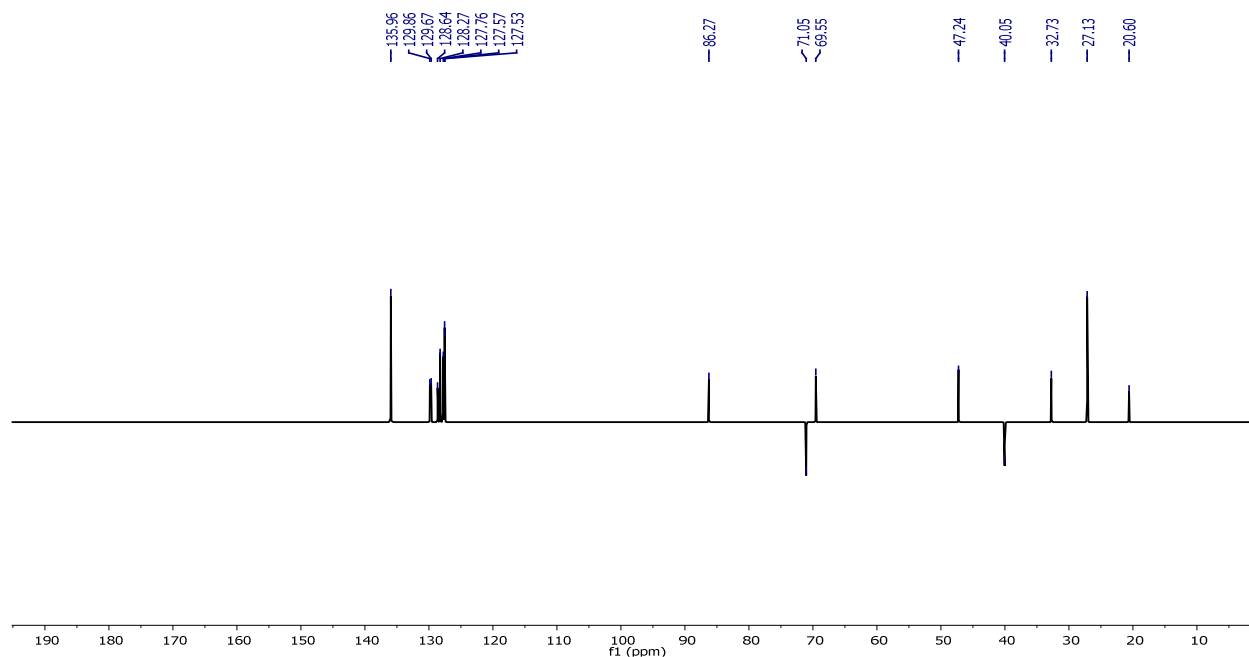

**$^1\text{H}$  NMR of compound (13b) (600 MHz,  $\text{CDCl}_3$ )**

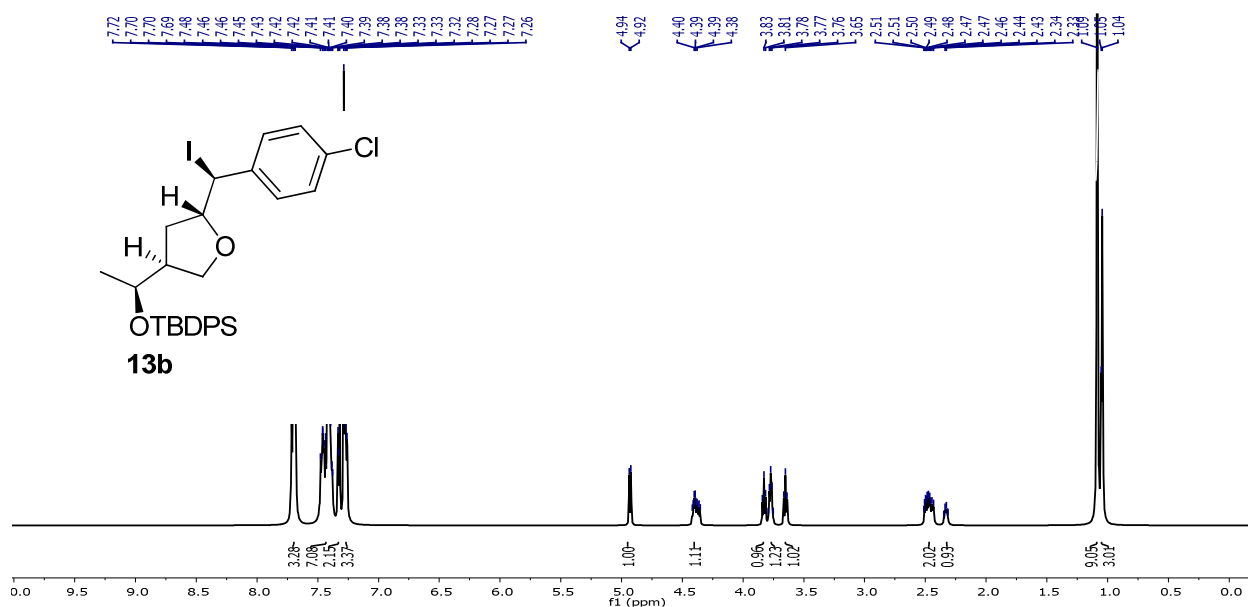

**$^{13}\text{C}$  NMR of compound (13b) (150 MHz,  $\text{CDCl}_3$ )**

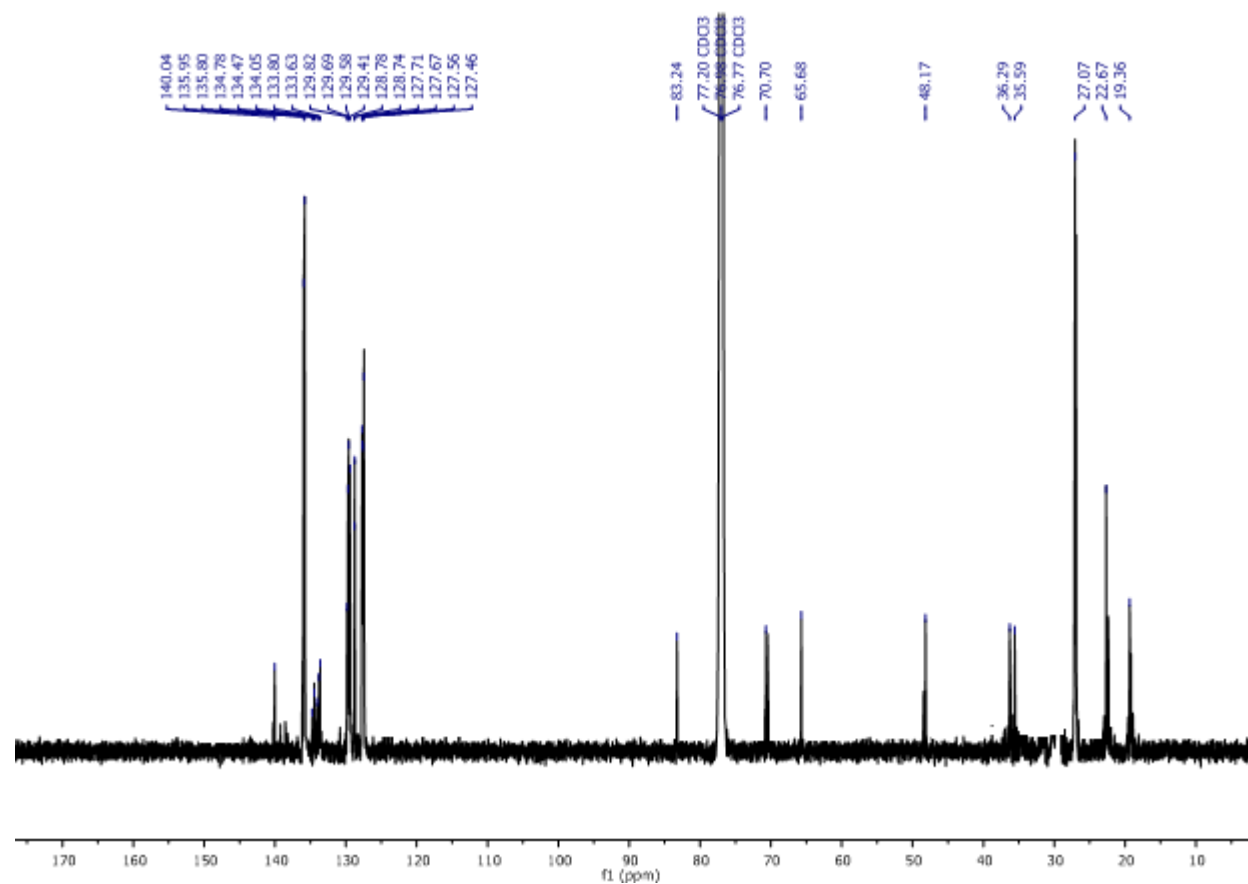

DEPT-135 of compound (13b) (150 MHz, CDCl<sub>3</sub>)

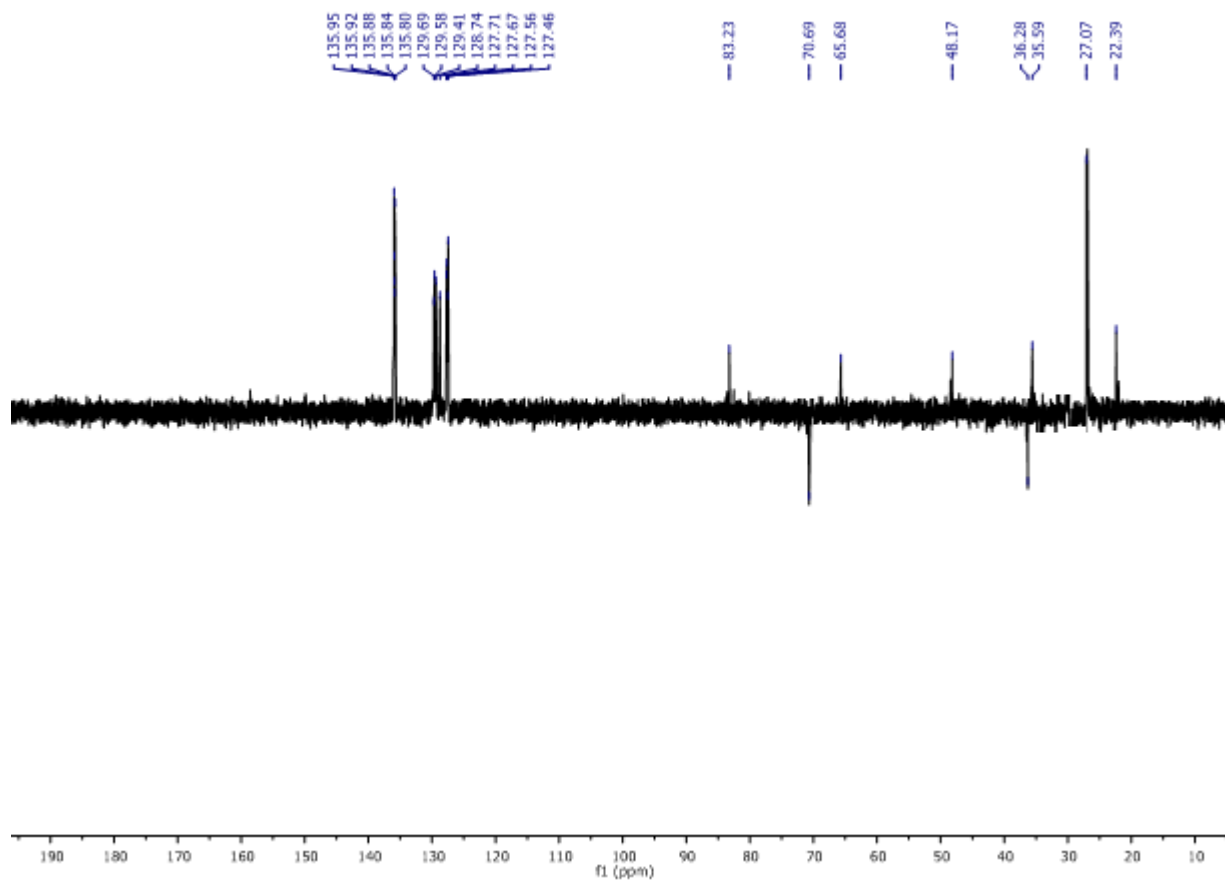

<sup>1</sup>H NMR of compound (13c) (600 MHz, CDCl<sub>3</sub>)

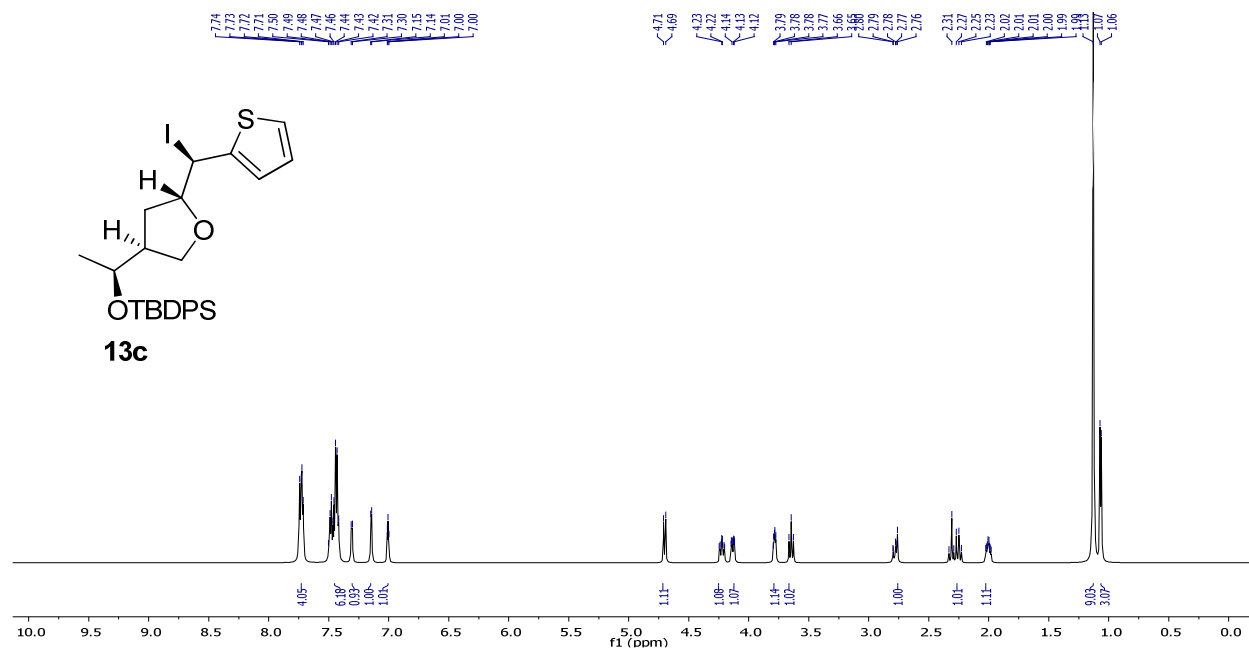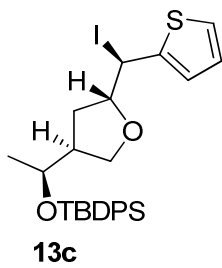

**$^{13}\text{C}$  NMR of compound (13c) (150 MHz,  $\text{CDCl}_3$ )**

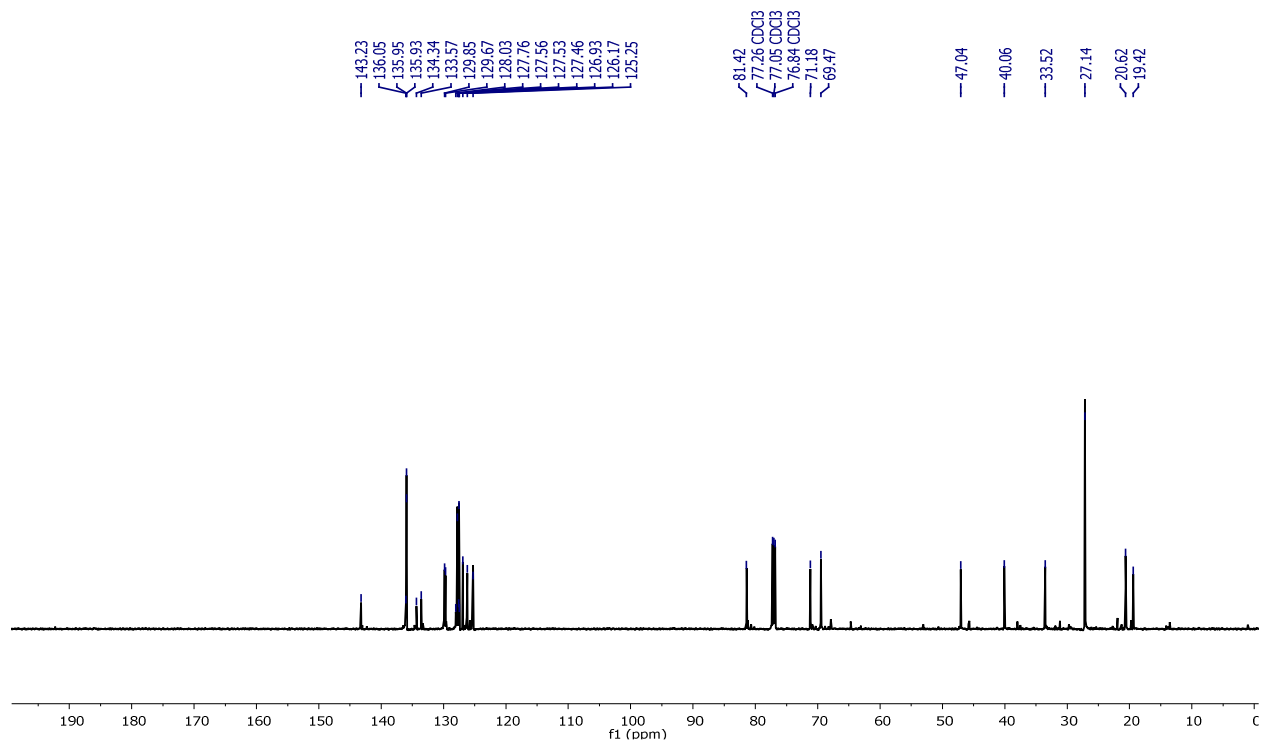

**DEPT-135 of compound (13c) (150 MHz,  $\text{CDCl}_3$ )**

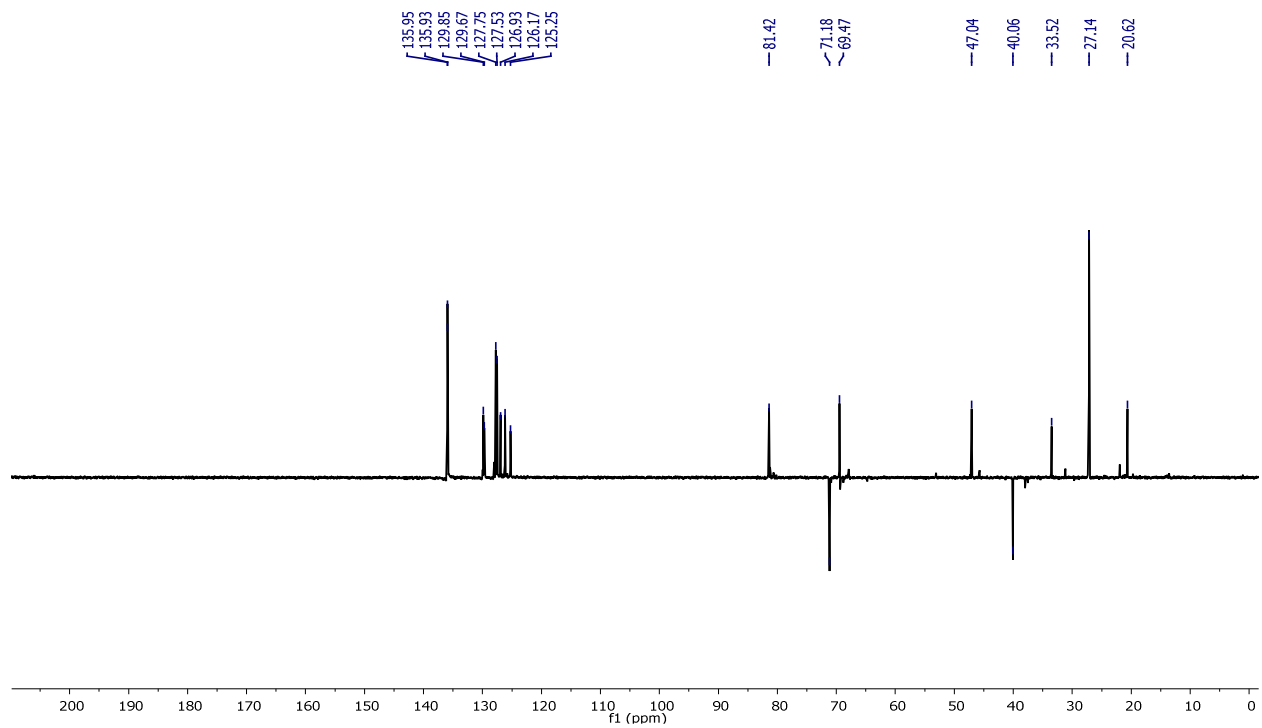



2D-NOESY spectrum of 9a (600 MHz, CDCl<sub>3</sub>)

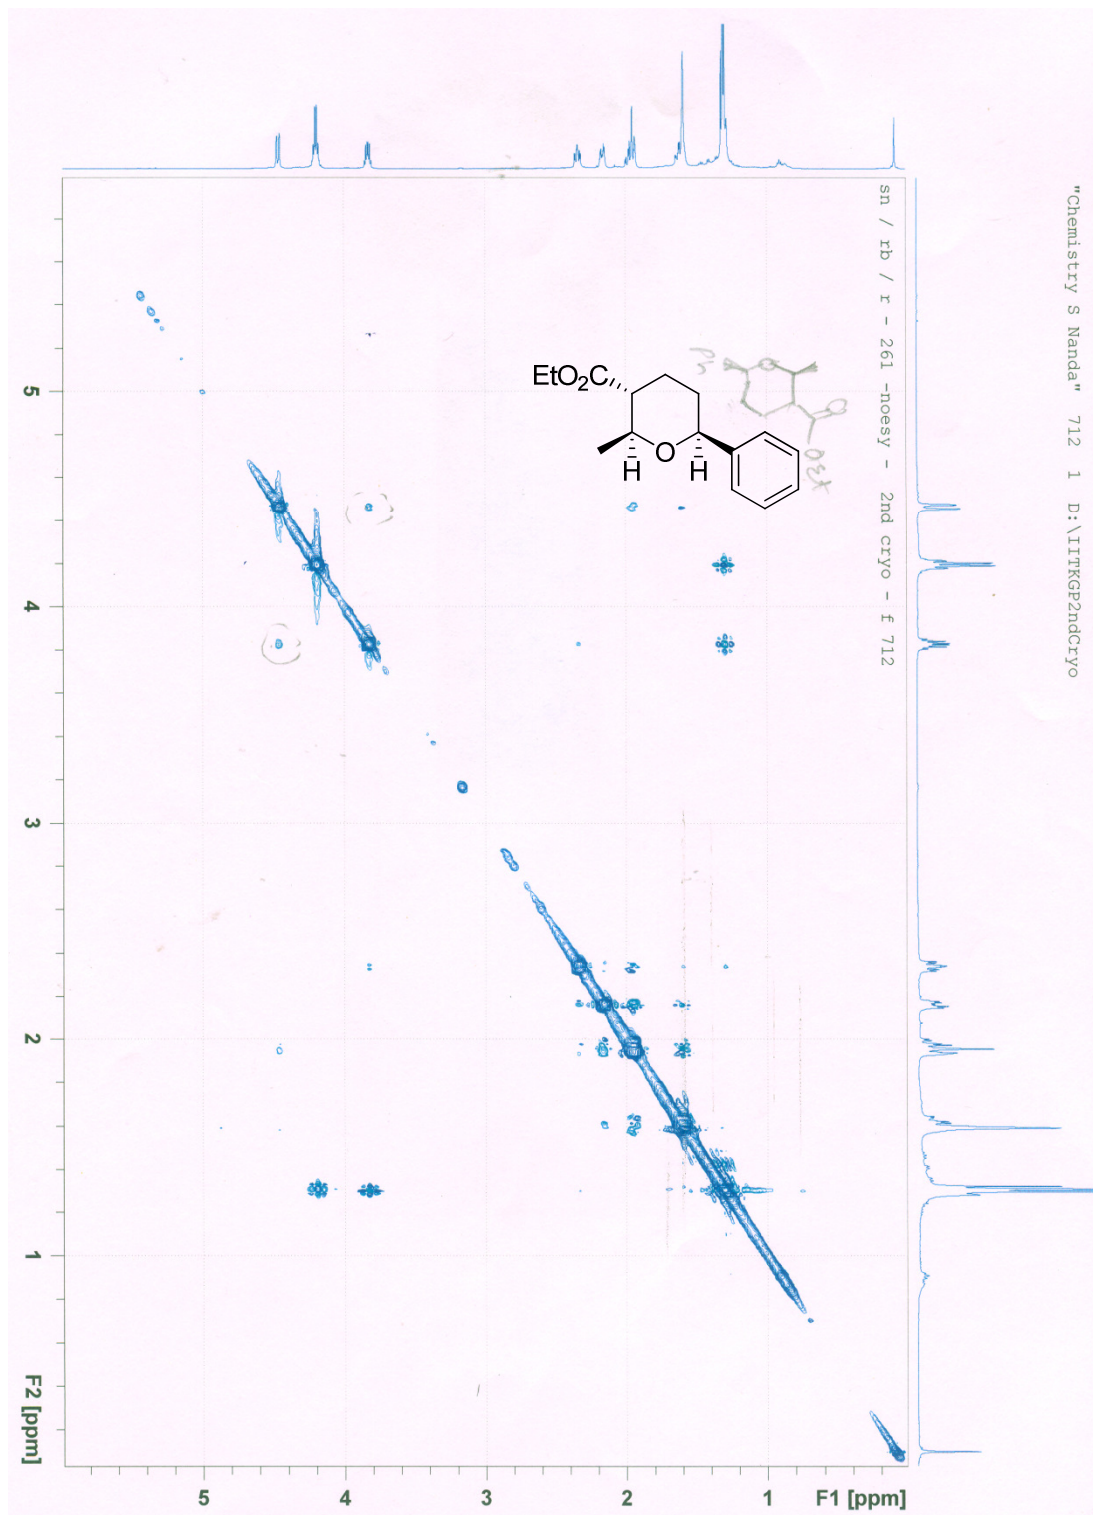

2D-NOESY spectrum of 9b (600 MHz, CDCl<sub>3</sub>)

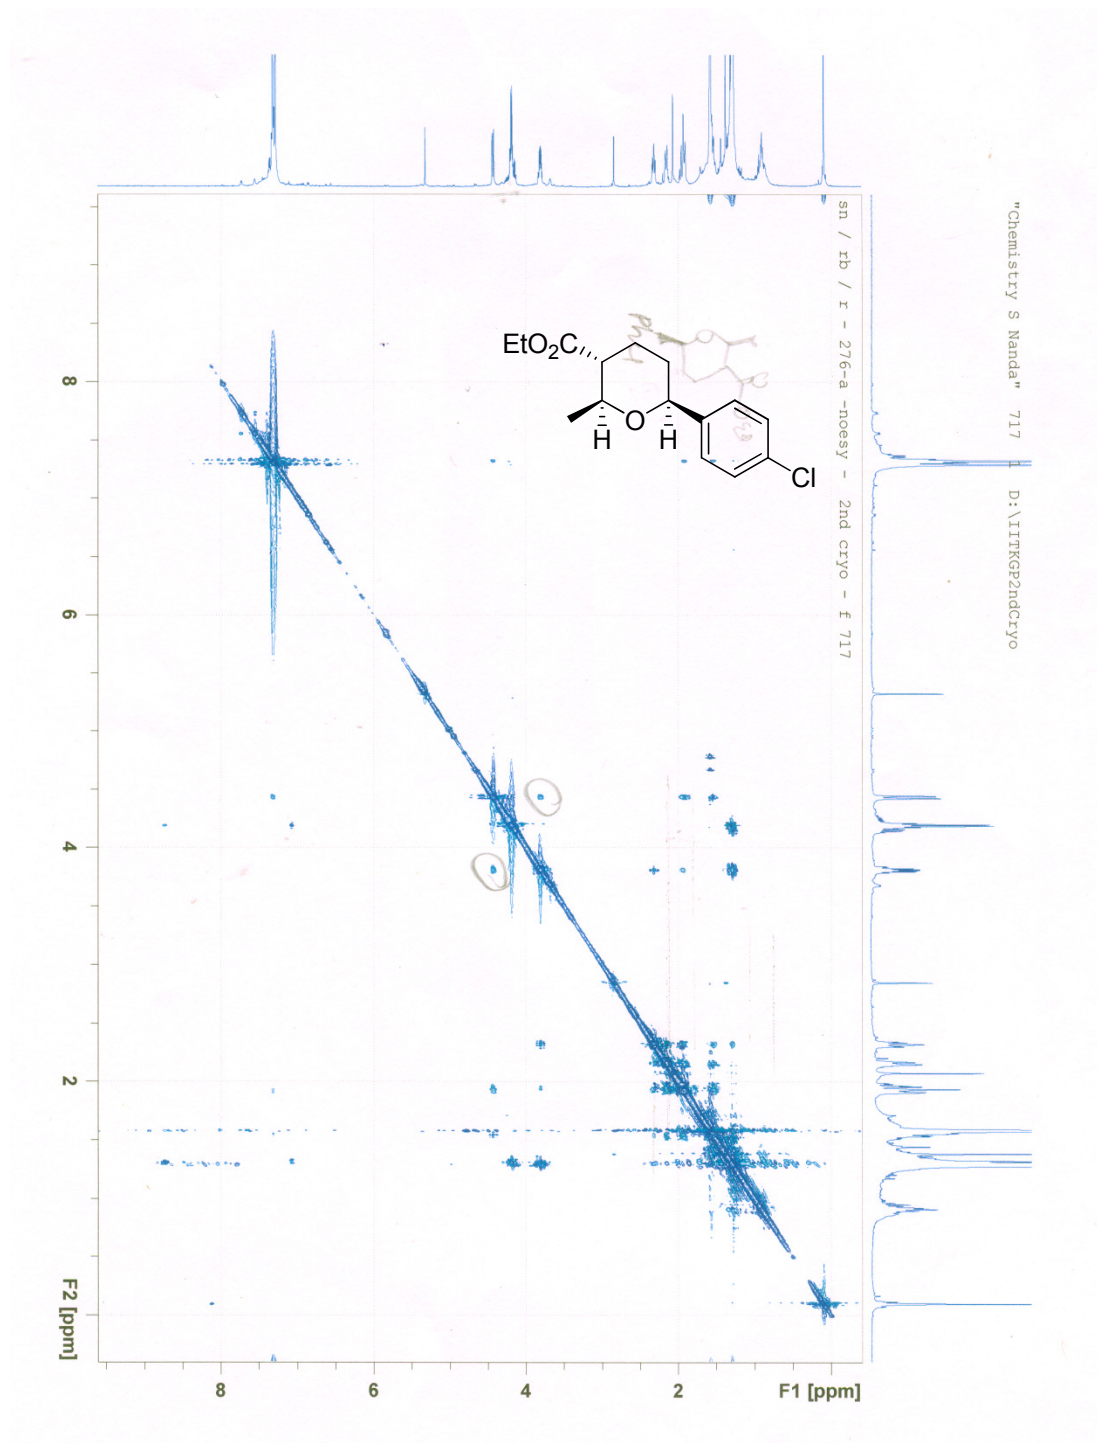

2D-NOESY spectrum of 9c (600 MHz, CDCl<sub>3</sub>)

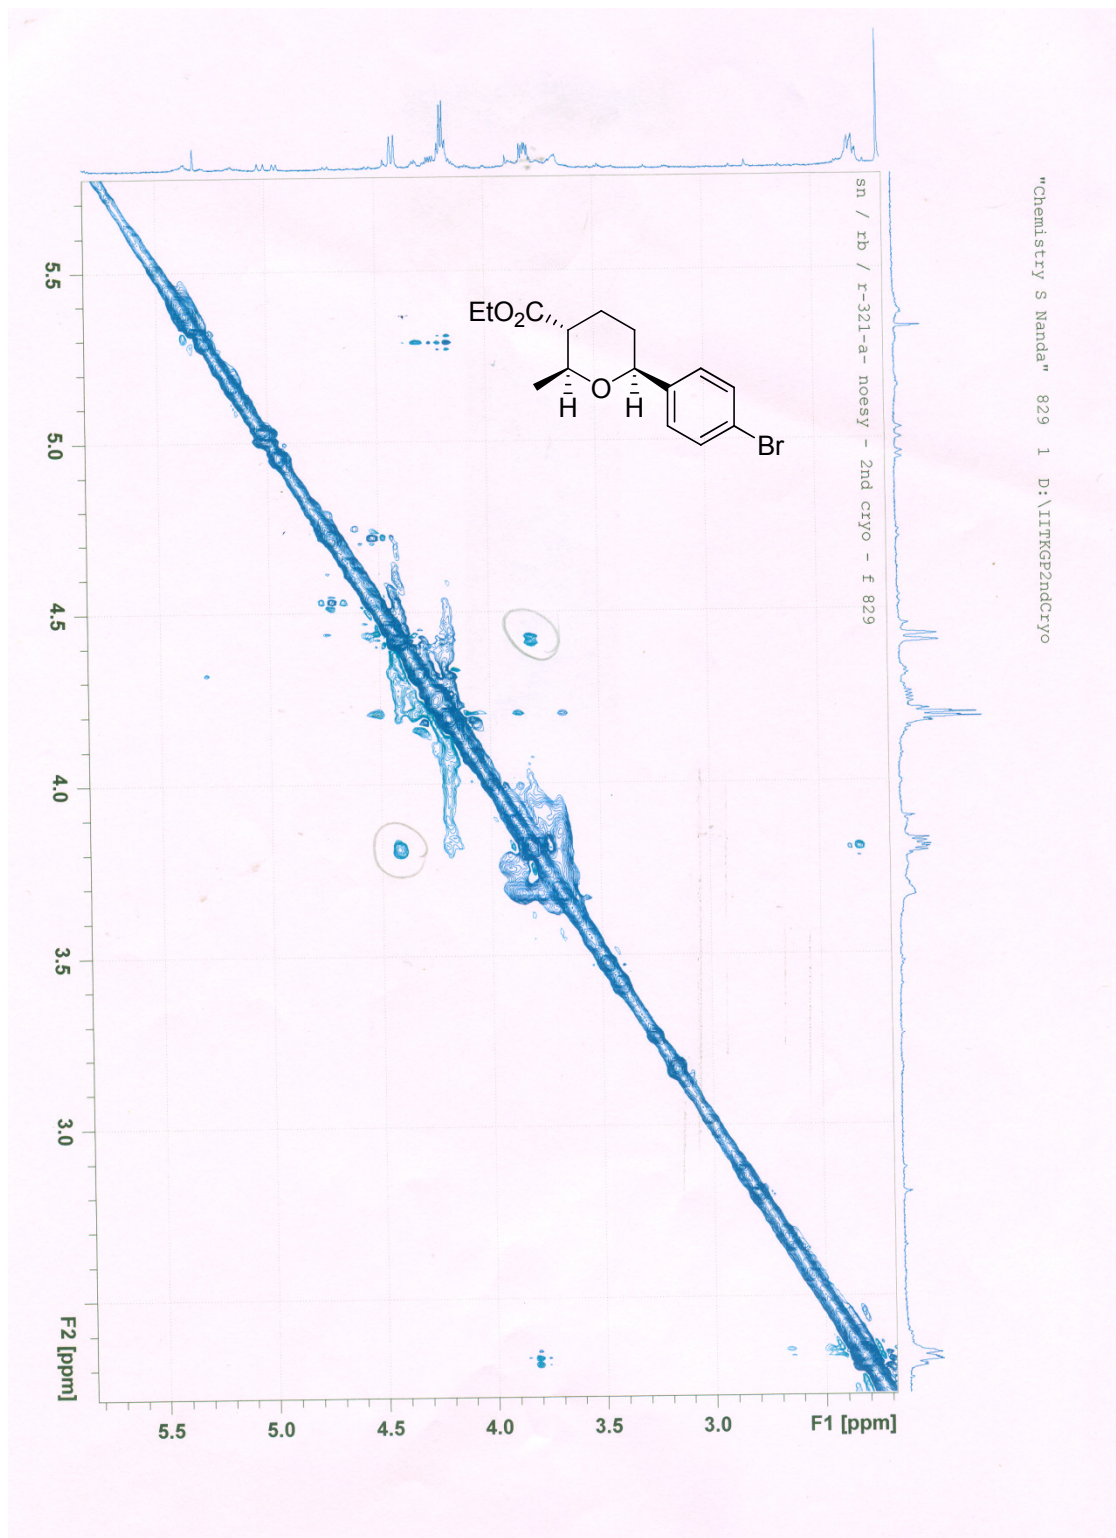

2D-NOESY spectrum of 9d (600 MHz, CDCl<sub>3</sub>)

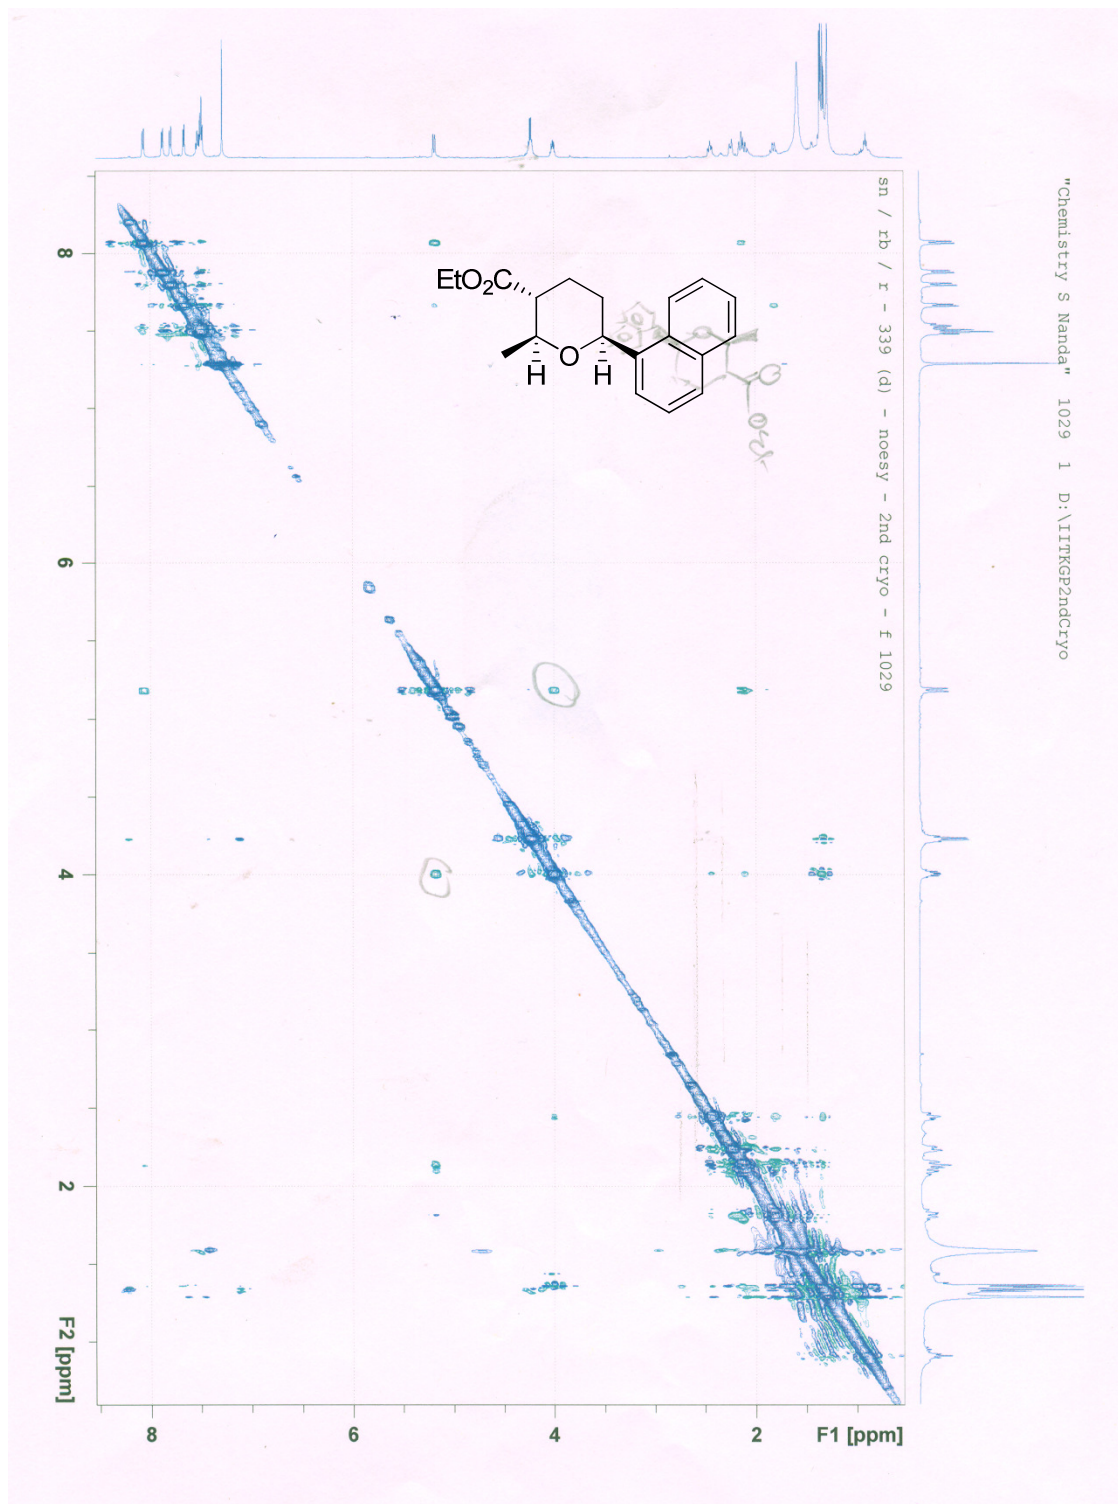

2D-NOESY spectrum of 9e (600 MHz, CDCl<sub>3</sub>)

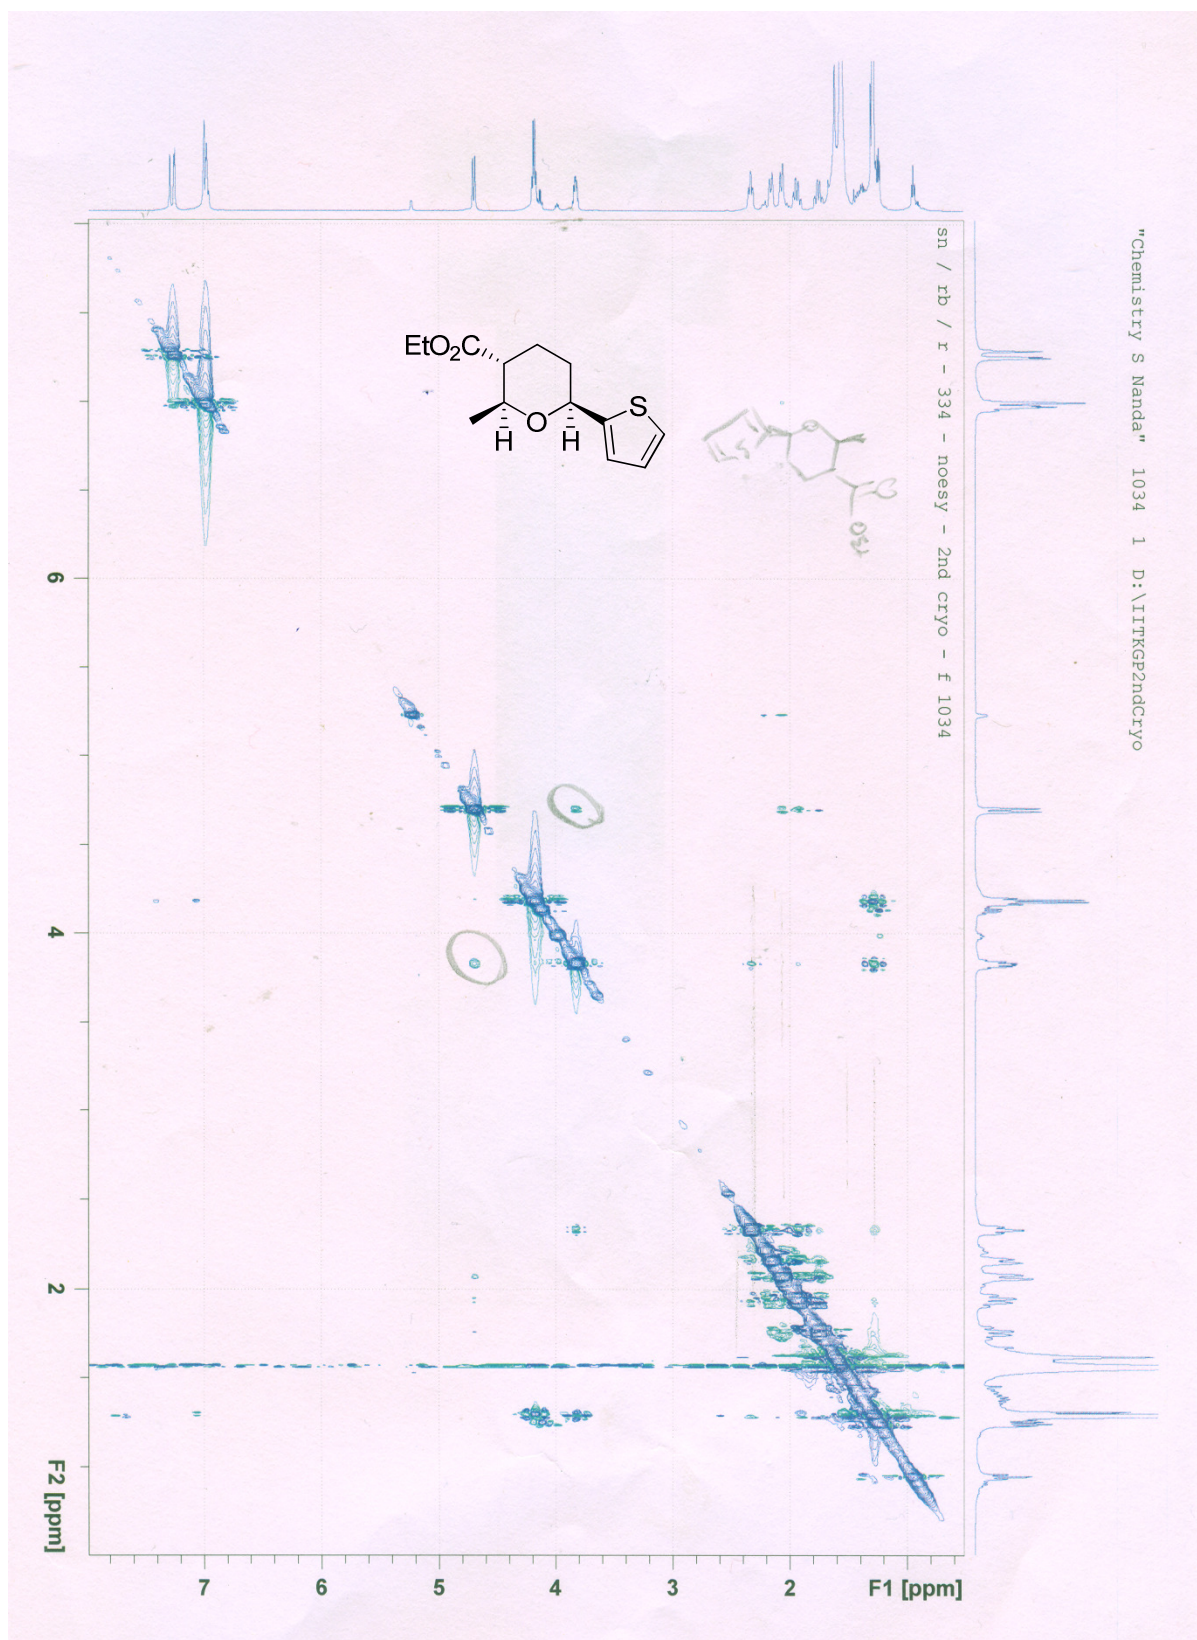

Sample name: Rashmita racemic 4-tolyl with NaBH<sub>4</sub>

Column: CHIRALPAK IC; Flow rate: 1.0 ml/min

Mobile phase: 98:2; hexane:IPA; Injection volume: 5 μL

Additional information: Manually integrated

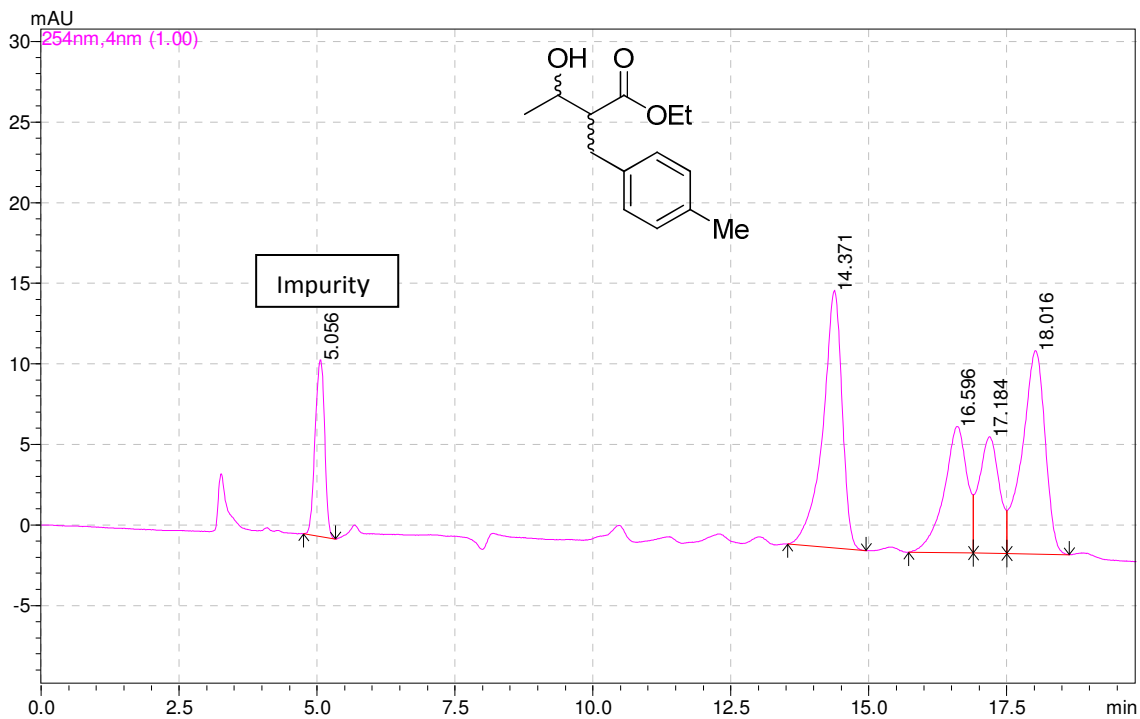

PDA Ch1 254nm 4nm

| Peak# | Ret time | Conc  | area   | Height | Area (%) |
|-------|----------|-------|--------|--------|----------|
| 1     | 5.056    | 10.10 | 131631 | 10943  | 10.1     |
| 2     | 14.371   | 29.86 | 388884 | 15956  | 29.86    |
| 3     | 16.596   | 16.68 | 230247 | 7853   | 16.68    |
| 4     | 17.184   | 15.25 | 185318 | 7237   | 15.25    |
| 5     | 18.016   | 28.11 | 366114 | 12635  | 28.11    |

Sample name: Rashmitabioreduction 4-tolyl with NBRC3319

Column: CHIRALPAK IC; Flow rate: 1.0 ml/min

Mobile phase: 98:2; hexane:IPA; Injection volume: 5µL

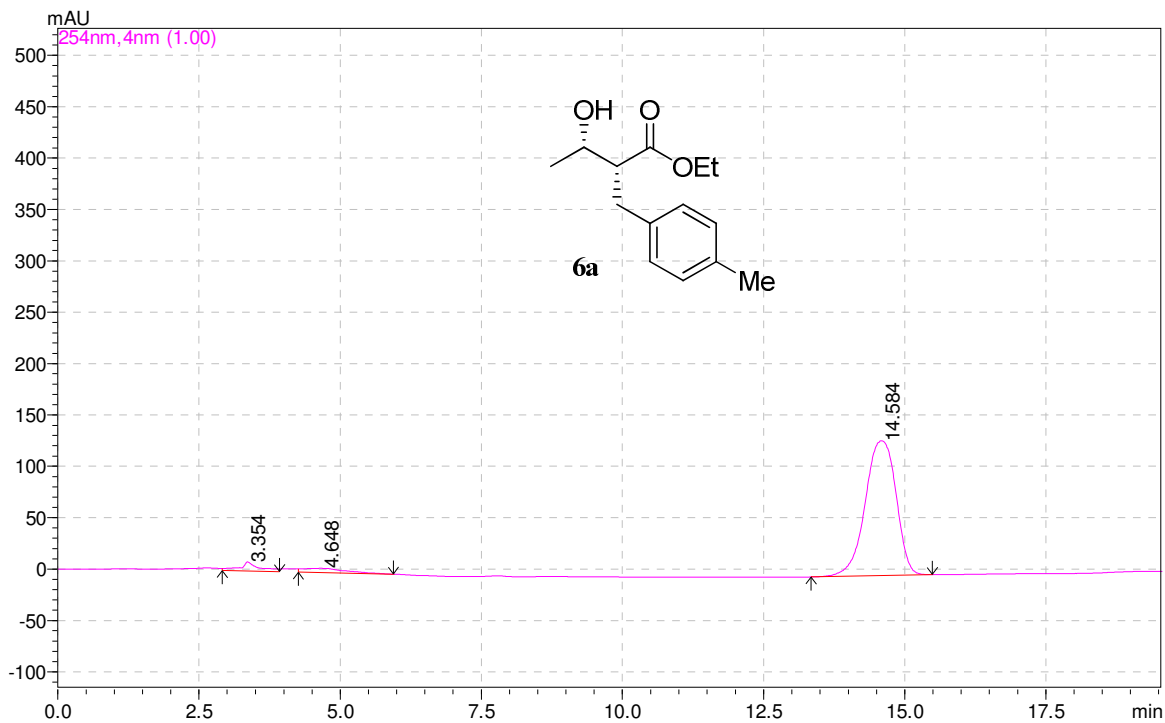

PDA Ch1 254nm 4nm

| Peak# | Ret time | Conc  | area    | Height | Area (%) |
|-------|----------|-------|---------|--------|----------|
| 1     | 3.354    | 3.91  | 212675  | 8650   | 3.91     |
| 2     | 4.648    | 3.97  | 215802  | 4239   | 3.98     |
| 3     | 14.584   | 92.11 | 5003250 | 131182 | 92.11    |

Sample name: Rashmita 4-bromobenzyl with NaBH<sub>4</sub>

Column: CHIRALPAK IC; Flow rate: 0.8 ml/min

Mobile phase: 99:1; hexane:IPA; Injection volume: 5μL

Additional information: Manually integrated

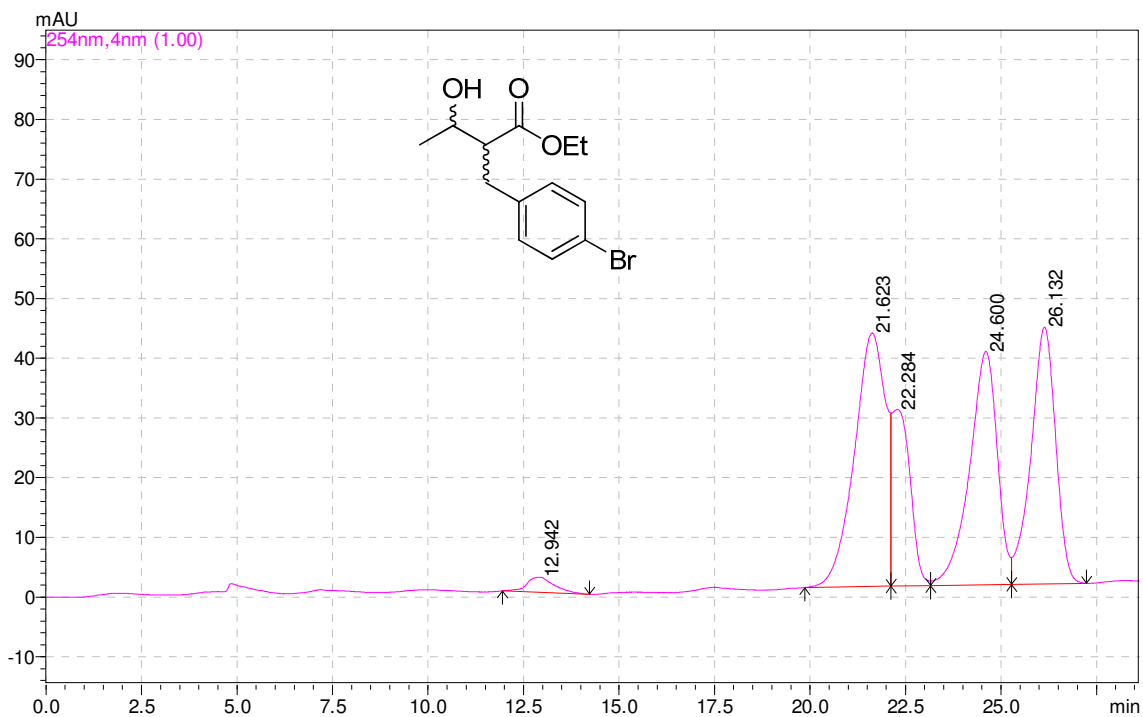

PDA Ch1 254nm 4nm

| Peak# | Ret time | Conc  | area    | Height | Area (%) |
|-------|----------|-------|---------|--------|----------|
| 1     | 12.942   | 1.53  | 126526  | 2551   | 1.53     |
| 2     | 21.623   | 32.25 | 2435674 | 42462  | 32.25    |
| 3     | 22.284   | 13.10 | 977384  | 29586  | 13.1     |
| 4     | 24.600   | 26.58 | 1981800 | 39082  | 26.58    |
| 5     | 26.132   | 26.54 | 1933953 | 42992  | 25.94    |



Sample name: Rashmita 4-bromobenzyl bio-reduction with NBRC 3319

Column: CHIRALPAK IC; Flow rate: 0.8 ml/min

Mobile phase: 99:1; hexane:IPA; Injection volume: 5 $\mu$ L

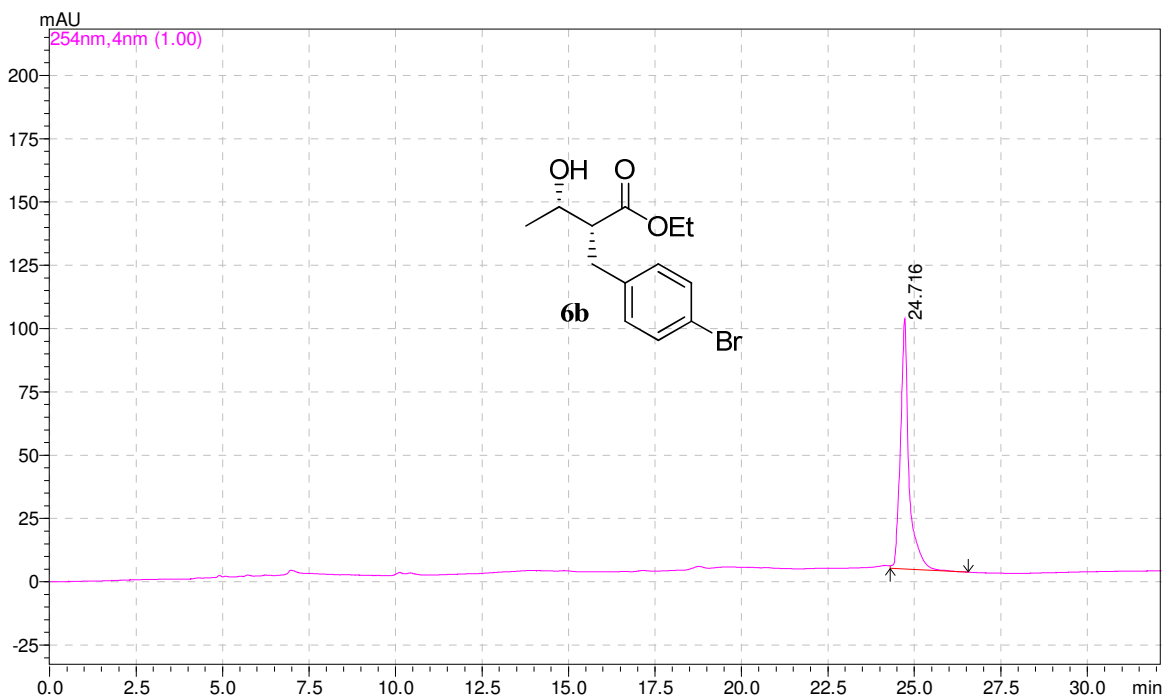

PDA Ch1 254nm 4nm

| Peak# | Ret time | Conc   | area    | Height | Area (%) |
|-------|----------|--------|---------|--------|----------|
| 1     | 24.716   | 100.00 | 1693663 | 98877  | 100      |

Sample name: Rashmita 4-Cl benzyl with NaBH<sub>4</sub>

Column: CHIRALPAK IA; Flow rate: 1.0 ml/min

Mobile phase: 90:10; hexane:IPA; Injection volume: 5μL

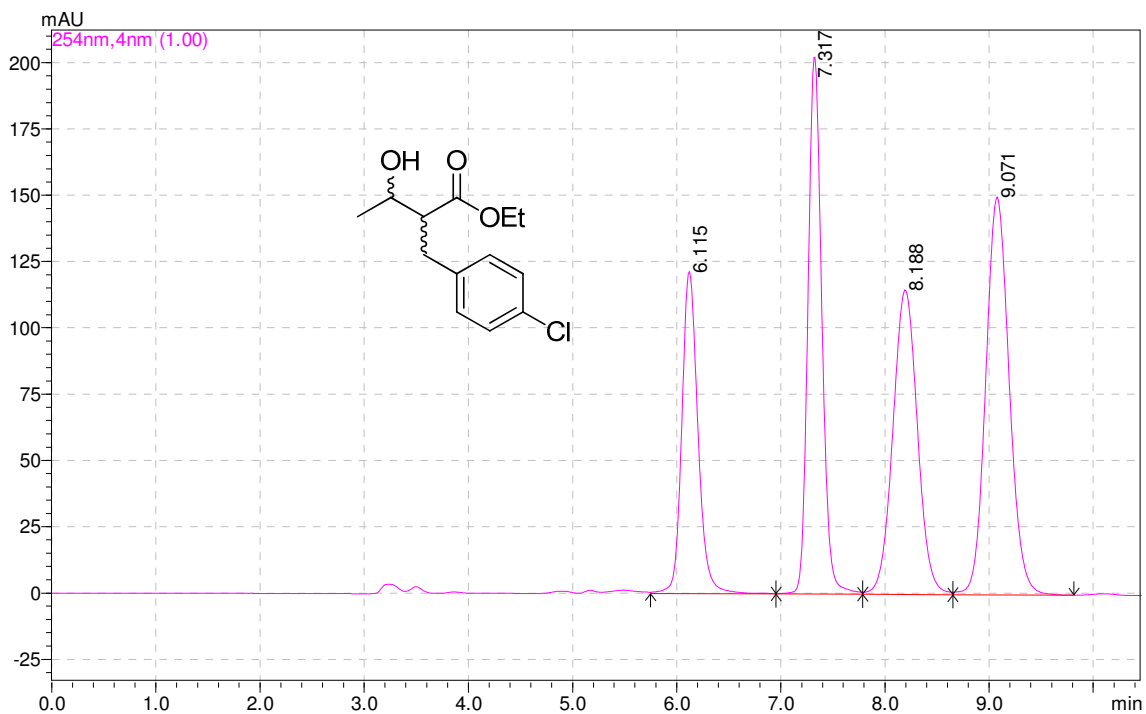

PDA Ch1 254nm 4nm

| Peak# | Ret time | Conc  | area    | Height | Area (%) |
|-------|----------|-------|---------|--------|----------|
| 1     | 6.115    | 22.73 | 1312258 | 121586 | 22.73    |
| 2     | 7.317    | 27.28 | 1870850 | 202499 | 27.28    |
| 3     | 8.188    | 22.33 | 1874582 | 114803 | 22.33    |
| 4     | 9.071    | 27.66 | 2341010 | 149913 | 27.66    |

Sample name: Rashmita 4-Cl benzyl with NBRC3319

Column: CHIRALPAK IA; Flow rate: 1.0 ml/min

Mobile phase: 90:10; hexane:IPA; Injection volume: 10 $\mu$ L

PDA Ch1 254nm 4nm

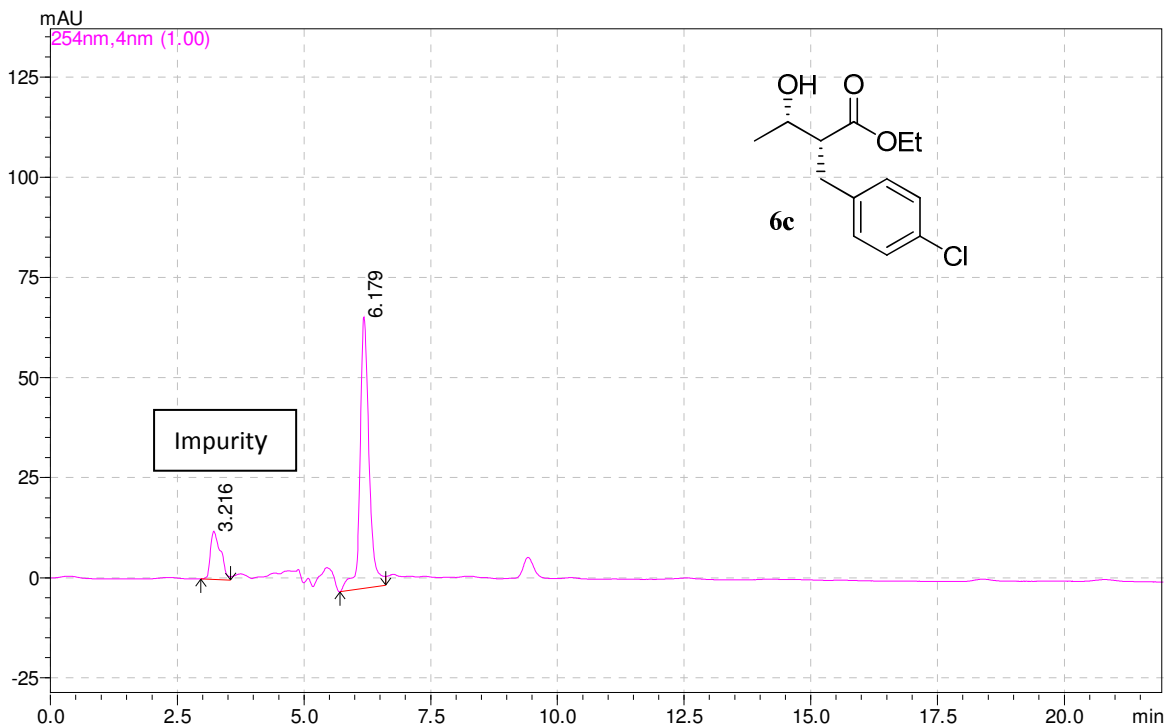

| Peak# | Ret time | Conc     | area    | Height | Area (%) |
|-------|----------|----------|---------|--------|----------|
| 1     | 3.218    | 16.76513 | 252484  | 15872  | 16.76    |
| 2     | 6.179    | 83.23487 | 1263001 | 79379  | 83.24    |

Sample name: Rashmita 4-nitrobenzyl with NaBH<sub>4</sub>

Column: CHIRALPAK IC; Flow rate: 1.0 ml/min

Mobile phase: 98:2; hexane:IPA; Injection volume: 5μL

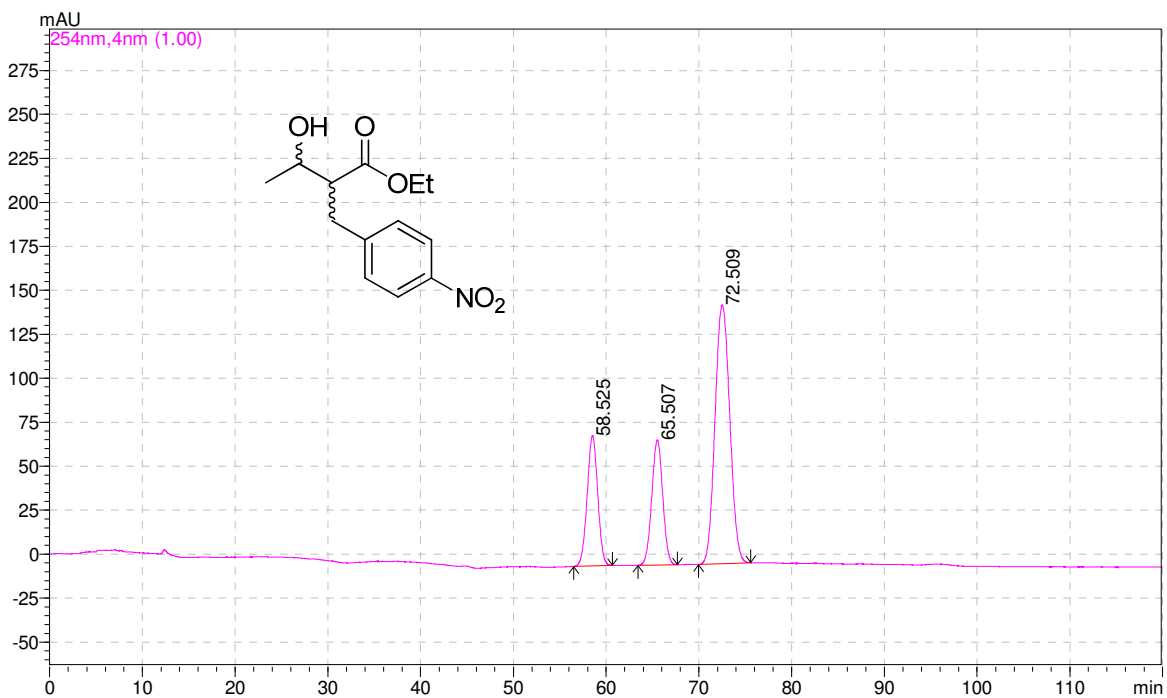

PDA Ch1 254nm 4nm

| Peak# | Ret time | Conc    | area     | Height | Area (%) |
|-------|----------|---------|----------|--------|----------|
| 1     | 58.525   | 20.9498 | 5869241  | 74306  | 20.94    |
| 2     | 65.507   | 20.8751 | 5848298  | 71078  | 20.87    |
| 3     | 72.509   | 58.175  | 16298109 | 147078 | 58.17    |

The peak at 72.509 corresponds to two stereoisomers, and we are unable to separate it (Chiral pak IA, IB, IC, OD, OB, OJ, AD, AS and Lux cellulose-1, cellulose-2, cellulose-3, cellulose-4, amylose-1 was used as a stationary phase).

Sample name: Rashmita 4-nitrobenzyl with NBRC 3319

Column: CHIRALPAK IC; Flow rate: 1.0 ml/min

Mobile phase: 98:2; hexane:IPA; Injection volume: 10 $\mu$ L

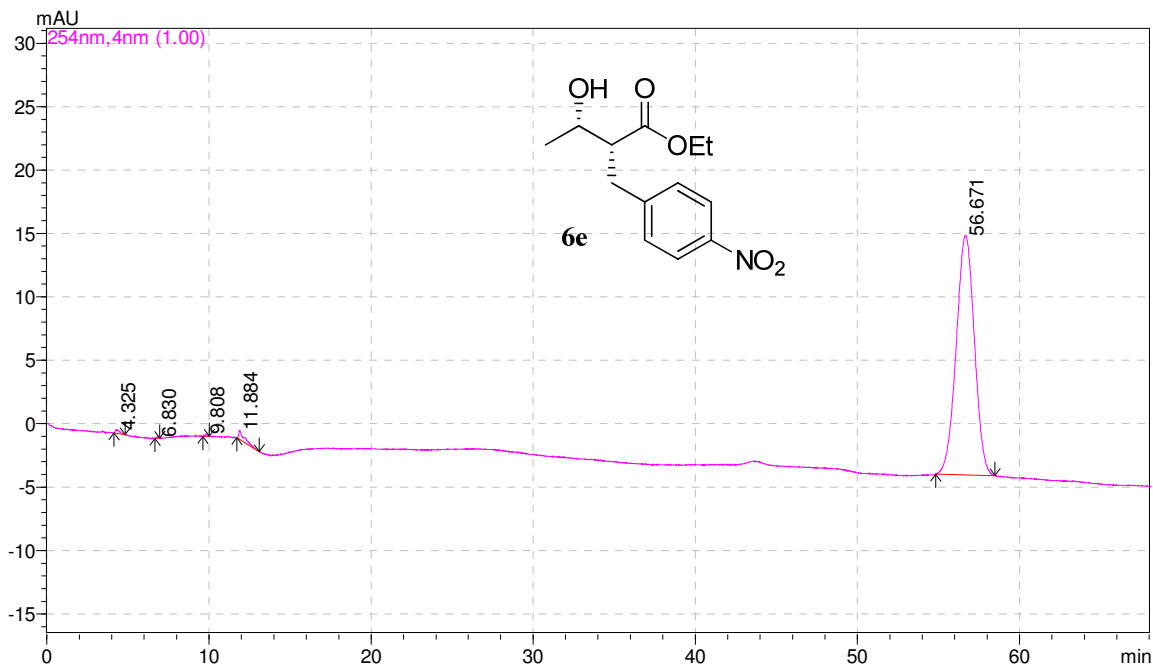

PDA Ch1 254nm 4nm

| Peak# | Ret time | Conc   | area    | Height | Area (%) |
|-------|----------|--------|---------|--------|----------|
| 1     | 4.325    | 0.1836 | 3806    | 244    | 0.18     |
| 2     | 6.83     | 0.1245 | 526379  | 6592   | .12      |
| 3     | 9.80     | 0.1038 | 2152    | 203    | 0.1      |
| 4     | 11.884   | 2.1532 | 3176    | 394    | 2.15     |
| 5     | 56.671   | 97.435 | 1537432 | 19023  | 97.43    |

Sample name: Rashmita 3-nitrobenzyl with NaBH<sub>4</sub>

Column: CHIRALPAK IC; Flow rate: 1.0 ml/min

Mobile phase: 90:10; hexane:IPA; Injection volume: 5μL

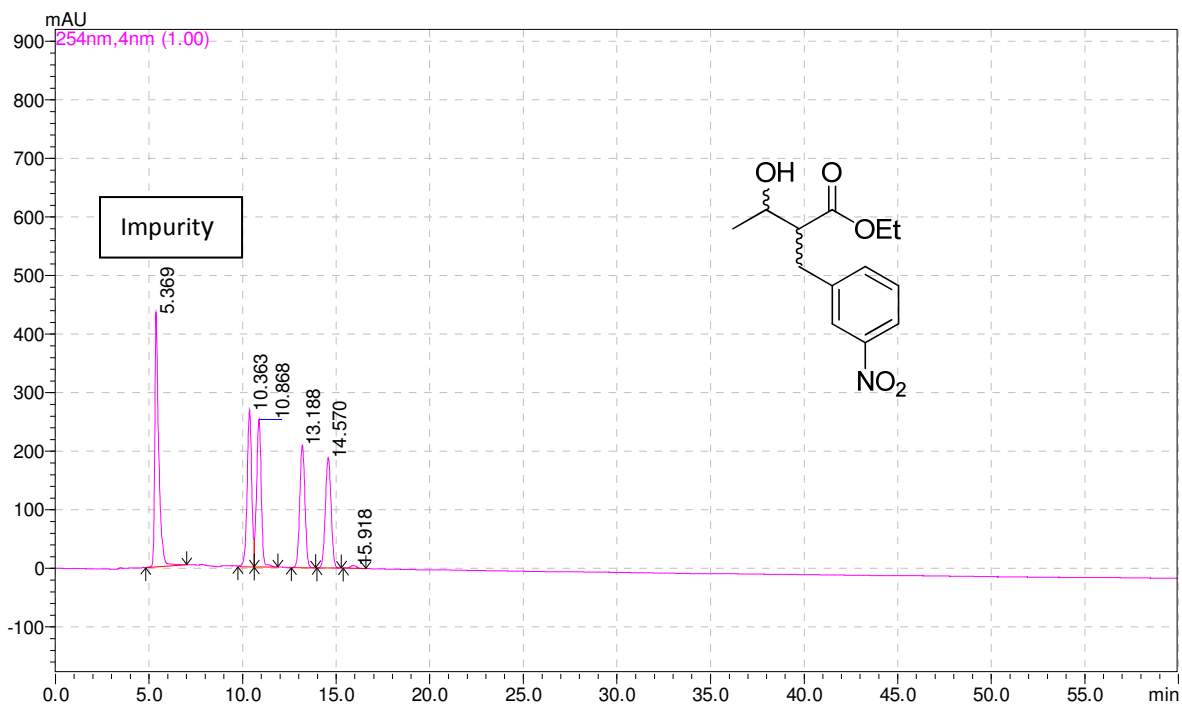

PDA Ch1 254nm 4nm

| Peak# | Ret time | Conc  | area    | Height | Area (%) |
|-------|----------|-------|---------|--------|----------|
| 1     | 5.369    | 27.12 | 6329891 | 434488 | 27.12    |
| 2     | 10.363   | 19.30 | 4504012 | 268034 | 19.30    |
| 3     | 10.868   | 18.69 | 4362127 | 252076 | 18.69    |
| 4     | 13.188   | 17.24 | 4024332 | 209134 | 17.24    |
| 5     | 14.570   | 17.15 | 4003849 | 188678 | 17.15    |
| 6     | 15.918   | 0.50  | 112398  | 4563   | 0.50     |

Sample name: Rashmita 3-nitrobenzyl with NBRC3319

Column: CHIRALPAK IC; Flow rate: 1.0 ml/min

Mobile phase: 90:10; hexane:IPA; Injection volume: 10 $\mu$ L

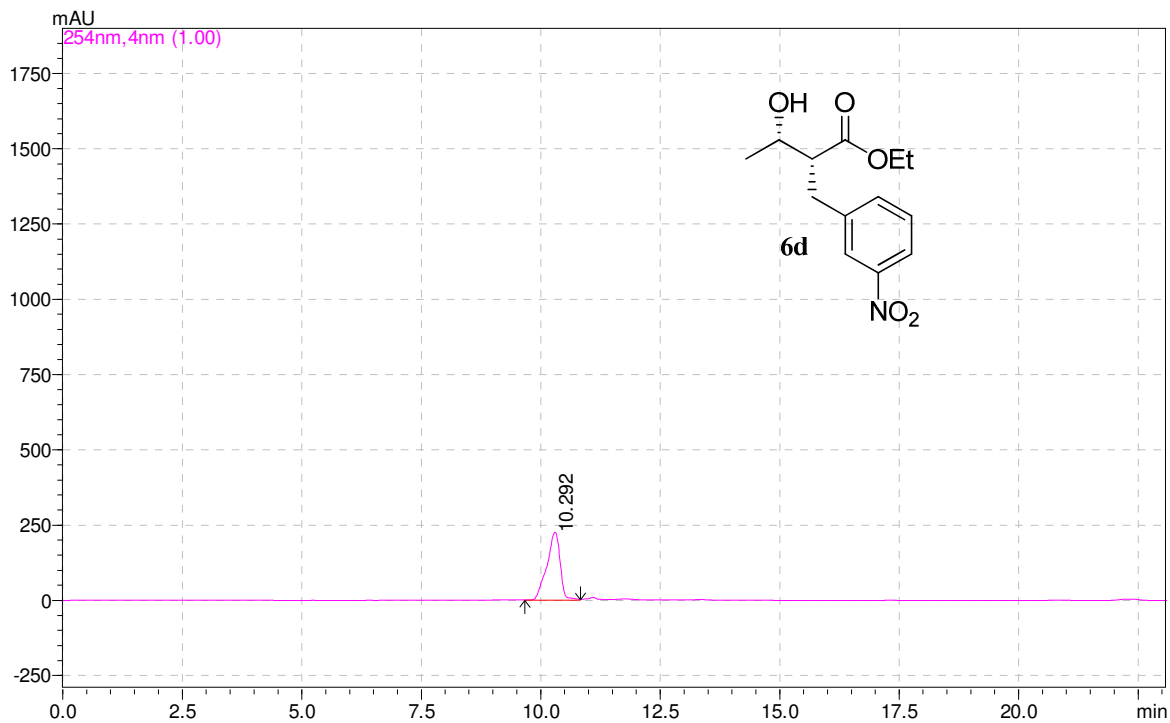

PDA Ch1 254nm 4nm

| Peak# | Ret time | Conc   | area   | Height | Area (%) |
|-------|----------|--------|--------|--------|----------|
| 1     | 10.292   | 100.00 | 519444 | 38347  | 100      |

Sample name: Rashmita 1-naphthyl with NaBH<sub>4</sub>

Column: CHIRALPAK IC; Flow rate: 1.0 ml/min

Mobile phase: 90:10; hexane:IPA; Injection volume: 5 μL

Additional information: Manually integrated

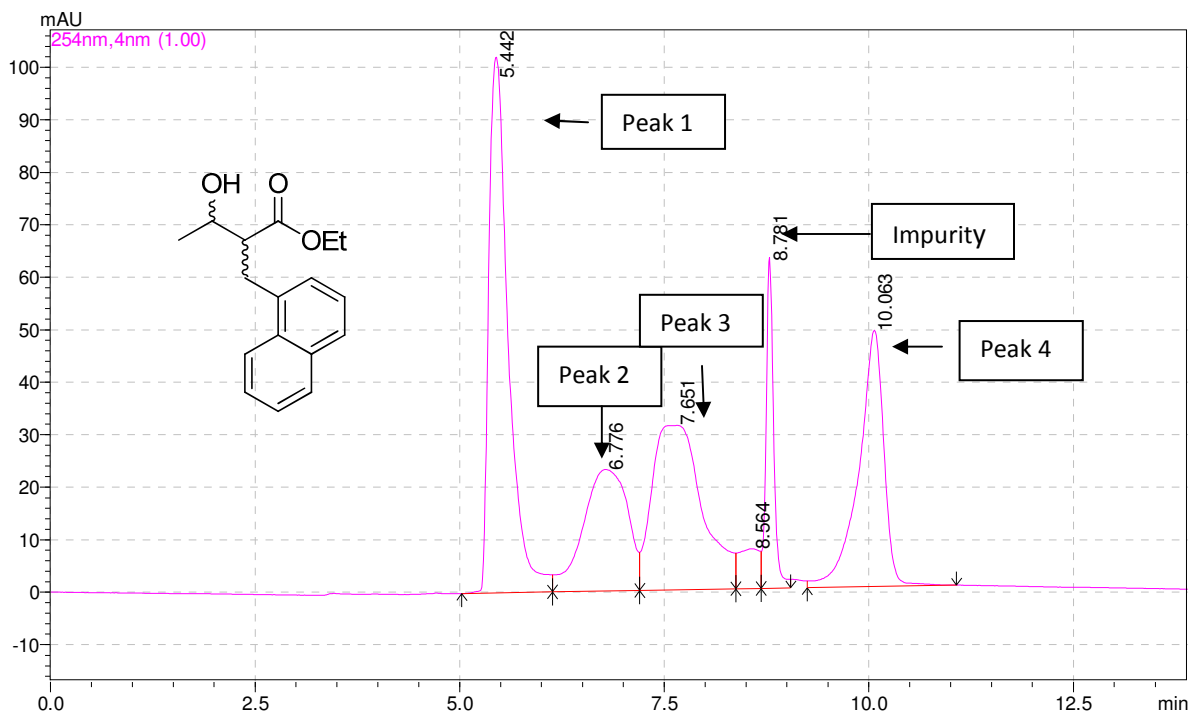

PDA Ch1 254nm 4nm

| Peak# | Ret time | Conc  | area    | Height | Area (%) |
|-------|----------|-------|---------|--------|----------|
| 1     | 5.442    | 26.74 | 1689678 | 102055 | 28.74    |
| 2     | 6.776    | 19.04 | 881786  | 23186  | 19.04    |
| 3     | 7.651    | 26.88 | 1344230 | 31344  | 26.88    |
| 4     | 8.564    | 2.05  | 134847  | 7555   | 2.05     |
| 5     | 8.781    | 6.26  | 399108  | 63067  | 6.26     |
| 6     | 10.063   | 19.03 | 1046378 | 48814  | 19.03    |



Sample name: Rashmita 1-naphthyl with NBRC3319

Column: CHIRALPAK IC; Flow rate: 1.0 ml/min

Mobile phase: 90:10; hexane:IPA; Injection volume: 5 $\mu$ L

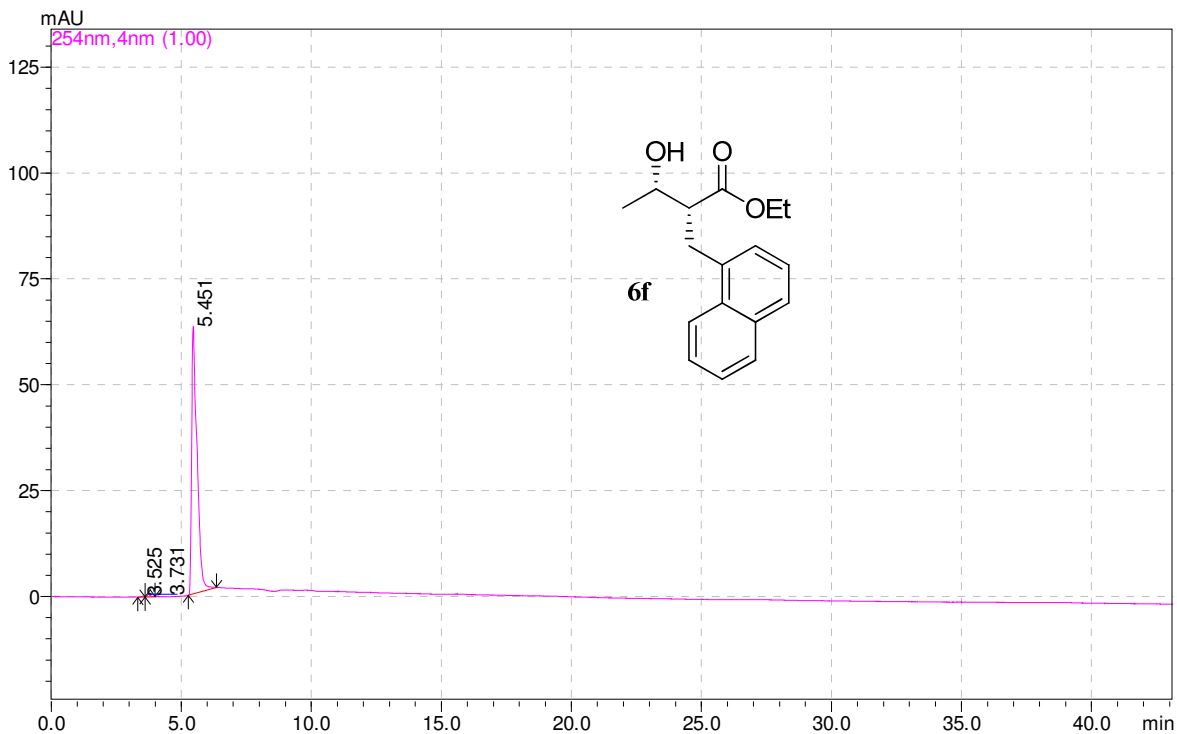

PDA Ch1 254nm 4nm

| Peak# | Ret time | Conc     | area   | Height | Area (%) |
|-------|----------|----------|--------|--------|----------|
| 1     | 3.525    | 0.20562  | 1914   | 221    | 0.2056   |
| 2     | 3.731    | 0.58544  | 5450   | 592    | 0.5854   |
| 3     | 5.451    | 99.20894 | 923552 | 63098  | 99.2089  |

Sample name: Rashmita 2-naphthyl with NaBH<sub>4</sub>

Column: CHIRALCEL OD-H; Flow rate: 0.8 ml/min

Mobile phase: 98:2; hexane:IPA; Injection volume: 5μL

Additional information: Manually integrated

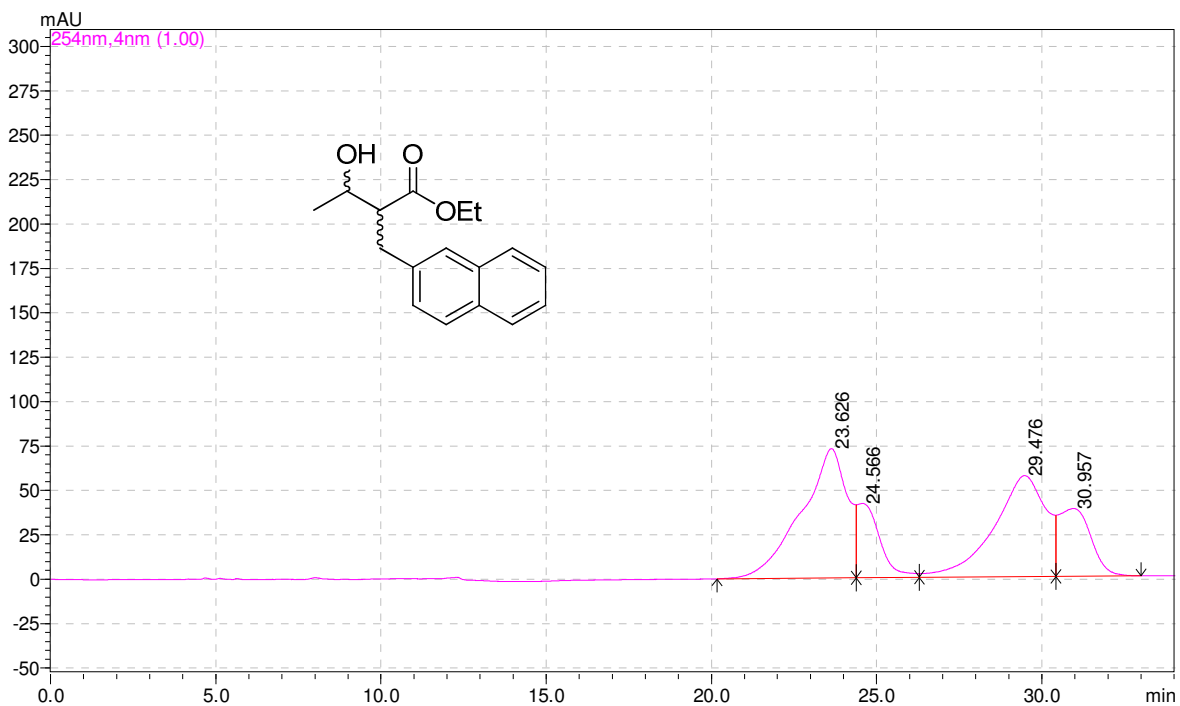

PDA Ch1 254nm 4nm

| Peak# | Ret time | Conc  | area    | Height | Area (%) |
|-------|----------|-------|---------|--------|----------|
| 1     | 23.626   | 37.49 | 7060234 | 72863  | 37.49    |
| 2     | 24.566   | 12.16 | 1997034 | 41760  | 12.16    |
| 3     | 29.476   | 35.87 | 6236982 | 56924  | 35.87    |
| 4     | 30.957   | 14.48 | 2590327 | 38186  | 14.48    |

Sample name: Rashmita 2-naphthyl with NBRC3319

Column: CHIRALCEL OD-H; Flow rate: 0.8 ml/min

Mobile phase: 98:2; hexane:IPA; Injection volume: 5µL

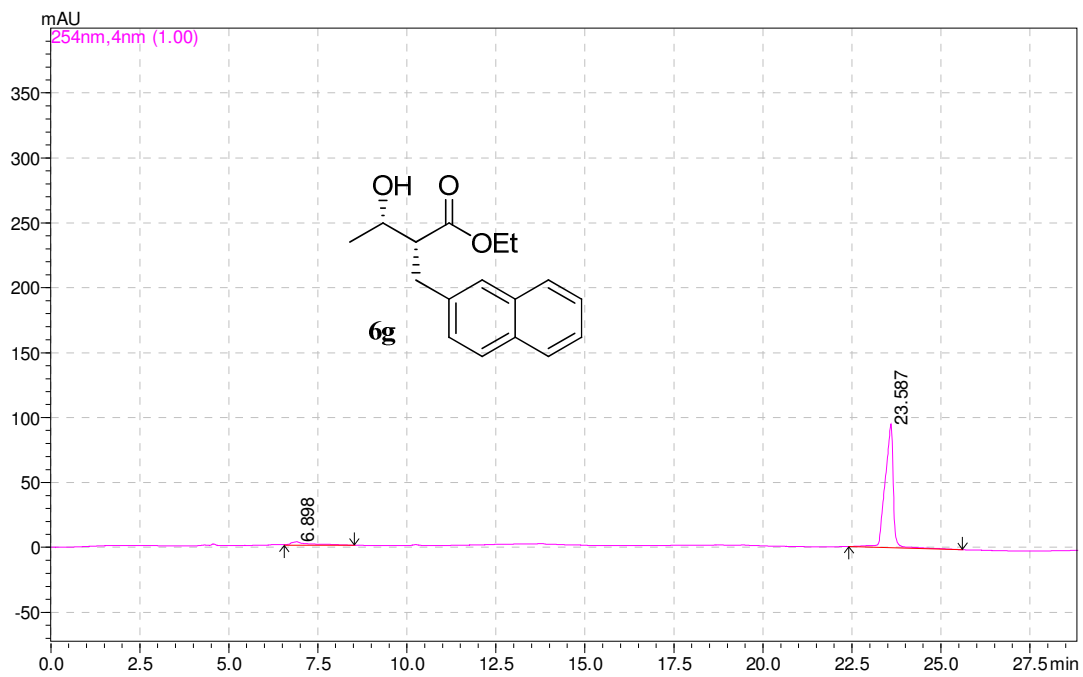

PDA Ch1 254nm 4nm

| Peak# | Ret time | Conc  | area    | Height | Area (%) |
|-------|----------|-------|---------|--------|----------|
| 1     | 6.898    | 6.20  | 101159  | 2647   | 6.20     |
| 2     | 23.587   | 93.80 | 1529949 | 95268  | 93.80    |

Sample name: Rashmita 2-thienyl benzyl with NaBH<sub>4</sub>

Column: CHIRALPAK IA; Flow rate: 1.0 ml/min

Mobile phase: 90:10; hexane:IPA; Injection volume: 5μL

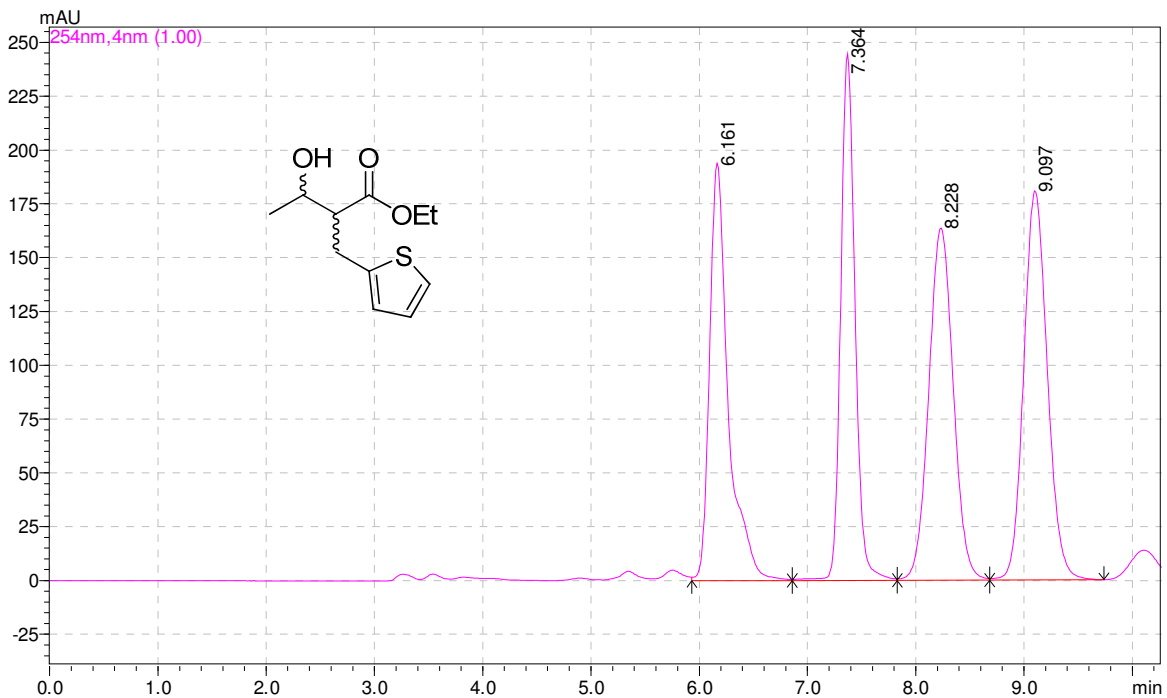

PDA Ch1 254nm 4nm

| Peak# | Ret time | Conc  | area    | Height | Area (%) |
|-------|----------|-------|---------|--------|----------|
| 1     | 6.161    | 23.48 | 2320215 | 193747 | 23.48    |
| 2     | 7.364    | 23.05 | 2247770 | 244608 | 23.05    |
| 3     | 8.228    | 26.33 | 2569260 | 163562 | 26.33    |
| 4     | 9.097    | 27.14 | 2740691 | 180652 | 27.14    |

Sample name: Rashmita 2-thienyl benzyl with NBRC3319

Column: CHIRALPAK IA; Flow rate: 1.0 ml/min

Mobile phase: 90:10; hexane:IPA; Injection volume: 5µL

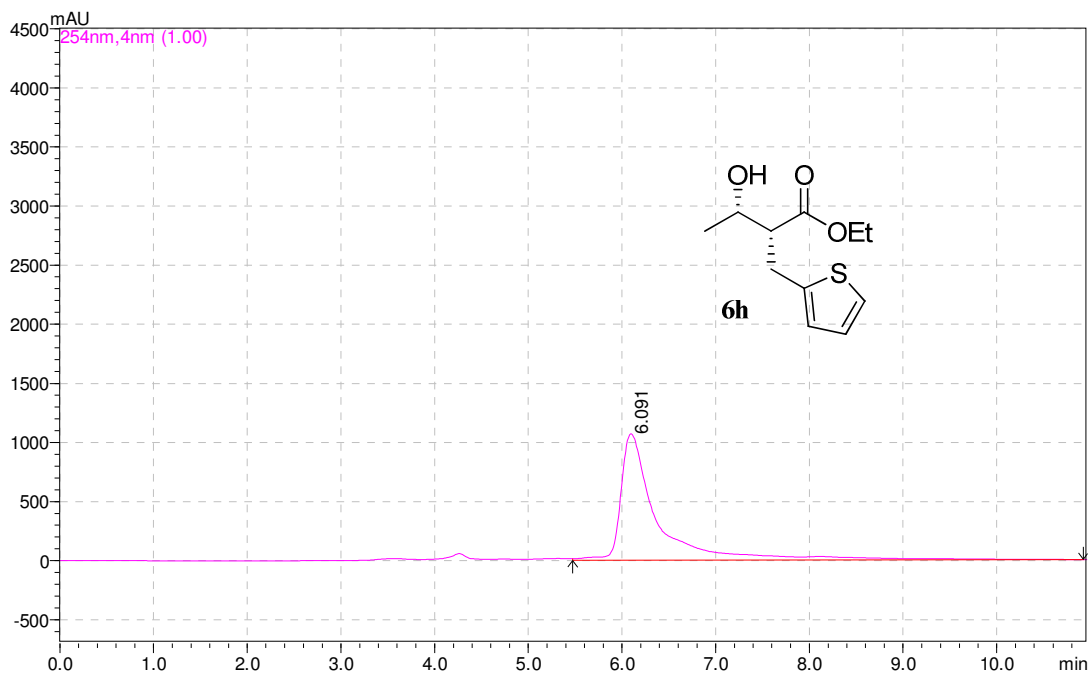

PDA Ch1 254nm 4nm

| Peak# | Ret time | Conc      | area     | Height  | Area (%) |
|-------|----------|-----------|----------|---------|----------|
| 1     | 6.091    | 100.00000 | 29274898 | 1069543 | 100      |

Sample name: Rashmitacinnamyl with NaBH<sub>4</sub>

Column: CHIRALCEL OD-H; Flow rate: 0.8 ml/min

Mobile phase: 98:2; hexane:IPA; Injection volume: 5μL

Additional information: Manually integrated

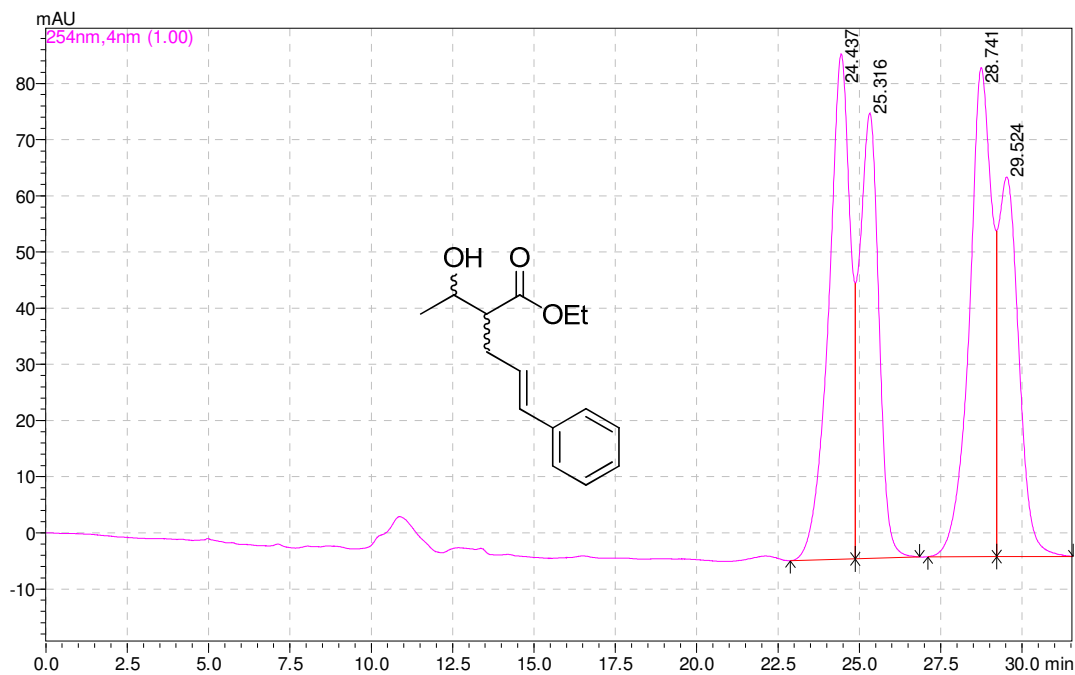

PDA Ch1 254nm 4nm

| Peak# | Ret time | Conc  | area    | Height | Area (%) |
|-------|----------|-------|---------|--------|----------|
| 1     | 24.437   | 28.63 | 4198134 | 89974  | 28.63    |
| 2     | 25.316   | 21.29 | 3267973 | 79247  | 21.29    |
| 3     | 28.741   | 28.92 | 4241355 | 87088  | 28.92    |
| 4     | 29.524   | 21.16 | 2953383 | 67620  | 21.16    |

Sample name: Rashmitacinnamyl with NBRC3319

Column: CHIRALCEL OD-H; Flow rate: 0.8 ml/min

Mobile phase: 98:2; hexane:IPA; Injection volume: 5 $\mu$ L

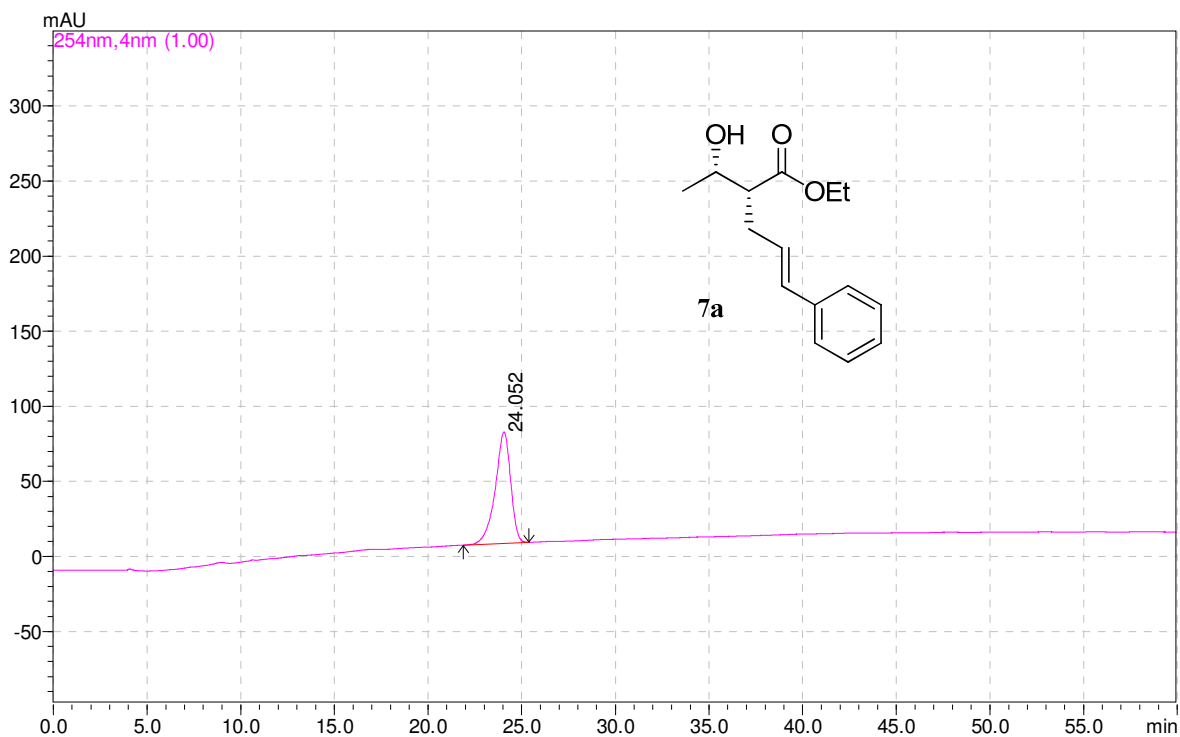

PDA Ch1 254nm 4nm

| Peak# | Ret time | Conc      | area    | Height | Area (%) |
|-------|----------|-----------|---------|--------|----------|
| 1     | 24.052   | 100.00000 | 4246210 | 74158  | 100      |

Sample name: Rashmita 4-Me-cinnamyl with NaBH<sub>4</sub>

Column: CHIRALPAK IA; Flow rate: 0.8 ml/min

Mobile phase: 98:2; hexane:IPA; Injection volume: 5μL

Additional information: Manually integrated

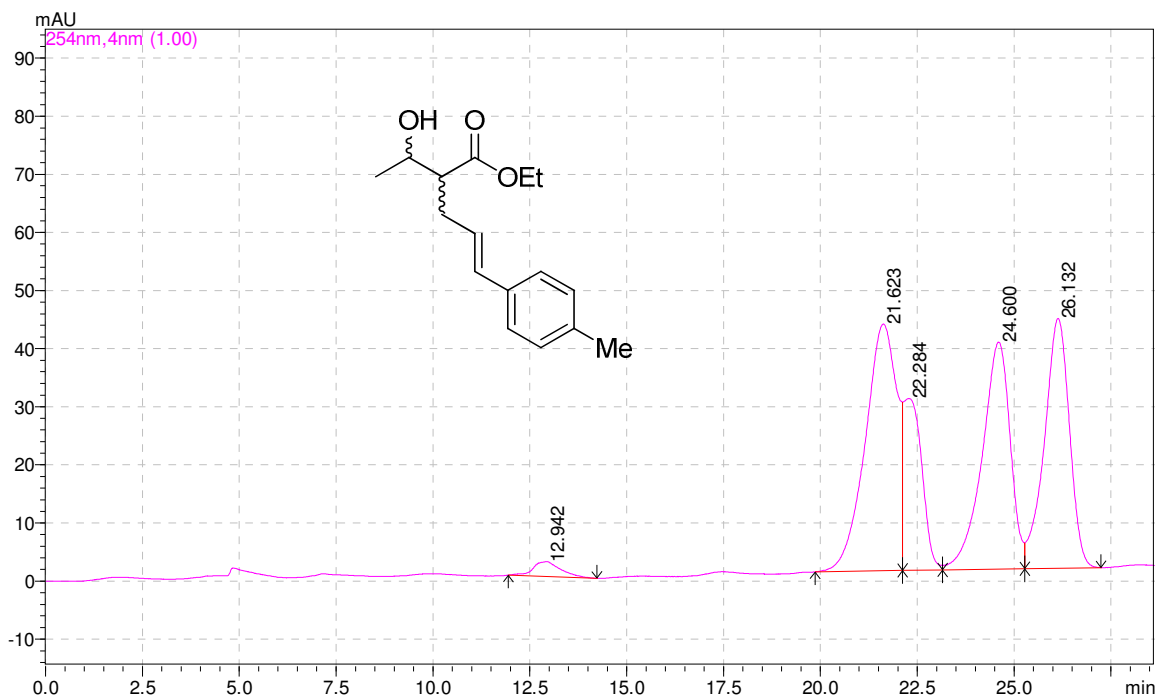

PDA Ch1 254nm 4nm

| Peak# | Ret time | Conc  | area    | Height | Area (%) |
|-------|----------|-------|---------|--------|----------|
| 1     | 12.942   | 1.69  | 126526  | 2551   | 1.69     |
| 2     | 21.623   | 31.87 | 2435674 | 42462  | 31.87    |
| 3     | 22.284   | 13.88 | 977384  | 29586  | 13.88    |
| 4     | 24.6     | 25.95 | 1981800 | 39082  | 25.95    |
| 5     | 26.132   | 26.61 | 1933953 | 42992  | 26.61    |



Sample name: Rashmita 4-Me-cinnamyl with NBRC3319

Column: CHIRALPAK IA; Flow rate: 0.8 ml/min

Mobile phase: 98:2; hexane:IPA; Injection volume: 5 $\mu$ L

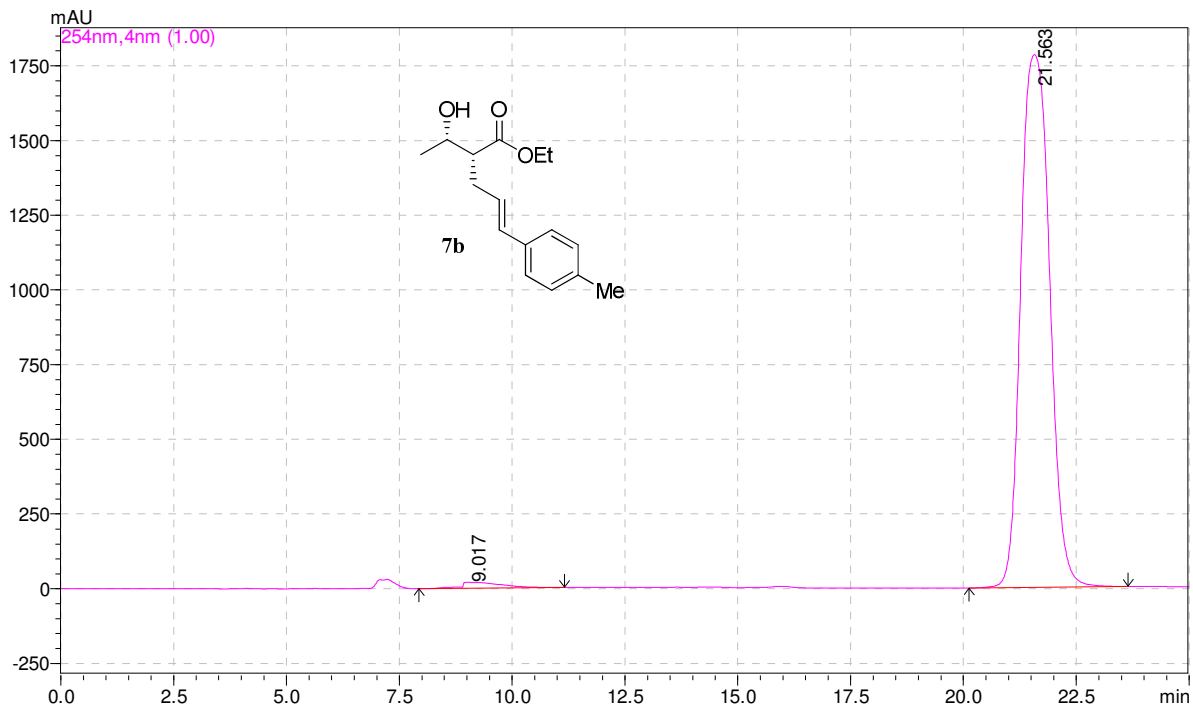

PDA Ch1 254nm 4nm

| Peak# | Ret time | Conc     | area     | Height   | Area (%) |
|-------|----------|----------|----------|----------|----------|
| 1     | 9.017    | 1.54191  | 1243162  | 20177    | 1.5      |
| 2     | 21.563   | 98.45809 | 79381747 | 79381747 | 98.5     |

Sample name: Rashmita 4-Br-cinnamyl with NaBH<sub>4</sub>

Column: CHIRALCEL OD-H; Flow rate: 1.0 ml/min

Mobile phase: 90:10; hexane:IPA; Injection volume: 5 $\mu$ L

Additional information: Manually integrated

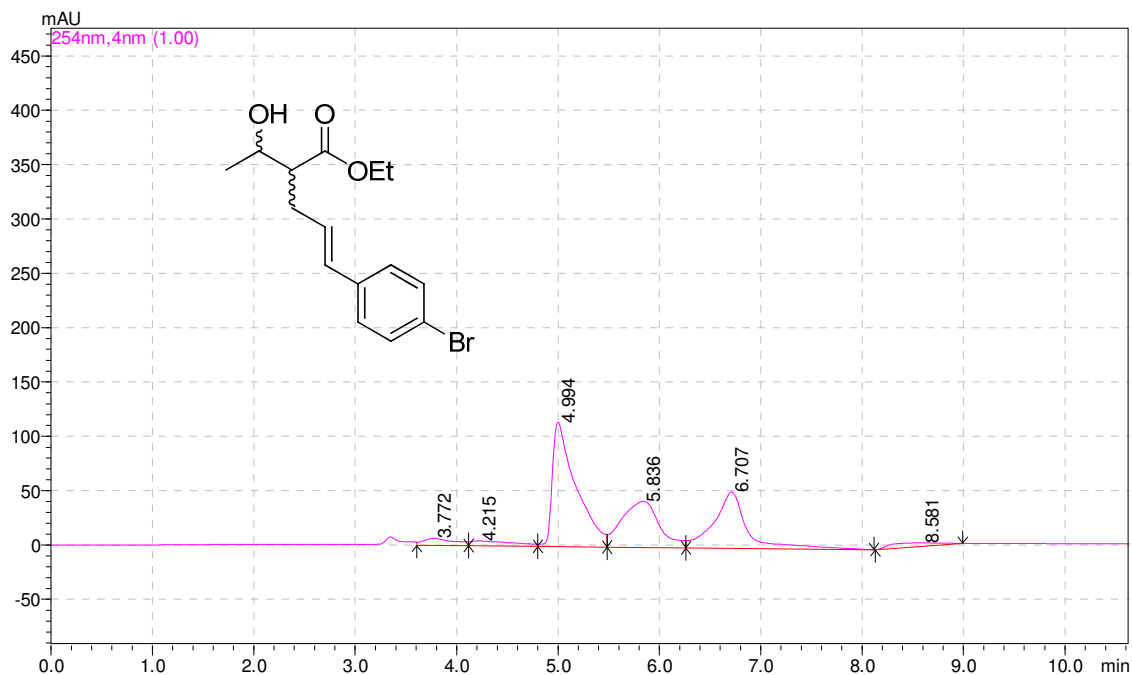

PDA Ch1 254nm 4nm

| Peak# | Ret time | Conc  | area    | Height | Area (%) |
|-------|----------|-------|---------|--------|----------|
| 1     | 3.772    | 2.04  | 137056  | 6566   | 2.04     |
| 2     | 4.215    | 1.98  | 134457  | 4589   | 1.98     |
| 3     | 4.994    | 44.11 | 1851594 | 114323 | 44.11    |
| 4     | 5.836    | 24.99 | 1088009 | 42381  | 24.99    |
| 5     | 6.707    | 25.00 | 117093  | 51745  | 25.00    |
| 6     | 8.581    | 1.88  | 121006  | 3108   | 1.88     |

The peak at 4.994 corresponds to two stereoisomers, and we are unable to separate it (Chiral pak IA, IB, IC, OD, OB, OJ, AD, AS and Lux cellulose-1, cellulose-2, cellulose-3, cellulose-4, amylose-1 was used as a stationary phase).

Sample name: Rashmita 4-Br-cinnamyl with NBRC3319

Column: CHIRALCEL OD-H; Flow rate: 1.0 ml/min

Mobile phase: 90:10; hexane:IPA; Injection volume: 5 $\mu$ L

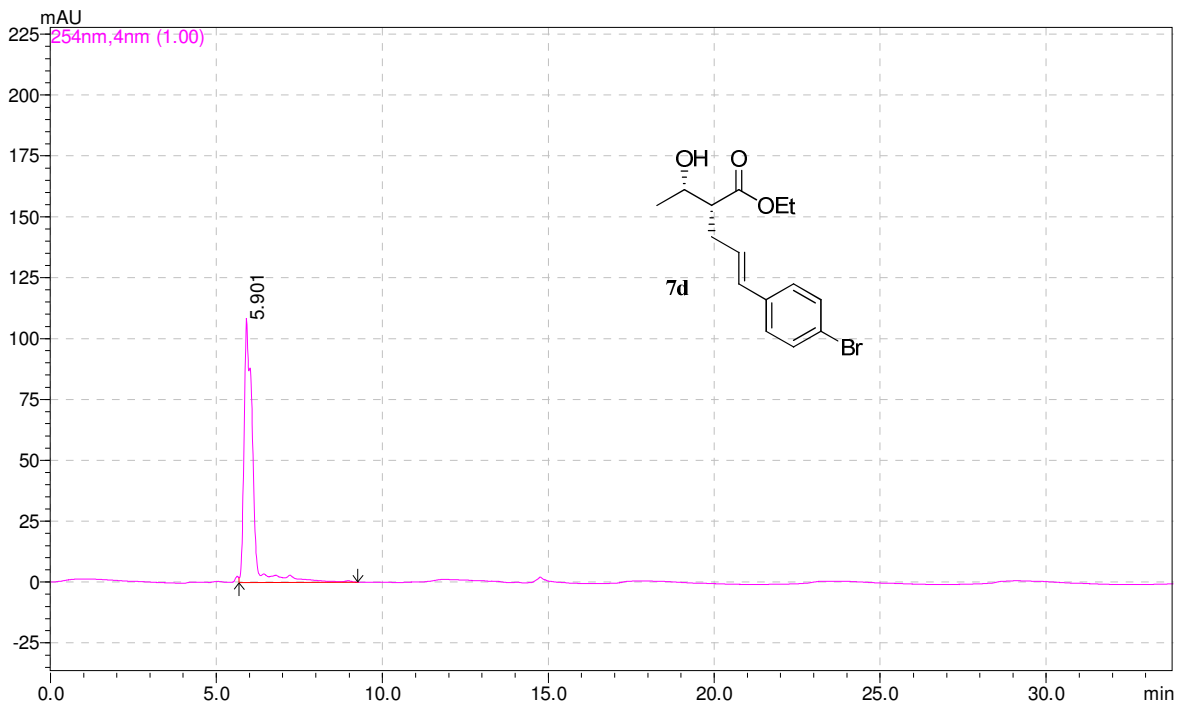

PDA Ch1 254nm 4nm

| Peak# | Ret time | Conc   | area    | Height | Area (%) |
|-------|----------|--------|---------|--------|----------|
| 1     | 5.901    | 100.00 | 1943435 | 108484 | 100      |

Sample name: Rashmita 4-Cl cinnamyl with NaBH<sub>4</sub>

Column: CHIRALPAK IA; Flow rate: 1.0 ml/min

Mobile phase: 90:10; hexane:IPA; Injection volume: 5μL

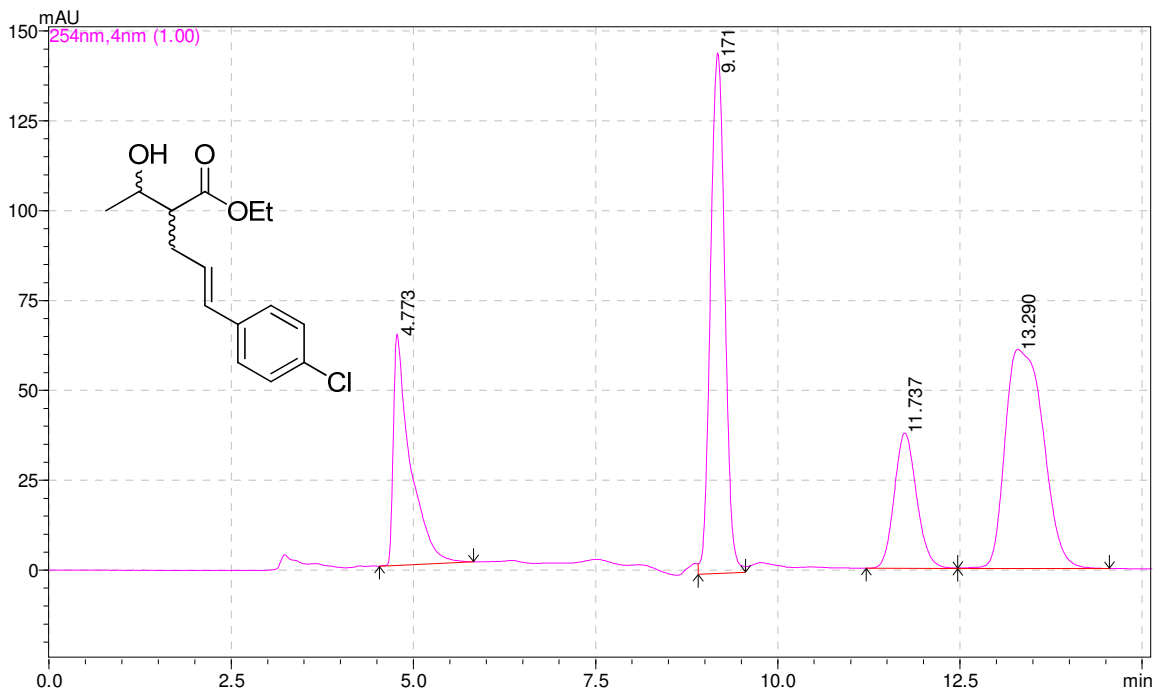

PDA Ch1 254nm 4nm

| Peak# | Ret time | Conc  | area    | Height | Area (%) |
|-------|----------|-------|---------|--------|----------|
| 1     | 4.773    | 15.21 | 1038279 | 64218  | 15.21    |
| 2     | 9.171    | 34.42 | 1979160 | 144725 | 9.171    |
| 3     | 11.737   | 14.68 | 801259  | 37629  | 14.68    |
| 4     | 13.290   | 35.69 | 2213526 | 60932  | 35.69    |

Sample name: Rashmita 4-Cl cinnamyl with NBRC3319

Column: CHIRALPAK IA; Flow rate: 1.0 ml/min

Mobile phase: 90:10; hexane:IPA; Injection volume: 5 $\mu$ L

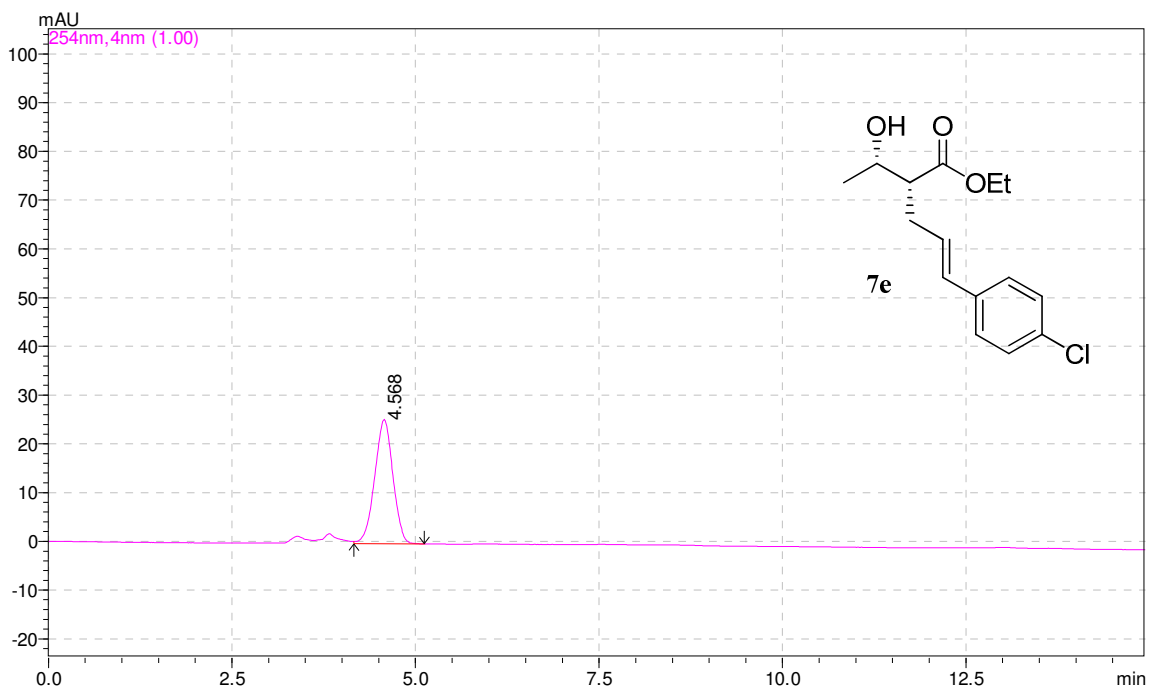

PDA Ch1 254nm 4nm

| Peak# | Ret time | Conc      | area   | Height | Area (%) |
|-------|----------|-----------|--------|--------|----------|
| 1     | 4.568    | 100.00000 | 440960 | 25425  | 100      |

Sample name: Rashmita 4-OMe cinnamyl with NaBH<sub>4</sub>

Column: CHIRALPAK IA; Flow rate: 1.0 ml/min

Mobile phase: 90:10; hexane:IPA; Injection volume: 5μL

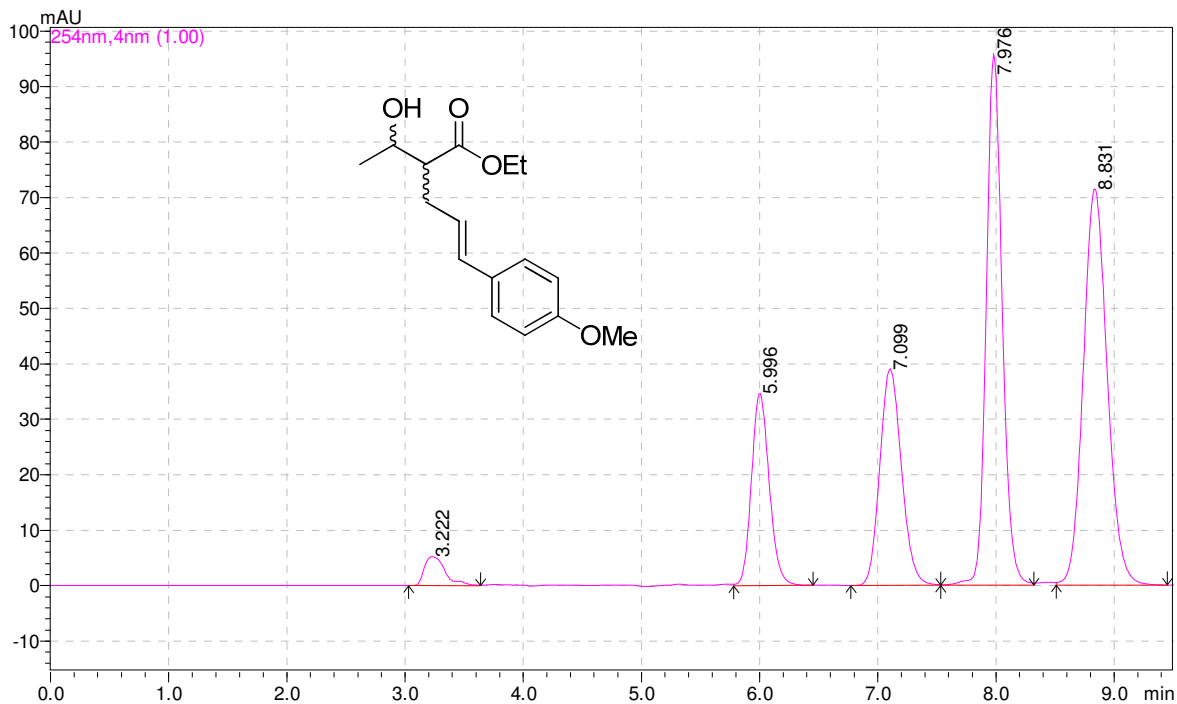

PDA Ch1 254nm 4nm

| Peak# | Ret time | Conc  | area    | Height | Area (%) |
|-------|----------|-------|---------|--------|----------|
| 1     | 3.222    | 2.81  | 65555   | 5245   | 2.81     |
| 2     | 5.996    | 14.98 | 363466  | 34676  | 14.98    |
| 3     | 7.099    | 16.75 | 498664  | 39037  | 16.75    |
| 4     | 7.977    | 32.78 | 900928  | 95732  | 32.78    |
| 5     | 8.831    | 32.68 | 1005636 | 71450  | 32.68    |

Sample name: Rashmita 4-OMe cinnamyl with NBRC3319

Column: CHIRALPAK IA; Flow rate: 1.0 ml/min

Mobile phase: 90:10; hexane:IPA; Injection volume: 5 $\mu$ L

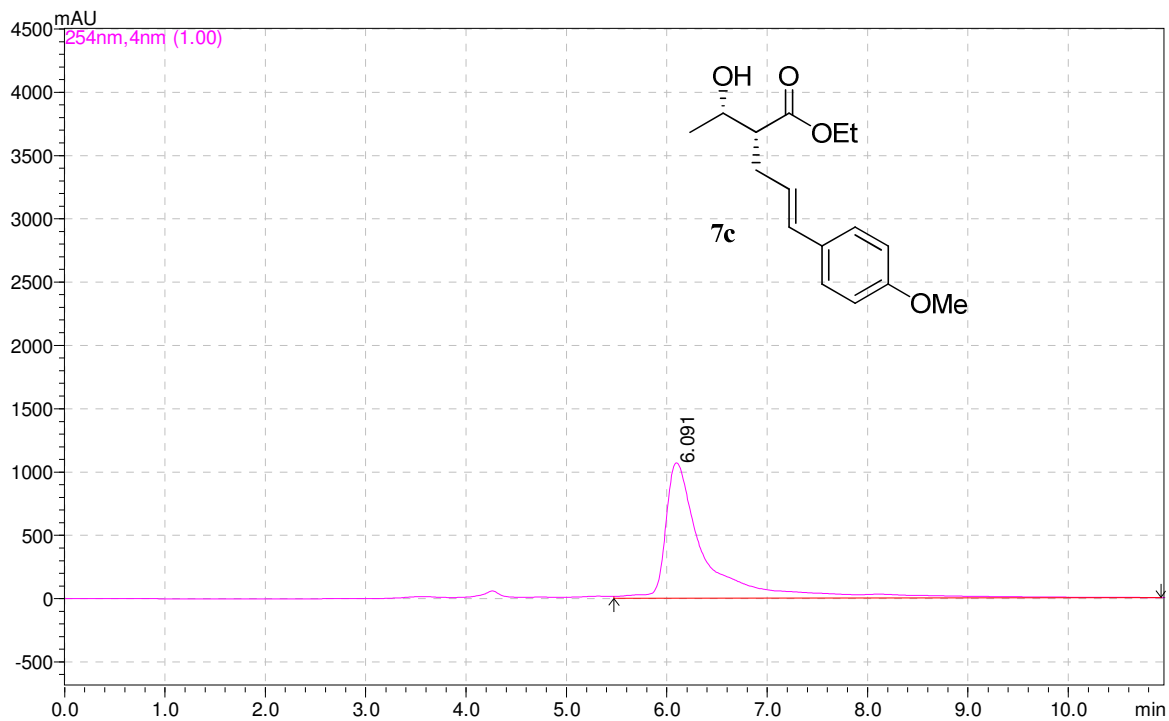

PDA Ch1 254nm 4nm

| Peak# | Ret time | Conc      | area     | Height  | Area (%) |
|-------|----------|-----------|----------|---------|----------|
| 1     | 6.091    | 100.00000 | 29274898 | 1069543 | 100      |

Sample name: Rashmita 3,5-diOMe cinnamyl with NaBH<sub>4</sub>

Column: CHIRALPAK IA; Flow rate: 1.0 ml/min

Mobile phase: 90:10; hexane:IPA; Injection volume: 5µL

Additional information: Manually integrated

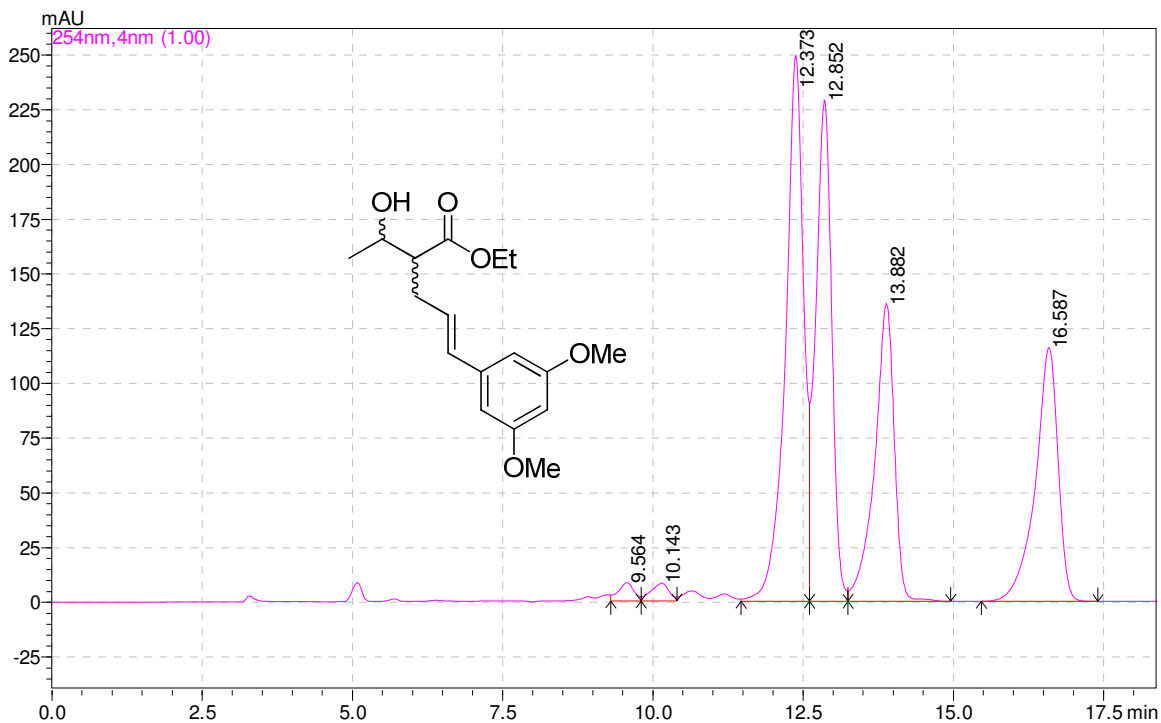

PDA Ch1 254nm 4nm

| Peak# | Ret time | Conc  | area    | Height | Area (%) |
|-------|----------|-------|---------|--------|----------|
| 1     | 9.564    | 0.94  | 148394  | 8315   | 0.94     |
| 2     | 10.143   | 1.22  | 169182  | 8124   | 1.22     |
| 3     | 12.373   | 29.88 | 5243338 | 248962 | 29.88    |
| 4     | 12.852   | 29.62 | 4243615 | 228780 | 29.62    |
| 5     | 13.882   | 19.22 | 3049582 | 116237 | 19.22    |
| 5     | 16.587   | 19.12 | 3048565 | 115816 | 19.12    |



Sample name: Rashmita 3,5-diOMe cinnamyl with NBRC 3319

Column: CHIRALPAK IA; Flow rate: 1.0 ml/min

Mobile phase: 90:10; hexane:IPA; Injection volume: 5µL

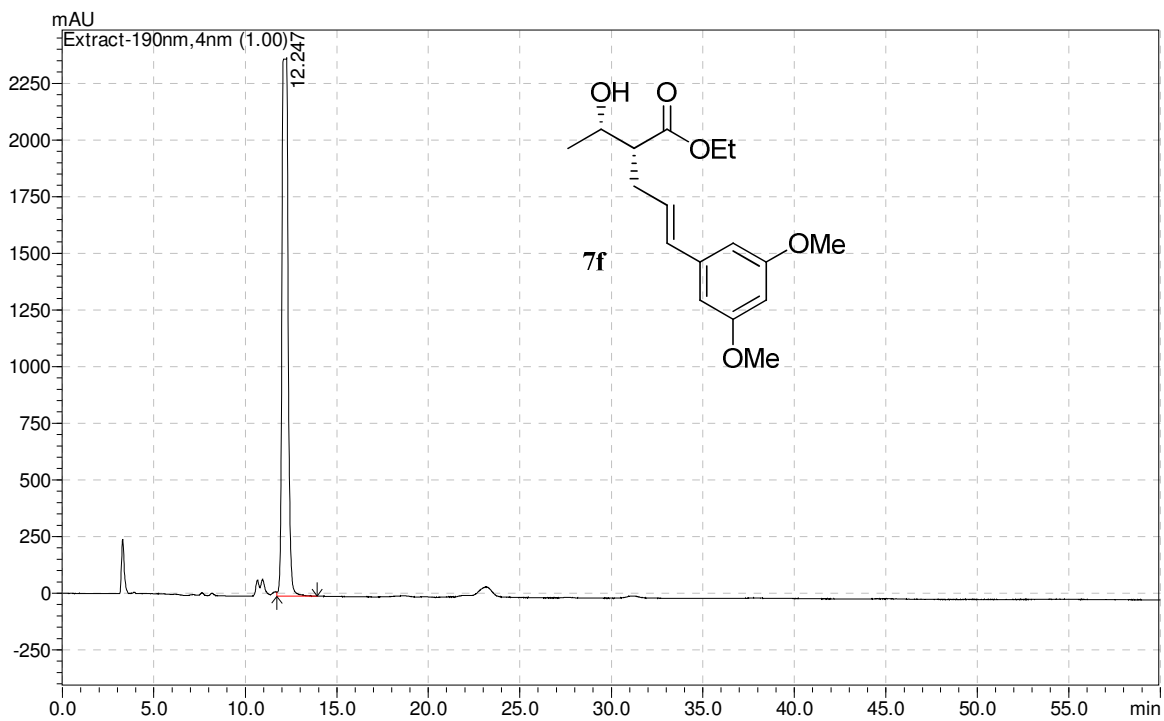

PDA Ch1 190nm 4nm

| Peak# | Ret time | Conc      | area     | Height  | Area (%) |
|-------|----------|-----------|----------|---------|----------|
| 1     | 12.247   | 100.00000 | 55318232 | 2377239 | 100      |

Sample name: Rashmita 3-NO<sub>2</sub>-cinnamyl with NaBH<sub>4</sub>

Column: CHIRALPAK IA; Flow rate: 0.8 ml/min

Mobile phase: 98:2; hexane:IPA; Injection volume: 5μL

Additional information: Manually integrated

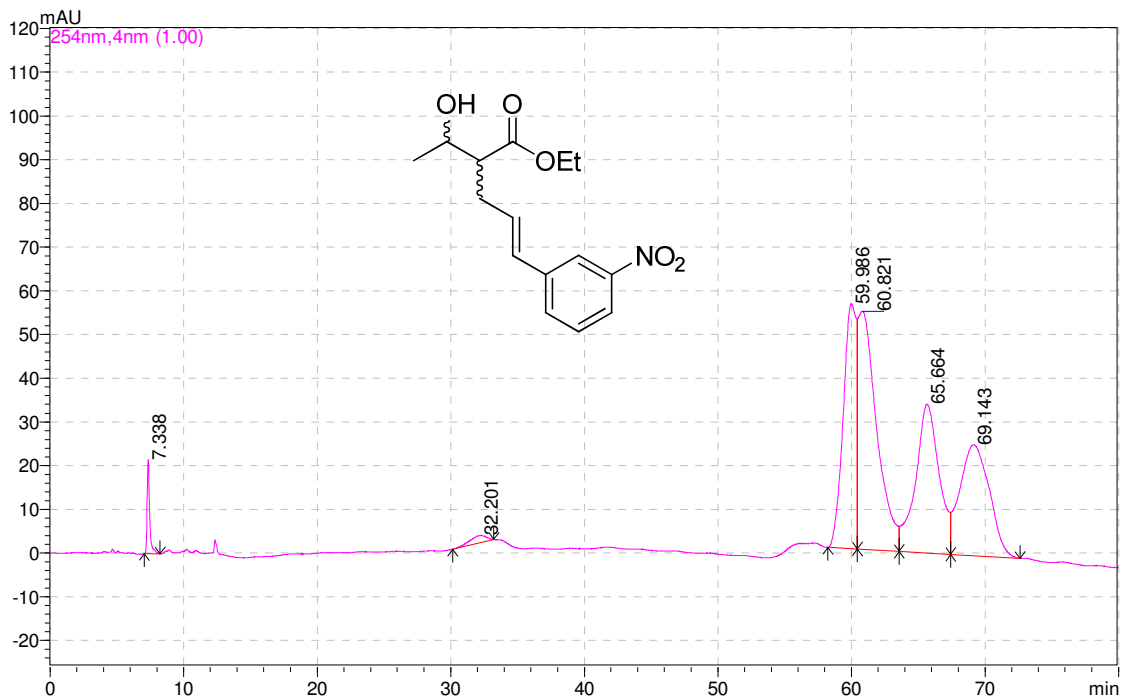

PDA Ch1 254nm 4nm

| Peak# | Ret time | Conc  | area    | Height | Area (%) |
|-------|----------|-------|---------|--------|----------|
| 1     | 7.338    | 1.62  | 286509  | 21508  | 1.62     |
| 2     | 32.201   | 0.83  | 147320  | 1661   | 0.83     |
| 3     | 59.986   | 22.59 | 3812370 | 56096  | 22.59    |
| 4     | 60.821   | 28.60 | 5335049 | 54461  | 28.60    |
| 5     | 65.664   | 23.22 | 4174629 | 34037  | 23.22    |
| 6     | 69.143   | 23.14 | 3912073 | 25427  | 23.14    |

Sample name: Rashmita 3-NO<sub>2</sub>-cinnamyl with NBRC3319

Column: CHIRALPAK IA; Flow rate: 0.8 ml/min

Mobile phase: 98:2; hexane:IPA; Injection volume: 5μL

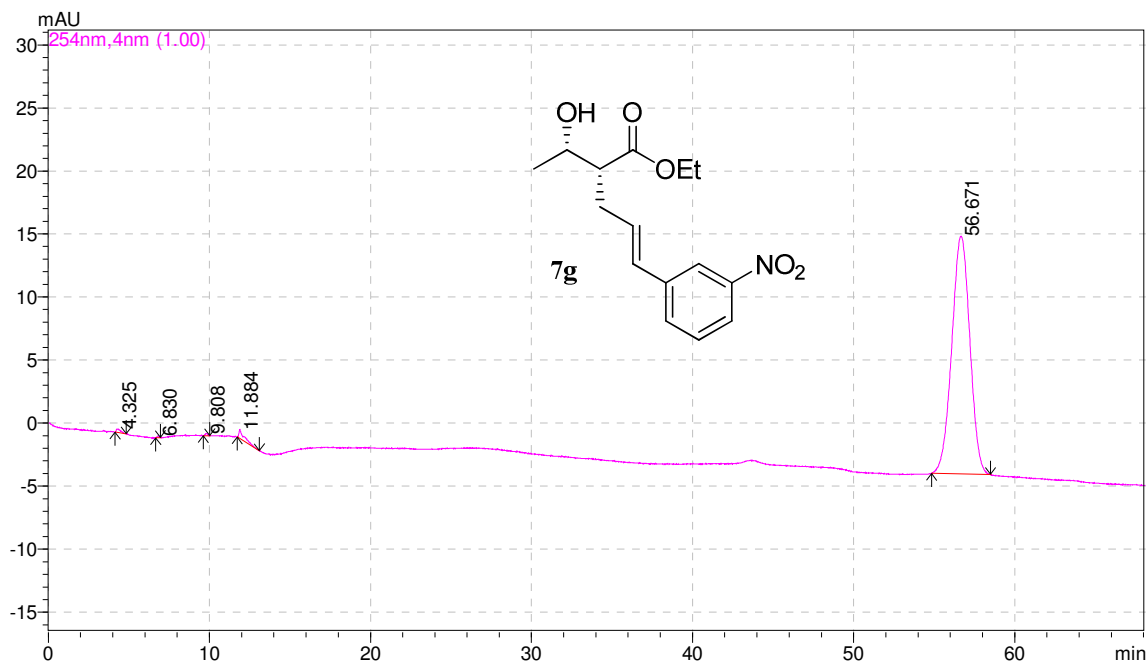

PDA Ch1 254nm 4nm

| Peak# | Ret time | Conc  | area    | Height | Area (%) |
|-------|----------|-------|---------|--------|----------|
| 1     | 4.325    | 0.25  | 5136    | 277    | 0.25     |
| 2     | 6.830    | 0.06  | 1280    | 145    | 0.06     |
| 3     | 9.808    | 0.09  | 1997    | 183    | 0.09     |
| 4     | 11.884   | 0.85  | 17085   | 702    | 0.85     |
| 5     | 56.671   | 98.75 | 1471685 | 18868  | 98.75    |

Sample name: Rashmita 4- NO<sub>2</sub>-cinnamyl with NaBH<sub>4</sub>

Column: CHIRALPAK IA; Flow rate: 1.0 ml/min

Mobile phase: 90:10; hexane:IPA; Injection volume: 5μL

Additional information: Manually integrated

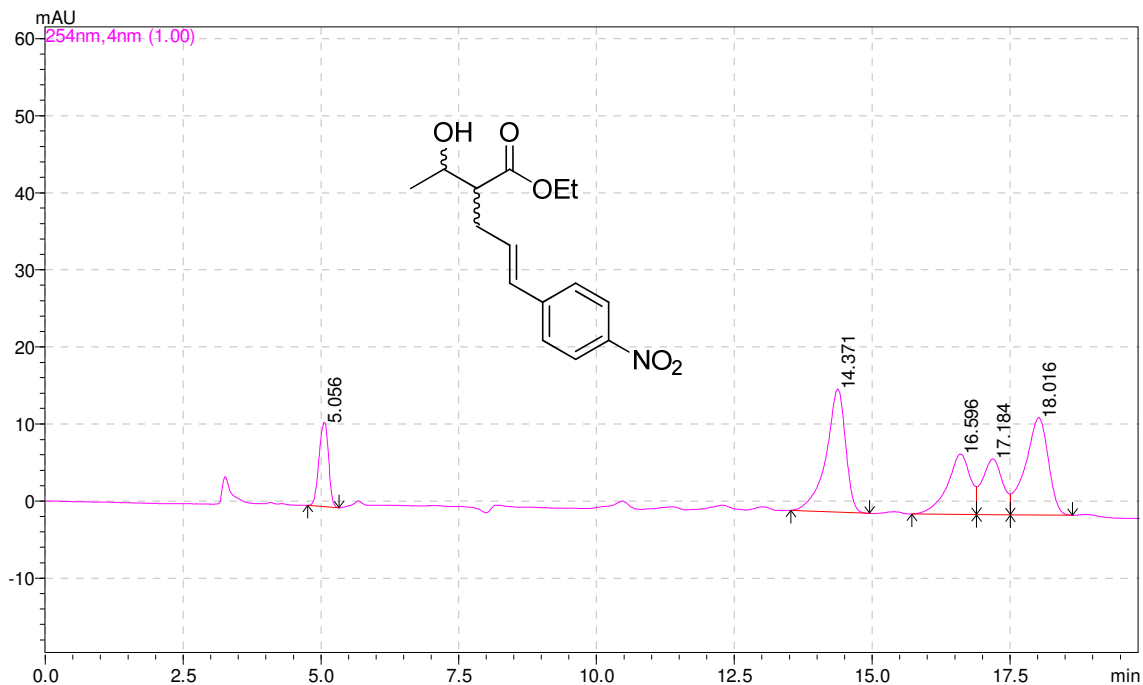

PDA Ch1 254nm 4nm

| Peak# | Ret time | Conc  | area   | Height | Area (%) |
|-------|----------|-------|--------|--------|----------|
| 1     | 5.056    | 10.12 | 131631 | 10943  | 10.12    |
| 2     | 14.371   | 29.86 | 388884 | 15956  | 29.86    |
| 3     | 16.596   | 15.68 | 230247 | 7853   | 15.68    |
| 4     | 17.184   | 15.23 | 18531  | 7237   | 15.23    |
| 5     | 18.016   | 29.11 | 366114 | 12635  | 29.11    |

Sample name: Rashmita 4- NO<sub>2</sub>-cinnamyl with NBRC 3319

Column: CHIRALPAK IA; Flow rate: 1.0 ml/min

Mobile phase: 90:10; hexane:IPA; Injection volume: 5μL

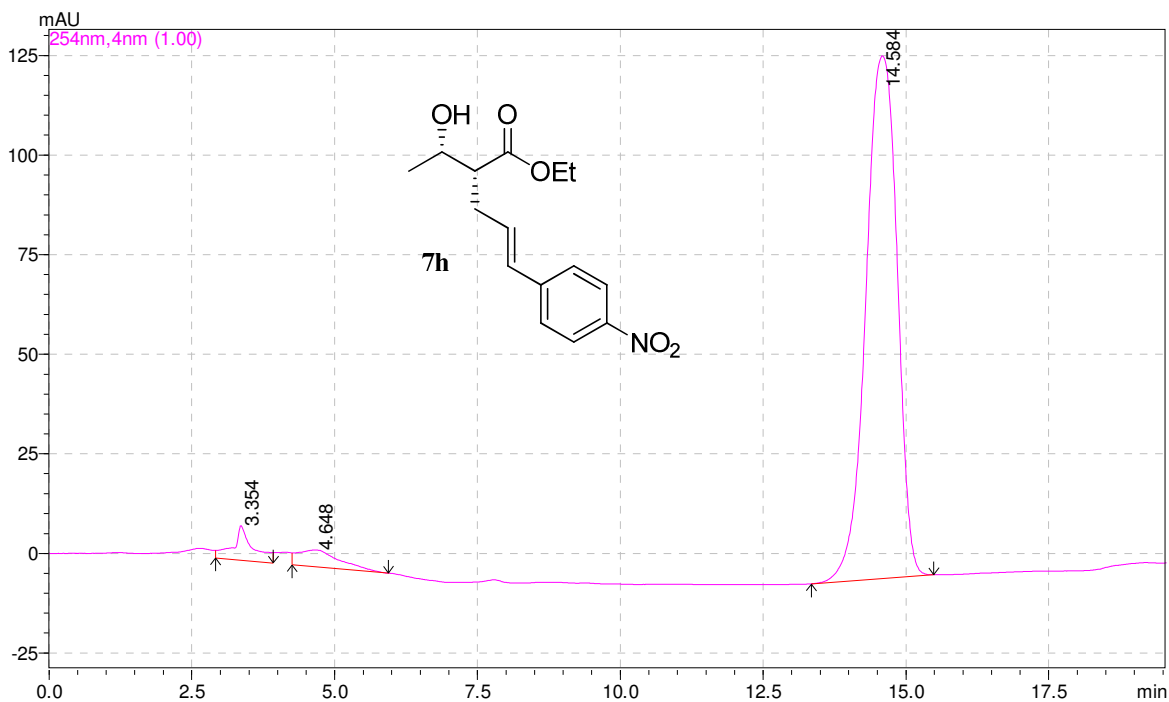

PDA Ch1 254nm 4nm

| Peak# | Ret time | Conc  | area    | Height | Area (%) |
|-------|----------|-------|---------|--------|----------|
| 1     | 3.354    | 3.92  | 212675  | 8650   | 3.92     |
| 2     | 4.648    | 3.97  | 215802  | 4239   | 3.97     |
| 3     | 14.584   | 92.11 | 5003250 | 131182 | 92.11    |

Sample name: Rashmita 1-naphthyl cinnamyl with NaBH<sub>4</sub>

Column: CHIRALPAK IC; Flow rate: 0.8 ml/min

Mobile phase: 98:2; hexane:IPA; Injection volume: 5μL

Additional information: Manually integrated

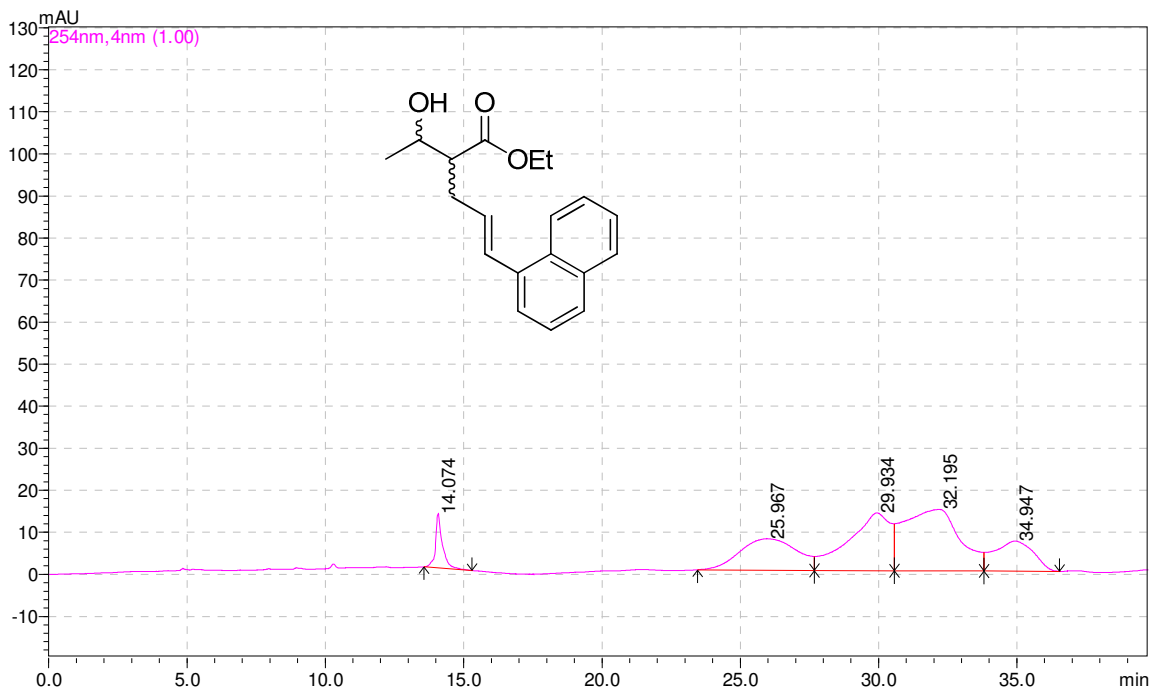

PDA Ch1 254nm 4nm

| Peak# | Ret time | Conc  | area    | Height | Area (%) |
|-------|----------|-------|---------|--------|----------|
| 1     | 14.074   | 4.12  | 226853  | 12903  | 4.12     |
| 2     | 25.967   | 17.40 | 1073158 | 7459   | 17.40    |
| 3     | 29.934   | 27.25 | 1451666 | 13724  | 27.25    |
| 4     | 32.195   | 34.34 | 2064785 | 14679  | 34.34    |
| 5     | 34.947   | 16.89 | 713073  | 7208   | 16.89    |

Sample name: Rashmita 1-naphthyl cinnamyl with NBRC 3319

Column: CHIRALPAK IC; Flow rate: 0.8 ml/min

Mobile phase: 98:2; hexane:IPA; Injection volume: 5µL

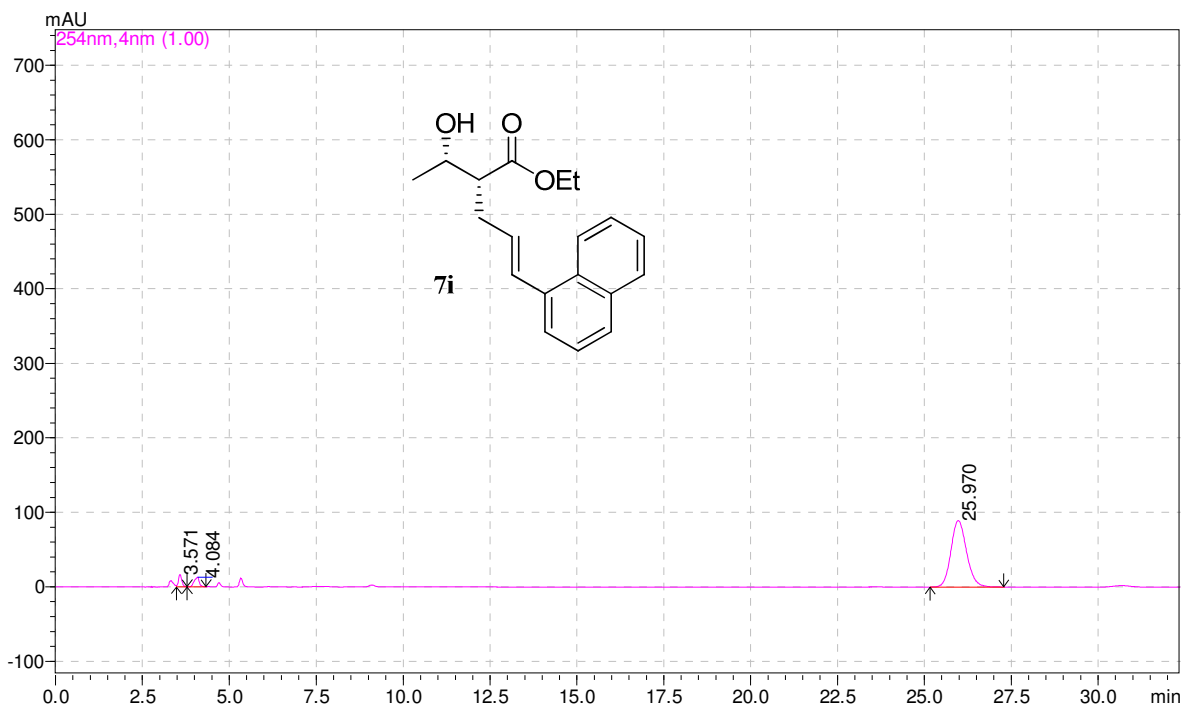

PDA Ch1 254nm 4nm

| Peak# | Ret time | Conc  | area    | Height | Area (%) |
|-------|----------|-------|---------|--------|----------|
| 1     | 3.571    | 3.69  | 111221  | 16563  | 3.69     |
| 2     | 4.084    | 4.41  | 133103  | 12884  | 4.41     |
| 3     | 25.970   | 91.90 | 2768238 | 89113  | 91.90    |

Sample name: Rashmita 2-naphthyl cinnamyl with NaBH<sub>4</sub>

Column: CHIRALPAK IC; Flow rate: 0.8 ml/min

Mobile phase: 98:2; hexane:IPA; Injection volume: 5µL

Additional information: Manually integrated

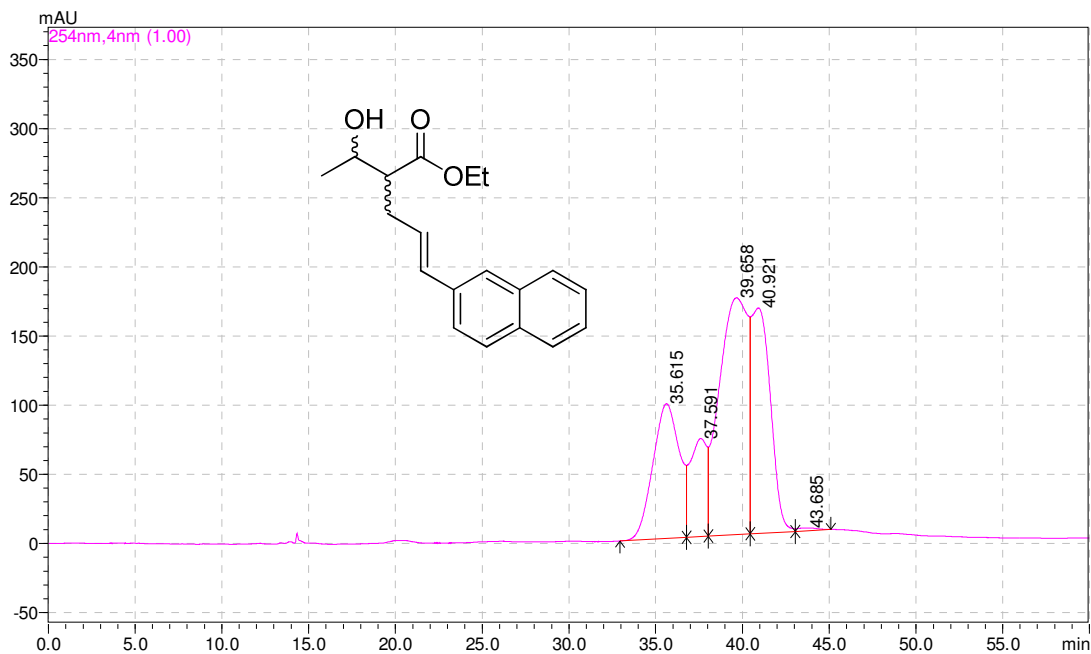

PDA Ch1 254nm 4nm

| Peak# | Ret time | Conc  | area     | Height | Area (%) |
|-------|----------|-------|----------|--------|----------|
| 1     | 35.615   | 21.83 | 10390352 | 97437  | 21.83    |
| 2     | 37.591   | 12.98 | 4749236  | 70967  | 12.98    |
| 3     | 39.658   | 36.37 | 19687025 | 171268 | 36.37    |
| 4     | 40.921   | 28.45 | 12586259 | 163067 | 28.45    |
| 5     | 43.685   | 0.37  | 163327   | 2069   | 0.37     |



Sample name: Rashmita 2-naphthyl cinnamyl with NBRC 3319

Column: CHIRALPAK IC; Flow rate: 0.8 ml/min

Mobile phase: 98:2; hexane:IPA; Injection volume: 5 $\mu$ L

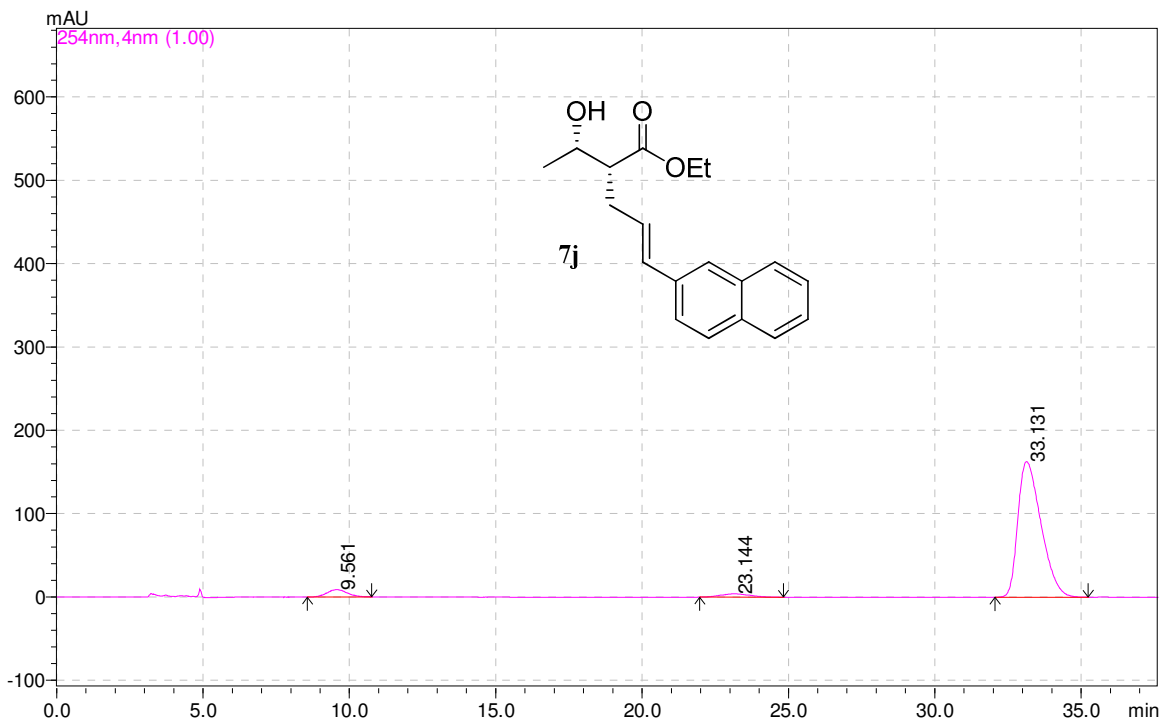

PDA Ch1 254nm 4nm

| Peak# | Ret time | Conc | area    | Height | Area (%) |
|-------|----------|------|---------|--------|----------|
| 1     | 9.561    | 4.31 | 415415  | 8747   | 4.31     |
| 2     | 23.144   | 2.69 | 259332  | 3834   | 2.69     |
| 3     | 33.131   | 93.0 | 8951592 | 162548 | 93.0     |

Sample name: Rashmita 2OMe-1-naphthyl cinnamyl with NaBH<sub>4</sub>

Column: CHIRALPAK IA; Flow rate: 0.8 ml/min

Mobile phase: 98:2; hexane:IPA; Injection volume: 5µL

Additional information: Manually integrated

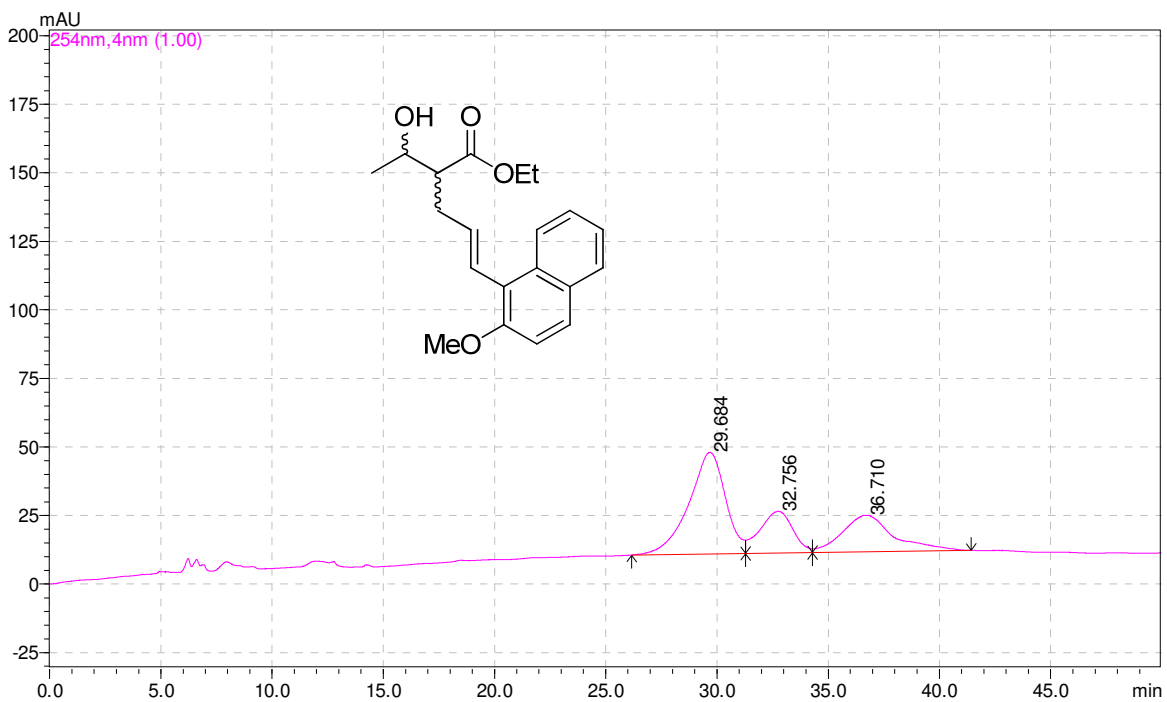

PDA Ch1 254nm 4nm

| Peak# | Ret time | Conc  | area    | Height | Area (%) |
|-------|----------|-------|---------|--------|----------|
| 1     | 29.684   | 50.26 | 4238799 | 37085  | 50.26    |
| 2     | 32.756   | 22.72 | 1568345 | 15235  | 22.72    |
| 3     | 36.710   | 27.02 | 2151060 | 13362  | 27.02    |

The peak at 29.684 corresponds to two stereoisomers, and we are unable to separate it (Chiral pak IA, IB, IC, OD, OB, OJ, AD, AS and Lux cellulose-1, cellulose-2, cellulose-3, cellulose-4, amylose-1 was used as a stationary phase).

Sample name: Rashmita 2OMe-1-naphthyl cinnamyl with NBRC3319

Column: CHIRALPAK IA; Flow rate: 0.8 ml/min

Mobile phase: 98:2; hexane:IPA; Injection volume: 5µL

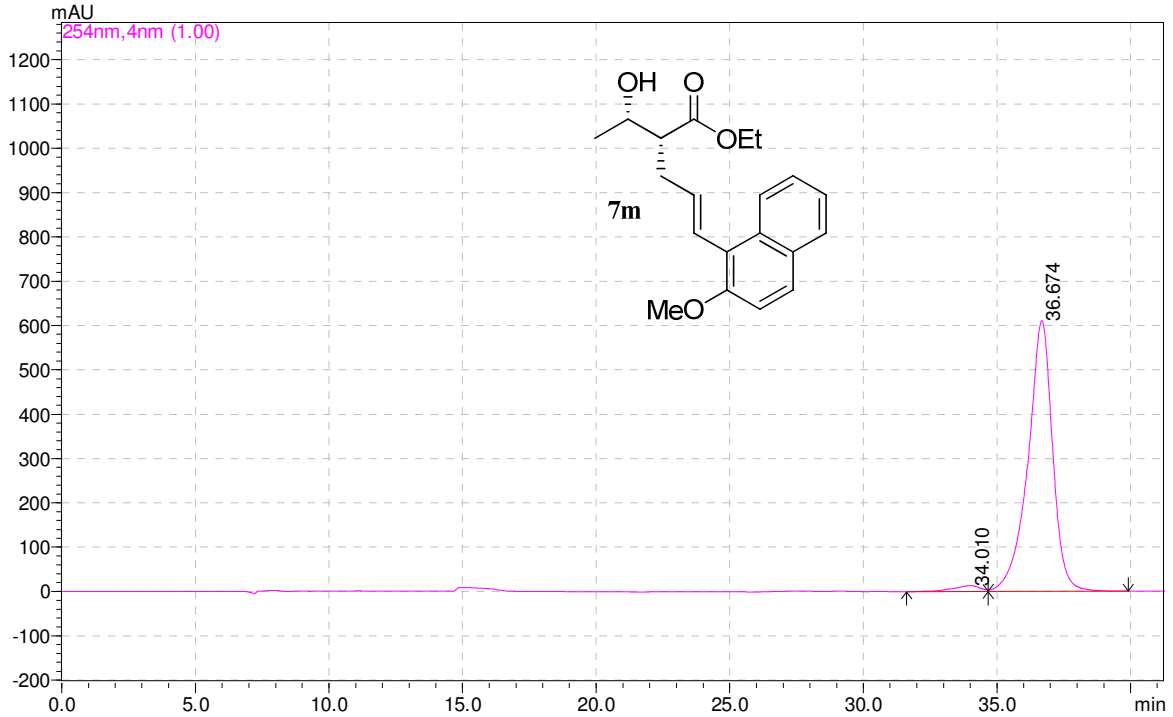

PDA Ch1 254nm 4nm

| Peak# | Ret time | Conc  | area     | Height | Area (%) |
|-------|----------|-------|----------|--------|----------|
| 1     | 34.010   | 1.51  | 1013364  | 13885  | 1.31     |
| 2     | 36.674   | 98.49 | 39343638 | 610981 | 98.49    |

Sample name: Rashmita 4-OMe-1-naphthyl cinnamyl with NaBH<sub>4</sub>

Column: CHIRALPAK IA; Flow rate: 1.0 ml/min

Mobile phase: 90:10; hexane:IPA; Injection volume: 5μL

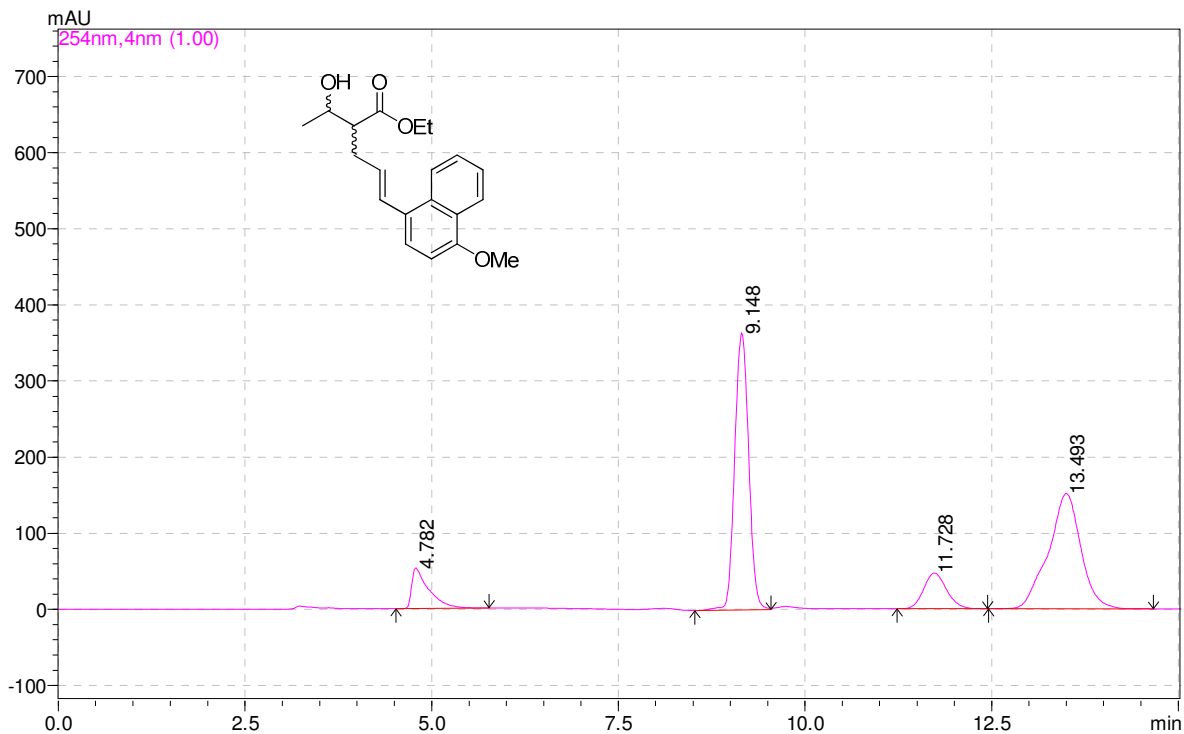

PDA Ch1 254nm 4nm

| Peak# | Ret time | Conc  | area    | Height | Area (%) |
|-------|----------|-------|---------|--------|----------|
| 1     | 4.782    | 10.51 | 840183  | 53200  | 10.56    |
| 2     | 9.148    | 39.77 | 4747524 | 363624 | 39.77    |
| 3     | 11.728   | 10.55 | 1001133 | 46823  | 10.55    |
| 4     | 13.493   | 39.17 | 4588379 | 151534 | 39.17    |

Sample name: Rashmita 4-OMe-1-naphthyl cinnamyl with NBRC3319

Column: CHIRALPAK IA; Flow rate: 1.0 ml/min

Mobile phase: 90:10; hexane:IPA; Injection volume: 5 $\mu$ L

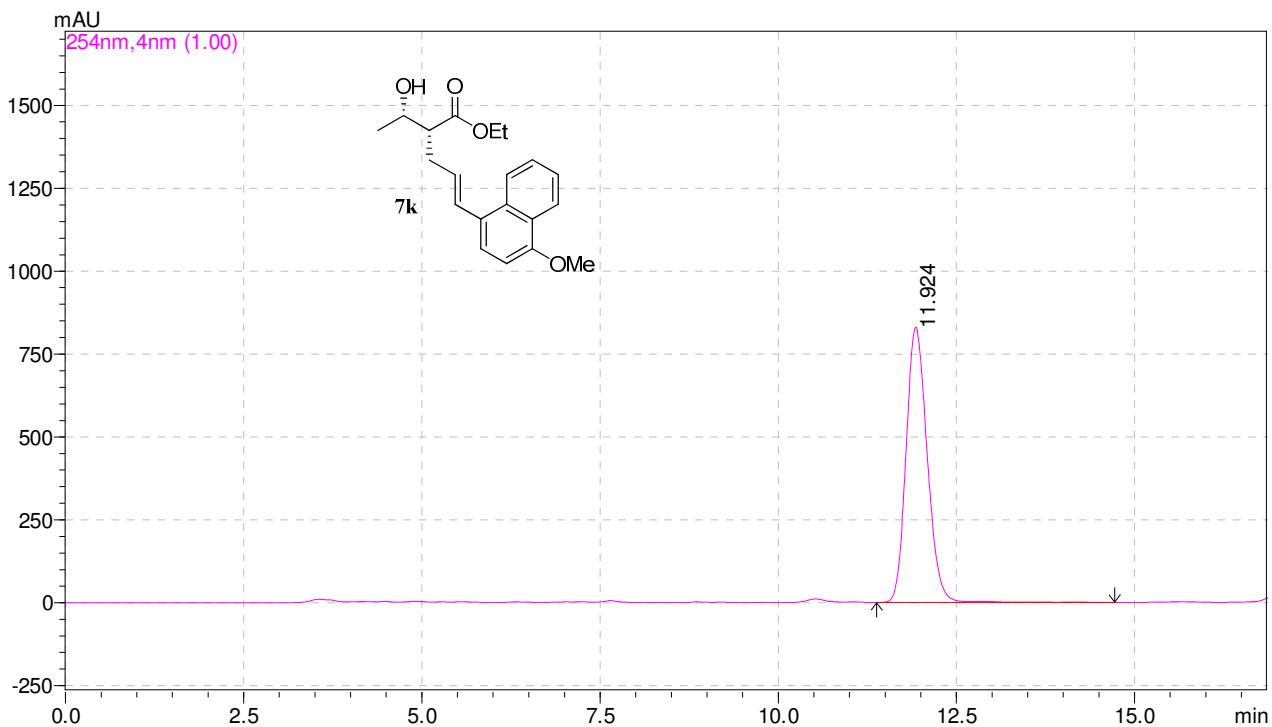

PDA Ch1 254nm 4nm

| Peak# | Ret time | Conc      | area     | Height | Area (%) |
|-------|----------|-----------|----------|--------|----------|
| 1     | 11.924   | 100.00000 | 17137545 | 830224 | 100      |

Sample name: Rashmita 6-OMe-2-naphthyl cinnamyl with NaBH<sub>4</sub>

Column: CHIRALPAK IA; Flow rate: 1.0 ml/min

Mobile phase: 90:10; hexane:IPA; Injection volume: 5 $\mu$ L

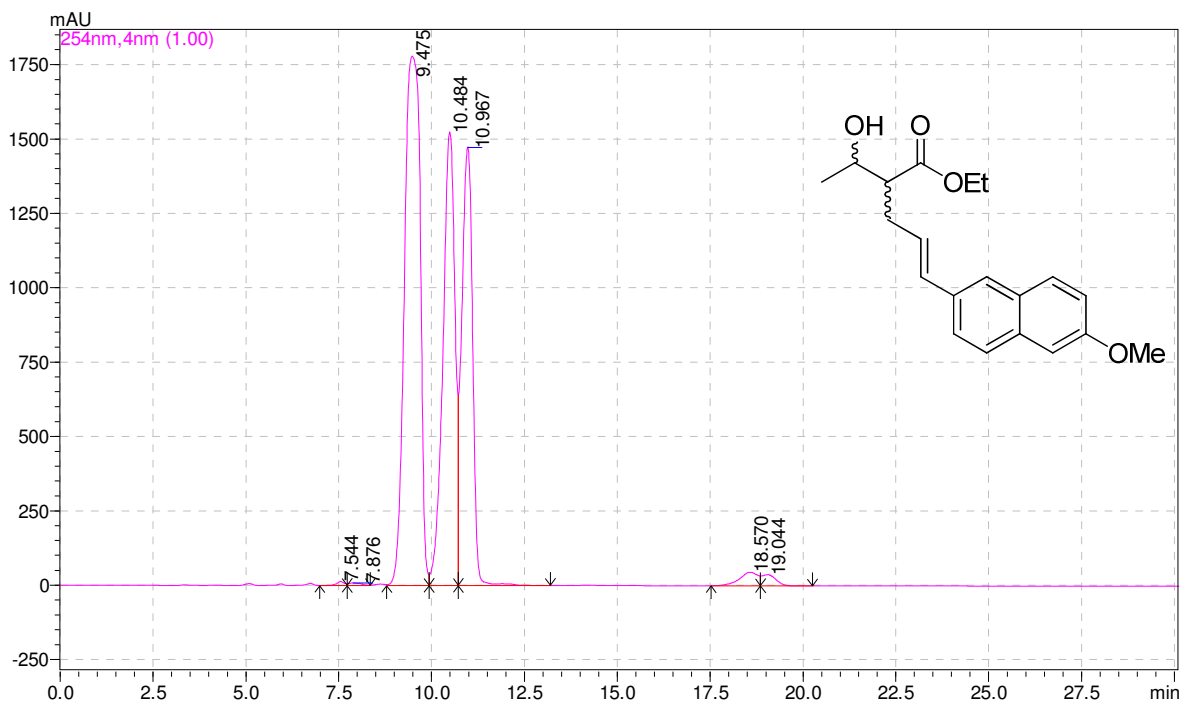

PDA Ch1 254nm 4nm

| Peak# | Ret time | Conc  | area     | Height  | Area (%) |
|-------|----------|-------|----------|---------|----------|
| 1     | 7.544    | 0.15  | 187795   | 13243   | 0.15     |
| 2     | 7.876    | 0.16  | 194941   | 8272    | 0.16     |
| 3     | 9.475    | 43.81 | 52667194 | 1778996 | 43.81    |
| 4     | 10.484   | 26.90 | 34745520 | 1523359 | 26.90    |
| 5     | 10.967   | 26.81 | 29827442 | 1472695 | 26.81    |
| 6     | 18.570   | 1.33  | 1605532  | 45890   | 1.33     |
| 7     | 19.044   | 0.84  | 985941   | 37294   | 0.84     |

The peak at 9.475 corresponds to two stereoisomers, and we are unable to separate it (Chiral pak IA, IB, IC, OD, OB, OJ, AD, AS and Lux cellulose-1, cellulose-2, cellulose-3, cellulose-4, amylose-1 was used as a stationary phase).

Sample name: Rashmita 6-OMe-2-naphthyl cinnamyl with NBRC3319

Column: CHIRALPAK IA; Flow rate: 1.0 ml/min

Mobile phase: 90:10; hexane:IPA; Injection volume: 5µL

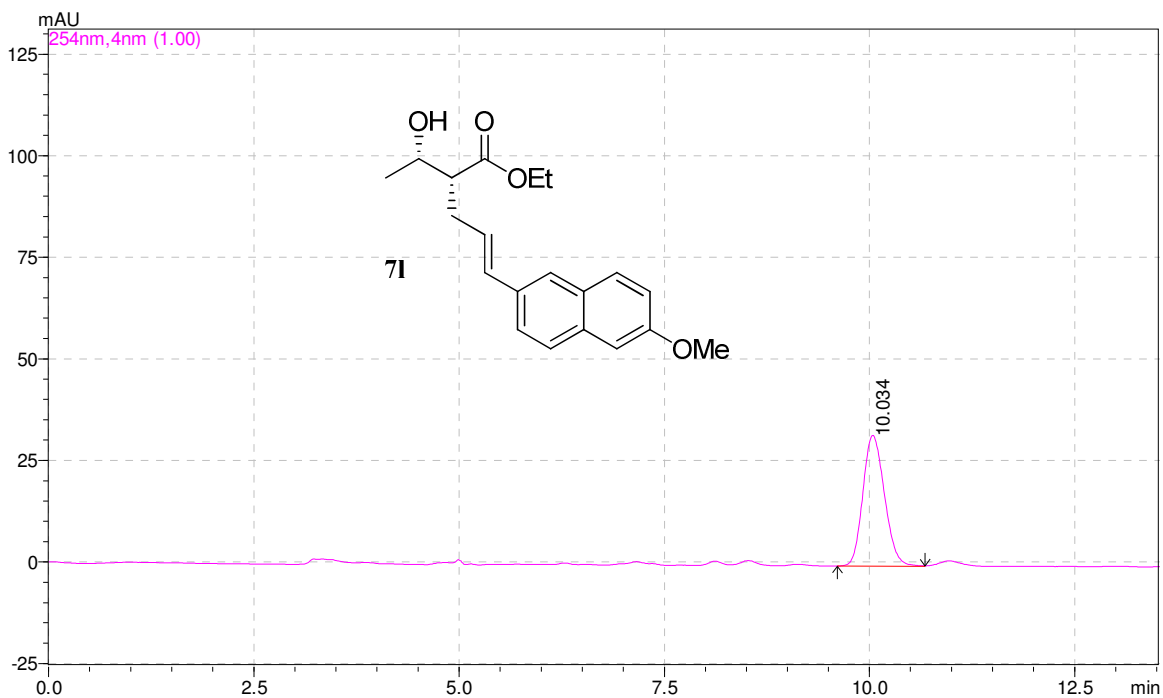

PDA Ch1 254nm 4nm

| Peak# | Ret time | Conc      | area   | Height | Area (%) |
|-------|----------|-----------|--------|--------|----------|
| 1     | 10.034   | 100.00000 | 589356 | 32155  | 100      |

Sample name: Rashmita 2-thienyl cinnamyl with NaBH<sub>4</sub>

Column: CHIRALPAK IA; Flow rate: 0.8 ml/min

Mobile phase: 98:2; hexane:IPA; Injection volume: 5μL

Additional information: Manually integrated

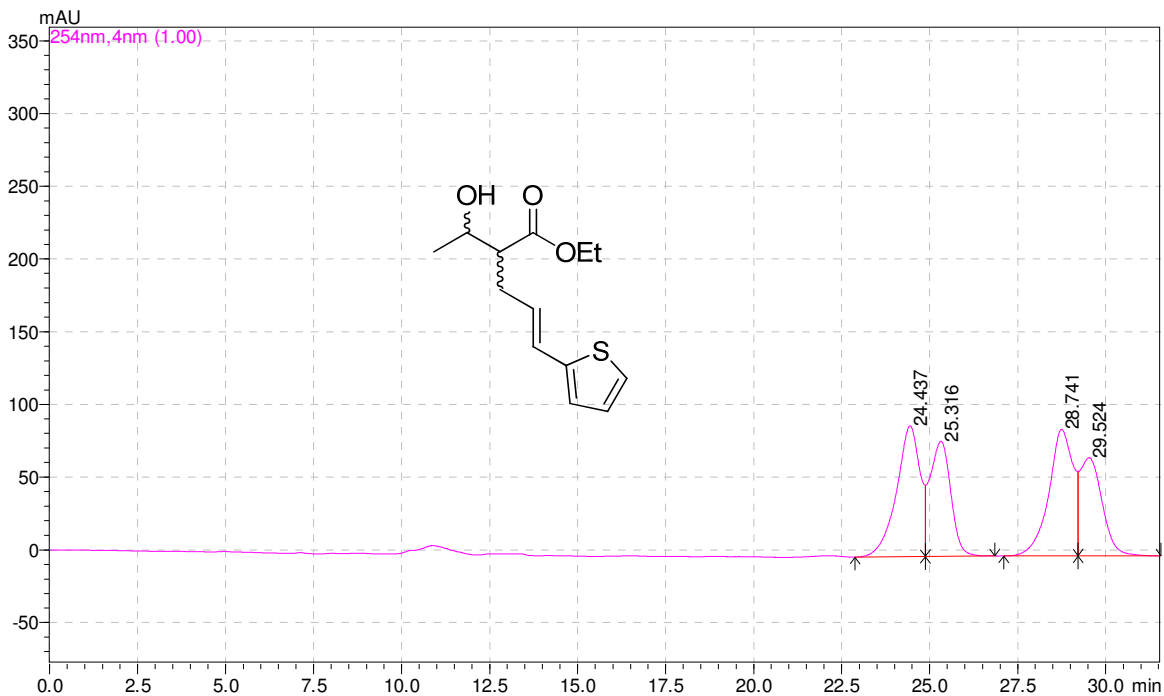

PDA Ch1 254nm 4nm

| Peak# | Ret time | Conc  | area    | Height | Area (%) |
|-------|----------|-------|---------|--------|----------|
| 1     | 24.437   | 26.63 | 4198134 | 89974  | 26.63    |
| 2     | 25.316   | 24.29 | 3867973 | 79247  | 24.29    |
| 3     | 28.741   | 26.92 | 4241355 | 87088  | 26.92    |
| 4     | 29.524   | 22.16 | 3453383 | 67620  | 22.16    |



Sample name: Rashmita 2-thienyl cinnamyl with NBRC 3319

Column: CHIRALPAK IA; Flow rate: 0.8 ml/min

Mobile phase: 98:2; hexane:IPA; Injection volume: 5µL

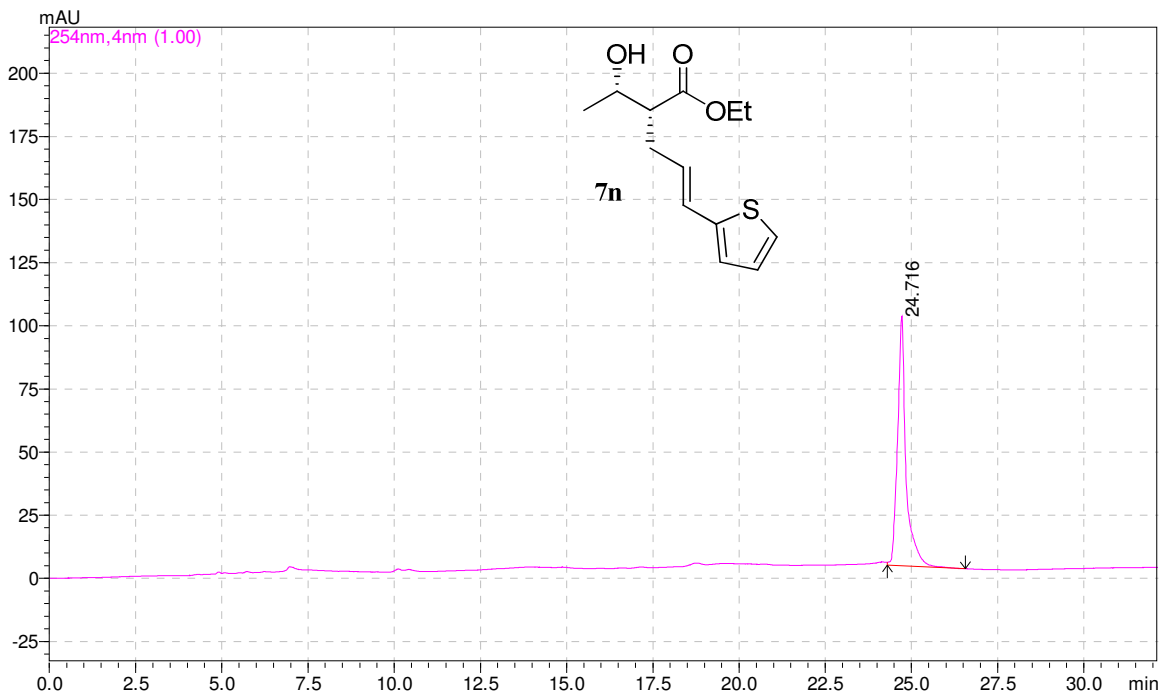

PDA Ch1 254nm 4nm

| Peak# | Ret time | Conc   | area    | Height | Area (%) |
|-------|----------|--------|---------|--------|----------|
| 1     | 24.716   | 100.00 | 1693663 | 98877  | 100      |
